# Supplementary material for: PagDET2 promotes cambium cell division and xylem differentiation in poplar stem
Source: Front Plant Sci. 2022 Aug 26;13:923530. doi: 10.3389/fpls.2022.923530 (PMC9459238; doi:10.3389/fpls.2022.923530)
Supplement: Supplementary Table 1 — Sequence of the DET2 amino acid. [file Table_1.xlsx]

## Sheet: Table S1
Table S1 Sequence of the DET2 amino acid.
>AtDET2 AT2G38050.1
MEEIADKTFFRYCLLTLIFAGPPTAVLLKFLQAPYGKHNRTGWGPTVSPPIAWFVMESPTLWLTLLLFPFGRHALNPKSLLLFSPYLIHYFHRTIIYPLRLFRSSFPAGKNGFPITIAALAFTFNLLNGYIQARWVSHYKDDYEDGNWFWWRFVIGMVVFITGMYINITSDRTLVRLKKENRGGYVIPRGGWFELVSCPNYFGEAIEWLGWAVMTWSWAGIGFFLYTCSNLFPRARASHKWYIAKFKEEYPKTRKAVIPFVY
>Potri.016G110600.1
MALLDQSLFHYSLLSIYLIGPPTFISLKFLQAPYGKHHRPGWGPTISPPLAWILMESPTLWLTLLLFPYGQHFTNPKAIILMSPFLLHYFHRTCIYPLRIYRNSKTTGGFPVSVAVMAFGFNLLNAYLQARWVSHYKSDYDGGLFWWKFFGGLVVFVWGMRINTWADGVLLGLKREGGGYKVPRGGWFELVSCPNYFGEIVEWLGWAVMTWSWAGFGFLLYTCANLVPRACANHKWYLEKFKEDYPRSRKAVIPFLC
>Potri.005G047800.1
MALSDQSLFHYSLLTFYLLGPLTFVALKFFQLPYGRHHRLGWGFTVSPPLAWFLFETPSILLPLLLFPLGQHFTNLKALLLMSPYLLHYFHRTCIYPLRVYHSTTQQNTKTTSAVSVSMVLLAFMLQVLNTYLQTRWVSHYKHDYNSDGGLFWWKFFGGLVVFLWGMRINMWADTVLLGLKREGGGYKVPRGGWFELVSCPNYFGEMVEWLGWAVMTWSWAGFSFFLFTCSNLVPRACAHHKWYLKKFGEDYPNNRKAVIPFFI
>PagDET2
MALLDQSLFHYSLLSIYLIGPPTFISLKFLQAPYGKHHRPGWGPTISPPLAWILMESPTLWLTLLLFPYGQHFTNPKALI LMSPFLFHYFHRTCIYPLRIYRNSKTTGGFPVSVAVMAFGFNLLNAYLQARWVSHYKSDYDGGLFWWRFFGGLVVFVWGM RINTWTDGVLLGLKREGGGYKVPRGGWFELVSCPNYFGEIVEWFGWAVMTWSWAGFGFLLYTCANLVPRACANHKWYLEK FREDYPKNRKAVIPFLC
>GhDET2 AY141136
MASDQTLFHYCLLTLYIIALPTWISLYFLQAPYGKHNRPGWGPTISPPLAWFLMESPTLWLTFFLFPSGQHFYNPKSFLLISPFLFHYFNRTVLYPLRLARNTTQTRGFPVSVAFMAFGFNLLNGYLQARWVSHYKDYNEELFWWRFLGLLIFVVGMWVNVADKVLVGLKKQGDGGYKIPRGGLFELVSCPNYFGEIMEWFGWAVMTWSWVGFGFFLYTCANLMPRARATRLWYLEKFKDDYPKDRKAVIPFIY
>LeDET2 AJ786362
MFSSDENLFNFIVFFILVMAFPTFILCQFFTSPYGKHYTSADSGTTISPPIAWAFMESPTLWLTIIVFRLGKNYTNPLAFLLISPYLFHYTNRTIIYPLRLRSRNTKNNFPLNIAVTAFIFNLLNAYIQSRWVSHYANYQEDDWFWVRFGIGLVIFGSGMLLNIWADGVLLGLKSQGGGYKIPRGGLFDYVSSPNYLGEIMEWLGWALMTWSWAGLAFFVYTCANLVPRAVSNHKWYLQKFGEDYPKNRKAVFPFLY
>InDET2 AB106360
MMSIREVMESDQWLFRHSVFVLLLIAPPVYIACRFITAPFGKHVRPGWGPTISPPLAWFLMESPAIWLTLLLFPFGRSSSNPLAQILMAPYLLHYAHRTIVYPLRLYLNSDPRRAAAGFPVSVALMAFTFNILNAYLQTRWVSHYADYEGGGLFWWRFACGMAVFLAGMAVNVWADKVLLRLKSEGGGYKIPRGGLYEYVSCPNYFGEILEWLGWFLMTWSAAGFAFFLFTCANLMPRAWSHRQWYLEKFGEDYPRKRKAVIPFLY
>OsDET2 NM190631
MGGGGGDDALYARCLVILYLISPITVFLLRFVSAPYGKLSRPGWGPAVPAALAWFLMESPTMCLPPLVLSAAASSSALRAAALLPAALYALHYVNRTLVHPLRLLRLRRAPAPVPILVAAFAFGFNLLNAYVQARSWALDAAAPHSTATATATPAAVARCLVGLALFAWGMRTNIAADKALLRLKEAGKGYQIPRGGLFDVVTCPNYFGEAVEWLGYALVAWTPAAWAFFLYTCSNLGPRARDHRRWYVGKFGDKYPASRKAFVPYIY
>GmDET2 AF203341
MIPEHYSDSSLFHSSLLTLFLIAPPTFFSLTFLQAPYGKHHRPGWGPNLPPPLAWLLMESPTLWLTLLLFPLGLHSHNPKAQALITPFLIHYFNRTILYPLHLLLTPSKKTTPGFPLSVALMAFAFNVLNSYLQARTVSHYNNHYDDSGFFWFRFLCGLLVFLLGMGINVWADRVLLRLKSEGKGYVVPRGGLFELVACPNYFGEIVEWLGWAVMTWSWAGLGFFVYTFANLGPRARANRRWYLEKFGEDYPKERKAVIPYLY

## Sheet: Table S2
Table S2 Sequence of the primers used in this study.
	DET2-SF	ATGGCCCTATTAGATCAGAGCCTCTT
	DET2-SR	TCAACACAGAAAAGGGATCACTGCT
	amiR-DET2-SF	TGTATTCCCTCTTCAAACCTAACATATGATGATCACATTCGTTATCTATTTTTTATGTTAGGTTGGAAGAGGGAA
	amiR-DET2-SR	AATGTTCCCTCTTCCAACCTAACATAAAAAATAGATAACGAATGTGATCATCATATGTTAGGTTTGAAGAGGGAA
	hyg-SF	ATGAAAAAGCCTGAACTCACCG
	hyg-SR	TGATACACATGGGGATCAGCAA
	Actin-F	AAACTGTAATGGTCCTCCCTCCG
	Actin-R	GCATCATCACAATCACTCTCCGA
	DET2-QRT-F	ATGGCCCTATTAGATCAGAGC
	DET2-QRT-R	GGCTTTCCATGAGGATCCAA
	ERF1-QRT-F	ACCTTCGACAGTGCAGAGGC
	ERF1-QRT-R	GGCGAACACCCATCTTCACA
	NRT1.5-QRT-F	AGCGATTCCTACTGGGGAAG
	NRT1.5-QRT-R	GGGATCCACATGGAGTCAGC
	CYCB1;4-QRT-F	GTTGGTACCAAGGAGGGAAC
	CYCB1;4-QRT-R	CTTTCTCCATTGCCAGAACT
	XTH33-QRT-F	GGAGGCTCAAATACTAAGCT
	XTH33-QRT-R	TACTACAACACCAGGGGACA
	XTH5-QRT-F	TGGAGGCAATGAGATTCAGC
	XTH5-QRT-R	TCTCGTCATGCTCCGAGTTT
	ACO1-QRT-F	AGCCAACTCGAGGGCGAGAA
	ACO1-QRT-R	CCTCGTAGTGTGCATTCACC
	BZR1-QRT-F	GAAAGCTCTCTGTGTTGAGG
	BZR1-QRT-R	GGACTAGGAAACAACGAAGA
	BES1-QRT-F	AGCTAGCCCAACTCACCGTC
	BES1-QRT-R	GCTGAGCCACAGGTTTCACAAG

## Sheet: Table S3
Table S3 Growth comparison of PagDET2 overexpression and wild-type controls.
Figure 3	Stem height (cm)	84K	PagDET2-OE1	PagDET2-OE2	PagDET2-OE3
		57.5	77.8	82.3	85.5
		59.7	72.9	79.3	82.7
		63.5	75.1	76.7	80.6
	Internode number	84K	PagDET2-OE1	PagDET2-OE2	PagDET2-OE3
		21	27	24	29
		22	28	27	27
		23	25	26	26
	1/2 plant height diameter (mm)	84K	PagDET2-OE1	PagDET2-OE2	PagDET2-OE3
		4.72	5.39	5.64	5.74
		4.61	5.21	5.47	5.56
		4.48	5.09	5.16	5.26
	Diameter at ground level (mm)	84K	PagDET2-OE1	PagDET2-OE2	PagDET2-OE3
		5.58	6.23	6.31	6.43
		5.36	6.09	6.17	6.31
		5.14	5.86	6.02	6.13
	Fresh weight (mg)	84K	PagDET2-OE1	PagDET2-OE2	PagDET2-OE3
		4278	5299	5477	5788
		4679	5678	5788	6265
		5012	6022	6356	6654
	SPAD value	84K	PagDET2-OE1	PagDET2-OE2	PagDET2-OE3
		26.4	29.8	31.2	32.5
		28.7	31.7	33.4	34.8
		29.8	33.4	34.9	36.2
Figure 4	Cambium cell layers	84K	PagDET2-OE1	PagDET2-OE2	PagDET2-OE3
		6	11	12	13
		7	13	13	16
		8	14	16	17
	Xylem cell layers	84K	PagDET2-OE1	PagDET2-OE2	PagDET2-OE3
		17	29	31	34
		18	31	33	36
		20	32	35	40
	Phloem cell layers	84K	PagDET2-OE1	PagDET2-OE2	PagDET2-OE3
		15	20	23	25
		16	22	24	25
		18	23	26	27
	Vessel width (μm)	84K	PagDET2-OE1	PagDET2-OE2	PagDET2-OE3
		41.4	46.8	51	51.8
		45.3	53.2	58.6	53.2
		40.2	54.6	54.6	52.7
		34.4	55.1	48.9	55.1
		39.3	61.9	46.6	61.9
		43.2	62.5	47.7	62.5
		43.4	45.1	48.7	55.1
		50.7	63.1	50.7	63.1
		36.4	66.3	56.2	70.1
		47.5	62.5	49.7	62.5
		50.7	62.5	53.1	66.4
		51.6	41.6	52.4	56.4
		38.1	38.2	48.2	51.4
		33.2	43.1	47	56.8
		48.2	39.8	48.1	59.6
		44.2	47.2	49.1	52.6
		43.7	52.2	43.1	59.6
		50	59.3	44.6	54.9
		40.8	59.7	47.2	59.7
		51.6	58.6	52.2	51.2
		43.3	59.6	59.3	57.3
		47.1	53.6	59.7	53.6
		31.7	57.1	46.3	57.1
		37.4	61.4	48.1	61.4
		50.2	61.6	51.8	61.6
		46.3	51.7	66.4	51.7
		47.6	71.9	58.2	71.9
		37.4	51.8	59.7	51.8
		45.8	53.7	46.3	53.7
		32.8	63.2	54.1	63.2
Figure S4	Diameter (μm)	84K			PagDET2-OE1	PagDET2-OE2	PagDET2-OE3
	IN3	1970	1620	2110	2331.85	2004	2510
	IN5	2780	2554	3010	3063.45	2810	3240
	IN7	3476.67	3214	3602	3759.56	3480	4106
	IN9	4086.67	3577	3860	4474.41	4310	4772
	Xylem thickness (μm)	84K			PagDET2-OE1	PagDET2-OE2	PagDET2-OE3
	IN5	106.67	69	124	142.35	121	176
	IN7	205	166	234	263.235	231	302
	IN9	365	296	338	434.118	404	482
	Phloem thickness (μm)	84K			PagDET2-OE1	PagDET2-OE2	PagDET2-OE3
	IN3	115.233	104	126	135.912	114	152
	IN5	148.533	132	164	149.838	133	168
	IN7	162.867	154	179	183.515	169	198
	IN9	180.2	167	198	209.382	197	226

## Sheet: Table S4
Table S4 DEGs identiﬁed by comparing DET2-OE-PS with 84K-PS.
gene id	gene name	description	GO_id	GO_term	KO_ID	KO_Description	kegg_id	kegg_term	locus	DET2-PS-R1_count	DET2-PS-R2_count	DET2-PS-R3_count	84K-1-PS-R1_count	84K-1-PS-R2_count	84K-1-PS-R3_count	DET2-PS-R1_FPKM	DET2-PS-R2_FPKM	DET2-PS-R3_FPKM	84K-1-PS-R1_FPKM	84K-1-PS-R2_FPKM	84K-1-PS-R3_FPKM	group4	group1	log2FC	Pvalue	Qvalue	updown
Potri.016G110600	ATDET2,DET2,DWF6	3-oxo-5-alpha-steroid 4-dehydrogenase family protein	-	-	K09591	steroid 5-alpha-reductase[1.3.1.22]	ko01100|ko01100|ko01110|ko00905	Metabolic pathways|Metabolic pathways|Biosynthesis of secondary metabolites|Brassinosteroid biosynthesis	Chr16:11305579-11306422	12777	15071	16254	47	60	80	1754.85	1737.8	1984.66	6.00673	7.30266	10.1291	1825.77	7.81282	7.86844	0	0	UP
Potri.003G063300	-	Kinase-related protein of unknown function (DUF1296)	-	-	-	-	-	-	Chr03:9166931-9175302	1692	2247	1781	325	367	316	50.3296	56.1141	47.0979	8.99561	9.674	8.66523	51.1806	9.11161	2.48982	2.87058e-137	4.32424e-133	UP
Potri.012G048200	-	Calcium-binding EF-hand family protein	-	-	K13448	calcium-binding protein CML[-]	ko04626	Plant-pathogen interaction	Chr12:4492175-4492823	772	853	853	159	175	190	137.888	127.91	135.448	26.4259	27.6991	31.2847	133.749	28.4699	2.23201	1.53983e-97	1.5464e-93	UP
Potri.013G100800	-	Phosphorylase superfamily protein	GO:0003824|GO:0008152|GO:0044237|GO:0071704|GO:0006807|GO:0044238|GO:0006139|GO:0006725|GO:0009116	catalytic activity|metabolic process|cellular metabolic process|organic substance metabolic process|nitrogen compound metabolic process|primary metabolic process|nucleobase-containing compound metabolic process|cellular aromatic compound metabolic process|nucleoside metabolic process	-	-	-	-	Chr13:11295028-11296727	569	675	643	1793	1791	1907	62.5193	62.266	62.8097	183.318	174.387	193.162	62.5317	183.622	-1.55408	1.00768e-68	7.58986e-65	DOWN
Potri.009G072900	ASN1,AT-ASN1,DIN6	glutamine-dependent asparagine synthase 1	GO:0003824|GO:0008152|GO:0044237|GO:0071704|GO:0009058|GO:0006807|GO:0044238|GO:0016874|GO:0016879|GO:0006520|GO:0016884|GO:0008652|GO:0004066|GO:0019752|GO:0006529	catalytic activity|metabolic process|cellular metabolic process|organic substance metabolic process|biosynthetic process|nitrogen compound metabolic process|primary metabolic process|ligase activity|ligase activity, forming carbon-nitrogen bonds|cellular amino acid metabolic process|carbon-nitrogen ligase activity, with glutamine as amido-N-donor|cellular amino acid biosynthetic process|asparagin…	K01953	asparagine synthase (glutamine-hydrolysing)[6.3.5.4]	ko01100|ko01100|ko01110|ko00250	Metabolic pathways|Metabolic pathways|Biosynthesis of secondary metabolites|Alanine, aspartate and glutamate metabolism	Chr09:7110623-7114288	288	368	326	953	1033	967	16.6175	17.8265	16.7227	51.167	52.8191	51.4363	17.0556	51.8075	-1.60292	4.88159e-66	2.94145e-62	DOWN
Potri.009G133900	PEX11D	peroxin 11D	GO:0016020|GO:0005622|GO:0016021|GO:0005737|GO:0043231|GO:0005779|GO:0005778|GO:0007031|GO:0016559|GO:0005777	membrane|intracellular|integral component of membrane|cytoplasm|intracellular membrane-bounded organelle|integral component of peroxisomal membrane|peroxisomal membrane|peroxisome organization|peroxisome fission|peroxisome	-	-	-	-	Chr09:10819239-10820136	0	0	0	95	81	76	0	0	0	21.5727	17.517	17.0978	0	18.7292	#NAME?	3.19676e-56	1.6052e-52	DOWN
Potri.004G020100	-	Polyketide cyclase/dehydrase and lipid transport superfamily protein	GO:0009607|GO:0006950|GO:0006952	response to biotic stimulus|response to stress|defense response	-	-	-	-	Chr04:1351683-1352421	50	78	56	301	313	324	9.87392	12.9318	9.83147	55.3103	54.7743	58.9835	10.8791	56.356	-2.37302	1.35925e-54	5.8502e-51	DOWN
Potri.003G159700	EXGT-A4,XTH5	xyloglucan endotransglucosylase/hydrolase 5	GO:0003824|GO:0008152|GO:0005576|GO:0044237|GO:0048046|GO:0071704|GO:0016740|GO:0016787|GO:0044238|GO:0005975|GO:0016757|GO:0016798|GO:0005618|GO:0004553|GO:0016758|GO:0016762|GO:0006073	catalytic activity|metabolic process|extracellular region|cellular metabolic process|apoplast|organic substance metabolic process|transferase activity|hydrolase activity|primary metabolic process|carbohydrate metabolic process|transferase activity, transferring glycosyl groups|hydrolase activity, acting on glycosyl bonds|cell wall|hydrolase activity, hydrolyzing O-glycosyl compounds|transferase a…	-	-	-	-	Chr03:17131252-17133475	869	1060	1042	2339	2582	2698	54.0415	55.3426	57.609	135.351	142.292	154.675	55.6644	144.106	-1.3723	2.34846e-52	8.84431e-49	DOWN
Potri.013G082800	-	Phosphorylase superfamily protein	GO:0003824|GO:0008152|GO:0044237|GO:0071704|GO:0006807|GO:0044238|GO:0006139|GO:0006725|GO:0009116	catalytic activity|metabolic process|cellular metabolic process|organic substance metabolic process|nitrogen compound metabolic process|primary metabolic process|nucleobase-containing compound metabolic process|cellular aromatic compound metabolic process|nucleoside metabolic process	-	-	-	-	Chr13:7498644-7500286	3321	3676	3466	7700	7950	7364	239.556	222.617	222.27	516.835	508.185	489.689	228.148	504.903	-1.14604	2.76794e-46	9.26583e-43	DOWN
Potri.002G165000	-	Late embryogenesis abundant protein	-	-	-	-	-	-	Chr02:12456399-12457350	1331	1472	1540	578	575	648	253.346	235.229	260.598	102.374	96.9887	113.705	249.724	104.356	1.25883	6.4676e-40	1.94856e-36	UP
Potri.010G090200	ATLACS6,LACS6	long-chain acyl-CoA synthetase 6	GO:0003824|GO:0008152	catalytic activity|metabolic process	K01897	long-chain acyl-CoA synthetase[6.2.1.3]	ko01100|ko01100|ko04146|ko01212|ko00061|ko02024|ko00071|ko04216	Metabolic pathways|Metabolic pathways|Peroxisome|Fatty acid metabolism|Fatty acid biosynthesis|Quorum sensing|Fatty acid degradation|Ferroptosis	Chr10:11389779-11399982	1795	2066	1778	869	916	794	77.0075	74.4122	67.8133	34.6906	34.8242	31.402	73.0777	33.6389	1.1193	5.27426e-36	1.44457e-32	UP
Potri.018G099900	ATCOX6B2,COX6B	cytochrome C oxidase 6B	GO:0003824|GO:0005215|GO:0009055|GO:0016491|GO:0005622|GO:0022857|GO:0004129|GO:0005737|GO:0043231|GO:0005739|GO:0008324|GO:0015078	catalytic activity|transporter activity|electron carrier activity|oxidoreductase activity|intracellular|transmembrane transporter activity|cytochrome-c oxidase activity|cytoplasm|intracellular membrane-bounded organelle|mitochondrion|cation transmembrane transporter activity|hydrogen ion transmembrane transporter activity	K02267	cytochrome c oxidase subunit 6b[-]	ko01100|ko01100|ko00190	Metabolic pathways|Metabolic pathways|Oxidative phosphorylation	Chr18:12799789-12802179	512	594	625	229	228	246	130.44	127.05	141.559	54.2877	51.4747	57.7758	133.016	54.5127	1.28694	6.02886e-34	1.51365e-30	UP
Potri.005G070900	ATDGK2,DGK2	diacylglycerol kinase 2	GO:0003824|GO:0016740|GO:0051716|GO:0016772|GO:0007165|GO:0016301|GO:0035556|GO:0016773|GO:0007186|GO:0004143|GO:0007205	catalytic activity|transferase activity|cellular response to stimulus|transferase activity, transferring phosphorus-containing groups|signal transduction|kinase activity|intracellular signal transduction|phosphotransferase activity, alcohol group as acceptor|G-protein coupled receptor signaling pathway|diacylglycerol kinase activity|protein kinase C-activating G-protein coupled receptor signaling…	K00901	diacylglycerol kinase (ATP)[2.7.1.107]	ko01100|ko01100|ko01110|ko00564|ko00561|ko04070|ko04072	Metabolic pathways|Metabolic pathways|Biosynthesis of secondary metabolites|Glycerophospholipid metabolism|Glycerolipid metabolism|Phosphatidylinositol signaling system|Phospholipase D signaling pathway	Chr05:5086298-5092860	151	151	134	28	28	29	2.8406	2.38481	2.24105	0.49014	0.46678	0.502915	2.48882	0.486612	2.35462	2.01468e-33	4.66909e-30	UP
Potri.013G080300	-	Phosphorylase superfamily protein	GO:0003824|GO:0008152|GO:0044237|GO:0071704|GO:0006807|GO:0044238|GO:0006139|GO:0006725|GO:0009116	catalytic activity|metabolic process|cellular metabolic process|organic substance metabolic process|nitrogen compound metabolic process|primary metabolic process|nucleobase-containing compound metabolic process|cellular aromatic compound metabolic process|nucleoside metabolic process	-	-	-	-	Chr13:7005736-7007309	5526	6478	6015	14170	12182	14627	619.504	609.705	599.492	1478.18	1210.23	1511.67	609.567	1400.03	-1.1996	4.95135e-33	1.06553e-29	DOWN
Potri.001G379800	NTMC2T6.2,NTMC2TYPE6.2	Calcium-dependent lipid-binding (CaLB domain) family protein	GO:0005515	protein binding	-	-	-	-	Chr01:39576583-39580166	1034	1237	1185	562	601	527	77.2792	77.6171	78.7363	39.0842	39.8046	36.3096	77.8775	38.3995	1.02012	2.99356e-32	6.01267e-29	UP
Potri.002G013200	ERD10,LTI29,LTI45	Dehydrin family protein	GO:0006950|GO:0009415	response to stress|response to water	-	-	-	-	Chr02:767115-769114	320	356	340	127	118	106	22.771	21.2681	21.5093	8.40932	7.44097	6.95356	21.8495	7.60128	1.52328	1.17047e-31	2.20399e-28	UP
Potri.005G079000	AST68,SULTR2;1	slufate transporter 2;1	GO:0005215|GO:0016020|GO:0022857|GO:0016021|GO:0055085|GO:0006810|GO:0015116|GO:0006811|GO:0008272|GO:0006820|GO:0008271	transporter activity|membrane|transmembrane transporter activity|integral component of membrane|transmembrane transport|transport|sulfate transmembrane transporter activity|ion transport|sulfate transport|anion transport|secondary active sulfate transmembrane transporter activity	-	-	-	-	Chr05:5820587-5824865	48	62	58	5	2	4	2.92078	3.16737	3.13762	0.283103	0.107834	0.224411	3.07525	0.205116	3.90619	4.93322e-31	8.74282e-28	UP
Potri.001G451600	-	2-oxoglutarate (2OG) and Fe(II)-dependent oxygenase superfamily protein	GO:0003824|GO:0008152|GO:0016491|GO:0055114	catalytic activity|metabolic process|oxidoreductase activity|oxidation-reduction process	-	-	-	-	Chr01:48584424-48585951	139	181	184	44	49	50	15.2583	16.6807	17.9565	4.49431	4.76651	5.0597	16.6318	4.77351	1.80083	1.62471e-27	2.57628e-24	UP
Potri.017G099100	ATRGP2,RGP2	reversibly glycosylated polypeptide 2	GO:0003824|GO:0008152|GO:0044237|GO:0016853|GO:0071704|GO:0009058|GO:0044238|GO:0005975|GO:0016866|GO:0009059|GO:0006073|GO:0030244	catalytic activity|metabolic process|cellular metabolic process|isomerase activity|organic substance metabolic process|biosynthetic process|primary metabolic process|carbohydrate metabolic process|intramolecular transferase activity|macromolecule biosynthetic process|cellular glucan metabolic process|cellulose biosynthetic process	K13379	reversibly glycosylated polypeptide / UDP-arabinopyranose mutase [EC:2.4.1.- <a href=/dbget-bin/www_bget?ec:5.4.99.30>5.4.99.30</a>][-]	ko00520	Amino sugar and nucleotide sugar metabolism	Chr17:11685143-11688113	1716	2064	2215	920	959	1044	147.784	149.233	169.589	73.7259	73.1888	82.8854	155.535	76.6	1.02182	4.26685e-27	6.42759e-24	UP
Potri.006G014500	-	Cystatin/monellin superfamily protein	GO:0030234|GO:0004857|GO:0004866|GO:0004869	enzyme regulator activity|enzyme inhibitor activity|endopeptidase inhibitor activity|cysteine-type endopeptidase inhibitor activity	-	-	-	-	Chr06:992255-992781	288	366	347	136	128	132	63.3484	67.5881	67.8558	27.8358	24.9499	26.7661	66.2641	26.5173	1.3213	1.8135e-26	2.60176e-23	UP
Potri.013G082700	-	Phosphorylase superfamily protein	GO:0003824|GO:0008152|GO:0044237|GO:0071704|GO:0006807|GO:0044238|GO:0006139|GO:0006725|GO:0009116	catalytic activity|metabolic process|cellular metabolic process|organic substance metabolic process|nitrogen compound metabolic process|primary metabolic process|nucleobase-containing compound metabolic process|cellular aromatic compound metabolic process|nucleoside metabolic process	-	-	-	-	Chr13:7453438-7455000	453	481	559	1137	1085	998	50.4431	44.9669	55.3387	117.811	107.066	102.448	50.2496	109.108	-1.11858	1.78157e-25	2.23646e-22	DOWN
Potri.019G057500	ATEXP8,ATEXPA8,ATHEXP ALPHA 1.11,EXP8,EXPA8	expansin A8	-	-	-	-	-	-	Chr19:8915815-8917527	118	161	174	412	394	492	12.8075	14.6709	16.7898	41.6105	37.8962	49.2285	14.756	42.9117	-1.54007	2.08516e-25	2.51287e-22	DOWN
Potri.001G240600	-	Eukaryotic aspartyl protease family protein	GO:0003824|GO:0008152|GO:0071704|GO:0016787|GO:0044238|GO:0008233|GO:0019538|GO:0006508|GO:0004175|GO:0004190	catalytic activity|metabolic process|organic substance metabolic process|hydrolase activity|primary metabolic process|peptidase activity|protein metabolic process|proteolysis|endopeptidase activity|aspartic-type endopeptidase activity	-	-	-	-	Chr01:25156644-25158091	946	1196	1293	550	577	564	75.7315	80.3827	92.0234	40.9705	40.9334	41.623	82.7125	41.1757	1.00631	1.82947e-24	2.11993e-21	UP
Potri.007G142100	-	Integrin-linked protein kinase family	GO:0003824|GO:0008152|GO:0044237|GO:0071704|GO:0016740|GO:0044238|GO:0016772|GO:0019538|GO:0016301|GO:0006796|GO:0016773|GO:0006464|GO:0016310|GO:0004672|GO:0006468	catalytic activity|metabolic process|cellular metabolic process|organic substance metabolic process|transferase activity|primary metabolic process|transferase activity, transferring phosphorus-containing groups|protein metabolic process|kinase activity|phosphate-containing compound metabolic process|phosphotransferase activity, alcohol group as acceptor|cellular protein modification process|phosp…	-	-	-	-	Chr07:15219741-15223498	90	98	88	21	24	19	6.20625	5.67361	5.39492	1.34752	1.46659	1.20781	5.75826	1.34064	2.10271	9.36451e-24	1.04494e-20	UP
Potri.009G142100	ATHCHIB,B-CHI,CHI-B,HCHIB,PR-3,PR3	basic chitinase	GO:0003824|GO:0008152|GO:0044237|GO:0071704|GO:0006807|GO:0016787|GO:0016798|GO:0008061|GO:0016998|GO:0004553|GO:0004568|GO:0006032	catalytic activity|metabolic process|cellular metabolic process|organic substance metabolic process|nitrogen compound metabolic process|hydrolase activity|hydrolase activity, acting on glycosyl bonds|chitin binding|cell wall macromolecule catabolic process|hydrolase activity, hydrolyzing O-glycosyl compounds|chitinase activity|chitin catabolic process	K01183	chitinase[3.2.1.14]	ko01100|ko01100|ko00520	Metabolic pathways|Metabolic pathways|Amino sugar and nucleotide sugar metabolism	Chr09:11300009-11301317	30	42	45	126	135	123	3.51625	4.13292	4.68906	13.742	14.022	13.2902	4.11274	13.6847	-1.7344	4.50641e-22	4.52563e-19	DOWN
Potri.003G174200	-	Serinc-domain containing serine and sphingolipid biosynthesis protein	GO:0016020	membrane	-	-	-	-	Chr03:18324586-18331761	145	135	172	43	47	47	6.22295	4.86418	6.56253	1.71721	1.78749	1.85949	5.88322	1.78806	1.71821	7.79535e-20	6.46998e-17	UP
Potri.005G163000	EXL2	EXORDIUM like 2	-	-	-	-	-	-	Chr05:16758389-16759353	46	36	43	5	3	3	5.5257	3.63058	4.5921	0.558872	0.319374	0.332192	4.5828	0.403479	3.50566	1.53654e-19	1.21824e-16	UP
Potri.006G207300	ILR1	Peptidase M20/M25/M40 family protein	GO:0003824|GO:0008152|GO:0016787	catalytic activity|metabolic process|hydrolase activity	-	-	-	-	Chr06:22281408-22283910	32	28	43	2	2	1	2.64198	1.94084	3.15625	0.153668	0.146314	0.0760788	2.57969	0.125353	4.36313	4.49783e-19	3.38776e-16	UP
Potri.009G068900	CPN10	chaperonin 10	GO:0005622|GO:0006457|GO:0005737	intracellular|protein folding|cytoplasm	-	-	-	-	Chr09:6817955-6820615	0	7	2	41	35	32	0	1.62592	0.491879	10.5547	8.58077	8.16117	0.705934	9.09889	-3.68808	8.09201e-19	5.94624e-16	DOWN
Potri.019G059000	-	-	-	-	-	-	-	-	Chr19:9070757-9071350	53	61	52	10	10	12	7.21094	6.96775	6.28976	1.26599	1.20568	1.50515	6.82282	1.32561	2.36372	1.08458e-18	7.78003e-16	UP
Potri.019G124600	-	Kunitz family trypsin and protease inhibitor protein	GO:0030234|GO:0004857|GO:0004866	enzyme regulator activity|enzyme inhibitor activity|endopeptidase inhibitor activity	-	-	-	-	Chr19:15246505-15247172	50	51	45	123	143	151	8.67663	7.43015	6.94233	19.8612	21.9902	24.156	7.68304	22.0025	-1.51792	9.6431e-18	6.32847e-15	DOWN
Potri.010G230100	-	GDSL-like Lipase/Acylhydrolase superfamily protein	GO:0003824|GO:0016787|GO:0016788	catalytic activity|hydrolase activity|hydrolase activity, acting on ester bonds	-	-	-	-	Chr10:21223971-21229255	32	51	41	5	3	8	0.768139	1.02782	0.874981	0.111682	0.0638219	0.177031	0.890313	0.117512	2.92151	3.16841e-17	1.90915e-14	UP
Potri.003G131300	BEL1	POX (plant homeobox) family protein	GO:0008152|GO:0044237|GO:0071704|GO:0009058|GO:0006807|GO:0044238|GO:0003676|GO:0006139|GO:0006725|GO:0016070|GO:0003677|GO:0010468|GO:0009059|GO:0006351|GO:0006355	metabolic process|cellular metabolic process|organic substance metabolic process|biosynthetic process|nitrogen compound metabolic process|primary metabolic process|nucleic acid binding|nucleobase-containing compound metabolic process|cellular aromatic compound metabolic process|RNA metabolic process|DNA binding|regulation of gene expression|macromolecule biosynthetic process|transcription, DNA-te…	-	-	-	-	Chr03:15076202-15079964	42	40	57	7	6	7	1.13514	0.907609	1.36959	0.176046	0.143714	0.174415	1.13745	0.164725	2.78767	8.50677e-17	4.92869e-14	UP
Potri.008G086500	-	Transmembrane amino acid transporter family protein	-	-	-	-	-	-	Chr08:5421575-5434092	93	108	86	240	236	201	0.635489	0.619578	0.522445	1.52602	1.42907	1.26617	0.592504	1.40709	-1.24782	2.19954e-16	1.22718e-13	DOWN
Potri.002G085100	-	nodulin MtN21 /EamA-like transporter family protein	GO:0005215|GO:0016020|GO:0022857|GO:0016021	transporter activity|membrane|transmembrane transporter activity|integral component of membrane	-	-	-	-	Chr02:5972192-5974511	132	158	159	284	316	323	12.4098	12.4708	13.2893	24.8446	26.3266	27.9938	12.7233	26.3884	-1.05243	3.35104e-16	1.80286e-13	DOWN
Potri.001G113800	ATCCS,CCS	copper chaperone for SOD1	GO:0008152|GO:0044237|GO:0030234|GO:0016531|GO:0055114|GO:0043169|GO:0006810|GO:0016532|GO:0006801|GO:0006811|GO:0046872|GO:0006812|GO:0005507|GO:0030001	metabolic process|cellular metabolic process|enzyme regulator activity|copper chaperone activity|oxidation-reduction process|cation binding|transport|superoxide dismutase copper chaperone activity|superoxide metabolic process|ion transport|metal ion binding|cation transport|copper ion binding|metal ion transport	-	-	-	-	Chr01:9102689-9105099	145	169	185	330	338	331	15.2802	14.9518	17.3319	32.3593	31.5642	32.1557	15.8546	32.0264	-1.01436	6.12689e-16	2.93002e-13	DOWN
Potri.011G089700	-	GDSL-like Lipase/Acylhydrolase superfamily protein	GO:0003824|GO:0016787|GO:0016788	catalytic activity|hydrolase activity|hydrolase activity, acting on ester bonds	-	-	-	-	Chr11:10780968-10783189	231	281	291	126	137	127	12.2662	12.5272	13.7375	6.22577	6.44671	6.21687	12.8436	6.29645	1.02844	2.09772e-15	9.43286e-13	UP
Potri.015G128700	-	Plant invertase/pectin methylesterase inhibitor superfamily protein	GO:0030234|GO:0004857	enzyme regulator activity|enzyme inhibitor activity	-	-	-	-	Chr15:14043016-14043724	116	142	117	49	58	44	18.9656	19.4913	17.0063	7.45459	8.40341	6.63176	18.4877	7.49659	1.30226	1.43918e-14	5.85939e-12	UP
Potri.005G229500	DFR,M318,TT3	dihydroflavonol 4-reductase	GO:0003824|GO:0048037|GO:0050662	catalytic activity|cofactor binding|coenzyme binding	K13082	bifunctional dihydroflavonol 4-reductase/flavanone 4-reductase[1.1.1.234]	ko01100|ko01100|ko01110|ko00941	Metabolic pathways|Metabolic pathways|Biosynthesis of secondary metabolites|Flavonoid biosynthesis	Chr05:23840013-23841903	241	249	258	108	135	116	24.7007	21.4257	23.5085	10.3	12.2615	10.9602	23.2117	11.1739	1.05472	1.80936e-14	7.17267e-12	UP
Potri.019G074400	-	Protein of unknown function (DUF506)	-	-	-	-	-	-	Chr19:10887532-10890696	16	16	30	71	72	75	1.07459	0.902166	1.79125	4.43702	4.28511	4.64347	1.256	4.4552	-1.82665	2.56525e-14	9.90845e-12	DOWN
Potri.001G227300	BGLU17	beta glucosidase 17	GO:0003824|GO:0008152|GO:0071704|GO:0016787|GO:0044238|GO:0005975|GO:0016798|GO:0004553	catalytic activity|metabolic process|organic substance metabolic process|hydrolase activity|primary metabolic process|carbohydrate metabolic process|hydrolase activity, acting on glycosyl bonds|hydrolase activity, hydrolyzing O-glycosyl compounds	K01188	beta-glucosidase[3.2.1.21]	ko01100|ko01100|ko01110|ko00500|ko00940|ko00460	Metabolic pathways|Metabolic pathways|Biosynthesis of secondary metabolites|Starch and sucrose metabolism|Phenylpropanoid biosynthesis|Cyanoamino acid metabolism	Chr01:23899480-23903943	181	202	194	96	80	91	12.4077	11.6254	11.8229	6.12359	4.8598	5.75068	11.952	5.57802	1.09943	6.76487e-14	2.5162e-11	UP
Potri.001G451900	-	2-oxoglutarate (2OG) and Fe(II)-dependent oxygenase superfamily protein	GO:0003824|GO:0008152|GO:0016491|GO:0055114	catalytic activity|metabolic process|oxidoreductase activity|oxidation-reduction process	-	-	-	-	Chr01:48658375-48661345	35	62	55	9	15	6	3.47363	5.16595	4.85271	0.831173	1.31923	0.548914	4.49743	0.899772	2.32147	7.14739e-14	2.62606e-11	UP
Potri.007G021300	ATBSMT1,BSMT1	S-adenosyl-L-methionine-dependent methyltransferases superfamily protein	GO:0003824|GO:0016740|GO:0008168	catalytic activity|transferase activity|methyltransferase activity	K08241	jasmonate O-methyltransferase[2.1.1.141]	ko01110|ko00592	Biosynthesis of secondary metabolites|alpha-Linolenic acid metabolism	Chr07:1610944-1612931	37	36	50	100	110	121	3.36655	2.75001	4.04457	8.46653	8.86942	10.1494	3.38704	9.16177	-1.4356	2.45243e-13	8.30189e-11	DOWN
Potri.009G142300	ATHCHIB,B-CHI,CHI-B,HCHIB,PR-3,PR3	basic chitinase	GO:0003824|GO:0008152|GO:0044237|GO:0071704|GO:0006807|GO:0016787|GO:0016798|GO:0008061|GO:0016998|GO:0004553|GO:0004568|GO:0006032	catalytic activity|metabolic process|cellular metabolic process|organic substance metabolic process|nitrogen compound metabolic process|hydrolase activity|hydrolase activity, acting on glycosyl bonds|chitin binding|cell wall macromolecule catabolic process|hydrolase activity, hydrolyzing O-glycosyl compounds|chitinase activity|chitin catabolic process	K01183	chitinase[3.2.1.14]	ko01100|ko01100|ko00520	Metabolic pathways|Metabolic pathways|Amino sugar and nucleotide sugar metabolism	Chr09:11309429-11310967	137	164	179	346	346	278	13.1791	13.2451	15.3086	30.9718	29.4958	24.6536	13.9109	28.3738	-1.02834	2.95254e-13	9.77518e-11	DOWN
Potri.006G033500	-	nodulin MtN21 /EamA-like transporter family protein	GO:0005215|GO:0016020|GO:0022857|GO:0016021	transporter activity|membrane|transmembrane transporter activity|integral component of membrane	-	-	-	-	Chr06:2243137-2245109	89	97	110	186	234	250	7.78622	7.12455	8.5555	15.1417	18.1414	20.1626	7.82209	17.8152	-1.18749	3.13087e-13	1.02529e-10	DOWN
Potri.005G248600	-	-	GO:0016020|GO:0005622|GO:0005737|GO:0043231|GO:0031966|GO:0005743|GO:0005739|GO:0005740|GO:0005747	membrane|intracellular|cytoplasm|intracellular membrane-bounded organelle|mitochondrial membrane|mitochondrial inner membrane|mitochondrion|mitochondrial envelope|mitochondrial respiratory chain complex I	-	-	-	-	Chr05:25188058-25188734	102	115	99	199	234	211	33.4951	31.7048	28.9021	60.8074	68.0946	63.875	31.3673	64.259	-1.03464	6.40761e-13	1.96988e-10	DOWN
Potri.014G143200	-	Peroxidase superfamily protein	GO:0016209|GO:0003824|GO:0008152|GO:0016491|GO:0004601|GO:0006950|GO:0055114|GO:0006979|GO:0020037	antioxidant activity|catalytic activity|metabolic process|oxidoreductase activity|peroxidase activity|response to stress|oxidation-reduction process|response to oxidative stress|heme binding	K00430	peroxidase[1.11.1.7]	ko01100|ko01100|ko01110|ko00940	Metabolic pathways|Metabolic pathways|Biosynthesis of secondary metabolites|Phenylpropanoid biosynthesis	Chr14:10928198-10929749	18	10	20	54	61	64	1.80027	0.839676	1.77833	5.02555	5.40647	5.90093	1.47276	5.44432	-1.88623	6.78275e-13	2.06415e-10	DOWN
Potri.008G210900	ATEBP,EBP,ERF72,RAP2.3	ethylene-responsive element binding protein	GO:0008152|GO:0044237|GO:0003700|GO:0071704|GO:0009058|GO:0006807|GO:0044238|GO:0006139|GO:0006725|GO:0016070|GO:0010468|GO:0009059|GO:0006351|GO:0006355	metabolic process|cellular metabolic process|transcription factor activity, sequence-specific DNA binding|organic substance metabolic process|biosynthetic process|nitrogen compound metabolic process|primary metabolic process|nucleobase-containing compound metabolic process|cellular aromatic compound metabolic process|RNA metabolic process|regulation of gene expression|macromolecule biosynthetic p…	-	-	-	-	Chr08:16395451-16396491	83	128	94	45	30	28	11.2661	14.5865	11.3433	5.68376	3.60857	3.50369	12.3986	4.26534	1.53945	1.69566e-12	4.77448e-10	UP
Potri.005G014300	ATNAS3,NAS3	nicotianamine synthase 3	GO:0003824|GO:0008152|GO:0044237|GO:0071704|GO:0009058|GO:0006807|GO:0016740|GO:0016765|GO:0030410|GO:0009308|GO:0030418|GO:0019752	catalytic activity|metabolic process|cellular metabolic process|organic substance metabolic process|biosynthetic process|nitrogen compound metabolic process|transferase activity|transferase activity, transferring alkyl or aryl (other than methyl) groups|nicotianamine synthase activity|amine metabolic process|nicotianamine biosynthetic process|carboxylic acid metabolic process	-	-	-	-	Chr05:1109846-1110879	87	104	112	192	204	214	9.75336	9.78838	11.1626	20.029	20.2666	22.1165	10.2348	20.804	-1.02338	2.14243e-12	5.86792e-10	DOWN
Potri.013G082600	-	Phosphorylase superfamily protein	GO:0003824|GO:0008152|GO:0044237|GO:0071704|GO:0006807|GO:0044238|GO:0006139|GO:0006725|GO:0009116	catalytic activity|metabolic process|cellular metabolic process|organic substance metabolic process|nitrogen compound metabolic process|primary metabolic process|nucleobase-containing compound metabolic process|cellular aromatic compound metabolic process|nucleoside metabolic process	-	-	-	-	Chr13:7443397-7444093	4	0	11	56	35	35	0.853931	0	2.08765	11.1241	6.62126	6.88806	0.980526	8.21113	-3.06595	3.22642e-12	8.60135e-10	DOWN
Potri.011G052400	ATGSL01,ATGSL1,GSL01,GSL1	glucan synthase-like 1	GO:0003824|GO:0008152|GO:0016020|GO:0044237|GO:0071704|GO:0009058|GO:0016740|GO:0044238|GO:0005886|GO:0005975|GO:0016757|GO:0000148|GO:0016758|GO:0009059|GO:0006073|GO:0003843|GO:0006075	catalytic activity|metabolic process|membrane|cellular metabolic process|organic substance metabolic process|biosynthetic process|transferase activity|primary metabolic process|plasma membrane|carbohydrate metabolic process|transferase activity, transferring glycosyl groups|1,3-beta-D-glucan synthase complex|transferase activity, transferring hexosyl groups|macromolecule biosynthetic process|cell…	-	-	-	-	Chr11:4484559-4489895	226	285	257	1123	456	877	4.9087	5.19693	4.96254	22.6965	8.77684	17.56	5.02272	16.3445	-1.70226	4.50431e-12	1.14039e-09	DOWN
Potri.011G164600	-	-	-	-	-	-	-	-	Chr11:18147305-18147751	0	0	0	13	14	13	0	0	0	6.4916	6.65782	6.43148	0	6.52697	#NAME?	6.35649e-12	1.54442e-09	DOWN
Potri.013G048800	-	Leucine-rich receptor-like protein kinase family protein	GO:0003824|GO:0008152|GO:0044237|GO:0005515|GO:0071704|GO:0016740|GO:0044238|GO:0016772|GO:0000166|GO:0001882|GO:0019538|GO:0016301|GO:0032549|GO:0006796|GO:0016773|GO:0006464|GO:0016310|GO:0005524|GO:0004672|GO:0006468	catalytic activity|metabolic process|cellular metabolic process|protein binding|organic substance metabolic process|transferase activity|primary metabolic process|transferase activity, transferring phosphorus-containing groups|nucleotide binding|nucleoside binding|protein metabolic process|kinase activity|ribonucleoside binding|phosphate-containing compound metabolic process|phosphotransferase ac…	-	-	-	-	Chr13:3560179-3563721	65	79	86	163	181	148	2.2539	2.29981	2.65114	5.25932	5.56177	4.73093	2.40162	5.18401	-1.11006	7.14967e-12	1.70956e-09	DOWN
Potri.T174200	ATCM2,CM2	chorismate mutase 2	GO:0003824|GO:0008152|GO:0044237|GO:0016853|GO:0071704|GO:0009058|GO:0006807|GO:0044238|GO:0016866|GO:0006725|GO:0006520|GO:0009072|GO:0004106|GO:0008652|GO:0019752|GO:0009073	catalytic activity|metabolic process|cellular metabolic process|isomerase activity|organic substance metabolic process|biosynthetic process|nitrogen compound metabolic process|primary metabolic process|intramolecular transferase activity|cellular aromatic compound metabolic process|cellular amino acid metabolic process|aromatic amino acid family metabolic process|chorismate mutase activity|cellul…	K01850	chorismate mutase[5.4.99.5]	ko01100|ko01100|ko01110|ko01130|ko01230|ko00400	Metabolic pathways|Metabolic pathways|Biosynthesis of secondary metabolites|Biosynthesis of antibiotics|Biosynthesis of amino acids|Phenylalanine, tyrosine and tryptophan biosynthesis	scaffold_1296:2356-5340	105	115	94	39	43	49	8.50558	7.82095	6.7695	2.93968	3.08676	3.65914	7.69868	3.22853	1.25373	1.45442e-11	3.29463e-09	UP
Potri.014G115000	XET,XTH33	xyloglucan:xyloglucosyl transferase 33	GO:0003824|GO:0008152|GO:0005576|GO:0044237|GO:0048046|GO:0071704|GO:0016740|GO:0016787|GO:0044238|GO:0005975|GO:0016757|GO:0016798|GO:0005618|GO:0004553|GO:0016758|GO:0016762|GO:0006073	catalytic activity|metabolic process|extracellular region|cellular metabolic process|apoplast|organic substance metabolic process|transferase activity|hydrolase activity|primary metabolic process|carbohydrate metabolic process|transferase activity, transferring glycosyl groups|hydrolase activity, acting on glycosyl bonds|cell wall|hydrolase activity, hydrolyzing O-glycosyl compounds|transferase a…	-	-	-	-	Chr14:8968037-8969555	22	13	18	59	55	61	2.19845	1.09061	1.59913	5.48614	4.87054	5.6195	1.6294	5.32539	-1.70855	2.18065e-11	4.79551e-09	DOWN
Potri.009G069000	-	-	-	-	-	-	-	-	Chr09:6822186-6824477	0	4	4	25	20	23	0	0.844316	0.894131	5.84937	4.45657	5.33152	0.579482	5.21249	-3.16914	2.70379e-11	5.77728e-09	DOWN
Potri.011G148600	-	nodulin MtN21 /EamA-like transporter family protein	GO:0005215|GO:0016020|GO:0022857|GO:0016021	transporter activity|membrane|transmembrane transporter activity|integral component of membrane	-	-	-	-	Chr11:16744749-16746517	17	23	18	65	60	51	1.78493	2.02754	1.68025	6.3507	5.58283	4.93658	1.8309	5.62337	-1.61888	3.61327e-11	7.35545e-09	DOWN
Potri.015G117350	AGO2	Argonaute family protein	GO:0003676	nucleic acid binding	-	-	-	-	Chr15:13254772-13255917	146	179	174	65	73	95	14.768	15.2009	15.647	6.11795	6.54352	8.85855	15.2053	7.17334	1.08386	6.52269e-11	1.25971e-08	UP
Potri.006G238600	TINY2	Integrase-type DNA-binding superfamily protein	GO:0008152|GO:0044237|GO:0003700|GO:0071704|GO:0009058|GO:0006807|GO:0044238|GO:0006139|GO:0006725|GO:0016070|GO:0010468|GO:0009059|GO:0006351|GO:0006355	metabolic process|cellular metabolic process|transcription factor activity, sequence-specific DNA binding|organic substance metabolic process|biosynthetic process|nitrogen compound metabolic process|primary metabolic process|nucleobase-containing compound metabolic process|cellular aromatic compound metabolic process|RNA metabolic process|regulation of gene expression|macromolecule biosynthetic p…	-	-	-	-	Chr06:24790819-24792267	58	73	79	31	24	24	4.63991	4.90291	5.61861	2.30767	1.7014	1.76994	5.05381	1.92634	1.39151	1.26261e-10	2.29156e-08	UP
Potri.010G142800	-	Glycosyl hydrolase superfamily protein	GO:0003824|GO:0008152|GO:0071704|GO:0016787|GO:0044238|GO:0005975|GO:0016798|GO:0004553	catalytic activity|metabolic process|organic substance metabolic process|hydrolase activity|primary metabolic process|carbohydrate metabolic process|hydrolase activity, acting on glycosyl bonds|hydrolase activity, hydrolyzing O-glycosyl compounds	-	-	-	-	Chr10:15420940-15423137	3	3	6	25	22	27	0.103245	0.0866752	0.183578	0.800641	0.670993	0.856655	0.1245	0.776096	-2.64009	1.4484e-10	2.59746e-08	DOWN
Potri.006G248000	-	2-oxoglutarate (2OG) and Fe(II)-dependent oxygenase superfamily protein	GO:0003824|GO:0008152|GO:0016491|GO:0055114	catalytic activity|metabolic process|oxidoreductase activity|oxidation-reduction process	-	-	-	-	Chr06:25482590-25485307	30	49	48	88	106	100	3.11889	4.27678	4.43649	8.5131	9.76563	9.58405	3.94405	9.28759	-1.23563	1.50755e-10	2.68239e-08	DOWN
Potri.012G141800	-	PAR1 protein	-	-	-	-	-	-	Chr12:15510214-15511165	10	11	8	36	38	35	1.6303	1.50561	1.15948	5.46149	5.49021	5.2605	1.4318	5.40407	-1.91622	1.52223e-10	2.68239e-08	DOWN
Potri.001G440700	-	FAD-binding Berberine family protein	GO:0003824|GO:0008152|GO:0016491|GO:0048037|GO:0055114|GO:0000166|GO:0050662|GO:0050660	catalytic activity|metabolic process|oxidoreductase activity|cofactor binding|oxidation-reduction process|nucleotide binding|coenzyme binding|flavin adenine dinucleotide binding	-	-	-	-	Chr01:47236913-47238496	12	11	12	0	0	0	0.87819	0.675815	0.780745	0	0	0	0.77825	0	Inf	1.9684e-10	3.40828e-08	UP
Potri.008G093200	ATNRP1,NRP1	nodulin-related protein 1	-	-	-	-	-	-	Chr08:5842957-5843460	14	8	25	0	0	0	3.2199	1.54478	5.11188	0	0	0	3.29219	0	Inf	2.5154e-10	4.17183e-08	UP
Potri.005G239100	GASA1	GAST1 protein homolog 1	-	-	-	-	-	-	Chr05:24572197-24573396	111	91	107	38	52	33	15.3544	10.5681	13.1585	4.89125	6.37426	4.20819	13.027	5.1579	1.33665	4.32102e-10	6.85178e-08	UP
Potri.001G192800	-	-	-	-	-	-	-	-	Chr01:17557263-17558090	55	56	39	19	14	11	9.2802	7.93286	5.85034	2.98316	2.09329	1.71099	7.6878	2.26248	1.76467	8.31661e-10	1.29156e-07	UP
Potri.001G048900	ABCG40,ATABCG40,ATPDR12,PDR12	pleiotropic drug resistance 12	GO:0003824|GO:0016020|GO:0016787|GO:0016817|GO:0000166|GO:0001882|GO:0032549|GO:0016818|GO:0016462|GO:0005524|GO:0016887	catalytic activity|membrane|hydrolase activity|hydrolase activity, acting on acid anhydrides|nucleotide binding|nucleoside binding|ribonucleoside binding|hydrolase activity, acting on acid anhydrides, in phosphorus-containing anhydrides|pyrophosphatase activity|ATP binding|ATPase activity	-	-	-	-	Chr01:3680273-3687468	55	66	57	112	123	121	1.39233	1.40272	1.28285	2.63829	2.75933	2.82383	1.3593	2.74048	-1.01156	8.79619e-10	1.35903e-07	DOWN
Potri.009G141800	ATHCHIB,B-CHI,CHI-B,HCHIB,PR-3,PR3	basic chitinase	GO:0003824|GO:0008152|GO:0044237|GO:0071704|GO:0006807|GO:0016787|GO:0016798|GO:0008061|GO:0016998|GO:0004553|GO:0004568|GO:0006032	catalytic activity|metabolic process|cellular metabolic process|organic substance metabolic process|nitrogen compound metabolic process|hydrolase activity|hydrolase activity, acting on glycosyl bonds|chitin binding|cell wall macromolecule catabolic process|hydrolase activity, hydrolyzing O-glycosyl compounds|chitinase activity|chitin catabolic process	K01183	chitinase[3.2.1.14]	ko01100|ko01100|ko00520	Metabolic pathways|Metabolic pathways|Amino sugar and nucleotide sugar metabolism	Chr09:11283289-11284670	48	52	65	131	119	105	5.36039	4.87538	6.45334	13.6129	11.7766	10.8098	5.56304	12.0664	-1.11705	1.3878e-09	2.02969e-07	DOWN
Potri.018G046900	-	RING/U-box superfamily protein	GO:0005515|GO:0043169|GO:0046872|GO:0008270	protein binding|cation binding|metal ion binding|zinc ion binding	-	-	-	-	Chr18:4392774-4393790	106	97	87	36	42	46	12.082	9.28223	8.81588	3.81821	4.24227	4.8335	10.0601	4.29799	1.2269	1.48339e-09	2.12818e-07	UP
Potri.015G003900	-	Heavy metal transport/detoxification superfamily protein	GO:0043169|GO:0006810|GO:0006811|GO:0046872|GO:0006812|GO:0030001	cation binding|transport|ion transport|metal ion binding|cation transport|metal ion transport	-	-	-	-	Chr15:268735-271061	65	72	53	143	170	114	5.2216	4.85587	3.78508	10.6892	12.1019	8.44229	4.62085	10.4111	-1.1719	1.76273e-09	2.51695e-07	DOWN
Potri.014G179400	NRT1.5	nitrate transporter 1.5	GO:0005215|GO:0016020|GO:0016021|GO:0055085|GO:0006810	transporter activity|membrane|integral component of membrane|transmembrane transport|transport	-	-	-	-	Chr14:14812128-14814791	3	13	14	34	39	59	0.164723	0.599292	0.683466	1.73727	1.89777	2.98667	0.482494	2.20724	-2.19366	2.64685e-09	3.69187e-07	DOWN
Potri.002G192600	ATGPAT3,GPAT3	glycerol-3-phosphate acyltransferase 3	GO:0003824|GO:0008152|GO:0016740|GO:0016746	catalytic activity|metabolic process|transferase activity|transferase activity, transferring acyl groups	K13508	glycerol-3-phosphate acyltransferase[2.3.1.15]	ko01100|ko01100|ko01110|ko00564|ko00561	Metabolic pathways|Metabolic pathways|Biosynthesis of secondary metabolites|Glycerophospholipid metabolism|Glycerolipid metabolism	Chr02:15362451-15364375	10	5	9	25	48	39	0.701662	0.294581	0.561438	1.6323	2.98473	2.52276	0.519227	2.37993	-2.19648	2.72529e-09	3.78376e-07	DOWN
Potri.017G082701	MIF2	mini zinc finger 2	-	-	-	-	-	-	Chr17:9830787-9831244	8	3	7	33	22	35	2.02482	0.637385	1.57511	7.77196	4.93429	8.16641	1.41244	6.95755	-2.30039	2.85808e-09	3.93188e-07	DOWN
Potri.005G087200	ABR1	Integrase-type DNA-binding superfamily protein	GO:0008152|GO:0044237|GO:0003700|GO:0071704|GO:0009058|GO:0006807|GO:0044238|GO:0006139|GO:0006725|GO:0016070|GO:0010468|GO:0009059|GO:0006351|GO:0006355	metabolic process|cellular metabolic process|transcription factor activity, sequence-specific DNA binding|organic substance metabolic process|biosynthetic process|nitrogen compound metabolic process|primary metabolic process|nucleobase-containing compound metabolic process|cellular aromatic compound metabolic process|RNA metabolic process|regulation of gene expression|macromolecule biosynthetic p…	-	-	-	-	Chr05:6521516-6523192	11	9	11	0	0	0	0.892927	0.613359	0.793832	0	0	0	0.766706	0	Inf	2.88845e-09	3.9556e-07	UP
Potri.017G102900	-	disease resistance protein (TIR-NBS-LRR class), putative	GO:0005515|GO:0051716|GO:0000166|GO:0001882|GO:0007165|GO:0032549|GO:0043531	protein binding|cellular response to stimulus|nucleotide binding|nucleoside binding|signal transduction|ribonucleoside binding|ADP binding	-	-	-	-	Chr17:11966965-11976581	12	19	14	46	44	42	0.200874	0.267012	0.208346	0.716497	0.65268	0.64811	0.225411	0.672429	-1.57683	3.02215e-09	4.10142e-07	DOWN
Potri.T154300	-	-	-	-	-	-	-	-	scaffold_608:382-1256	21	33	31	59	83	71	4.10496	5.41583	5.38732	10.7317	14.3779	12.7947	4.96937	12.6348	-1.34627	3.01969e-09	4.10142e-07	DOWN
Potri.013G134101	-	Acyl-CoA N-acyltransferases (NAT) superfamily protein	-	-	-	-	-	-	Chr13:14486504-14487443	2	2	1	14	19	15	0.199979	0.167916	0.0889617	1.30295	1.68396	1.38305	0.152286	1.45665	-3.2578	3.92275e-09	5.18353e-07	DOWN
Potri.007G080800	-	-	-	-	-	-	-	-	Chr07:10453157-10455410	102	113	90	35	37	57	21.8958	20.3649	17.1758	6.99131	7.03846	11.2798	19.8122	8.43653	1.23167	4.00966e-09	5.27525e-07	UP
Potri.018G151700	-	Major facilitator superfamily protein	GO:0016020|GO:0016021|GO:0055085|GO:0006810	membrane|integral component of membrane|transmembrane transport|transport	-	-	-	-	Chr18:16893804-16896717	8	11	18	35	57	41	0.617012	0.712237	1.23419	2.51185	3.89571	2.91507	0.85448	3.10754	-1.86265	4.24905e-09	5.54179e-07	DOWN
Potri.002G197200	ATBXL2,BXL2	beta-xylosidase 2	GO:0003824|GO:0008152|GO:0071704|GO:0016787|GO:0044238|GO:0005975|GO:0016798|GO:0004553	catalytic activity|metabolic process|organic substance metabolic process|hydrolase activity|primary metabolic process|carbohydrate metabolic process|hydrolase activity, acting on glycosyl bonds|hydrolase activity, hydrolyzing O-glycosyl compounds	-	-	-	-	Chr02:15787688-15793097	50	61	49	105	103	110	2.38224	2.44	2.07549	4.65507	4.34879	4.83142	2.29924	4.61176	-1.00416	8.7362e-09	1.0743e-06	DOWN
Potri.004G182000	ATHCHIB,B-CHI,CHI-B,HCHIB,PR-3,PR3	basic chitinase	GO:0003824|GO:0008152|GO:0044237|GO:0071704|GO:0006807|GO:0016787|GO:0016798|GO:0008061|GO:0016998|GO:0004553|GO:0004568|GO:0006032	catalytic activity|metabolic process|cellular metabolic process|organic substance metabolic process|nitrogen compound metabolic process|hydrolase activity|hydrolase activity, acting on glycosyl bonds|chitin binding|cell wall macromolecule catabolic process|hydrolase activity, hydrolyzing O-glycosyl compounds|chitinase activity|chitin catabolic process	K01183	chitinase[3.2.1.14]	ko01100|ko01100|ko00520	Metabolic pathways|Metabolic pathways|Amino sugar and nucleotide sugar metabolism	Chr04:19854568-19855939	15	19	19	41	57	49	1.59668	1.69794	1.79807	4.061	5.37672	4.80829	1.69756	4.74867	-1.48406	9.14994e-09	1.11607e-06	DOWN
Potri.004G016400	-	MATE efflux family protein	GO:0005215|GO:0016020|GO:0022857|GO:0055085|GO:0015238|GO:0006810|GO:0006855|GO:0015297	transporter activity|membrane|transmembrane transporter activity|transmembrane transport|drug transmembrane transporter activity|transport|drug transmembrane transport|antiporter activity	-	-	-	-	Chr04:1106746-1110203	18	27	28	49	74	72	1.3818	1.74015	1.91091	3.5002	5.03413	5.09541	1.67762	4.54325	-1.43731	9.25442e-09	1.12426e-06	DOWN
Potri.010G011400	-	MATE efflux family protein	GO:0005215|GO:0016020|GO:0022857|GO:0055085|GO:0015238|GO:0006810|GO:0006855|GO:0015297	transporter activity|membrane|transmembrane transporter activity|transmembrane transport|drug transmembrane transporter activity|transport|drug transmembrane transport|antiporter activity	-	-	-	-	Chr10:1480960-1482718	7	8	8	29	25	30	0.492065	0.472146	0.499933	1.89694	1.55737	1.94415	0.488048	1.79949	-1.88249	3.70927e-08	3.89383e-06	DOWN
Potri.004G055900	SAG12	senescence-associated gene 12	GO:0003824|GO:0008152|GO:0071704|GO:0016787|GO:0044238|GO:0008233|GO:0019538|GO:0006508|GO:0008234	catalytic activity|metabolic process|organic substance metabolic process|hydrolase activity|primary metabolic process|peptidase activity|protein metabolic process|proteolysis|cysteine-type peptidase activity	-	-	-	-	Chr04:4428438-4431291	0	0	0	15	14	4	0	0	0	1.49532	1.3291	0.395104	0	1.07318	#NAME?	4.69987e-08	4.7837e-06	DOWN
Potri.002G184100	FIP1	FH interacting protein 1	-	-	-	-	-	-	Chr02:14378998-14381146	30	24	38	74	65	97	3.75142	2.51964	4.22447	8.61056	7.20287	11.1819	3.49851	8.99845	-1.36294	5.46336e-08	5.50502e-06	DOWN
Potri.011G107500	-	-	-	-	-	-	-	-	Chr11:13071077-13071912	70	57	60	107	135	144	20.439	13.9728	15.575	29.0716	34.9314	38.761	16.6622	34.2547	-1.03972	6.15444e-08	6.09937e-06	DOWN
Potri.003G061300	-	Ran BP2/NZF zinc finger-like superfamily protein	GO:0043169|GO:0046872|GO:0008270	cation binding|metal ion binding|zinc ion binding	-	-	-	-	Chr03:8887304-8888385	42	277	313	34	39	34	6.82836	37.8085	45.24	5.14358	5.61878	5.09577	29.959	5.28604	2.50273	6.25399e-08	6.15753e-06	UP
Potri.004G000400	ATKTI1,KTI1	kunitz trypsin inhibitor 1	GO:0030234|GO:0004857|GO:0004866	enzyme regulator activity|enzyme inhibitor activity|endopeptidase inhibitor activity	-	-	-	-	Chr04:75005-75670	3	1	2	17	12	17	0.522118	0.146107	0.309455	2.75328	1.85085	2.72778	0.325893	2.44397	-2.90675	7.73659e-08	7.3762e-06	DOWN
Potri.007G008600	-	-	-	-	-	-	-	-	Chr07:676583-680113	50	22	46	1270	1267	32	1.64146	0.606339	1.34253	38.7957	36.8595	0.968431	1.19678	25.5412	-4.4156	8.29574e-08	7.85956e-06	DOWN
Potri.014G160900	-	Nucleic acid-binding, OB-fold-like protein	GO:0008152|GO:0044237|GO:0071704|GO:0009058|GO:0006807|GO:0044238|GO:0003676|GO:0006413|GO:0019538|GO:0003723|GO:0009059|GO:0006412|GO:0043043|GO:0003743	metabolic process|cellular metabolic process|organic substance metabolic process|biosynthetic process|nitrogen compound metabolic process|primary metabolic process|nucleic acid binding|translational initiation|protein metabolic process|RNA binding|macromolecule biosynthetic process|translation|peptide biosynthetic process|translation initiation factor activity	K03236	translation initiation factor 1A[-]	ko03013	RNA transport	Chr14:12674075-12675059	6	6	6	10	8	1316	0.36488	0.306377	0.324392	0.565909	0.431173	73.783	0.331883	24.9267	-6.23087	8.70985e-08	8.14939e-06	DOWN
Potri.017G070000	-	-	-	-	-	-	-	-	Chr17:7997927-7998247	66	87	77	41	35	37	23.8336	26.3761	24.7205	13.777	11.2004	12.3173	24.9767	12.4316	1.00657	8.7554e-08	8.16665e-06	UP
Potri.015G089201	-	RPM1-interacting protein 4 (RIN4) family protein	-	-	-	-	-	-	Chr15:11160691-11162104	40	38	35	11	10	17	11.1728	8.91114	8.69127	2.85918	2.47528	4.37759	9.59173	3.23735	1.56698	9.3534e-08	8.64414e-06	UP
Potri.008G149200	-	NAD(P)-binding Rossmann-fold superfamily protein	-	-	-	-	-	-	Chr08:10053967-10060027	23	26	37	64	66	62	2.74861	2.60858	3.9309	7.11687	6.9894	6.83034	3.09603	6.97887	-1.17257	1.1725e-07	1.04512e-05	DOWN
Potri.003G190300	-	Mitochondrial transcription termination factor family protein	GO:0008152|GO:0044237|GO:0005622|GO:0071704|GO:0009058|GO:0006807|GO:0044238|GO:0003676|GO:0006139|GO:0005737|GO:0006725|GO:0043231|GO:0016070|GO:0003677|GO:0005739|GO:0010468|GO:0009059|GO:0006351|GO:0006355|GO:0003690	metabolic process|cellular metabolic process|intracellular|organic substance metabolic process|biosynthetic process|nitrogen compound metabolic process|primary metabolic process|nucleic acid binding|nucleobase-containing compound metabolic process|cytoplasm|cellular aromatic compound metabolic process|intracellular membrane-bounded organelle|RNA metabolic process|DNA binding|mitochondrion|regulat…	-	-	-	-	Chr03:19503074-19504222	6	7	9	26	26	26	0.605275	0.592917	0.80722	2.44081	2.32452	2.4181	0.668471	2.39448	-1.84078	1.26491e-07	1.11945e-05	DOWN
Potri.T123900	-	-	-	-	-	-	-	-	scaffold_218:27514-30643	82	0	100	1	0	0	4.56548	0	4.94978	0.0517833	0	0	3.17175	0.0172611	7.52161	1.42627e-07	1.24915e-05	UP
Potri.013G137900	-	ATPase, F0 complex, subunit B/B\', bacterial/chloroplast	GO:0005215|GO:0008152|GO:0016020|GO:0044237|GO:0005622|GO:0022857|GO:0071704|GO:0009058|GO:0006807|GO:0044238|GO:0045263|GO:0055085|GO:0006139|GO:0006725|GO:0033177|GO:0006810|GO:0009116|GO:0034220|GO:1901137|GO:0006796|GO:0006811|GO:0009165|GO:0006812|GO:0015992|GO:0008324|GO:0006164|GO:0046034|GO:0015078|GO:0015986|GO:0006754	transporter activity|metabolic process|membrane|cellular metabolic process|intracellular|transmembrane transporter activity|organic substance metabolic process|biosynthetic process|nitrogen compound metabolic process|primary metabolic process|proton-transporting ATP synthase complex, coupling factor F(o)|transmembrane transport|nucleobase-containing compound metabolic process|cellular aromatic co…	K02109	F-type H+-transporting ATPase subunit b[-]	ko01100|ko01100|ko00190|ko00195	Metabolic pathways|Metabolic pathways|Oxidative phosphorylation|Photosynthesis	Chr13:14719426-14719914	26	31	24	54	61	65	6.16336	6.16945	5.05784	11.9113	12.8141	14.2045	5.79688	12.9766	-1.16257	1.54271e-07	1.33559e-05	DOWN
Potri.010G073166	-	2-oxoglutarate (2OG) and Fe(II)-dependent oxygenase superfamily protein	GO:0003824|GO:0008152|GO:0016491|GO:0055114	catalytic activity|metabolic process|oxidoreductase activity|oxidation-reduction process	-	-	-	-	Chr10:9980200-9983451	0	0	2	11	14	8	0	0	0.157086	0.90439	1.0961	0.651587	0.0523621	0.884027	-4.0775	1.67333e-07	1.42929e-05	DOWN
Potri.011G100600	CYP72A15	cytochrome P450, family 72, subfamily A, polypeptide 15	GO:0003824|GO:0008152|GO:0016491|GO:0016705|GO:0055114|GO:0043169|GO:0020037|GO:0046872|GO:0005506	catalytic activity|metabolic process|oxidoreductase activity|oxidoreductase activity, acting on paired donors, with incorporation or reduction of molecular oxygen|oxidation-reduction process|cation binding|heme binding|metal ion binding|iron ion binding	-	-	-	-	Chr11:12274794-12278101	12	19	8	33	47	37	0.946295	1.25786	0.560809	2.42147	3.28436	2.68969	0.921656	2.79851	-1.60236	1.67466e-07	1.42929e-05	DOWN
Potri.003G018700	-	-	-	-	-	-	-	-	Chr03:2260062-2261191	39	66	95	19	28	16	4.4717	6.35317	9.68374	2.02714	2.845	1.69116	6.8362	2.18777	1.64374	1.75764e-07	1.47917e-05	UP
Potri.018G113700	-	-	-	-	-	-	-	-	Chr18:13908910-13909474	47	52	42	16	17	23	9.6427	8.9569	7.66066	3.05464	3.09077	4.35015	8.75342	3.49852	1.3231	1.75622e-07	1.47917e-05	UP
Potri.012G139400	RPL24A	ribosomal protein L24	-	-	K02896	large subunit ribosomal protein L24e[-]	ko03010	Ribosome	Chr12:15385217-15386850	152	185	184	60	118	54	26.9413	27.5292	28.994	9.89582	18.5342	8.82347	27.8215	12.4178	1.16379	1.91168e-07	1.59986e-05	UP
Potri.004G033100	ATM4,ATMYB102,MYB102	MYB-like 102	-	-	-	-	-	-	Chr04:2417287-2418726	0	0	0	8	7	9	0	0	0	0.696428	0.580343	0.776188	0	0.68432	#NAME?	2.20841e-07	1.80802e-05	DOWN
Potri.004G197600	-	Late embryogenesis abundant (LEA) hydroxyproline-rich glycoprotein family	-	-	-	-	-	-	Chr04:21021491-21022403	73	84	65	34	43	28	9.26836	8.95379	7.33687	4.01683	4.83807	3.27727	8.51967	4.04406	1.07499	2.36268e-07	1.91868e-05	UP
Potri.003G193500	ATST2A,ST2A	sulfotransferase 2A	GO:0003824|GO:0016740|GO:0008146	catalytic activity|transferase activity|sulfotransferase activity	-	-	-	-	Chr03:19735584-19736651	38	43	40	12	14	20	4.12447	3.91832	3.85972	1.21196	1.34653	2.00119	3.9675	1.51989	1.38426	2.43456e-07	1.96114e-05	UP
Potri.016G131800	-	Protein of unknown function (DUF567)	-	-	-	-	-	-	Chr16:13503003-13504168	6	8	10	0	0	0	0.848123	0.949475	1.25683	0	0	0	1.01814	0	Inf	2.47487e-07	1.97779e-05	UP
Potri.015G144800	-	PAR1 protein	-	-	-	-	-	-	Chr15:15030160-15031082	2	3	4	14	19	16	0.333491	0.420032	0.593086	2.17284	2.80822	2.46009	0.448869	2.48038	-2.46619	3.48467e-07	2.63123e-05	DOWN
Potri.006G069400	SHN1,WIN1	Integrase-type DNA-binding superfamily protein	GO:0008152|GO:0044237|GO:0003700|GO:0071704|GO:0009058|GO:0006807|GO:0044238|GO:0006139|GO:0006725|GO:0016070|GO:0010468|GO:0009059|GO:0006351|GO:0006355	metabolic process|cellular metabolic process|transcription factor activity, sequence-specific DNA binding|organic substance metabolic process|biosynthetic process|nitrogen compound metabolic process|primary metabolic process|nucleobase-containing compound metabolic process|cellular aromatic compound metabolic process|RNA metabolic process|regulation of gene expression|macromolecule biosynthetic p…	-	-	-	-	Chr06:5201762-5202549	81	83	114	42	38	51	14.9038	12.8214	18.648	7.19086	6.19609	8.65077	15.4577	7.34591	1.07332	3.82537e-07	2.85982e-05	UP
Potri.002G094500	-	Haloacid dehalogenase-like hydrolase (HAD) superfamily protein	GO:0003824|GO:0008152|GO:0044237|GO:0071704|GO:0009058|GO:0044238|GO:0005975|GO:0005991|GO:0009312|GO:0005992	catalytic activity|metabolic process|cellular metabolic process|organic substance metabolic process|biosynthetic process|primary metabolic process|carbohydrate metabolic process|trehalose metabolic process|oligosaccharide biosynthetic process|trehalose biosynthetic process	K01087	trehalose 6-phosphate phosphatase[3.1.3.12]	ko01100|ko01100|ko00500	Metabolic pathways|Metabolic pathways|Starch and sucrose metabolism	Chr02:6794074-6796721	25	44	34	66	77	67	1.86123	2.75021	2.25041	4.57225	5.08011	4.59842	2.28728	4.75026	-1.05437	5.50171e-07	3.95598e-05	DOWN
Potri.001G347600	-	DNAJ heat shock N-terminal domain-containing protein	-	-	-	-	-	-	Chr01:35343078-35345182	17	15	12	30	52	43	1.3007	0.963585	0.816303	2.13589	3.52583	3.03307	1.02686	2.89826	-1.49694	6.34677e-07	4.5098e-05	DOWN
Potri.013G080500	-	Phosphorylase superfamily protein	GO:0003824|GO:0008152|GO:0044237|GO:0071704|GO:0006807|GO:0044238|GO:0006139|GO:0006725|GO:0009116	catalytic activity|metabolic process|cellular metabolic process|organic substance metabolic process|nitrogen compound metabolic process|primary metabolic process|nucleobase-containing compound metabolic process|cellular aromatic compound metabolic process|nucleoside metabolic process	-	-	-	-	Chr13:7051571-7053149	407	465	703	814	948	1372	45.6276	43.7655	70.0653	84.9144	94.18	141.794	53.1528	106.963	-1.00889	6.45488e-07	4.57583e-05	DOWN
Potri.005G176100	-	nodulin MtN21 /EamA-like transporter family protein	GO:0005215|GO:0016020|GO:0022857|GO:0016021	transporter activity|membrane|transmembrane transporter activity|integral component of membrane	-	-	-	-	Chr05:19222700-19225660	0	4	0	16	13	9	0	0.170865	0	0.757626	0.586232	0.422167	0.0569549	0.588675	-3.36958	6.65917e-07	4.69854e-05	DOWN
Potri.002G020101	-	DEA(D/H)-box RNA helicase family protein	-	-	-	-	-	-	Chr02:1193098-1198311	9	11	4	0	0	0	0.247526	0.253972	0.0977923	0	0	0	0.199763	0	Inf	6.76448e-07	4.75059e-05	UP
Potri.001G233100	ATMYO5,ATXIF,XIF	myosin-like protein XIF	GO:0003824|GO:0005622|GO:0005515|GO:0016787|GO:0016817|GO:0000166|GO:0001882|GO:0016459|GO:0032549|GO:0016818|GO:0005856|GO:0016462|GO:0015629|GO:0005524|GO:0003774	catalytic activity|intracellular|protein binding|hydrolase activity|hydrolase activity, acting on acid anhydrides|nucleotide binding|nucleoside binding|myosin complex|ribonucleoside binding|hydrolase activity, acting on acid anhydrides, in phosphorus-containing anhydrides|cytoskeleton|pyrophosphatase activity|actin cytoskeleton|ATP binding|motor activity	-	-	-	-	Chr01:24501852-24514417	33	44	29	71	70	71	0.733096	0.820636	0.572745	1.46767	1.37805	1.45405	0.708826	1.43326	-1.0158	7.36482e-07	5.10086e-05	DOWN
Potri.003G033400	AtHsp90-7,AtHsp90.7,HSP90.7,SHD	Chaperone protein htpG family protein	GO:0005515|GO:0006457|GO:0006950|GO:0051082|GO:0000166|GO:0001882|GO:0032549|GO:0005524	protein binding|protein folding|response to stress|unfolded protein binding|nucleotide binding|nucleoside binding|ribonucleoside binding|ATP binding	K09487	heat shock protein 90kDa beta[-]	ko04141|ko04626|ko04151|ko05418|ko04657	Protein processing in endoplasmic reticulum|Plant-pathogen interaction|PI3K-Akt signaling pathway|Fluid shear stress and atherosclerosis|IL-17 signaling pathway	Chr03:4204372-4210704	8	12	4	0	0	0	2.0337	2.56096	0.903935	0	0	0	1.83287	0	Inf	7.80704e-07	5.33357e-05	UP
Potri.T078350	-	Major facilitator superfamily protein	GO:0005215|GO:0016020|GO:0022857|GO:0016021|GO:0055085|GO:0006810	transporter activity|membrane|transmembrane transporter activity|integral component of membrane|transmembrane transport|transport	-	-	-	-	scaffold_662:400-5781	7	5	6	15	29	29	0.839974	0.503776	0.640053	1.67488	3.0838	3.20804	0.661268	2.65557	-2.00572	8.02557e-07	5.4439e-05	DOWN
Potri.001G153200	-	Acyl-CoA N-acyltransferase with RING/FYVE/PHD-type zinc finger protein	-	-	-	-	-	-	Chr01:12646580-12649892	2	2	3	18	11	15	0.0752764	0.0632071	0.100423	0.630561	0.367006	0.520607	0.0796357	0.506058	-2.66782	8.37615e-07	5.64557e-05	DOWN
Potri.012G134000	-	Integrase-type DNA-binding superfamily protein	GO:0008152|GO:0044237|GO:0003700|GO:0071704|GO:0009058|GO:0006807|GO:0044238|GO:0006139|GO:0006725|GO:0016070|GO:0010468|GO:0009059|GO:0006351|GO:0006355	metabolic process|cellular metabolic process|transcription factor activity, sequence-specific DNA binding|organic substance metabolic process|biosynthetic process|nitrogen compound metabolic process|primary metabolic process|nucleobase-containing compound metabolic process|cellular aromatic compound metabolic process|RNA metabolic process|regulation of gene expression|macromolecule biosynthetic p…	-	-	-	-	Chr12:15093390-15094323	21	23	18	7	5	4	2.60626	2.39657	1.98607	0.808417	0.549915	0.457711	2.32963	0.605347	1.94427	9.96274e-07	6.568e-05	UP
Potri.016G021600	ATUGT85A1,UGT85A1	UDP-Glycosyltransferase superfamily protein	GO:0003824|GO:0008152|GO:0016740|GO:0016757|GO:0016758	catalytic activity|metabolic process|transferase activity|transferase activity, transferring glycosyl groups|transferase activity, transferring hexosyl groups	-	-	-	-	Chr16:1196056-1198477	0	0	4	11	12	12	0	0	0.261379	0.752416	0.781652	0.81318	0.0871263	0.782416	-3.16676	1.07757e-06	7.0576e-05	DOWN
Potri.001G083500	ATMYC2,JAI1,JIN1,MYC2,RD22BP1,ZBF1	Basic helix-loop-helix (bHLH) DNA-binding family protein	GO:0005515|GO:0046983	protein binding|protein dimerization activity	K13422	transcription factor MYC2[-]	ko04075|ko04016	Plant hormone signal transduction|MAPK signaling pathway - plant	Chr01:6590738-6592153	25	38	33	80	60	64	2.04656	2.61167	2.40168	6.094	4.35271	4.82993	2.3533	5.09222	-1.11361	1.08228e-06	7.07308e-05	DOWN
Potri.001G158400	-	Bifunctional inhibitor/lipid-transfer protein/seed storage 2S albumin superfamily protein	-	-	-	-	-	-	Chr01:13185451-13185916	72	66	92	33	39	39	17.9103	13.7834	20.3456	7.63853	8.59698	8.94334	17.3464	8.39295	1.04739	1.16455e-06	7.48093e-05	UP
Potri.008G139200	-	Transcription factor TFIIE, alpha subunit	-	-	-	-	-	-	Chr08:9277530-9278663	9	8	5	0	0	0	2.76011	2.05971	1.36323	0	0	0	2.06102	0	Inf	1.22667e-06	7.83215e-05	UP
Potri.014G113500	PGP21	P-glycoprotein 21	GO:0003824|GO:0005215|GO:0016020|GO:0022857|GO:0016787|GO:0016021|GO:0016817|GO:0000166|GO:0001882|GO:0055085|GO:0006810|GO:0032549|GO:0016820|GO:0016818|GO:0016462|GO:0005524|GO:0042626|GO:0016887|GO:0042623	catalytic activity|transporter activity|membrane|transmembrane transporter activity|hydrolase activity|integral component of membrane|hydrolase activity, acting on acid anhydrides|nucleotide binding|nucleoside binding|transmembrane transport|transport|ribonucleoside binding|hydrolase activity, acting on acid anhydrides, catalyzing transmembrane movement of substances|hydrolase activity, acting on…	K05658	ATP-binding cassette, subfamily B (MDR/TAP), member 1[3.6.3.44]	ko02010	ABC transporters	Chr14:8865200-8872282	0	4	0	9	12	15	0	0.0674458	0	0.168222	0.213596	0.27776	0.0224819	0.219859	-3.28974	1.27107e-06	8.09617e-05	DOWN
Potri.005G231600	-	TRAM, LAG1 and CLN8 (TLC) lipid-sensing domain containing protein	GO:0016020|GO:0016021	membrane|integral component of membrane	-	-	-	-	Chr05:24019254-24020788	46	61	58	30	25	24	5.32698	5.93059	5.9712	3.23264	2.56554	2.56209	5.74292	2.78675	1.0432	2.10089e-06	0.000126674	UP
Potri.T151701	-	Plant protein of unknown function (DUF828) with plant pleckstrin homology-like region	-	-	-	-	-	-	scaffold_545:20660-22021	38	44	59	12	18	25	4.92172	4.78444	6.7936	1.44623	2.06598	2.98501	5.49992	2.16574	1.34455	2.12039e-06	0.000127257	UP
Potri.007G055300	CYCD5;1	cyclin d5;1	GO:0005622|GO:0043231|GO:0005634	intracellular|intracellular membrane-bounded organelle|nucleus	-	-	-	-	Chr07:5809515-5811111	46	58	65	30	25	25	4.57709	4.84506	5.74984	2.77757	2.20438	2.29321	5.05733	2.42505	1.06036	2.34491e-06	0.000138524	UP
Potri.003G114200	-	copper ion binding	-	-	-	-	-	-	Chr03:13774449-13775727	99	11	139	9	12	9	4.48808	0.418651	5.60212	0.379668	0.482075	0.376104	3.50295	0.412615	3.0857	2.76624e-06	0.000159352	UP
Potri.001G430800	-	Di-glucose binding protein with Kinesin motor domain	GO:0003824|GO:0005622|GO:0005515|GO:0016787|GO:0007017|GO:0016817|GO:0000166|GO:0001882|GO:0005875|GO:0032549|GO:0016818|GO:0005871|GO:0015631|GO:0007018|GO:0008017|GO:0005856|GO:0016462|GO:0005524|GO:0003774|GO:0003777	catalytic activity|intracellular|protein binding|hydrolase activity|microtubule-based process|hydrolase activity, acting on acid anhydrides|nucleotide binding|nucleoside binding|microtubule associated complex|ribonucleoside binding|hydrolase activity, acting on acid anhydrides, in phosphorus-containing anhydrides|kinesin complex|tubulin binding|microtubule-based movement|microtubule binding|cytos…	-	-	-	-	Chr01:46122699-46127256	27	27	27	10	11	7	1.12422	0.943833	0.999456	0.387437	0.405895	0.268703	1.0225	0.354011	1.53024	2.85956e-06	0.000163168	UP
Potri.019G111700	-	RING/FYVE/PHD zinc finger superfamily protein	GO:0043169|GO:0046872|GO:0008270	cation binding|metal ion binding|zinc ion binding	-	-	-	-	Chr19:14080094-14083566	0	0	0	4	12	6	0	0	0	0.482122	1.37728	0.716348	0	0.858583	#NAME?	3.10971e-06	0.000174794	DOWN
Potri.019G010900	ATKTI1,KTI1	kunitz trypsin inhibitor 1	GO:0030234|GO:0004857|GO:0004866	enzyme regulator activity|enzyme inhibitor activity|endopeptidase inhibitor activity	-	-	-	-	Chr19:1333780-1334391	0	0	0	4	6	13	0	0	0	0.705064	1.00718	2.26993	0	1.32739	#NAME?	3.3323e-06	0.000186263	DOWN
Potri.006G134300	LKR,LKR/SDH,SDH	lysine-ketoglutarate reductase/saccharopine dehydrogenase bifunctional enzyme	GO:0003824|GO:0008152|GO:0016491|GO:0055114	catalytic activity|metabolic process|oxidoreductase activity|oxidation-reduction process	K14157	alpha-aminoadipic semialdehyde synthase[1.5.1.9]	ko01100|ko01100|ko01110|ko01130|ko00310	Metabolic pathways|Metabolic pathways|Biosynthesis of secondary metabolites|Biosynthesis of antibiotics|Lysine degradation	Chr06:11058590-11070779	20	21	16	52	47	35	0.492443	0.434086	0.350232	1.19137	1.02549	0.794439	0.425587	1.00377	-1.2379	4.11408e-06	0.000224139	DOWN
Potri.005G017300	ATNAS3,NAS3	nicotianamine synthase 3	GO:0003824|GO:0008152|GO:0044237|GO:0071704|GO:0009058|GO:0006807|GO:0016740|GO:0016765|GO:0030410|GO:0009308|GO:0030418|GO:0019752	catalytic activity|metabolic process|cellular metabolic process|organic substance metabolic process|biosynthetic process|nitrogen compound metabolic process|transferase activity|transferase activity, transferring alkyl or aryl (other than methyl) groups|nicotianamine synthase activity|amine metabolic process|nicotianamine biosynthetic process|carboxylic acid metabolic process	-	-	-	-	Chr05:1398998-1400041	21	23	16	42	41	59	2.33165	2.14406	1.5794	4.33931	4.03411	6.03914	2.01837	4.80419	-1.2511	4.38892e-06	0.000235111	DOWN
Potri.T105200	emb2734	ARM repeat superfamily protein	-	-	-	-	-	-	scaffold_156:957-12110	8	10	8	1	1	0	0.0587872	0.0616916	0.0522592	0.00683441	0.00651481	0	0.0575793	0.00444974	3.69376	4.99877e-06	0.00025966	UP
Potri.019G026400	-	RmlC-like cupins superfamily protein	-	-	-	-	-	-	Chr19:3013873-3021966	9	11	15	2	0	3	0.0422638	0.0433643	0.062618	0.00873975	0	0.0129857	0.0494153	0.00724183	2.77053	5.043e-06	0.000261507	UP
Potri.009G136500	APP,ATPARP1,PARP1,PP	poly(ADP-ribose) polymerase	GO:0003824|GO:0016740|GO:0016757|GO:0016763|GO:0003950	catalytic activity|transferase activity|transferase activity, transferring glycosyl groups|transferase activity, transferring pentosyl groups|NAD+ ADP-ribosyltransferase activity	-	-	-	-	Chr09:10974374-10975887	2	6	4	12	24	17	0.0466538	0.117543	0.0829699	0.260542	0.496242	0.365681	0.082389	0.374155	-2.18311	5.16907e-06	0.000267584	DOWN
Potri.001G122600	-	-	-	-	-	-	-	-	Chr01:9919275-9920790	4	5	4	17	16	18	0.755186	0.792585	0.671326	2.98646	2.67692	3.13276	0.739699	2.93205	-1.9869	5.71391e-06	0.000292273	DOWN
Potri.004G060100	-	Leucine-rich repeat protein kinase family protein	GO:0003824|GO:0008152|GO:0044237|GO:0005515|GO:0071704|GO:0016740|GO:0044238|GO:0016772|GO:0000166|GO:0001882|GO:0019538|GO:0016301|GO:0032549|GO:0006796|GO:0016773|GO:0006464|GO:0016310|GO:0005524|GO:0004672|GO:0006468	catalytic activity|metabolic process|cellular metabolic process|protein binding|organic substance metabolic process|transferase activity|primary metabolic process|transferase activity, transferring phosphorus-containing groups|nucleotide binding|nucleoside binding|protein metabolic process|kinase activity|ribonucleoside binding|phosphate-containing compound metabolic process|phosphotransferase ac…	-	-	-	-	Chr04:4826364-4829818	12	17	14	31	33	41	0.449452	0.534555	0.46617	1.08039	1.09529	1.41562	0.483392	1.1971	-1.30828	6.17719e-06	0.000311736	DOWN
Potri.013G142232	-	RNA polymerase subunit beta	GO:0003824|GO:0008152|GO:0044237|GO:0071704|GO:0009058|GO:0006807|GO:0016740|GO:0044238|GO:0016772|GO:0003676|GO:0001882|GO:0006139|GO:0006725|GO:0016070|GO:0003677|GO:0016779|GO:0032549|GO:0009059|GO:0006351|GO:0003899	catalytic activity|metabolic process|cellular metabolic process|organic substance metabolic process|biosynthetic process|nitrogen compound metabolic process|transferase activity|primary metabolic process|transferase activity, transferring phosphorus-containing groups|nucleic acid binding|nucleoside binding|nucleobase-containing compound metabolic process|cellular aromatic compound metabolic proce…	K03043	DNA-directed RNA polymerase subunit beta[2.7.7.6]	ko01100|ko01100|ko00230|ko00240|ko03020	Metabolic pathways|Metabolic pathways|Purine metabolism|Pyrimidine metabolism|RNA polymerase	Chr13:14872051-14873682	9	8	20	27	41	88	0.639291	0.477065	1.26292	1.7845	2.58065	5.76215	0.793092	3.37577	-2.08965	6.38463e-06	0.000317803	DOWN
Potri.001G096900	-	Disease resistance-responsive (dirigent-like protein) family protein	-	-	-	-	-	-	Chr01:7624960-7625562	3	3	5	20	15	13	0.576667	0.484116	0.854562	3.57752	2.55532	2.30381	0.638449	2.81222	-2.13907	6.51321e-06	0.000321688	DOWN
Potri.004G020000	-	Polyketide cyclase/dehydrase and lipid transport superfamily protein	GO:0009607|GO:0006950|GO:0006952	response to biotic stimulus|response to stress|defense response	-	-	-	-	Chr04:1330631-1331339	0	0	0	8	6	5	0	0	0	1.54915	1.10663	0.959276	0	1.20502	#NAME?	6.51209e-06	0.000321688	DOWN
Potri.006G089000	APX1B,APX2	ascorbate peroxidase 2	GO:0016209|GO:0003824|GO:0008152|GO:0016491|GO:0004601|GO:0006950|GO:0055114|GO:0006979|GO:0020037	antioxidant activity|catalytic activity|metabolic process|oxidoreductase activity|peroxidase activity|response to stress|oxidation-reduction process|response to oxidative stress|heme binding	K00434	L-ascorbate peroxidase[1.11.1.11]	ko00480|ko00053	Glutathione metabolism|Ascorbate and aldarate metabolism	Chr06:6772464-6773349	25	0	26	0	0	0	3.36187	0	3.10833	0	0	0	2.15673	0	Inf	6.63692e-06	0.000327156	UP
Potri.019G101400	-	Ankyrin repeat family protein	-	-	-	-	-	-	Chr19:13059593-13062468	33	45	33	22	11	7	1.81122	2.07357	1.61022	1.12358	0.535043	0.354199	1.83167	0.67094	1.4489	6.87751e-06	0.000336373	UP
Potri.008G000500	GCN2	protein kinase family protein	GO:0003824|GO:0008152|GO:0044237|GO:0071704|GO:0016740|GO:0044238|GO:0016772|GO:0000166|GO:0001882|GO:0019538|GO:0016301|GO:0032549|GO:0006796|GO:0016773|GO:0006464|GO:0016310|GO:0005524|GO:0004672|GO:0006468	catalytic activity|metabolic process|cellular metabolic process|organic substance metabolic process|transferase activity|primary metabolic process|transferase activity, transferring phosphorus-containing groups|nucleotide binding|nucleoside binding|protein metabolic process|kinase activity|ribonucleoside binding|phosphate-containing compound metabolic process|phosphotransferase activity, alcohol …	K16195	eukaryotic translation initiation factor 2-alpha kinase 2[2.7.11.1]	ko04141|ko05165|ko04217|ko05167	Protein processing in endoplasmic reticulum|Human papillomavirus infection|Necroptosis|Kaposi's sarcoma-associated herpesvirus infection	Chr08:13503-16773	37	37	41	18	12	19	0.811539	0.681327	0.799486	0.36736	0.233238	0.384169	0.764117	0.328256	1.21897	7.02197e-06	0.000342882	UP
Potri.015G029400	1-Oct,AtOCT1	organic cation/carnitine transporter1	GO:0016020|GO:0016021|GO:0055085|GO:0006810	membrane|integral component of membrane|transmembrane transport|transport	-	-	-	-	Chr15:2387365-2389364	12	11	14	31	27	55	0.819713	0.630814	0.850204	1.97042	1.63437	3.46338	0.766911	2.35606	-1.61925	7.0454e-06	0.000342919	DOWN
Potri.011G049900	-	Aluminium induced protein with YGL and LRDR motifs	-	-	-	-	-	-	Chr11:4276919-4278017	44	65	70	35	24	25	5.66711	7.02861	8.01541	4.19478	2.73926	2.96843	6.90371	3.30082	1.06455	7.24718e-06	0.000351274	UP
Potri.001G393300	-	ABC-2 type transporter family protein	GO:0003824|GO:0016020|GO:0016787|GO:0016817|GO:0000166|GO:0001882|GO:0032549|GO:0016818|GO:0016462|GO:0005524|GO:0016887	catalytic activity|membrane|hydrolase activity|hydrolase activity, acting on acid anhydrides|nucleotide binding|nucleoside binding|ribonucleoside binding|hydrolase activity, acting on acid anhydrides, in phosphorus-containing anhydrides|pyrophosphatase activity|ATP binding|ATPase activity	-	-	-	-	Chr01:41242823-41245025	19	30	24	8	12	4	0.999758	1.32526	1.12269	0.391681	0.559539	0.194055	1.14924	0.381758	1.58994	8.51257e-06	0.000399481	UP
Potri.009G024500	-	-	-	-	-	-	-	-	Chr09:3591963-3592585	24	23	33	11	4	11	4.46566	3.59294	5.45871	1.90459	0.659469	1.88675	4.50577	1.4836	1.60267	8.55965e-06	0.000401066	UP
Potri.003G176300	ATNCED6,NCED6	nine-cis-epoxycarotenoid dioxygenase 6	-	-	K09840	9-cis-epoxycarotenoid dioxygenase[1.13.11.51]	ko01100|ko01100|ko01110|ko00906	Metabolic pathways|Metabolic pathways|Biosynthesis of secondary metabolites|Carotenoid biosynthesis	Chr03:18470095-18471693	24	38	38	13	15	12	1.7399	2.31277	2.44908	0.876914	0.96364	0.801992	2.16725	0.880849	1.2989	9.43901e-06	0.00043125	UP
Potri.009G081800	LRR XI-23,RLK7	Leucine-rich receptor-like protein kinase family protein	GO:0003824|GO:0008152|GO:0044237|GO:0005515|GO:0071704|GO:0016740|GO:0044238|GO:0016772|GO:0000166|GO:0001882|GO:0019538|GO:0016301|GO:0032549|GO:0006796|GO:0016773|GO:0006464|GO:0016310|GO:0005524|GO:0004672|GO:0006468	catalytic activity|metabolic process|cellular metabolic process|protein binding|organic substance metabolic process|transferase activity|primary metabolic process|transferase activity, transferring phosphorus-containing groups|nucleotide binding|nucleoside binding|protein metabolic process|kinase activity|ribonucleoside binding|phosphate-containing compound metabolic process|phosphotransferase ac…	-	-	-	-	Chr09:7762798-7765953	24	25	18	53	51	40	0.910077	0.795883	0.606801	1.87007	1.71372	1.39828	0.770921	1.66069	-1.10713	9.81908e-06	0.000447548	DOWN
Potri.003G142800	ABIL2	ABL interactor-like protein 2	-	-	-	-	-	-	Chr03:15938174-15941778	9	5	13	28	23	27	0.272693	0.127195	0.350154	0.7894	0.617532	0.754107	0.250014	0.720346	-1.52668	1.1247e-05	0.000502745	DOWN
Potri.012G108500	-	Integrase-type DNA-binding superfamily protein	GO:0008152|GO:0044237|GO:0003700|GO:0071704|GO:0009058|GO:0006807|GO:0044238|GO:0006139|GO:0006725|GO:0016070|GO:0010468|GO:0009059|GO:0006351|GO:0006355	metabolic process|cellular metabolic process|transcription factor activity, sequence-specific DNA binding|organic substance metabolic process|biosynthetic process|nitrogen compound metabolic process|primary metabolic process|nucleobase-containing compound metabolic process|cellular aromatic compound metabolic process|RNA metabolic process|regulation of gene expression|macromolecule biosynthetic p…	-	-	-	-	Chr12:13160085-13161804	0	0	7	18	14	11	0	0	0.718524	1.93376	1.43236	1.17077	0.239508	1.5123	-2.65859	1.1906e-05	0.00052807	DOWN
Potri.016G052400	-	-	-	-	-	-	-	-	Chr16:3344502-3344793	32	36	35	15	14	16	12.7032	11.9983	12.3523	5.54087	4.92496	5.85536	12.3513	5.4404	1.18288	1.19187e-05	0.00052807	UP
Potri.010G206200	-	RING/U-box superfamily protein	GO:0005515|GO:0043169|GO:0046872|GO:0008270	protein binding|cation binding|metal ion binding|zinc ion binding	-	-	-	-	Chr10:19678123-19678632	8	10	12	1	2	1	1.81837	1.9082	2.4249	0.211398	0.402793	0.20944	2.05049	0.274544	2.90086	1.21803e-05	0.000536502	UP
Potri.018G019300	ATCM2,CM2	chorismate mutase 2	GO:0003824|GO:0008152|GO:0044237|GO:0016853|GO:0071704|GO:0009058|GO:0006807|GO:0044238|GO:0016866|GO:0006725|GO:0006520|GO:0009072|GO:0004106|GO:0008652|GO:0019752|GO:0009073	catalytic activity|metabolic process|cellular metabolic process|isomerase activity|organic substance metabolic process|biosynthetic process|nitrogen compound metabolic process|primary metabolic process|intramolecular transferase activity|cellular aromatic compound metabolic process|cellular amino acid metabolic process|aromatic amino acid family metabolic process|chorismate mutase activity|cellul…	K01850	chorismate mutase[5.4.99.5]	ko01100|ko01100|ko01110|ko01130|ko01230|ko00400	Metabolic pathways|Metabolic pathways|Biosynthesis of secondary metabolites|Biosynthesis of antibiotics|Biosynthesis of amino acids|Phenylalanine, tyrosine and tryptophan biosynthesis	Chr18:1463957-1466926	47	64	55	22	22	36	3.85299	4.40484	4.00846	1.67822	1.59824	2.72067	4.08876	1.99904	1.03236	1.27141e-05	0.000553387	UP
Potri.001G098000	-	-	-	-	-	-	-	-	Chr01:7721775-7723570	214	54	178	47	40	49	8.24141	1.74593	6.09429	1.68428	1.3651	1.73961	5.36055	1.59633	1.74762	1.29699e-05	0.000563052	UP
Potri.006G186301	-	AP2/B3 transcription factor family protein	GO:0008152|GO:0044237|GO:0003700|GO:0071704|GO:0009058|GO:0006807|GO:0044238|GO:0003676|GO:0006139|GO:0006725|GO:0016070|GO:0003677|GO:0010468|GO:0009059|GO:0006351|GO:0006355	metabolic process|cellular metabolic process|transcription factor activity, sequence-specific DNA binding|organic substance metabolic process|biosynthetic process|nitrogen compound metabolic process|primary metabolic process|nucleic acid binding|nucleobase-containing compound metabolic process|cellular aromatic compound metabolic process|RNA metabolic process|DNA binding|regulation of gene expres…	-	-	-	-	Chr06:20077748-20083377	9	13	13	29	29	29	0.442461	0.536517	0.568147	1.32657	1.26334	1.31423	0.515708	1.30138	-1.33542	1.33841e-05	0.000578529	DOWN
Potri.T029200	-	-	GO:0030234|GO:0004857|GO:0004866	enzyme regulator activity|enzyme inhibitor activity|endopeptidase inhibitor activity	-	-	-	-	scaffold_31:85565-85992	13	24	14	45	40	33	3.52105	5.45726	3.37102	11.341	9.60038	8.23941	4.11644	9.72691	-1.24058	1.50261e-05	0.000633154	DOWN
Potri.005G043700	-	Leucine-rich repeat transmembrane protein kinase protein	-	-	-	-	-	-	Chr05:3213085-3215905	60	44	57	27	28	20	3.7353	2.29972	3.15477	1.56408	1.54474	1.14783	3.06326	1.41888	1.11032	1.69673e-05	0.000700262	UP
Potri.001G054800	CYP78A10	cytochrome P450, family 78, subfamily A, polypeptide 10	GO:0003824|GO:0008152|GO:0016491|GO:0016705|GO:0055114|GO:0043169|GO:0020037|GO:0046872|GO:0005506	catalytic activity|metabolic process|oxidoreductase activity|oxidoreductase activity, acting on paired donors, with incorporation or reduction of molecular oxygen|oxidation-reduction process|cation binding|heme binding|metal ion binding|iron ion binding	-	-	-	-	Chr01:4151331-4154500	10	25	29	63	49	41	0.698701	1.46656	1.80144	4.0961	3.03402	2.64096	1.32223	3.25702	-1.30058	1.84753e-05	0.000754232	DOWN
Potri.008G118600	-	Aluminium activated malate transporter family protein	GO:0006810|GO:0006811|GO:0006820|GO:0015740|GO:0015743	transport|ion transport|anion transport|C4-dicarboxylate transport|malate transport	-	-	-	-	Chr08:7649010-7652792	17	19	20	5	8	4	0.589635	0.55328	0.616723	0.161374	0.245905	0.127918	0.586546	0.178399	1.71714	1.88529e-05	0.000766532	UP
Potri.004G070800	UGT88A1	UDP-glucosyl transferase 88A1	GO:0003824|GO:0008152|GO:0016740|GO:0016757|GO:0016758	catalytic activity|metabolic process|transferase activity|transferase activity, transferring glycosyl groups|transferase activity, transferring hexosyl groups	-	-	-	-	Chr04:5915088-5916543	5	6	6	0	0	0	0.52935	0.533292	0.56465	0	0	0	0.542431	0	Inf	1.99958e-05	0.000803244	UP
Potri.011G158400	-	FAD-binding Berberine family protein	GO:0003824|GO:0008152|GO:0016491|GO:0048037|GO:0055114|GO:0000166|GO:0050662|GO:0050660	catalytic activity|metabolic process|oxidoreductase activity|cofactor binding|oxidation-reduction process|nucleotide binding|coenzyme binding|flavin adenine dinucleotide binding	-	-	-	-	Chr11:17557444-17559051	20	28	21	38	54	53	1.4418	1.69461	1.34589	2.54905	3.44966	3.52222	1.4941	3.17364	-1.08686	2.03565e-05	0.000812318	DOWN
Potri.002G131650	-	-	-	-	-	-	-	-	Chr02:9851146-9851852	11	9	7	1	1	1	1.80353	1.23886	1.02037	0.152493	0.145362	0.151081	1.35425	0.149646	3.17788	2.04251e-05	0.000813977	UP
Potri.002G118366	-	-	-	-	-	-	-	-	Chr02:8860441-8861858	40	31	37	18	14	14	14.5809	9.48698	11.9905	6.10534	4.52229	4.70445	12.0194	5.11069	1.23378	2.06311e-05	0.000819726	UP
Potri.018G031700	ATBOR4,BOR4	HCO3- transporter family	GO:0005215|GO:0016020|GO:0022857|GO:0016021|GO:0006810|GO:0006811|GO:0015297|GO:0006820|GO:0005452	transporter activity|membrane|transmembrane transporter activity|integral component of membrane|transport|ion transport|antiporter activity|anion transport|inorganic anion exchanger activity	-	-	-	-	Chr18:2452287-2456821	6	5	6	0	0	0	0.182679	0.12783	0.162409	0	0	0	0.157639	0	Inf	2.12461e-05	0.00083783	UP
Potri.015G046200	AtMYB116,MYB116	myb domain protein 116	-	-	-	-	-	-	Chr15:4593685-4595356	2	6	4	13	16	17	0.211861	0.533779	0.376777	1.28171	1.50241	1.6606	0.374139	1.48157	-1.98548	2.37838e-05	0.000924591	DOWN
Potri.010G241200	-	Ribosomal S17 family protein	GO:0005198|GO:0008152|GO:0044237|GO:0005622|GO:0071704|GO:0009058|GO:0003735|GO:0006807|GO:0044238|GO:0005737|GO:0019538|GO:0005840|GO:0009059|GO:0006412|GO:0043043	structural molecule activity|metabolic process|cellular metabolic process|intracellular|organic substance metabolic process|biosynthetic process|structural constituent of ribosome|nitrogen compound metabolic process|primary metabolic process|cytoplasm|protein metabolic process|ribosome|macromolecule biosynthetic process|translation|peptide biosynthetic process	K02962	small subunit ribosomal protein S17e[-]	ko03010	Ribosome	Chr10:21826090-21827543	13	16	10	12	16	848	0.519479	0.536759	0.355258	0.446182	0.566574	31.2371	0.470499	10.75	-4.514	2.38817e-05	0.0009272	DOWN
Potri.010G183100	-	-	-	-	-	-	-	-	Chr10:18054614-18056513	12	8	16	25	38	29	0.779738	0.436418	0.924268	1.51152	2.18808	1.73709	0.713475	1.81223	-1.34483	2.651e-05	0.001011	DOWN
Potri.008G112900	-	Armadillo/beta-catenin-like repeat family protein	GO:0003824|GO:0008152|GO:0044237|GO:0005515|GO:0071704|GO:0016740|GO:0044238|GO:0019538|GO:0004842|GO:0006464|GO:0016567	catalytic activity|metabolic process|cellular metabolic process|protein binding|organic substance metabolic process|transferase activity|primary metabolic process|protein metabolic process|ubiquitin-protein transferase activity|cellular protein modification process|protein ubiquitination	-	-	-	-	Chr08:7211800-7216590	6	7	4	16	28	15	0.0945176	0.0925879	0.0560199	0.234557	0.390907	0.217851	0.0810418	0.281105	-1.79437	2.89511e-05	0.00108622	DOWN
Potri.007G111500	ATKTI1,KTI1	kunitz trypsin inhibitor 1	GO:0030234|GO:0004857|GO:0004866	enzyme regulator activity|enzyme inhibitor activity|endopeptidase inhibitor activity	-	-	-	-	Chr07:13441972-13442687	4	4	8	14	18	23	0.647604	0.543617	1.15138	2.10911	2.58248	3.43273	0.780867	2.70811	-1.79414	3.04115e-05	0.00113116	DOWN
Potri.008G220200	-	Disease resistance protein (TIR-NBS-LRR class) family	GO:0005515|GO:0051716|GO:0000166|GO:0001882|GO:0007165|GO:0032549|GO:0043531	protein binding|cellular response to stimulus|nucleotide binding|nucleoside binding|signal transduction|ribonucleoside binding|ADP binding	-	-	-	-	Chr08:18450429-18456007	21	28	27	62	65	37	0.231106	0.258705	0.264168	0.63492	0.633918	0.375377	0.251327	0.548072	-1.1248	3.1486e-05	0.00116173	DOWN
Potri.010G208800	-	-	-	-	-	-	-	-	Chr10:19835797-19836036	36	40	41	21	19	16	17.3876	16.2197	17.6053	9.43826	8.13212	7.12402	17.0709	8.23147	1.05232	3.33928e-05	0.00120885	UP
Potri.007G113900	-	-	-	-	-	-	-	-	Chr07:13576322-13576774	21	22	20	6	8	8	5.37361	4.72623	4.54986	1.42853	1.81416	1.88716	4.88323	1.70995	1.51388	3.34925e-05	0.00120991	UP
Potri.017G112000	TCP1	TCP family transcription factor	-	-	-	-	-	-	Chr17:12759424-12760734	17	18	26	40	39	52	1.59044	1.41384	2.16253	3.48234	3.23341	4.4849	1.72227	3.73355	-1.11623	3.56003e-05	0.00127686	DOWN
Potri.002G189000	AtSAM2,MAT2,SAM-2,SAM2	S-adenosylmethionine synthetase 2	GO:0003824|GO:0008152|GO:0044237|GO:0071704|GO:0009058|GO:0006807|GO:0016740|GO:0044238|GO:0000166|GO:0001882|GO:0006139|GO:0006725|GO:0016765|GO:0009116|GO:0042398|GO:1901137|GO:0032549|GO:0004478|GO:0006556|GO:0005524	catalytic activity|metabolic process|cellular metabolic process|organic substance metabolic process|biosynthetic process|nitrogen compound metabolic process|transferase activity|primary metabolic process|nucleotide binding|nucleoside binding|nucleobase-containing compound metabolic process|cellular aromatic compound metabolic process|transferase activity, transferring alkyl or aryl (other than me…	K00789	S-adenosylmethionine synthetase[2.5.1.6]	ko01100|ko01100|ko01110|ko01230|ko00270	Metabolic pathways|Metabolic pathways|Biosynthesis of secondary metabolites|Biosynthesis of amino acids|Cysteine and methionine metabolism	Chr02:14883940-14885840	3	3	2	201	5	3	0.18292	0.153562	0.108415	11.4049	0.270184	0.16863	0.148299	3.94789	-4.7345	3.56711e-05	0.00127788	DOWN
Potri.005G039900	ERD6	Major facilitator superfamily protein	GO:0016020|GO:0016021|GO:0055085|GO:0006810	membrane|integral component of membrane|transmembrane transport|transport	-	-	-	-	Chr05:2920627-2928375	3	3	0	12	13	8	0.192862	0.161909	0	0.7179	0.740675	0.474144	0.118257	0.64424	-2.44567	4.15802e-05	0.00144122	DOWN
Potri.010G069100	ATFAO3,FAO3	fatty alcohol oxidase 3	GO:0003824|GO:0008152|GO:0016491|GO:0055114|GO:0016614	catalytic activity|metabolic process|oxidoreductase activity|oxidation-reduction process|oxidoreductase activity, acting on CH-OH group of donors	-	-	-	-	Chr10:9625087-9636567	25	37	44	12	17	17	0.147185	0.182885	0.2303	0.0657409	0.0886934	0.0922699	0.18679	0.0822347	1.1836	4.19278e-05	0.00144863	UP
Potri.006G023700	ATUGT85A1,UGT85A1	UDP-Glycosyltransferase superfamily protein	GO:0003824|GO:0008152|GO:0016740|GO:0016757|GO:0016758	catalytic activity|metabolic process|transferase activity|transferase activity, transferring glycosyl groups|transferase activity, transferring hexosyl groups	-	-	-	-	Chr06:1674997-1676963	25	25	14	41	45	48	0.998253	0.838104	0.497002	1.5234	1.59235	1.76694	0.777786	1.62756	-1.06527	4.21208e-05	0.00145363	DOWN
Potri.006G015300	ATINT4,INT4	inositol transporter 4	GO:0005215|GO:0016020|GO:0022857|GO:0016021|GO:0055085|GO:0006810	transporter activity|membrane|transmembrane transporter activity|integral component of membrane|transmembrane transport|transport	-	-	-	-	Chr06:1044828-1047767	2	8	7	23	39	11	0.11647	0.391241	0.362512	1.2467	2.01316	0.590677	0.290074	1.28351	-2.1456	5.06924e-05	0.00169884	DOWN
Potri.010G119900	IAA32,MEE10	indole-3-acetic acid inducible 32	GO:0008152|GO:0044237|GO:0005622|GO:0071704|GO:0009058|GO:0006807|GO:0044238|GO:0006139|GO:0006725|GO:0043231|GO:0016070|GO:0010468|GO:0005634|GO:0009059|GO:0006351|GO:0006355	metabolic process|cellular metabolic process|intracellular|organic substance metabolic process|biosynthetic process|nitrogen compound metabolic process|primary metabolic process|nucleobase-containing compound metabolic process|cellular aromatic compound metabolic process|intracellular membrane-bounded organelle|RNA metabolic process|regulation of gene expression|nucleus|macromolecule biosynthetic…	K14484	auxin-responsive protein IAA[-]	ko04075	Plant hormone signal transduction	Chr10:13689318-13691059	16	21	11	39	28	53	1.76979	1.95007	1.08167	4.01401	2.74456	5.40433	1.60051	4.0543	-1.34092	5.38838e-05	0.00178201	DOWN
Potri.010G116700	-	MATE efflux family protein	GO:0005215|GO:0016020|GO:0022857|GO:0055085|GO:0015238|GO:0006810|GO:0006855|GO:0015297	transporter activity|membrane|transmembrane transporter activity|transmembrane transport|drug transmembrane transporter activity|transport|drug transmembrane transport|antiporter activity	-	-	-	-	Chr10:13460579-13463855	7	3	7	13	28	18	0.366162	0.131734	0.325541	0.632755	1.29797	0.868013	0.274479	0.932912	-1.76505	5.47962e-05	0.00180772	DOWN
Potri.013G038501	-	Protein prenylyltransferase superfamily protein	-	-	-	-	-	-	Chr13:2640413-2641217	0	0	0	6	9	2	0	0	0	1.44771	2.06816	0.47819	0	1.33135	#NAME?	5.50541e-05	0.00181275	DOWN
Potri.009G058200	APAO,ATPAO1,PAO1	polyamine oxidase 1	GO:0003824|GO:0008152|GO:0016491|GO:0055114	catalytic activity|metabolic process|oxidoreductase activity|oxidation-reduction process	K13366	polyamine oxidase [EC:<a href=/dbget-bin/www_bget?ec:1.5.3.14>1.5.3.14</a> <a href=/dbget-bin/www_bget?ec:1.5.3.16>1.5.3.16</a> 1.5.3.-][-]	ko01100|ko01100|ko00330|ko00410	Metabolic pathways|Metabolic pathways|Arginine and proline metabolism|beta-Alanine metabolism	Chr09:6056650-6063243	33	32	39	11	20	16	2.31415	1.88395	2.43145	0.717822	1.24288	1.03434	2.20985	0.998348	1.14633	6.04598e-05	0.0019378	UP
Potri.005G154700	-	ATPase, F0 complex, subunit B/B\', bacterial/chloroplast	GO:0005215|GO:0008152|GO:0016020|GO:0044237|GO:0005622|GO:0022857|GO:0071704|GO:0009058|GO:0006807|GO:0044238|GO:0045263|GO:0055085|GO:0006139|GO:0006725|GO:0033177|GO:0006810|GO:0009116|GO:0034220|GO:1901137|GO:0006796|GO:0006811|GO:0009165|GO:0006812|GO:0015992|GO:0008324|GO:0006164|GO:0046034|GO:0015078|GO:0015986|GO:0006754	transporter activity|metabolic process|membrane|cellular metabolic process|intracellular|transmembrane transporter activity|organic substance metabolic process|biosynthetic process|nitrogen compound metabolic process|primary metabolic process|proton-transporting ATP synthase complex, coupling factor F(o)|transmembrane transport|nucleobase-containing compound metabolic process|cellular aromatic co…	K02109	F-type H+-transporting ATPase subunit b[-]	ko01100|ko01100|ko00190|ko00195	Metabolic pathways|Metabolic pathways|Oxidative phosphorylation|Photosynthesis	Chr05:14823481-14823969	48	73	90	107	120	214	11.3785	14.5283	18.9672	23.6021	25.2084	46.7657	14.958	31.8587	-1.09077	6.14659e-05	0.00196215	DOWN
Potri.013G074900	-	NADH dehydrogenase family protein	GO:0008152|GO:0016020|GO:0055114	metabolic process|membrane|oxidation-reduction process	-	-	-	-	Chr13:6408512-6409298	7	8	7	16	19	36	2.41492	2.31717	2.14702	5.13652	5.80866	11.4495	2.29304	7.46489	-1.70286	7.08996e-05	0.00220668	DOWN
Potri.017G045900	-	-	-	-	-	-	-	-	Chr17:3824337-3824774	41	34	37	20	18	15	10.8508	7.55455	8.70542	4.92522	4.22159	3.6597	9.03693	4.26884	1.08199	7.60487e-05	0.00234034	UP
Potri.015G033600	ATMYB52,BW52,MYB52	myb domain protein 52	-	-	-	-	-	-	Chr15:2784981-2786518	13	18	14	4	8	0	1.25479	1.45858	1.20133	0.359283	0.684276	0	1.3049	0.347853	1.90739	8.02166e-05	0.0024486	UP
Potri.007G138001	-	Tyrosine transaminase family protein	GO:0008152|GO:0048037|GO:0009058|GO:0030170	metabolic process|cofactor binding|biosynthetic process|pyridoxal phosphate binding	-	-	-	-	Chr07:14975693-14978034	12	20	26	48	46	32	0.879857	1.2311	1.69474	3.27482	2.98876	2.16289	1.26856	2.80882	-1.14677	8.31522e-05	0.00251275	DOWN
Potri.011G150100	-	2-oxoglutarate (2OG) and Fe(II)-dependent oxygenase superfamily protein	GO:0003824|GO:0008152|GO:0016491|GO:0055114	catalytic activity|metabolic process|oxidoreductase activity|oxidation-reduction process	-	-	-	-	Chr11:16858895-16861335	12	15	25	4	5	6	1.26345	1.32591	2.34004	0.391915	0.466503	0.582317	1.64313	0.480245	1.77461	8.32988e-05	0.00251465	UP
Potri.003G030450	-	-	-	-	-	-	-	-	Chr03:3826628-3826882	13	16	14	29	27	52	5.90983	6.10643	5.65803	12.2669	10.8766	21.7914	5.89143	14.9783	-1.34618	9.14804e-05	0.00272075	DOWN
Potri.001G168000	-	Protein kinase superfamily protein	GO:0003824|GO:0008152|GO:0044237|GO:0071704|GO:0016740|GO:0044238|GO:0016772|GO:0019538|GO:0016301|GO:0006796|GO:0016773|GO:0006464|GO:0016310|GO:0004672|GO:0006468	catalytic activity|metabolic process|cellular metabolic process|organic substance metabolic process|transferase activity|primary metabolic process|transferase activity, transferring phosphorus-containing groups|protein metabolic process|kinase activity|phosphate-containing compound metabolic process|phosphotransferase activity, alcohol group as acceptor|cellular protein modification process|phosp…	K04733	interleukin-1 receptor-associated kinase 4[2.7.11.1]	ko04064|ko04624	NF-kappa B signaling pathway|Toll and Imd signaling pathway	Chr01:14143979-14145834	1	0	0	5	4	11	0.0837819	0	0	0.389676	0.296856	0.849312	0.0279273	0.511948	-4.19625	9.3689e-05	0.00277275	DOWN
Potri.001G079900	ATERF-1,ERF-1	ethylene responsive element binding factor 1	GO:0008152|GO:0044237|GO:0003700|GO:0071704|GO:0009058|GO:0006807|GO:0044238|GO:0006139|GO:0006725|GO:0016070|GO:0010468|GO:0009059|GO:0006351|GO:0006355	metabolic process|cellular metabolic process|transcription factor activity, sequence-specific DNA binding|organic substance metabolic process|biosynthetic process|nitrogen compound metabolic process|primary metabolic process|nucleobase-containing compound metabolic process|cellular aromatic compound metabolic process|RNA metabolic process|regulation of gene expression|macromolecule biosynthetic p…	-	-	-	-	Chr01:6327580-6328653	19	34	23	10	10	10	2.05072	3.08091	2.20698	1.0043	0.956462	0.995003	2.4462	0.985257	1.31197	9.73525e-05	0.00286056	UP
Potri.011G062300	-	Peroxidase superfamily protein	GO:0016209|GO:0003824|GO:0008152|GO:0016491|GO:0004601|GO:0006950|GO:0055114|GO:0006979|GO:0020037	antioxidant activity|catalytic activity|metabolic process|oxidoreductase activity|peroxidase activity|response to stress|oxidation-reduction process|response to oxidative stress|heme binding	K00430	peroxidase[1.11.1.7]	ko01100|ko01100|ko01110|ko00940	Metabolic pathways|Metabolic pathways|Biosynthesis of secondary metabolites|Phenylpropanoid biosynthesis	Chr11:5543712-5545818	22	27	31	7	17	8	2.22725	2.29487	2.79011	0.659442	1.52514	0.746622	2.43741	0.977068	1.31882	9.80106e-05	0.00287219	UP
Potri.013G159500	-	Leucine-rich repeat protein kinase family protein	GO:0003824|GO:0008152|GO:0044237|GO:0005515|GO:0071704|GO:0016740|GO:0044238|GO:0016772|GO:0000166|GO:0001882|GO:0019538|GO:0016301|GO:0032549|GO:0006796|GO:0016773|GO:0006464|GO:0016310|GO:0005524|GO:0004672|GO:0006468	catalytic activity|metabolic process|cellular metabolic process|protein binding|organic substance metabolic process|transferase activity|primary metabolic process|transferase activity, transferring phosphorus-containing groups|nucleotide binding|nucleoside binding|protein metabolic process|kinase activity|ribonucleoside binding|phosphate-containing compound metabolic process|phosphotransferase ac…	-	-	-	-	Chr13:16162975-16169041	2	3	4	15	11	11	0.0839465	0.105731	0.149292	0.585996	0.409276	0.425733	0.11299	0.473668	-2.06769	9.82494e-05	0.00287384	DOWN
Potri.012G108900	-	-	-	-	-	-	-	-	Chr12:13192348-13196095	32	27	43	17	14	14	2.42758	1.71965	2.90012	1.20006	0.941158	0.979067	2.34912	1.04009	1.17541	0.000106969	0.00309286	UP
Potri.008G166500	ATPPCK1,PPCK1	phosphoenolpyruvate carboxylase kinase 1	-	-	K08794	calcium/calmodulin-dependent protein kinase I[2.7.11.17]	ko04925	Aldosterone synthesis and secretion	Chr08:11357625-11358617	30	38	27	14	15	15	2.04563	2.17537	1.63676	0.888307	0.906389	0.942912	1.95258	0.912536	1.09743	0.00011071	0.00317362	UP
Potri.004G139700	ATFLS1,FLS,FLS1	flavonol synthase 1	GO:0003824|GO:0008152|GO:0016491|GO:0055114	catalytic activity|metabolic process|oxidoreductase activity|oxidation-reduction process	K05278	flavonol synthase[1.14.11.23]	ko01100|ko01100|ko01110|ko00941	Metabolic pathways|Metabolic pathways|Biosynthesis of secondary metabolites|Flavonoid biosynthesis	Chr04:16251970-16254608	12	13	13	3	4	3	1.17191	1.0658	1.12864	0.272588	0.346124	0.270064	1.12211	0.296259	1.92129	0.00011569	0.00329753	UP
Potri.002G262400	-	Protein of unknown function (DUF620)	-	-	-	-	-	-	Chr02:25032166-25033947	4	3	8	0	0	0	0.412164	0.259486	0.73279	0	0	0	0.468147	0	Inf	0.000125758	0.00351156	UP
Potri.007G113400	-	-	-	-	-	-	-	-	Chr07:13561227-13562970	10	14	14	30	35	22	0.72994	0.858013	0.908562	2.0377	2.26407	1.48049	0.832172	1.92742	-1.21172	0.000127048	0.00353762	DOWN
Potri.T157500	-	S-locus lectin protein kinase family protein	GO:0003824|GO:0008152|GO:0044237|GO:0071704|GO:0016740|GO:0044238|GO:0016772|GO:0048544|GO:0019538|GO:0016301|GO:0006796|GO:0016773|GO:0006464|GO:0016310|GO:0004672|GO:0006468|GO:0004674	catalytic activity|metabolic process|cellular metabolic process|organic substance metabolic process|transferase activity|primary metabolic process|transferase activity, transferring phosphorus-containing groups|recognition of pollen|protein metabolic process|kinase activity|phosphate-containing compound metabolic process|phosphotransferase activity, alcohol group as acceptor|cellular protein modi…	-	-	-	-	scaffold_675:4982-8367	12	12	11	27	32	22	0.531342	0.446065	0.433	1.11242	1.25559	0.898021	0.470136	1.08868	-1.21143	0.000128135	0.00356129	DOWN
Potri.001G134000	PRK	phosphoribulokinase	GO:0003824|GO:0008152|GO:0016740|GO:0016772|GO:0000166|GO:0001882|GO:0016301|GO:0032549|GO:0005524	catalytic activity|metabolic process|transferase activity|transferase activity, transferring phosphorus-containing groups|nucleotide binding|nucleoside binding|kinase activity|ribonucleoside binding|ATP binding	K00855	phosphoribulokinase[2.7.1.19]	ko01100|ko01100|ko01120|ko01200|ko00710	Metabolic pathways|Metabolic pathways|Microbial metabolism in diverse environments|Carbon metabolism|Carbon fixation in photosynthetic organisms	Chr01:10770442-10772874	27	27	43	12	14	16	2.56965	2.15733	3.63824	1.0627	1.1807	1.40375	2.78841	1.21572	1.19764	0.000128566	0.00356693	UP
Potri.003G116700	-	MATE efflux family protein	GO:0005215|GO:0016020|GO:0022857|GO:0055085|GO:0015238|GO:0006810|GO:0006855|GO:0015297	transporter activity|membrane|transmembrane transporter activity|transmembrane transport|drug transmembrane transporter activity|transport|drug transmembrane transport|antiporter activity	-	-	-	-	Chr03:14017625-14019154	15	17	18	33	51	28	1.13646	1.08134	1.21241	2.32651	3.42409	1.95565	1.1434	2.56875	-1.16773	0.000129354	0.00357868	DOWN
Potri.006G128900	-	FAD-binding Berberine family protein	GO:0003824|GO:0008152|GO:0016491|GO:0048037|GO:0055114|GO:0000166|GO:0050662|GO:0050660	catalytic activity|metabolic process|oxidoreductase activity|cofactor binding|oxidation-reduction process|nucleotide binding|coenzyme binding|flavin adenine dinucleotide binding	-	-	-	-	Chr06:10504422-10506038	2	5	5	26	13	10	0.147159	0.308982	0.327175	1.78063	0.847896	0.678498	0.261106	1.10234	-2.07787	0.000144784	0.00392625	DOWN
Potri.014G034300	-	P-loop containing nucleoside triphosphate hydrolases superfamily protein	-	-	-	-	-	-	Chr14:2812855-2815190	9	18	6	3	2	1	0.623997	1.0477	0.369792	0.193518	0.122862	0.0638843	0.680496	0.126755	2.42455	0.00015207	0.00408339	UP
Potri.010G035900	IAR3,JR3	peptidase M20/M25/M40 family protein	GO:0003824|GO:0008152|GO:0016787	catalytic activity|metabolic process|hydrolase activity	-	-	-	-	Chr10:6223756-6225998	31	22	19	41	48	58	2.48	1.47756	1.35134	3.05206	3.40288	4.27747	1.76963	3.57747	-1.01549	0.000179496	0.00466194	DOWN
Potri.006G067200	ATBCB,BCB,SAG14	blue-copper-binding protein	GO:0009055	electron carrier activity	-	-	-	-	Chr06:5035688-5037170	20	19	25	46	32	60	5.8546	4.66935	6.50603	12.5297	8.30087	16.1911	5.67666	12.3405	-1.12029	0.000183537	0.00474237	DOWN
Potri.001G013400	-	Major facilitator superfamily protein	GO:0005215|GO:0016020|GO:0006810	transporter activity|membrane|transport	-	-	-	-	Chr01:905880-908819	8	19	14	32	29	27	0.412898	0.823268	0.642385	1.53679	1.32634	1.2846	0.626184	1.38257	-1.1427	0.000193987	0.00495293	DOWN
Potri.010G100032	-	-	-	-	-	-	-	-	Chr10:12168193-12168573	22	15	15	3	6	8	21.2517	12.1653	12.8816	2.69635	5.1366	7.12402	15.4328	4.98566	1.63015	0.000194877	0.00497143	UP
Potri.016G019400	-	UDP-Glycosyltransferase superfamily protein	GO:0003824|GO:0008152|GO:0016740|GO:0016757|GO:0016758	catalytic activity|metabolic process|transferase activity|transferase activity, transferring glycosyl groups|transferase activity, transferring hexosyl groups	-	-	-	-	Chr16:1059857-1062836	0	4	0	13	8	6	0	0.268434	0	0.967025	0.56677	0.44216	0.089478	0.658651	-2.87991	0.000202239	0.00512453	DOWN
Potri.T084500	RLK1	receptor-like protein kinase 1	GO:0003824|GO:0008152|GO:0044237|GO:0071704|GO:0016740|GO:0044238|GO:0016772|GO:0000166|GO:0001882|GO:0019538|GO:0016301|GO:0032549|GO:0006796|GO:0016773|GO:0006464|GO:0016310|GO:0005524|GO:0004672|GO:0006468	catalytic activity|metabolic process|cellular metabolic process|organic substance metabolic process|transferase activity|primary metabolic process|transferase activity, transferring phosphorus-containing groups|nucleotide binding|nucleoside binding|protein metabolic process|kinase activity|ribonucleoside binding|phosphate-containing compound metabolic process|phosphotransferase activity, alcohol …	-	-	-	-	scaffold_95:52986-55816	1	3	4	15	10	9	0.0409587	0.103116	0.1456	0.571507	0.362854	0.339702	0.0965584	0.424688	-2.13693	0.000211423	0.0052993	DOWN
Potri.005G190100	ATEXT1,ATEXT4,EXT1,EXT4,ORG5	extensin 4	-	-	-	-	-	-	Chr05:20755700-20756323	0	0	0	15	0	9	0	0	0	4.02471	0	2.39228	0	2.139	#NAME?	0.000211717	0.00530225	DOWN
Potri.005G078200	SAH7	Pollen Ole e 1 allergen and extensin family protein	-	-	-	-	-	-	Chr05:5761130-5761898	0	1	0	4	6	7	0	0.153482	0	0.680598	0.972226	1.17992	0.0511606	0.944247	-4.20606	0.000212034	0.00530578	DOWN
Potri.013G113100	ANAC030,VND7	vascular related NAC-domain protein 7	GO:0008152|GO:0044237|GO:0071704|GO:0009058|GO:0006807|GO:0044238|GO:0003676|GO:0006139|GO:0006725|GO:0016070|GO:0003677|GO:0010468|GO:0009059|GO:0006351|GO:0006355	metabolic process|cellular metabolic process|organic substance metabolic process|biosynthetic process|nitrogen compound metabolic process|primary metabolic process|nucleic acid binding|nucleobase-containing compound metabolic process|cellular aromatic compound metabolic process|RNA metabolic process|DNA binding|regulation of gene expression|macromolecule biosynthetic process|transcription, DNA-te…	-	-	-	-	Chr13:12653096-12656685	2	0	0	6	11	4	0.0679496	0	0	0.189717	0.331285	0.12533	0.0226499	0.215444	-3.24974	0.000223838	0.00552316	DOWN
Potri.017G069700	MPL1	Myzus persicae-induced lipase 1	GO:0008152|GO:0071704|GO:0044238|GO:0006629	metabolic process|organic substance metabolic process|primary metabolic process|lipid metabolic process	-	-	-	-	Chr17:7917831-7920071	14	19	10	4	5	4	1.33897	1.52563	0.850332	0.356022	0.423779	0.352725	1.23831	0.377509	1.71379	0.000237745	0.00579983	UP
Potri.003G194700	SIB1	sigma factor binding protein 1	-	-	-	-	-	-	Chr03:19815795-19816443	4	7	6	15	14	21	0.71446	1.04971	0.952684	2.49297	2.21585	3.45775	0.905618	2.72219	-1.58779	0.000240469	0.00585679	DOWN
Potri.003G134100	ALMT9,AtALMT9	aluminum-activated malate transporter 9	GO:0006810|GO:0006811|GO:0006820|GO:0015740|GO:0015743	transport|ion transport|anion transport|C4-dicarboxylate transport|malate transport	-	-	-	-	Chr03:15347756-15351174	0	2	6	9	13	12	0	0.066218	0.210375	0.33032	0.454385	0.436334	0.0921976	0.407013	-2.14227	0.000243448	0.00591978	DOWN
Potri.001G428100	-	NB-ARC domain-containing disease resistance protein	GO:0000166|GO:0001882|GO:0032549|GO:0043531	nucleotide binding|nucleoside binding|ribonucleoside binding|ADP binding	K13459	disease resistance protein RPS2[-]	ko04626	Plant-pathogen interaction	Chr01:45750560-45758236	1	44	27	4	2	2	0.00878108	0.324277	0.210715	0.0326769	0.0155566	0.0161871	0.181258	0.0214735	3.07741	0.000247095	0.00599394	UP
Potri.016G094066	-	unfolded protein binding	GO:0008152|GO:0016020|GO:0044237|GO:0005622|GO:0016021|GO:0009579|GO:0015979|GO:0009521|GO:0009522	metabolic process|membrane|cellular metabolic process|intracellular|integral component of membrane|thylakoid|photosynthesis|photosystem|photosystem I	-	-	-	-	Chr16:8215607-8216716	31	36	49	66	58	179	3.23741	3.15631	4.54925	6.4135	5.36758	17.2326	3.64766	9.67124	-1.40673	0.000255852	0.00617157	DOWN
Potri.001G097900	-	Cellulase (glycosyl hydrolase family 5) protein	GO:0003824|GO:0008152|GO:0071704|GO:0016787|GO:0044238|GO:0005975|GO:0016798|GO:0004553	catalytic activity|metabolic process|organic substance metabolic process|hydrolase activity|primary metabolic process|carbohydrate metabolic process|hydrolase activity, acting on glycosyl bonds|hydrolase activity, hydrolyzing O-glycosyl compounds	-	-	-	-	Chr01:7704941-7706988	19	25	26	8	12	10	1.23943	1.36917	1.50781	0.485579	0.693678	0.60137	1.37214	0.593542	1.209	0.000259983	0.00626122	UP
Potri.004G199900	-	NAD(P)-binding Rossmann-fold superfamily protein	-	-	-	-	-	-	Chr04:21183922-21185155	35	26	43	15	20	13	4.32538	2.69757	4.72429	1.72488	2.19028	1.48102	3.91575	1.79873	1.12231	0.000266504	0.00637748	UP
Potri.014G091000	-	RING/U-box superfamily protein	GO:0005515|GO:0043169|GO:0046872|GO:0008270	protein binding|cation binding|metal ion binding|zinc ion binding	-	-	-	-	Chr14:7136942-7137825	41	39	27	19	12	19	5.37632	4.29347	3.14761	2.31836	1.39442	2.29675	4.27247	2.00318	1.09278	0.000269886	0.00644306	UP
Potri.007G114700	-	hydroxyproline-rich glycoprotein family protein	-	-	-	-	-	-	Chr07:13599043-13599366	30	35	47	14	20	21	10.7332	10.513	14.9493	4.66087	6.34099	6.92618	12.0652	5.97601	1.01359	0.000270216	0.00644582	UP
Potri.010G220500	ATMLO6,MLO6	Seven transmembrane MLO family protein	GO:0016020|GO:0006950|GO:0016021|GO:0006952	membrane|response to stress|integral component of membrane|defense response	-	-	-	-	Chr10:20573446-20577261	8	11	9	23	21	22	0.476796	0.550381	0.476861	1.27554	1.10913	1.20875	0.501346	1.19781	-1.25652	0.000287458	0.00677133	DOWN
Potri.015G026300	-	Protein kinase superfamily protein	GO:0003824|GO:0008152|GO:0044237|GO:0071704|GO:0016740|GO:0044238|GO:0016772|GO:0048544|GO:0000166|GO:0001882|GO:0019538|GO:0016301|GO:0032549|GO:0006796|GO:0016773|GO:0006464|GO:0016310|GO:0005524|GO:0004672|GO:0006468	catalytic activity|metabolic process|cellular metabolic process|organic substance metabolic process|transferase activity|primary metabolic process|transferase activity, transferring phosphorus-containing groups|recognition of pollen|nucleotide binding|nucleoside binding|protein metabolic process|kinase activity|ribonucleoside binding|phosphate-containing compound metabolic process|phosphotransfer…	-	-	-	-	Chr15:2050026-2053482	0	0	0	5	4	4	0	0	0	0.127951	0.0974731	0.101424	0	0.108949	#NAME?	0.000304765	0.00711229	DOWN
Potri.014G040700	ATLP-3,TLP-3	thaumatin-like protein 3	-	-	-	-	-	-	Chr14:3316751-3317896	16	14	15	5	6	4	2.18719	1.60675	1.82286	0.635981	0.726877	0.50413	1.87227	0.622329	1.58904	0.000306938	0.00715191	UP
Potri.010G085400	-	Bifunctional inhibitor/lipid-transfer protein/seed storage 2S albumin superfamily protein	-	-	-	-	-	-	Chr10:11057490-11058868	28	30	36	17	13	16	3.99236	3.59109	4.56332	2.25545	1.6426	2.10303	4.04892	2.00036	1.01728	0.000322841	0.0074419	UP
Potri.007G109700	-	Protein of unknown function (DUF506)	-	-	-	-	-	-	Chr07:13300749-13308992	10	12	12	4	1	4	0.2669	0.268892	0.284757	0.099355	0.0236636	0.0984348	0.273516	0.0738178	1.88959	0.000324136	0.00746033	UP
Potri.005G108300	THE1	protein kinase family protein	GO:0003824|GO:0008152|GO:0044237|GO:0071704|GO:0016740|GO:0044238|GO:0016772|GO:0000166|GO:0001882|GO:0019538|GO:0016301|GO:0032549|GO:0006796|GO:0016773|GO:0006464|GO:0016310|GO:0005524|GO:0004672|GO:0006468	catalytic activity|metabolic process|cellular metabolic process|organic substance metabolic process|transferase activity|primary metabolic process|transferase activity, transferring phosphorus-containing groups|nucleotide binding|nucleoside binding|protein metabolic process|kinase activity|ribonucleoside binding|phosphate-containing compound metabolic process|phosphotransferase activity, alcohol …	-	-	-	-	Chr05:8293510-8295696	5	5	3	0	0	0	0.357581	0.300214	0.190749	0	0	0	0.282848	0	Inf	0.000330165	0.00755294	UP
Potri.014G151800	-	Eukaryotic protein of unknown function (DUF914)	GO:0016020|GO:0016021|GO:0006810	membrane|integral component of membrane|transport	-	-	-	-	Chr14:11716183-11723039	5	9	13	17	22	31	0.357581	0.540331	0.826459	1.13121	1.39414	2.04362	0.57479	1.52299	-1.4058	0.000329792	0.00755294	DOWN
Potri.017G105700	-	disease resistance protein (TIR-NBS-LRR class), putative	GO:0005515|GO:0051716|GO:0000166|GO:0001882|GO:0007165|GO:0032549|GO:0043531	protein binding|cellular response to stimulus|nucleotide binding|nucleoside binding|signal transduction|ribonucleoside binding|ADP binding	-	-	-	-	Chr17:12284924-12290743	4	4	3	18	19	6	0.0731248	0.061383	0.0487626	0.306182	0.307792	0.101109	0.0610901	0.238361	-1.96414	0.000329985	0.00755294	DOWN
Potri.016G125000	-	Peroxidase superfamily protein	GO:0016209|GO:0003824|GO:0008152|GO:0016491|GO:0004601|GO:0006950|GO:0055114|GO:0006979|GO:0020037	antioxidant activity|catalytic activity|metabolic process|oxidoreductase activity|peroxidase activity|response to stress|oxidation-reduction process|response to oxidative stress|heme binding	K00430	peroxidase[1.11.1.7]	ko01100|ko01100|ko01110|ko00940	Metabolic pathways|Metabolic pathways|Biosynthesis of secondary metabolites|Phenylpropanoid biosynthesis	Chr16:12813446-12814790	16	14	28	5	8	7	1.68459	1.23753	2.62078	0.489838	0.746427	0.679444	1.84764	0.63857	1.53276	0.000331959	0.00758246	UP
Potri.T177600	-	-	-	-	-	-	-	-	scaffold_1678:192-589	0	0	0	6	4	3	0	0	0	1.62594	1.03228	0.805441	0	1.15456	#NAME?	0.000343555	0.00780002	DOWN
Potri.015G120100	ATPP2-A10,PP2-A10	phloem protein 2-A10	-	-	-	-	-	-	Chr15:13500629-13501650	4	4	5	13	12	16	0.682893	0.573239	0.758912	2.06507	1.81541	2.51806	0.671681	2.13285	-1.66693	0.000363655	0.00815194	DOWN
Potri.013G155300	ATOFP17,OFP17	ovate family protein 17	-	-	-	-	-	-	Chr13:15814307-15815193	15	24	19	3	11	8	1.9603	2.63327	2.20755	0.364783	1.27397	0.963791	2.26704	0.867515	1.38585	0.000365875	0.0081956	UP
Potri.003G130500	-	CCT motif family protein	GO:0005515	protein binding	-	-	-	-	Chr03:15019496-15021504	9	18	7	3	2	3	0.731643	1.22844	0.505889	0.226902	0.144056	0.224801	0.82199	0.198586	2.04935	0.000375977	0.00840313	UP
Potri.012G104300	-	Uncharacterised protein family (UPF0497)	-	-	-	-	-	-	Chr12:12847232-12848149	14	22	21	3	12	6	2.25706	2.97772	3.01001	0.450017	1.71442	0.891699	2.74826	1.01871	1.43178	0.000380848	0.00849312	UP
Potri.010G007401	-	-	-	-	-	-	-	-	Chr10:722105-722601	6	7	4	19	14	15	0.747004	0.731753	0.442744	2.20133	1.54467	1.72175	0.6405	1.82258	-1.50871	0.000407494	0.00898755	DOWN
Potri.001G069000	GH3.17	Auxin-responsive GH3 family protein	-	-	K14487	auxin responsive GH3 gene family[-]	ko04075	Plant hormone signal transduction	Chr01:5486420-5489094	2	4	7	0	0	0	0.104498	0.175487	0.325247	0	0	0	0.201744	0	Inf	0.000431759	0.00940566	UP
Potri.001G100800	BEL1	POX (plant homeobox) family protein	GO:0008152|GO:0044237|GO:0071704|GO:0009058|GO:0006807|GO:0044238|GO:0003676|GO:0006139|GO:0006725|GO:0016070|GO:0003677|GO:0010468|GO:0009059|GO:0006351|GO:0006355	metabolic process|cellular metabolic process|organic substance metabolic process|biosynthetic process|nitrogen compound metabolic process|primary metabolic process|nucleic acid binding|nucleobase-containing compound metabolic process|cellular aromatic compound metabolic process|RNA metabolic process|DNA binding|regulation of gene expression|macromolecule biosynthetic process|transcription, DNA-te…	-	-	-	-	Chr01:7986507-7990311	7	6	8	27	18	13	0.304357	0.219038	0.309223	1.09239	0.69357	0.52108	0.277539	0.769013	-1.47032	0.00046387	0.00994369	DOWN
Potri.T157600	-	Protein of unknown function (DUF594)	-	-	-	-	-	-	scaffold_678:4624-12178	2	56	49	4	7	7	0.0836737	1.96746	1.82299	0.155776	0.259583	0.270061	1.29137	0.228473	2.49881	0.000472126	0.0100312	UP
Potri.001G400401	-	-	-	-	-	-	-	-	Chr01:42212273-42212743	22	28	30	13	11	14	5.41443	5.78543	6.5641	2.97704	2.39918	3.17625	5.92132	2.85082	1.05454	0.00047559	0.0100977	UP
Potri.001G405400	-	-	-	-	-	-	-	-	Chr01:42776725-42776982	5	3	2	11	11	13	2.24666	1.13148	0.798826	4.59907	4.37989	5.38449	1.39232	4.78782	-1.78187	0.000483652	0.0102276	DOWN
Potri.006G002301	-	-	-	-	-	-	-	-	Chr06:184334-184652	7	8	8	16	19	22	3.55884	3.41478	3.61574	7.56961	8.56013	10.3115	3.52979	8.81374	-1.32017	0.000488346	0.0103104	DOWN
Potri.018G127000	-	-	-	-	-	-	-	-	Chr18:14914193-14916987	13	18	15	31	39	24	2.09016	2.42962	2.14395	4.63773	5.55644	3.55707	2.22124	4.58375	-1.04516	0.000492856	0.0103838	DOWN
Potri.011G003900	PR5K	PR5-like receptor kinase	-	-	K04733	interleukin-1 receptor-associated kinase 4[2.7.11.1]	ko04064|ko04624	NF-kappa B signaling pathway|Toll and Imd signaling pathway	Chr11:279147-281529	2	3	0	15	10	4	0.0690015	0.0869075	0	0.481672	0.305817	0.127271	0.0519697	0.30492	-2.55269	0.000524846	0.0109278	DOWN
Potri.006G164600	ABI1,AtABI1	Protein phosphatase 2C family protein	GO:0003824|GO:0008152|GO:0044237|GO:0071704|GO:0016787|GO:0044238|GO:0016788|GO:0019538|GO:0006796|GO:0042578|GO:0006464|GO:0016791|GO:0006470|GO:0004721|GO:0004722	catalytic activity|metabolic process|cellular metabolic process|organic substance metabolic process|hydrolase activity|primary metabolic process|hydrolase activity, acting on ester bonds|protein metabolic process|phosphate-containing compound metabolic process|phosphoric ester hydrolase activity|cellular protein modification process|phosphatase activity|protein dephosphorylation|phosphoprotein ph…	K14497	protein phosphatase 2C[3.1.3.16]	ko04075|ko04016|ko04931	Plant hormone signal transduction|MAPK signaling pathway - plant|Insulin resistance	Chr06:16592322-16602073	4	2	2	11	8	12	0.195813	0.0821853	0.0870343	0.501081	0.347051	0.541548	0.121677	0.463226	-1.92866	0.000572902	0.0116624	DOWN
Potri.015G120500	-	-	-	-	-	-	-	-	Chr15:13524911-13525524	10	10	9	0	4	3	3.18446	2.67358	2.54806	0	1.12871	0.880675	2.80204	0.669794	2.06469	0.000576622	0.0117144	UP
Potri.006G209400	-	-	-	-	-	-	-	-	Chr06:22453541-22454917	27	28	27	16	12	12	2.35149	2.04729	2.09052	1.29667	0.926119	0.963475	2.1631	1.06209	1.0262	0.000598117	0.0120697	UP
Potri.T167100	-	Glycosyl hydrolase superfamily protein	GO:0003824|GO:0008152|GO:0071704|GO:0016787|GO:0044238|GO:0005975|GO:0016798|GO:0004553	catalytic activity|metabolic process|organic substance metabolic process|hydrolase activity|primary metabolic process|carbohydrate metabolic process|hydrolase activity, acting on glycosyl bonds|hydrolase activity, hydrolyzing O-glycosyl compounds	-	-	-	-	scaffold_899:11829-13615	2	3	2	9	13	7	0.186916	0.235421	0.166207	0.782912	1.07696	0.603281	0.196182	0.821052	-2.06528	0.000614161	0.0123274	DOWN
Potri.001G418200	ATGA2OX8,GA2OX8	gibberellin 2-oxidase 8	GO:0003824|GO:0008152|GO:0016491|GO:0055114	catalytic activity|metabolic process|oxidoreductase activity|oxidation-reduction process	-	-	-	-	Chr01:44298193-44302205	8	10	9	24	15	26	0.748482	0.785459	0.748584	2.08938	1.24363	2.24245	0.760842	1.85849	-1.28846	0.000616532	0.0123668	DOWN
Potri.001G174500	ATBOR4,BOR4	HCO3- transporter family	GO:0005215|GO:0016020|GO:0022857|GO:0016021|GO:0006810|GO:0006811|GO:0015297|GO:0006820|GO:0005452	transporter activity|membrane|transmembrane transporter activity|integral component of membrane|transport|ion transport|antiporter activity|anion transport|inorganic anion exchanger activity	-	-	-	-	Chr01:14786569-14791641	6	4	1	12	15	10	0.208784	0.116851	0.0309537	0.388584	0.462582	0.320815	0.118863	0.39066	-1.71662	0.000618889	0.0123893	DOWN
Potri.011G120800	ATRMA3,RMA3	RING membrane-anchor 3	-	-	K10666	E3 ubiquitin-protein ligase RNF5[2.3.2.27]	ko04141	Protein processing in endoplasmic reticulum	Chr11:14606555-14608801	6	8	11	0	2	3	0.309506	0.346493	0.504492	0	0.0914217	0.142664	0.38683	0.0780285	2.30963	0.000627395	0.012518	UP
Potri.007G103800	AT2353,ATGA20OX2,GA20OX2	gibberellin 20 oxidase 2	GO:0003824|GO:0008152|GO:0016491|GO:0055114	catalytic activity|metabolic process|oxidoreductase activity|oxidation-reduction process	K05282	gibberellin 20-oxidase[1.14.11.12]	ko01100|ko01100|ko01110	Metabolic pathways|Metabolic pathways|Biosynthesis of secondary metabolites	Chr07:12834897-12837963	5	10	10	0	3	2	0.398103	0.668396	0.707831	0	0.211673	0.146807	0.591443	0.119493	2.30731	0.000634486	0.0126177	UP
Potri.001G338500	-	RPM1-interacting protein 4 (RIN4) family protein	-	-	-	-	-	-	Chr01:34215588-34216632	5	5	5	1	0	0	1.42768	1.19864	1.26921	0.265549	0	0	1.29851	0.0885163	3.87477	0.000637824	0.0126757	UP
Potri.002G254200	YUC8	Flavin-binding monooxygenase family protein	-	-	K11816	indole-3-pyruvate monooxygenase[1.14.13.168]	ko01100|ko01100|ko00380	Metabolic pathways|Metabolic pathways|Tryptophan metabolism	Chr02:24328370-24330177	0	0	1	4	5	6	0	0	0.0705244	0.295143	0.351313	0.43853	0.0235081	0.361662	-3.94341	0.000660757	0.013054	DOWN
Potri.016G073700	ABA2,ATABA2,ATSDR1,GIN1,ISI4,SDR1,SIS4,SRE1	NAD(P)-binding Rossmann-fold superfamily protein	-	-	-	-	-	-	Chr16:5563803-5564869	9	11	7	16	20	30	1.20895	1.24043	0.835919	1.99985	2.38063	3.71483	1.0951	2.69844	-1.30106	0.000686495	0.0134303	DOWN
Potri.T006200	-	ribulose-bisphosphate carboxylases	GO:0043169|GO:0046872|GO:0000287	cation binding|metal ion binding|magnesium ion binding	-	-	-	-	scaffold_22:37058-38271	0	0	7	7	12	28	0	0	1.46626	1.53468	2.50542	6.08161	0.488752	3.3739	-2.78724	0.000687173	0.0134349	DOWN
Potri.006G268300	-	NAD(P)-binding Rossmann-fold superfamily protein	-	-	-	-	-	-	Chr06:26956264-26962482	0	0	0	5	5	2	0	0	0	1.25714	1.19725	0.498254	0	0.984214	#NAME?	0.000689581	0.0134645	DOWN
Potri.001G275700	-	Predicted AT-hook DNA-binding family protein	-	-	-	-	-	-	Chr01:28226536-28227444	15	21	33	13	9	4	1.91285	2.24827	3.74123	1.54256	1.01702	0.470299	2.63412	1.00996	1.38302	0.000705773	0.0136828	UP
Potri.006G053000	-	elongation factor family protein	GO:0000166|GO:0001882|GO:0032549|GO:0005525|GO:0019001	nucleotide binding|nucleoside binding|ribonucleoside binding|GTP binding|guanyl nucleotide binding	-	-	-	-	Chr06:3824445-3831886	7	3	0	17	17	7	0.369497	0.132934	0	0.835011	0.795212	0.34065	0.167477	0.656958	-1.97184	0.000717158	0.0138359	DOWN
Potri.016G071600	ATNHL10,NHL10,YLS9	Late embryogenesis abundant (LEA) hydroxyproline-rich glycoprotein family	-	-	-	-	-	-	Chr16:5256061-5256833	23	27	21	16	6	9	3.4491	3.39926	2.79973	2.23269	0.797402	1.24411	3.21603	1.42473	1.17459	0.000728629	0.0139912	UP
Potri.012G062601	-	ribulose-bisphosphate carboxylases	GO:0043169|GO:0046872|GO:0000287	cation binding|metal ion binding|magnesium ion binding	K01601	ribulose-bisphosphate carboxylase large chain[4.1.1.39]	ko01100|ko01100|ko01120|ko01200|ko00630|ko00710	Metabolic pathways|Metabolic pathways|Microbial metabolism in diverse environments|Carbon metabolism|Glyoxylate and dicarboxylate metabolism|Carbon fixation in photosynthetic organisms	Chr12:7087527-7087933	83	114	211	184	221	579	23.6395	27.2589	53.4265	48.764	55.7787	152.022	34.775	85.5217	-1.29824	0.000741695	0.0141591	DOWN
Potri.016G074800	TBL8	TRICHOME BIREFRINGENCE-LIKE 8	-	-	-	-	-	-	Chr16:5665987-5668351	7	9	6	19	20	15	0.496886	0.536361	0.378623	1.25501	1.2581	0.981599	0.470623	1.1649	-1.30757	0.000757072	0.0143543	DOWN
Potri.011G039000	-	S-locus lectin protein kinase family protein	GO:0003824|GO:0008152|GO:0044237|GO:0071704|GO:0016740|GO:0044238|GO:0016772|GO:0048544|GO:0019538|GO:0016301|GO:0006796|GO:0016773|GO:0006464|GO:0016310|GO:0004672|GO:0006468	catalytic activity|metabolic process|cellular metabolic process|organic substance metabolic process|transferase activity|primary metabolic process|transferase activity, transferring phosphorus-containing groups|recognition of pollen|protein metabolic process|kinase activity|phosphate-containing compound metabolic process|phosphotransferase activity, alcohol group as acceptor|cellular protein modi…	-	-	-	-	Chr11:3302238-3305327	16	11	5	3	2	2	0.749389	0.432522	0.208202	0.130732	0.0829998	0.0863641	0.463371	0.100032	2.21171	0.000761001	0.0144139	UP
Potri.019G099300	-	basic helix-loop-helix (bHLH) DNA-binding superfamily protein	GO:0005515|GO:0003676|GO:0046983|GO:0003677	protein binding|nucleic acid binding|protein dimerization activity|DNA binding	-	-	-	-	Chr19:12918061-12919182	11	14	12	6	3	3	1.64741	1.76037	1.5978	0.836078	0.398186	0.414168	1.66853	0.549477	1.60244	0.000844946	0.0157139	UP
Potri.011G036100	-	S-locus lectin protein kinase family protein	GO:0003824|GO:0008152|GO:0044237|GO:0071704|GO:0016740|GO:0044238|GO:0016772|GO:0048544|GO:0019538|GO:0016301|GO:0006796|GO:0016773|GO:0006464|GO:0016310|GO:0004672|GO:0006468	catalytic activity|metabolic process|cellular metabolic process|organic substance metabolic process|transferase activity|primary metabolic process|transferase activity, transferring phosphorus-containing groups|recognition of pollen|protein metabolic process|kinase activity|phosphate-containing compound metabolic process|phosphotransferase activity, alcohol group as acceptor|cellular protein modi…	-	-	-	-	Chr11:3045823-3049061	6	3	4	14	11	14	0.264635	0.111081	0.156847	0.574628	0.429989	0.569259	0.177521	0.524626	-1.5633	0.000858135	0.0158905	DOWN
Potri.010G077300	NRPE7	RNA polymerase Rpb7-like, N-terminal domain	GO:0003824|GO:0008152|GO:0044237|GO:0071704|GO:0009058|GO:0006807|GO:0016740|GO:0044238|GO:0016772|GO:0006139|GO:0006725|GO:0016070|GO:0016779|GO:0009059|GO:0006351|GO:0003899	catalytic activity|metabolic process|cellular metabolic process|organic substance metabolic process|biosynthetic process|nitrogen compound metabolic process|transferase activity|primary metabolic process|transferase activity, transferring phosphorus-containing groups|nucleobase-containing compound metabolic process|cellular aromatic compound metabolic process|RNA metabolic process|nucleotidyltran…	-	-	-	-	Chr10:10289938-10292830	11	14	12	247	14	11	0.221756	0.236961	0.215078	4.63346	0.250103	0.204426	0.224598	1.696	-2.91671	0.000881412	0.0162616	DOWN
Potri.T021200	-	S-locus lectin protein kinase family protein	GO:0003824|GO:0008152|GO:0044237|GO:0071704|GO:0016740|GO:0044238|GO:0016772|GO:0048544|GO:0019538|GO:0016301|GO:0006796|GO:0016773|GO:0006464|GO:0016310|GO:0004672|GO:0006468	catalytic activity|metabolic process|cellular metabolic process|organic substance metabolic process|transferase activity|primary metabolic process|transferase activity, transferring phosphorus-containing groups|recognition of pollen|protein metabolic process|kinase activity|phosphate-containing compound metabolic process|phosphotransferase activity, alcohol group as acceptor|cellular protein modi…	-	-	-	-	scaffold_29:99569-102843	3	1	0	9	7	6	0.140327	0.0392685	0	0.391772	0.290171	0.258729	0.0598652	0.313558	-2.38894	0.000889851	0.0163672	DOWN
Potri.007G100900	-	Ribosomal L18p/L5e family protein	GO:0005198|GO:0008152|GO:0044237|GO:0005622|GO:0071704|GO:0009058|GO:0003735|GO:0006807|GO:0044238|GO:0005737|GO:0019538|GO:0005840|GO:0009059|GO:0006412|GO:0043043	structural molecule activity|metabolic process|cellular metabolic process|intracellular|organic substance metabolic process|biosynthetic process|structural constituent of ribosome|nitrogen compound metabolic process|primary metabolic process|cytoplasm|protein metabolic process|ribosome|macromolecule biosynthetic process|translation|peptide biosynthetic process	-	-	-	-	Chr07:12639226-12641915	16	145	8	11	10	5	0.344811	2.62341	0.153261	0.220591	0.190972	0.0993339	1.04049	0.170299	2.61113	0.000895659	0.0164439	UP
Potri.008G017100	ATCAT6,CAT6	cationic amino acid transporter 6	GO:0005215|GO:0016020|GO:0022857|GO:0055085|GO:0006810|GO:0034220|GO:0006811|GO:0071705|GO:0006820|GO:0003333|GO:0015171	transporter activity|membrane|transmembrane transporter activity|transmembrane transport|transport|ion transmembrane transport|ion transport|nitrogen compound transport|anion transport|amino acid transmembrane transport|amino acid transmembrane transporter activity	-	-	-	-	Chr08:903165-906833	26	25	34	13	6	19	1.57219	1.26918	1.8278	0.731448	0.32154	1.05912	1.55639	0.704035	1.14448	0.000916483	0.0167547	UP
Potri.T132100	-	-	-	-	-	-	-	-	scaffold_263:23044-23503	17	27	26	12	4	14	4.28383	5.71224	5.82474	2.81385	0.89315	3.2522	5.2736	2.31974	1.18483	0.000918445	0.0167702	UP
Potri.005G154900	-	ATP synthase subunit C family protein	GO:0005215|GO:0016020|GO:0022857|GO:0055085|GO:0033177|GO:0006810|GO:0034220|GO:0006811|GO:0006812|GO:0015992|GO:0015991|GO:0008324|GO:0015078	transporter activity|membrane|transmembrane transporter activity|transmembrane transport|proton-transporting two-sector ATPase complex, proton-transporting domain|transport|ion transmembrane transport|ion transport|cation transport|proton transport|ATP hydrolysis coupled proton transport|cation transmembrane transporter activity|hydrogen ion transmembrane transporter activity	K02110	F-type H+-transporting ATPase subunit c[-]	ko01100|ko01100|ko00190|ko00195	Metabolic pathways|Metabolic pathways|Oxidative phosphorylation|Photosynthesis	Chr05:14825201-14826149	32	32	49	52	61	142	3.90869	3.28153	5.32105	5.91042	6.60284	15.9899	4.17042	9.50104	-1.18789	0.000926504	0.0169	DOWN
Potri.001G007501	-	Toll-Interleukin-Resistance (TIR) domain family protein	-	-	-	-	-	-	Chr01:509409-514364	24	17	26	4	11	13	0.481667	0.286435	0.463882	0.0747055	0.195639	0.240512	0.410661	0.170286	1.26999	0.000970275	0.0175254	UP
Potri.T093800	CIPK21,SnRK3.4	CBL-interacting protein kinase 21	GO:0051716|GO:0007165	cellular response to stimulus|signal transduction	-	-	-	-	scaffold_126:25941-29244	15	11	13	3	4	6	0.84448	0.519908	0.650651	0.157145	0.199538	0.31138	0.67168	0.222688	1.59275	0.000971795	0.0175424	UP
Potri.003G212000	RLK1	receptor-like protein kinase 1	GO:0003824|GO:0008152|GO:0044237|GO:0071704|GO:0016740|GO:0044238|GO:0016772|GO:0000166|GO:0001882|GO:0019538|GO:0016301|GO:0032549|GO:0006796|GO:0016773|GO:0006464|GO:0016310|GO:0005524|GO:0004672|GO:0006468	catalytic activity|metabolic process|cellular metabolic process|organic substance metabolic process|transferase activity|primary metabolic process|transferase activity, transferring phosphorus-containing groups|nucleotide binding|nucleoside binding|protein metabolic process|kinase activity|ribonucleoside binding|phosphate-containing compound metabolic process|phosphotransferase activity, alcohol …	-	-	-	-	Chr03:21054550-21056955	6	4	6	13	21	11	0.289053	0.161775	0.256979	0.582787	0.896614	0.488549	0.235935	0.655983	-1.47527	0.0010223	0.0181918	DOWN
Potri.001G225800	ATCYS6,ATCYSB,CYSB	cystatin B	GO:0030234|GO:0004857|GO:0004866|GO:0004869	enzyme regulator activity|enzyme inhibitor activity|endopeptidase inhibitor activity|cysteine-type endopeptidase inhibitor activity	-	-	-	-	Chr01:23640334-23640847	4	0	0	7	5	12	1.10401	0	0	1.79776	1.22291	3.0533	0.368004	2.02466	-2.45989	0.00102855	0.018282	DOWN
Potri.013G139600	-	NAD(P)H dehydrogenase subunit H	-	-	-	-	-	-	Chr13:14779861-14780816	0	0	0	5	0	11	0	0	0	0.923479	0	2.01275	0	0.978744	#NAME?	0.0010674	0.0188061	DOWN
Potri.005G154600	-	ATP synthase subunit alpha	GO:0003824|GO:0005215|GO:0008152|GO:0016020|GO:0044237|GO:0022857|GO:0071704|GO:0006807|GO:0016787|GO:0044238|GO:0016817|GO:0033178|GO:0000166|GO:0001882|GO:0055085|GO:0006139|GO:0006725|GO:0006810|GO:0009116|GO:0034220|GO:0032549|GO:0016820|GO:0006796|GO:0006811|GO:0006812|GO:0015992|GO:0005524|GO:0015991|GO:0046034	catalytic activity|transporter activity|metabolic process|membrane|cellular metabolic process|transmembrane transporter activity|organic substance metabolic process|nitrogen compound metabolic process|hydrolase activity|primary metabolic process|hydrolase activity, acting on acid anhydrides|proton-transporting two-sector ATPase complex, catalytic domain|nucleotide binding|nucleoside binding|trans…	-	-	-	-	Chr05:14821902-14823423	79	77	162	148	162	416	6.34622	5.19304	11.5696	11.063	11.5324	30.807	7.70295	17.8008	-1.20846	0.00112056	0.0194744	DOWN
Potri.007G143500	-	HXXXD-type acyl-transferase family protein	GO:0003824|GO:0016740|GO:0016746|GO:0016747	catalytic activity|transferase activity|transferase activity, transferring acyl groups|transferase activity, transferring acyl groups other than amino-acyl groups	-	-	-	-	Chr07:15355495-15356760	10	6	8	3	2	0	1.13308	0.570826	0.805854	0.316288	0.200806	0	0.836588	0.172365	2.27905	0.00114145	0.0197415	UP
Potri.018G132200	ATHKT1,HKT1	high-affinity K+ transporter 1	GO:0005215|GO:0022857|GO:0055085|GO:0006810|GO:0006811|GO:0006812|GO:0008324	transporter activity|transmembrane transporter activity|transmembrane transport|transport|ion transport|cation transport|cation transmembrane transporter activity	-	-	-	-	Chr18:15307490-15310842	5	7	5	11	17	17	0.355388	0.417696	0.315942	0.727505	1.07068	1.11386	0.363009	0.970682	-1.41899	0.00114909	0.0198394	DOWN
Potri.016G021400	-	S-adenosyl-L-methionine-dependent methyltransferases superfamily protein	-	-	-	-	-	-	Chr16:1169693-1174547	3	4	4	0	0	0	0.220222	0.246504	0.261048	0	0	0	0.242591	0	Inf	0.00115654	0.0199338	UP
Potri.006G023101	ATUGT85A1,UGT85A1	UDP-Glycosyltransferase superfamily protein	GO:0003824|GO:0008152|GO:0016740|GO:0016757|GO:0016758	catalytic activity|metabolic process|transferase activity|transferase activity, transferring glycosyl groups|transferase activity, transferring hexosyl groups	-	-	-	-	Chr06:1626768-1628824	10	16	9	0	7	3	0.701662	0.942578	0.561438	0	0.435257	0.194047	0.735226	0.209768	1.80939	0.00117897	0.0202625	UP
Potri.006G195300	-	Disease resistance-responsive (dirigent-like protein) family protein	-	-	-	-	-	-	Chr06:21136290-21136924	10	13	4	2	2	2	1.82543	1.99229	0.649125	0.339763	0.323503	0.336616	1.48895	0.333294	2.15943	0.00118852	0.0203917	UP
Potri.007G139600	-	O-acyltransferase (WSD1-like) family protein	GO:0003824|GO:0008152|GO:0044237|GO:0071704|GO:0009058|GO:0016740|GO:0044238|GO:0016746|GO:0006629|GO:0045017|GO:0008610|GO:0016747|GO:0008374|GO:0004144	catalytic activity|metabolic process|cellular metabolic process|organic substance metabolic process|biosynthetic process|transferase activity|primary metabolic process|transferase activity, transferring acyl groups|lipid metabolic process|glycerolipid biosynthetic process|lipid biosynthetic process|transferase activity, transferring acyl groups other than amino-acyl groups|O-acyltransferase activ…	-	-	-	-	Chr07:15072642-15074775	13	14	16	28	48	20	1.05755	0.956157	1.15712	2.11947	3.4602	1.49984	1.05694	2.35983	-1.15879	0.00121727	0.0207666	DOWN
Potri.015G081500	ATNRT2.5,NRT2.5	nitrate transporter2.5	GO:0016020|GO:0016021|GO:0055085|GO:0006810	membrane|integral component of membrane|transmembrane transport|transport	K02575	MFS transporter, NNP family, nitrate/nitrite transporter[-]	ko00910	Nitrogen metabolism	Chr15:10590562-10592703	7	10	9	21	16	22	0.459725	0.551379	0.525493	1.28339	0.931236	1.33202	0.512199	1.18222	-1.20672	0.00121907	0.0207856	DOWN
Potri.006G010200	-	HXXXD-type acyl-transferase family protein	GO:0003824|GO:0016740|GO:0016746|GO:0016747	catalytic activity|transferase activity|transferase activity, transferring acyl groups|transferase activity, transferring acyl groups other than amino-acyl groups	-	-	-	-	Chr06:653109-654409	0	0	0	3	3	5	0	0	0	0.266966	0.254287	0.440855	0	0.320703	#NAME?	0.00123706	0.021021	DOWN
Potri.004G200500	ATOFP6,OFP6	ovate family protein 6	-	-	-	-	-	-	Chr04:21224082-21224683	7	8	6	2	0	2	1.34786	1.2933	1.02706	0.358388	0	0.355068	1.22274	0.237819	2.36219	0.00126168	0.0213451	UP
Potri.007G086100	ATRMR1,RMR1	receptor homology region transmembrane domain ring H2 motif protein 1	GO:0005515|GO:0043169|GO:0046872|GO:0008270	protein binding|cation binding|metal ion binding|zinc ion binding	-	-	-	-	Chr07:11178185-11178679	3	6	5	0	1	0	0.702485	1.17971	1.04101	0	0.207619	0	0.974401	0.0692062	3.81554	0.00126212	0.0213451	UP
Potri.010G004200	HYH	HY5-homolog	GO:0008152|GO:0044237|GO:0003700|GO:0071704|GO:0009058|GO:0006807|GO:0044238|GO:0003676|GO:0006139|GO:0006725|GO:0016070|GO:0003677|GO:0010468|GO:0009059|GO:0006351|GO:0043565|GO:0006355	metabolic process|cellular metabolic process|transcription factor activity, sequence-specific DNA binding|organic substance metabolic process|biosynthetic process|nitrogen compound metabolic process|primary metabolic process|nucleic acid binding|nucleobase-containing compound metabolic process|cellular aromatic compound metabolic process|RNA metabolic process|DNA binding|regulation of gene expres…	-	-	-	-	Chr10:384580-387364	6	8	12	0	2	4	0.661084	0.740085	1.17557	0	0.19527	0.406371	0.858913	0.200547	2.09857	0.00128023	0.021572	UP
Potri.002G256500	-	Leucine-rich repeat transmembrane protein kinase family protein	GO:0003824|GO:0008152|GO:0044237|GO:0005515|GO:0071704|GO:0016740|GO:0044238|GO:0016772|GO:0000166|GO:0001882|GO:0019538|GO:0016301|GO:0032549|GO:0006796|GO:0016773|GO:0006464|GO:0016310|GO:0005524|GO:0004672|GO:0006468	catalytic activity|metabolic process|cellular metabolic process|protein binding|organic substance metabolic process|transferase activity|primary metabolic process|transferase activity, transferring phosphorus-containing groups|nucleotide binding|nucleoside binding|protein metabolic process|kinase activity|ribonucleoside binding|phosphate-containing compound metabolic process|phosphotransferase ac…	-	-	-	-	Chr02:24560822-24563993	5	13	11	16	21	32	0.189424	0.413433	0.370455	0.56401	0.704984	1.11749	0.324438	0.795496	-1.29391	0.00129705	0.0218029	DOWN
Potri.002G151300	AT2301,ATGA20OX1,GA20OX1,GA5	2-oxoglutarate (2OG) and Fe(II)-dependent oxygenase superfamily protein	GO:0003824|GO:0008152|GO:0016491|GO:0055114	catalytic activity|metabolic process|oxidoreductase activity|oxidation-reduction process	K05282	gibberellin 20-oxidase[1.14.11.12]	ko01100|ko01100|ko01110|ko00904	Metabolic pathways|Metabolic pathways|Biosynthesis of secondary metabolites|Diterpenoid biosynthesis	Chr02:11404558-11405973	0	0	0	5	4	2	0	0	0	0.478537	0.364551	0.189664	0	0.344251	#NAME?	0.00130071	0.0218316	DOWN
Potri.002G230300	-	-	-	-	-	-	-	-	Chr02:22192937-22194194	7	3	8	20	12	16	0.730346	0.262756	0.742024	1.94172	1.10951	1.53894	0.578376	1.53006	-1.40351	0.0013007	0.0218316	DOWN
Potri.014G059300	-	PLATZ transcription factor family protein	GO:0005622|GO:0043169|GO:0046872|GO:0008270	intracellular|cation binding|metal ion binding|zinc ion binding	-	-	-	-	Chr14:4602713-4604011	13	10	9	2	1	6	2.03375	1.31334	1.25168	0.29116	0.138693	0.865225	1.53292	0.431692	1.82821	0.00130549	0.0218753	UP
Potri.005G232400	-	Mannose-binding lectin superfamily protein	GO:0008152|GO:0044237|GO:0071704|GO:0009058|GO:0006807|GO:0080028|GO:0019762	metabolic process|cellular metabolic process|organic substance metabolic process|biosynthetic process|nitrogen compound metabolic process|nitrile biosynthetic process|glucosinolate catabolic process	-	-	-	-	Chr05:24070257-24073267	9	6	14	20	21	23	0.355113	0.198759	0.491081	0.734257	0.734259	0.836567	0.348318	0.768361	-1.14138	0.00132231	0.0220737	DOWN
Potri.005G160800	-	ENTH/ANTH/VHS superfamily protein	GO:0008289|GO:0005543	lipid binding|phospholipid binding	-	-	-	-	Chr05:16241641-16242775	14	25	25	10	8	11	1.42981	2.14363	2.26995	0.950329	0.724067	1.03564	1.94779	0.903344	1.10849	0.00135328	0.0224514	UP
Potri.004G126700	ATMYB96,MYB96,MYBCOV1	myb domain protein 96	-	-	-	-	-	-	Chr04:12466740-12468284	8	8	8	18	15	23	0.801529	0.672921	0.712523	1.67804	1.33177	2.12432	0.728991	1.71138	-1.23119	0.00135837	0.0225234	DOWN
Potri.004G232250	-	Leucine-rich repeat protein kinase family protein	GO:0003824|GO:0008152|GO:0044237|GO:0071704|GO:0006807|GO:0016740|GO:0044238|GO:0016772|GO:0006139|GO:0006725|GO:0019538|GO:0016301|GO:0006796|GO:0016773|GO:0006259|GO:0015074|GO:0006464|GO:0016310|GO:0004672|GO:0006468	catalytic activity|metabolic process|cellular metabolic process|organic substance metabolic process|nitrogen compound metabolic process|transferase activity|primary metabolic process|transferase activity, transferring phosphorus-containing groups|nucleobase-containing compound metabolic process|cellular aromatic compound metabolic process|protein metabolic process|kinase activity|phosphate-contai…	-	-	-	-	Chr04:23866499-23881611	4	2	5	11	12	11	0.0447011	0.0187617	0.0496772	0.114389	0.118834	0.113318	0.0377133	0.115514	-1.61492	0.00137282	0.0227004	DOWN
Potri.009G115200	-	Protein kinase superfamily protein	GO:0003824|GO:0008152|GO:0044237|GO:0071704|GO:0016740|GO:0044238|GO:0016772|GO:0019538|GO:0016301|GO:0006796|GO:0016773|GO:0006464|GO:0016310|GO:0004672|GO:0006468	catalytic activity|metabolic process|cellular metabolic process|organic substance metabolic process|transferase activity|primary metabolic process|transferase activity, transferring phosphorus-containing groups|protein metabolic process|kinase activity|phosphate-containing compound metabolic process|phosphotransferase activity, alcohol group as acceptor|cellular protein modification process|phosp…	-	-	-	-	Chr09:9747655-9751544	3	6	2	0	0	0	0.136472	0.229182	0.0808859	0	0	0	0.148846	0	Inf	0.00138845	0.0228917	UP
Potri.008G205000	-	Uncharacterised protein family (UPF0497)	-	-	-	-	-	-	Chr08:14815260-14818094	27	32	19	14	12	12	4.54918	4.52641	2.84607	2.19495	1.79166	1.86393	3.97389	1.95018	1.02694	0.00140197	0.0230356	UP
Potri.007G073800	-	Major facilitator superfamily protein	GO:0016020|GO:0016021|GO:0055085|GO:0006810	membrane|integral component of membrane|transmembrane transport|transport	-	-	-	-	Chr07:9638194-9640210	0	0	0	3	6	2	0	0	0	0.185529	0.353435	0.122564	0	0.220509	#NAME?	0.00142496	0.023277	DOWN
Potri.013G042900	-	Alba DNA/RNA-binding protein	GO:0003676	nucleic acid binding	-	-	-	-	Chr13:3025862-3028013	2	3	6	0	0	0	0.469183	0.590935	1.2516	0	0	0	0.770574	0	Inf	0.00143498	0.0233819	UP
Potri.003G193800	-	-	-	-	-	-	-	-	Chr03:19748846-19752406	19	23	33	12	13	11	0.354722	0.360509	0.547718	0.208467	0.215081	0.189314	0.420983	0.204287	1.04316	0.00145613	0.0235989	UP
Potri.001G115400	-	MATE efflux family protein	GO:0005215|GO:0016020|GO:0022857|GO:0055085|GO:0015238|GO:0006810|GO:0006855|GO:0015297	transporter activity|membrane|transmembrane transporter activity|transmembrane transport|drug transmembrane transporter activity|transport|drug transmembrane transport|antiporter activity	-	-	-	-	Chr01:9238760-9240286	15	11	10	24	22	28	1.13869	0.701042	0.67492	1.69531	1.47996	1.9595	0.838218	1.71159	-1.02994	0.00148249	0.0239293	DOWN
Potri.003G158701	-	ARM repeat superfamily protein	-	-	-	-	-	-	Chr03:17076398-17078677	11	10	9	21	25	18	1.2932	0.987002	0.940665	2.29735	2.60457	1.95083	1.07362	2.28425	-1.08923	0.00151492	0.0243421	DOWN
Potri.001G077700	-	-	-	-	-	-	-	-	Chr01:6155798-6156937	0	0	0	3	8	1	0	0	0	0.422405	1.07287	0.139445	0	0.544905	#NAME?	0.00152837	0.0245321	DOWN
Potri.T064000	-	Protein kinase family protein	GO:0003824|GO:0008152|GO:0044237|GO:0030246|GO:0071704|GO:0016740|GO:0044238|GO:0016772|GO:0030247|GO:0019538|GO:0016301|GO:0006796|GO:0016773|GO:0006464|GO:0016310|GO:0004672|GO:0006468	catalytic activity|metabolic process|cellular metabolic process|carbohydrate binding|organic substance metabolic process|transferase activity|primary metabolic process|transferase activity, transferring phosphorus-containing groups|polysaccharide binding|protein metabolic process|kinase activity|phosphate-containing compound metabolic process|phosphotransferase activity, alcohol group as acceptor…	-	-	-	-	scaffold_67:31053-38366	2	10	8	1	0	2	0.0333443	0.140006	0.1186	0.0155104	0	0.0307511	0.0973169	0.0154205	2.65784	0.00157327	0.0249998	UP
Potri.019G040200	CAX7	calcium exchanger 7	GO:0016020|GO:0016021|GO:0055085|GO:0006810	membrane|integral component of membrane|transmembrane transport|transport	-	-	-	-	Chr19:4597994-4599748	3	3	3	8	11	11	0.198137	0.166337	0.176185	0.491666	0.643881	0.669771	0.18022	0.601773	-1.73946	0.00159457	0.0252318	DOWN
Potri.012G101000	ATWRKY75,WRKY75	WRKY DNA-binding protein 75	GO:0008152|GO:0044237|GO:0003700|GO:0071704|GO:0009058|GO:0006807|GO:0044238|GO:0003676|GO:0006139|GO:0006725|GO:0016070|GO:0003677|GO:0010468|GO:0009059|GO:0006351|GO:0043565|GO:0006355	metabolic process|cellular metabolic process|transcription factor activity, sequence-specific DNA binding|organic substance metabolic process|biosynthetic process|nitrogen compound metabolic process|primary metabolic process|nucleic acid binding|nucleobase-containing compound metabolic process|cellular aromatic compound metabolic process|RNA metabolic process|DNA binding|regulation of gene expres…	-	-	-	-	Chr12:12608386-12609465	3	1	2	11	8	6	0.533329	0.149244	0.3161	1.81988	1.26045	0.98333	0.332891	1.35455	-2.0247	0.00160296	0.0253114	DOWN
Potri.T065800	RPS2	NB-ARC domain-containing disease resistance protein	-	-	-	-	-	-	scaffold_68:19253-21820	1	4	2	9	12	6	0.0512391	0.171997	0.0910726	0.428993	0.544704	0.28331	0.10477	0.419002	-1.99974	0.00161288	0.0254545	DOWN
Potri.004G235500	-	NAD(P)-binding Rossmann-fold superfamily protein	GO:0003824|GO:0008152|GO:0016491	catalytic activity|metabolic process|oxidoreductase activity	K15095	(+)-neomenthol dehydrogenase[1.1.1.208]	ko01110|ko00902	Biosynthesis of secondary metabolites|Monoterpenoid biosynthesis	Chr04:24141641-24143027	10	10	13	20	19	34	0.861178	0.723019	0.995312	1.60271	1.45001	2.69932	0.859836	1.91734	-1.15698	0.00164012	0.0257631	DOWN
Potri.017G064100	RHS19	root hair specific 19	GO:0016209|GO:0003824|GO:0008152|GO:0016491|GO:0004601|GO:0006950|GO:0055114|GO:0006979|GO:0020037	antioxidant activity|catalytic activity|metabolic process|oxidoreductase activity|peroxidase activity|response to stress|oxidation-reduction process|response to oxidative stress|heme binding	K00430	peroxidase[1.11.1.7]	ko01100|ko01100|ko01110|ko00940	Metabolic pathways|Metabolic pathways|Biosynthesis of secondary metabolites|Phenylpropanoid biosynthesis	Chr17:6139320-6141574	5	6	5	0	0	2	0.536206	0.540199	0.476689	0	0	0.197735	0.517698	0.0659115	2.97351	0.00166824	0.0260959	UP
Potri.011G128600	-	S-locus lectin protein kinase family protein	GO:0003824|GO:0008152|GO:0044237|GO:0071704|GO:0016740|GO:0044238|GO:0016772|GO:0048544|GO:0019538|GO:0016301|GO:0006796|GO:0016773|GO:0006464|GO:0016310|GO:0004672|GO:0006468	catalytic activity|metabolic process|cellular metabolic process|organic substance metabolic process|transferase activity|primary metabolic process|transferase activity, transferring phosphorus-containing groups|recognition of pollen|protein metabolic process|kinase activity|phosphate-containing compound metabolic process|phosphotransferase activity, alcohol group as acceptor|cellular protein modi…	-	-	-	-	Chr11:15357460-15359975	6	6	10	12	32	16	0.404573	0.339706	0.599536	0.75298	1.91224	0.994628	0.447938	1.21995	-1.44545	0.00170341	0.0265231	DOWN
Potri.013G141900	ATGER1,GER1,GLP1	germin-like protein 1	-	-	-	-	-	-	Chr13:14855716-14856477	9	9	14	4	3	3	1.36919	1.14944	1.89343	0.566271	0.404456	0.42069	1.47069	0.463806	1.6649	0.00176176	0.02715	UP
Potri.018G096000	UGT78D2	UDP-glucosyl transferase 78D2	GO:0003824|GO:0008152|GO:0016740|GO:0016757|GO:0016758	catalytic activity|metabolic process|transferase activity|transferase activity, transferring glycosyl groups|transferase activity, transferring hexosyl groups	-	-	-	-	Chr18:12460135-12463533	13	16	11	4	6	5	0.658369	0.68027	0.495235	0.18851	0.269284	0.233428	0.611292	0.230407	1.40767	0.00179769	0.0275729	UP
Potri.019G111000	ATHM4,ATM4,TRX-M4	thioredoxin M-type 4	GO:0003824|GO:0008152|GO:0016491|GO:0071704|GO:0045454|GO:0006662|GO:0015035	catalytic activity|metabolic process|oxidoreductase activity|organic substance metabolic process|cell redox homeostasis|glycerol ether metabolic process|protein disulfide oxidoreductase activity	K03671	thioredoxin 1[-]	ko05418	Fluid shear stress and atherosclerosis	Chr19:14023308-14023855	4	5	7	0	2	0	1.33243	1.39841	2.07298	0	0.5903	0	1.60127	0.196767	3.02466	0.00182514	0.0278923	UP
Potri.T024000	-	Calcium-binding EF-hand family protein	-	-	-	-	-	-	scaffold_29:472483-472900	11	8	11	21	21	21	3.05048	1.86261	2.71194	5.4191	5.16089	5.36862	2.54168	5.3162	-1.06462	0.00182659	0.0278923	DOWN
Potri.010G041300	-	Protein of unknown function (DUF1645)	-	-	-	-	-	-	Chr10:7133951-7135274	12	12	10	27	25	18	1.05064	0.882023	0.7784	2.19963	1.93965	1.45281	0.903689	1.86403	-1.04453	0.00184452	0.0280949	DOWN
Potri.006G177250	-	-	-	-	-	-	-	-	Chr06:19052092-19056145	7	6	5	10	18	18	0.382923	0.27558	0.243181	0.509025	0.872608	0.907747	0.300562	0.763127	-1.34426	0.00185884	0.0282131	DOWN
Potri.013G051000	ATLTL1,LTL1	Li-tolerant lipase 1	GO:0003824|GO:0016787|GO:0016788	catalytic activity|hydrolase activity|hydrolase activity, acting on ester bonds	-	-	-	-	Chr13:3721393-3724829	7	0	0	14	9	10	0.456621	0	0	0.849816	0.520242	0.60137	0.152207	0.657142	-2.11017	0.00186893	0.0282808	DOWN
Potri.T144300	-	Cellulase (glycosyl hydrolase family 5) protein	GO:0003824|GO:0008152|GO:0071704|GO:0016787|GO:0044238|GO:0005975|GO:0016798|GO:0004553	catalytic activity|metabolic process|organic substance metabolic process|hydrolase activity|primary metabolic process|carbohydrate metabolic process|hydrolase activity, acting on glycosyl bonds|hydrolase activity, hydrolyzing O-glycosyl compounds	-	-	-	-	scaffold_407:18214-20237	14	33	30	14	14	6	0.925744	1.83205	1.76366	0.86145	0.820359	0.365734	1.50715	0.682514	1.14289	0.00200823	0.0297434	UP
Potri.T172036	ATNRPD1B,DMS5,DRD3,NRPD1B,NRPE1	nuclear RNA polymerase D1B	GO:0003824|GO:0008152|GO:0044237|GO:0071704|GO:0009058|GO:0006807|GO:0016740|GO:0044238|GO:0016772|GO:0003676|GO:0006139|GO:0006725|GO:0016070|GO:0003677|GO:0016779|GO:0009059|GO:0006351|GO:0003899	catalytic activity|metabolic process|cellular metabolic process|organic substance metabolic process|biosynthetic process|nitrogen compound metabolic process|transferase activity|primary metabolic process|transferase activity, transferring phosphorus-containing groups|nucleic acid binding|nucleobase-containing compound metabolic process|cellular aromatic compound metabolic process|RNA metabolic pr…	-	-	-	-	scaffold_500:12919-21068	0	0	0	6	6	0	0	0	0	0.229966	0.219045	0	0	0.14967	#NAME?	0.00201715	0.0297905	DOWN
Potri.008G026700	ATGAT1,GAT1	Transmembrane amino acid transporter family protein	-	-	-	-	-	-	Chr08:1418325-1420564	0	0	2	6	9	2	0	0	0.135323	0.424901	0.607005	0.140349	0.0451077	0.390752	-3.11481	0.0020488	0.0301103	DOWN
Potri.013G142366	-	DNA-directed RNA polymerase family protein	GO:0003824|GO:0008152|GO:0044237|GO:0071704|GO:0009058|GO:0006807|GO:0016740|GO:0044238|GO:0016772|GO:0003676|GO:0006139|GO:0006725|GO:0016070|GO:0003677|GO:0016779|GO:0009059|GO:0006351|GO:0003899	catalytic activity|metabolic process|cellular metabolic process|organic substance metabolic process|biosynthetic process|nitrogen compound metabolic process|transferase activity|primary metabolic process|transferase activity, transferring phosphorus-containing groups|nucleic acid binding|nucleobase-containing compound metabolic process|cellular aromatic compound metabolic process|RNA metabolic pr…	-	-	-	-	Chr13:14875570-14876088	2	5	4	6	10	28	0.446582	0.937663	0.794209	1.24687	1.97927	5.76522	0.726152	2.99712	-2.04523	0.00208227	0.0304981	DOWN
Potri.018G077000	-	O-Glycosyl hydrolases family 17 protein	GO:0003824|GO:0008152|GO:0071704|GO:0016787|GO:0044238|GO:0005975|GO:0016798|GO:0004553	catalytic activity|metabolic process|organic substance metabolic process|hydrolase activity|primary metabolic process|carbohydrate metabolic process|hydrolase activity, acting on glycosyl bonds|hydrolase activity, hydrolyzing O-glycosyl compounds	-	-	-	-	Chr18:10260045-10261985	15	27	14	6	10	8	1.07798	1.62903	0.89448	0.401193	0.636851	0.529995	1.2005	0.52268	1.19963	0.00209415	0.0306424	UP
Potri.019G028600	-	ATPase, F0 complex, subunit A protein	GO:0005215|GO:0008152|GO:0044237|GO:0022857|GO:0071704|GO:0009058|GO:0006807|GO:0044238|GO:0055085|GO:0006139|GO:0006725|GO:0006810|GO:0009116|GO:0034220|GO:1901137|GO:0006796|GO:0006811|GO:0009165|GO:0006812|GO:0015992|GO:0008324|GO:0006164|GO:0046034|GO:0015078|GO:0015986|GO:0006754	transporter activity|metabolic process|cellular metabolic process|transmembrane transporter activity|organic substance metabolic process|biosynthetic process|nitrogen compound metabolic process|primary metabolic process|transmembrane transport|nucleobase-containing compound metabolic process|cellular aromatic compound metabolic process|transport|nucleoside metabolic process|ion transmembrane tran…	K02108	F-type H+-transporting ATPase subunit a[-]	ko01100|ko01100|ko00190|ko00195	Metabolic pathways|Metabolic pathways|Oxidative phosphorylation|Photosynthesis	Chr19:3203146-3203886	14	15	40	45	35	93	2.19005	1.97008	5.56299	6.55051	4.85201	13.4118	3.24104	8.27144	-1.35168	0.00210635	0.030776	DOWN
Potri.T058700	-	CemA-like proton extrusion protein-related	GO:0016020|GO:0016021	membrane|integral component of membrane	-	-	-	-	scaffold_56:82329-83015	8	12	20	20	25	57	1.34988	1.69985	3.00013	3.1401	3.73814	8.86625	2.01662	5.24816	-1.37987	0.002249	0.0324666	DOWN
Potri.019G125100	-	-	-	-	-	-	-	-	Chr19:15281539-15282117	16	37	19	13	5	12	3.20335	6.21902	3.38186	2.42174	0.887082	2.21483	4.26808	1.84122	1.21293	0.00226048	0.0325544	UP
Potri.002G211100	-	ATP synthase subunit beta	GO:0003824|GO:0005215|GO:0016020|GO:0022857|GO:0016787|GO:0016817|GO:0033178|GO:0055085|GO:0006810|GO:0034220|GO:0016820|GO:0006811|GO:0006812|GO:0015992|GO:0015991	catalytic activity|transporter activity|membrane|transmembrane transporter activity|hydrolase activity|hydrolase activity, acting on acid anhydrides|proton-transporting two-sector ATPase complex, catalytic domain|transmembrane transport|transport|ion transmembrane transport|hydrolase activity, acting on acid anhydrides, catalyzing transmembrane movement of substances|ion transport|cation transpor…	-	-	-	-	Chr02:18302824-18303055	2	5	6	9	11	18	0.999035	2.09762	2.66505	4.18453	4.87074	8.29102	1.92057	5.7821	-1.59006	0.002273	0.0326878	DOWN
Potri.002G094800	-	tetratricopeptide repeat (TPR)-containing protein	GO:0005515	protein binding	-	-	-	-	Chr02:6820123-6823033	10	14	16	8	3	4	0.583952	0.68641	0.830677	0.434697	0.155262	0.215366	0.700346	0.268442	1.38346	0.00227675	0.0327262	UP
Potri.011G033901	ARK2,RK2	receptor kinase 2	GO:0003824|GO:0008152|GO:0044237|GO:0071704|GO:0016740|GO:0044238|GO:0016772|GO:0019538|GO:0016301|GO:0006796|GO:0016773|GO:0006464|GO:0016310|GO:0004672|GO:0006468	catalytic activity|metabolic process|cellular metabolic process|organic substance metabolic process|transferase activity|primary metabolic process|transferase activity, transferring phosphorus-containing groups|protein metabolic process|kinase activity|phosphate-containing compound metabolic process|phosphotransferase activity, alcohol group as acceptor|cellular protein modification process|phosp…	-	-	-	-	Chr11:2800590-2801756	3	3	4	0	0	0	0.360342	0.30251	0.427144	0	0	0	0.363332	0	Inf	0.00228077	0.0327613	UP
Potri.015G108500	-	-	-	-	-	-	-	-	Chr15:12558887-12561668	1	0	2	10	3	6	0.051881	0	0.0922135	0.482606	0.137895	0.28686	0.0480315	0.302453	-2.65466	0.00234082	0.033408	DOWN
Potri.003G121100	-	-	-	-	-	-	-	-	Chr03:14347067-14349909	8	20	25	8	6	6	0.628299	1.31868	1.74552	0.584603	0.417609	0.434371	1.23083	0.478861	1.36196	0.00234745	0.0334392	UP
Potri.005G202200	ATGPAT1,GPAT1	glycerol-3-phosphate acyltransferase 1	GO:0003824|GO:0008152|GO:0016740|GO:0016746	catalytic activity|metabolic process|transferase activity|transferase activity, transferring acyl groups	K13508	glycerol-3-phosphate acyltransferase[2.3.1.15]	ko01100|ko01100|ko01110|ko00564|ko00561	Metabolic pathways|Metabolic pathways|Biosynthesis of secondary metabolites|Glycerophospholipid metabolism|Glycerolipid metabolism	Chr05:21742557-21744882	4	6	3	0	1	0	0.262562	0.330665	0.175087	0	0.0581943	0	0.256105	0.0193981	3.72275	0.00237959	0.0337534	UP
Potri.019G006150	-	Leucine-rich repeat transmembrane protein kinase	GO:0003824|GO:0008152|GO:0044237|GO:0005515|GO:0071704|GO:0016740|GO:0044238|GO:0016772|GO:0019538|GO:0016301|GO:0006796|GO:0016773|GO:0006464|GO:0016310|GO:0004672|GO:0006468	catalytic activity|metabolic process|cellular metabolic process|protein binding|organic substance metabolic process|transferase activity|primary metabolic process|transferase activity, transferring phosphorus-containing groups|protein metabolic process|kinase activity|phosphate-containing compound metabolic process|phosphotransferase activity, alcohol group as acceptor|cellular protein modificati…	-	-	-	-	Chr19:717153-731201	7	4	0	7	15	15	0.267529	0.128332	0	0.248949	0.508032	0.528503	0.131953	0.428495	-1.69925	0.00238726	0.0337986	DOWN
Potri.T147401	-	oxidoreductase, 2OG-Fe(II) oxygenase family protein	-	-	-	-	-	-	scaffold_479:16833-18665	2	5	3	0	0	0	0.167832	0.352388	0.223899	0	0	0	0.248039	0	Inf	0.00242659	0.0341947	UP
Potri.015G121300	-	-	-	-	-	-	-	-	Chr15:13565623-13566992	0	0	0	3	5	2	0	0	0	1.14738	1.82135	0.757983	0	1.24224	#NAME?	0.00248052	0.0347111	DOWN
Potri.008G061700	-	-	-	-	-	-	-	-	Chr08:3713079-3714760	8	6	8	15	17	18	0.821407	0.517232	0.730194	1.43307	1.54675	1.70373	0.689611	1.56119	-1.17879	0.00249993	0.0349503	DOWN
Potri.007G100500	ATNHX7,ATSOS1,SOS1	sodium proton exchanger, putative (NHX7) (SOS1)	-	-	-	-	-	-	Chr07:12614077-12616889	0	2	3	8	5	9	0	0.0663761	0.105458	0.294295	0.175177	0.328	0.0572782	0.265824	-2.21442	0.00256449	0.0355722	DOWN
Potri.004G194850	-	NB-ARC domain-containing disease resistance protein	GO:0000166|GO:0001882|GO:0032549|GO:0043531	nucleotide binding|nucleoside binding|ribonucleoside binding|ADP binding	-	-	-	-	Chr04:20862368-20863543	3	10	17	38	32	12	0.295689	0.827538	1.4897	3.48543	2.79519	1.09046	0.870975	2.45703	-1.49621	0.00256983	0.0356172	DOWN
Potri.001G026400	-	Calcium-dependent ARF-type GTPase activating protein family	GO:0030234|GO:0005515|GO:0005096	enzyme regulator activity|protein binding|GTPase activator activity	K12486	stromal membrane-associated protein[-]	ko04144	Endocytosis	Chr01:1938376-1944568	5	10	5	1	0	3	0.294083	0.493751	0.261441	0.0546996	0	0.162641	0.349759	0.0724469	2.27136	0.00274253	0.0373539	UP
Potri.T025230	-	NB-ARC domain-containing disease resistance protein	GO:0005515|GO:0000166|GO:0001882|GO:0032549|GO:0043531	protein binding|nucleotide binding|nucleoside binding|ribonucleoside binding|ADP binding	-	-	-	-	scaffold_30:101140-118310	12	11	9	23	27	16	0.358611	0.275971	0.239107	0.639581	0.715011	0.440775	0.29123	0.598455	-1.03909	0.00281979	0.0381046	DOWN
Potri.002G258100	EDA23,GSO2	Leucine-rich repeat transmembrane protein kinase	GO:0005515	protein binding	-	-	-	-	Chr02:24679245-24681600	0	2	3	9	9	4	0	0.0975513	0.154989	0.486622	0.463393	0.214287	0.0841802	0.388101	-2.20488	0.00295709	0.0394209	DOWN
Potri.007G143100	-	Disease resistance protein (TIR-NBS-LRR class) family	GO:0005515|GO:0051716|GO:0000166|GO:0001882|GO:0007165|GO:0032549|GO:0043531	protein binding|cellular response to stimulus|nucleotide binding|nucleoside binding|signal transduction|ribonucleoside binding|ADP binding	-	-	-	-	Chr07:15278353-15281912	12	12	8	24	24	17	0.349072	0.293049	0.206873	0.649622	0.618652	0.455885	0.282998	0.57472	-1.02207	0.00301394	0.040037	DOWN
Potri.019G016200	-	S-adenosyl-L-methionine-dependent methyltransferases superfamily protein	GO:0003824|GO:0016740|GO:0008168	catalytic activity|transferase activity|methyltransferase activity	-	-	-	-	Chr19:1771425-1773369	17	10	17	6	8	3	1.75629	0.867366	1.56139	0.57676	0.732456	0.285709	1.39502	0.531642	1.39176	0.0030267	0.0401534	UP
Potri.T131000	CHY1	beta-hydroxyisobutyryl-CoA hydrolase 1	-	-	-	-	-	-	scaffold_250:43054-47546	0	0	0	0	5	6	0	0	0	0	0.377107	0.470728	0	0.282612	#NAME?	0.00307219	0.0406495	DOWN
Potri.010G188000	-	2-oxoglutarate (2OG) and Fe(II)-dependent oxygenase superfamily protein	GO:0003824|GO:0008152|GO:0016491|GO:0055114	catalytic activity|metabolic process|oxidoreductase activity|oxidation-reduction process	-	-	-	-	Chr10:18395984-18399606	4	2	4	13	7	11	0.274045	0.115021	0.243614	0.828715	0.424967	0.694709	0.210893	0.649464	-1.62274	0.0030848	0.0407806	DOWN
Potri.014G030500	CML37,CML39	calmodulin like 37	GO:0043169|GO:0046872|GO:0005509	cation binding|metal ion binding|calcium ion binding	-	-	-	-	Chr14:2557643-2558143	1	0	0	7	4	2	0.231445	0	0	1.50711	0.820058	0.426649	0.0771485	0.917938	-3.57269	0.00309512	0.0408632	DOWN
Potri.018G002600	-	Leucine-rich repeat protein kinase family protein	GO:0003824|GO:0008152|GO:0044237|GO:0005515|GO:0071704|GO:0016740|GO:0044238|GO:0016772|GO:0000166|GO:0001882|GO:0019538|GO:0016301|GO:0032549|GO:0006796|GO:0016773|GO:0006464|GO:0016310|GO:0005524|GO:0004672|GO:0006468	catalytic activity|metabolic process|cellular metabolic process|protein binding|organic substance metabolic process|transferase activity|primary metabolic process|transferase activity, transferring phosphorus-containing groups|nucleotide binding|nucleoside binding|protein metabolic process|kinase activity|ribonucleoside binding|phosphate-containing compound metabolic process|phosphotransferase ac…	-	-	-	-	Chr18:174610-177039	11	9	12	4	4	3	0.665153	0.4569	0.645122	0.225091	0.214319	0.167223	0.589058	0.202211	1.54255	0.00309391	0.0408632	UP
Potri.013G138000	-	ATP synthase subunit alpha	GO:0003824|GO:0005215|GO:0008152|GO:0016020|GO:0044237|GO:0022857|GO:0071704|GO:0006807|GO:0016787|GO:0044238|GO:0016817|GO:0033178|GO:0000166|GO:0001882|GO:0055085|GO:0006139|GO:0006725|GO:0006810|GO:0009116|GO:0034220|GO:0032549|GO:0016820|GO:0006796|GO:0006811|GO:0006812|GO:0015992|GO:0005524|GO:0015991|GO:0046034	catalytic activity|transporter activity|metabolic process|membrane|cellular metabolic process|transmembrane transporter activity|organic substance metabolic process|nitrogen compound metabolic process|hydrolase activity|primary metabolic process|hydrolase activity, acting on acid anhydrides|proton-transporting two-sector ATPase complex, catalytic domain|nucleotide binding|nucleoside binding|trans…	K02111	F-type H+-transporting ATPase subunit alpha[3.6.3.14]	ko01100|ko01100|ko00190|ko00195	Metabolic pathways|Metabolic pathways|Oxidative phosphorylation|Photosynthesis	Chr13:14719972-14721495	15	24	32	33	36	85	1.14093	1.53262	2.1639	2.33567	2.42658	5.96015	1.61248	3.57413	-1.14831	0.00310521	0.040937	DOWN
Potri.013G128950	-	-	-	-	-	-	-	-	Chr13:14111369-14112953	8	9	13	21	21	19	2.27296	2.14676	3.28355	5.55192	5.28738	4.9763	2.56776	5.27187	-1.03781	0.00318657	0.0415504	DOWN
Potri.010G175700	-	Phenazine biosynthesis PhzC/PhzF protein	GO:0003824|GO:0008152|GO:0009058	catalytic activity|metabolic process|biosynthetic process	-	-	-	-	Chr10:17592661-17594795	6	5	0	0	0	0	0.723684	0.506397	0	0	0	0	0.410027	0	Inf	0.00326446	0.042211	UP
Potri.005G036600	-	Protein kinase superfamily protein	GO:0003824|GO:0008152|GO:0044237|GO:0071704|GO:0016740|GO:0044238|GO:0016772|GO:0019538|GO:0016301|GO:0006796|GO:0016773|GO:0006464|GO:0016310|GO:0004672|GO:0006468	catalytic activity|metabolic process|cellular metabolic process|organic substance metabolic process|transferase activity|primary metabolic process|transferase activity, transferring phosphorus-containing groups|protein metabolic process|kinase activity|phosphate-containing compound metabolic process|phosphotransferase activity, alcohol group as acceptor|cellular protein modification process|phosp…	-	-	-	-	Chr05:2687397-2689693	5	7	5	2	1	0	0.337982	0.397237	0.300467	0.125801	0.0599249	0	0.345229	0.0619088	2.47934	0.00328247	0.0423711	UP
Potri.001G261201	scpl40	serine carboxypeptidase-like 40	GO:0003824|GO:0008152|GO:0071704|GO:0016787|GO:0044238|GO:0008233|GO:0019538|GO:0006508|GO:0008236|GO:0070008|GO:0004185	catalytic activity|metabolic process|organic substance metabolic process|hydrolase activity|primary metabolic process|peptidase activity|protein metabolic process|proteolysis|serine-type peptidase activity|serine-type exopeptidase activity|serine-type carboxypeptidase activity	-	-	-	-	Chr01:27066597-27069166	11	12	20	5	8	4	1.89747	1.7378	3.0671	0.802547	1.22294	0.636164	2.23412	0.887217	1.33235	0.00331669	0.0427762	UP
Potri.015G128400	-	Plant invertase/pectin methylesterase inhibitor superfamily protein	GO:0030234|GO:0004857	enzyme regulator activity|enzyme inhibitor activity	-	-	-	-	Chr15:14028406-14029141	8	5	7	23	15	11	1.26001	0.661206	0.980161	3.37083	2.09356	1.59708	0.967126	2.35382	-1.28323	0.00334121	0.0429415	DOWN
Potri.004G030400	ATTPS14,TPS14	terpene synthase 14	GO:0003824|GO:0008152|GO:0016829|GO:0043169|GO:0046872|GO:0000287|GO:0010333	catalytic activity|metabolic process|lyase activity|cation binding|metal ion binding|magnesium ion binding|terpene synthase activity	K15086	(3S)-linalool synthase[4.2.3.25]	ko01110|ko01130|ko00902	Biosynthesis of secondary metabolites|Biosynthesis of antibiotics|Monoterpenoid biosynthesis	Chr04:2211131-2213832	0	2	0	6	3	6	0	0.117877	0	0.391959	0.186672	0.388329	0.0392923	0.32232	-3.03618	0.0033704	0.0431549	DOWN
Potri.006G269900	-	Disease resistance protein (TIR-NBS-LRR class) family	GO:0000166|GO:0001882|GO:0032549|GO:0043531	nucleotide binding|nucleoside binding|ribonucleoside binding|ADP binding	-	-	-	-	Chr06:27176139-27178879	5	0	0	8	8	6	0.234482	0	0	0.349059	0.33245	0.259357	0.0781605	0.313622	-2.00451	0.00341901	0.0436659	DOWN
Potri.002G109601	AGL16	AGAMOUS-like 16	GO:0008152|GO:0044237|GO:0005622|GO:0003700|GO:0071704|GO:0009058|GO:0006807|GO:0044238|GO:0006139|GO:0006725|GO:0043231|GO:0016070|GO:0010468|GO:0005634|GO:0009059|GO:0006351|GO:0006355	metabolic process|cellular metabolic process|intracellular|transcription factor activity, sequence-specific DNA binding|organic substance metabolic process|biosynthetic process|nitrogen compound metabolic process|primary metabolic process|nucleobase-containing compound metabolic process|cellular aromatic compound metabolic process|intracellular membrane-bounded organelle|RNA metabolic process|reg…	-	-	-	-	Chr02:8070056-8076275	0	4	7	0	0	0	0	0.0513834	0.0952341	0	0	0	0.0488725	0	Inf	0.00347426	0.0441098	UP
Potri.017G050000	-	-	-	-	-	-	-	-	Chr17:4172805-4174880	9	14	6	2	3	4	1.3874	1.81187	0.822196	0.286901	0.409835	0.568487	1.34049	0.421741	1.66833	0.00350097	0.0443741	UP
Potri.002G166900	-	Protein of unknown function (DUF1191)	-	-	-	-	-	-	Chr02:12613649-12615077	2	7	6	1	1	0	0.162195	0.47674	0.432674	0.0754463	0.0719183	0	0.357203	0.0491215	2.86232	0.00351174	0.0444545	UP
Potri.T051200	AtPLAIVA,PLA IVA,PLP1	Acyl transferase/acyl hydrolase/lysophospholipase superfamily protein	GO:0008152|GO:0071704|GO:0044238|GO:0006629	metabolic process|organic substance metabolic process|primary metabolic process|lipid metabolic process	-	-	-	-	scaffold_48:89269-92467	11	18	5	2	6	2	0.706818	0.971039	0.285644	0.119595	0.34168	0.118487	0.6545	0.193254	1.75989	0.00361915	0.0455463	UP
Potri.019G015500	ATERF1,ERF1	ethylene response factor 1	GO:0008152|GO:0044237|GO:0003700|GO:0071704|GO:0009058|GO:0006807|GO:0044238|GO:0006139|GO:0006725|GO:0016070|GO:0010468|GO:0009059|GO:0006351|GO:0006355	metabolic process|cellular metabolic process|transcription factor activity, sequence-specific DNA binding|organic substance metabolic process|biosynthetic process|nitrogen compound metabolic process|primary metabolic process|nucleobase-containing compound metabolic process|cellular aromatic compound metabolic process|RNA metabolic process|regulation of gene expression|macromolecule biosynthetic p…	K14516	ethylene-responsive transcription factor 1[-]	ko04075|ko04016	Plant hormone signal transduction|MAPK signaling pathway - plant	Chr19:1717799-1718612	6	4	7	1	2	0	0.854374	0.478169	0.886239	0.132448	0.252364	0	0.739594	0.128271	2.52754	0.00367004	0.046052	UP
Potri.011G028100	CRK25	cysteine-rich RLK (RECEPTOR-like protein kinase) 25	GO:0003824|GO:0008152|GO:0044237|GO:0071704|GO:0016740|GO:0044238|GO:0016772|GO:0019538|GO:0016301|GO:0006796|GO:0016773|GO:0006464|GO:0016310|GO:0004672|GO:0006468	catalytic activity|metabolic process|cellular metabolic process|organic substance metabolic process|transferase activity|primary metabolic process|transferase activity, transferring phosphorus-containing groups|protein metabolic process|kinase activity|phosphate-containing compound metabolic process|phosphotransferase activity, alcohol group as acceptor|cellular protein modification process|phosp…	-	-	-	-	Chr11:2306713-2309552	0	0	0	7	4	0	0	0	0	0.363534	0.197809	0	0	0.187114	#NAME?	0.00370915	0.0463882	DOWN
Potri.019G000800	AMT2,AMT2;1,ATAMT2	ammonium transporter 2	GO:0005215|GO:0016020|GO:0022857|GO:0055085|GO:0006810|GO:0034220|GO:0006811|GO:0071705|GO:0006812|GO:0008324|GO:0015696|GO:0072488|GO:0008519	transporter activity|membrane|transmembrane transporter activity|transmembrane transport|transport|ion transmembrane transport|ion transport|nitrogen compound transport|cation transport|cation transmembrane transporter activity|ammonium transport|ammonium transmembrane transport|ammonium transmembrane transporter activity	-	-	-	-	Chr19:130404-137063	7	3	9	14	18	13	0.482698	0.17366	0.551752	0.898348	1.09997	0.826412	0.402703	0.941578	-1.22536	0.00375975	0.046788	DOWN
Potri.017G045800	-	-	-	-	-	-	-	-	Chr17:3807098-3807448	8	12	13	4	4	4	2.64208	3.32706	3.81678	1.22934	1.17051	1.21796	3.26197	1.20594	1.43559	0.00381179	0.0472988	UP
Potri.006G158800	ATOFP8,OFP8	ovate family protein 8	-	-	-	-	-	-	Chr06:14923578-14924521	5	7	1	0	0	1	0.614024	0.721676	0.109223	0	0	0.113151	0.481641	0.037717	3.67467	0.00386214	0.0476683	UP
Potri.018G088500	-	GDSL-like Lipase/Acylhydrolase superfamily protein	GO:0003824|GO:0016787|GO:0016788	catalytic activity|hydrolase activity|hydrolase activity, acting on ester bonds	-	-	-	-	Chr18:11580807-11582443	0	1	2	4	5	8	0	0.0855826	0.181264	0.379506	0.451733	0.751876	0.0889489	0.527705	-2.56868	0.00385643	0.0476683	DOWN
Potri.012G024800	-	P-loop containing nucleoside triphosphate hydrolases superfamily protein	GO:0000166|GO:0001882|GO:0032549|GO:0005524	nucleotide binding|nucleoside binding|ribonucleoside binding|ATP binding	-	-	-	-	Chr12:2136911-2140125	11	19	45	52	49	49	2.01756	2.92573	7.33778	8.87498	7.96429	8.28518	4.09369	8.37482	-1.03266	0.0038696	0.04769	DOWN
Potri.T085200	-	-	-	-	-	-	-	-	scaffold_95:130350-132456	41	14	45	231	232	7	1.14716	0.328874	1.11935	6.01416	5.75234	0.180562	0.865127	3.98235	-2.20264	0.00392267	0.0481787	DOWN
Potri.006G154500	BAS1,CYP72B1,CYP734A1	Cytochrome P450 superfamily protein	GO:0003824|GO:0008152|GO:0016491|GO:0016705|GO:0055114|GO:0043169|GO:0020037|GO:0046872|GO:0005506	catalytic activity|metabolic process|oxidoreductase activity|oxidoreductase activity, acting on paired donors, with incorporation or reduction of molecular oxygen|oxidation-reduction process|cation binding|heme binding|metal ion binding|iron ion binding	K15639	PHYB activation tagged suppressor 1 [EC:1.14.-.-][-]	ko00905	Brassinosteroid biosynthesis	Chr06:13870716-13873853	0	10	7	15	15	12	0	0.30584	0.226712	0.508465	0.484243	0.403012	0.177518	0.46524	-1.39001	0.0039755	0.0485543	DOWN
Potri.013G136700	-	photosynthetic electron transfer B	GO:0008152|GO:0016020|GO:0044237|GO:0022900|GO:0055114|GO:0022904	metabolic process|membrane|cellular metabolic process|electron transport chain|oxidation-reduction process|respiratory electron transport chain	-	-	-	-	Chr13:14668397-14668908	4	7	16	17	16	40	0.905634	1.33059	3.2205	3.58142	3.21022	8.3487	1.81891	5.04678	-1.47229	0.0040008	0.0486818	DOWN
Potri.005G028000	HCT	hydroxycinnamoyl-CoA shikimate/quinate hydroxycinnamoyl transferase	GO:0003824|GO:0016740|GO:0016746|GO:0016747	catalytic activity|transferase activity|transferase activity, transferring acyl groups|transferase activity, transferring acyl groups other than amino-acyl groups	K13065	shikimate O-hydroxycinnamoyltransferase[2.3.1.133]	ko01100|ko01100|ko01110|ko00940|ko00941|ko00945	Metabolic pathways|Metabolic pathways|Biosynthesis of secondary metabolites|Phenylpropanoid biosynthesis|Flavonoid biosynthesis|Stilbenoid, diarylheptanoid and gingerol biosynthesis	Chr05:2049629-2051724	9	19	15	6	5	7	0.46702	0.827691	0.691937	0.289671	0.229911	0.334856	0.662216	0.284812	1.21729	0.00407973	0.0493829	UP
Potri.019G076600	-	GDSL-like Lipase/Acylhydrolase superfamily protein	GO:0003824|GO:0016787|GO:0016788	catalytic activity|hydrolase activity|hydrolase activity, acting on ester bonds	-	-	-	-	Chr19:11065926-11068275	12	14	5	5	4	0	0.843574	0.826273	0.312493	0.327054	0.24915	0	0.66078	0.192068	1.78255	0.00410538	0.0496136	UP
Potri.019G095600	-	-	-	-	-	-	-	-	Chr19:12644933-12645592	26	36	12	10	10	13	4.56649	5.30834	1.87379	1.63428	1.55642	2.10485	3.91621	1.76518	1.14964	0.00411429	0.0496815	UP
Potri.008G104650	-	GDSL-like Lipase/Acylhydrolase superfamily protein	GO:0003824|GO:0016787|GO:0016788	catalytic activity|hydrolase activity|hydrolase activity, acting on ester bonds	-	-	-	-	Chr08:6637491-6643497	5	3	6	11	17	9	0.154447	0.0777837	0.164746	0.316163	0.465304	0.256248	0.132325	0.345905	-1.38628	0.00411811	0.0496878	DOWN
Potri.017G137851	TAO1	target of AVRB operation1	-	-	-	-	-	-	Chr17:14628428-14632620	0	0	0	16	0	0	0	0	0	0.411608	0	0	0	0.137203	#NAME?	0.00415301	0.0498891	DOWN
Potri.019G107266	-	Ankyrin repeat family protein	-	-	-	-	-	-	Chr19:13563114-13563780	15	0	0	0	0	0	4.02496	0	0	0	0	0	1.34165	0	Inf	0.00415301	0.0498891	UP

## Sheet: Table S5
Table S5 DEGs identiﬁed by comparing DET2-OE-BA with 84K-BA.
gene id	gene name	description	GO_id	GO_term	KO_ID	KO_Description	kegg_id	kegg_term	locus	DET2-BA-R1_count	DET2-BA-R2_count	DET2-BA-R3_count	84K-1-BA-R1_count	84K-1-BA-R2_count	84K-1-BA-R3_count	DET2-BA-R1_FPKM	DET2-BA-R2_FPKM	DET2-BA-R3_FPKM	84K-1-BA-R1_FPKM	84K-1-BA-R2_FPKM	84K-1-BA-R3_FPKM	group5	group2	log2FC	Pvalue	Qvalue	updown
Potri.016G110600	ATDET2,DET2,DWF6	3-oxo-5-alpha-steroid 4-dehydrogenase family protein	-	-	K09591	steroid 5-alpha-reductase[1.3.1.22]	ko01100|ko01100|ko01110|ko00905	Metabolic pathways|Metabolic pathways|Biosynthesis of secondary metabolites|Brassinosteroid biosynthesis	Chr16:11305579-11306422	23040	25649	24782	67	69	81	2993.98	3139.44	3068.05	9.44148	8.0877	8.43336	3067.15	8.65418	8.46929	0	0	UP
Potri.003G063300	-	Kinase-related protein of unknown function (DUF1296)	-	-	-	-	-	-	Chr03:9166931-9175302	2356	2408	2976	404	457	558	66.3061	63.8337	79.7941	12.33	11.6013	12.5824	69.978	12.1712	2.52343	2.24928e-87	3.35626e-83	UP
Potri.003G061300	-	Ran BP2/NZF zinc finger-like superfamily protein	GO:0043169|GO:0046872|GO:0008270	cation binding|metal ion binding|zinc ion binding	-	-	-	-	Chr03:8887304-8888385	108	96	103	439	516	599	16.6128	13.9093	15.0944	73.2296	71.5946	73.824	15.2055	72.8827	-2.26098	8.46322e-69	8.41893e-65	DOWN
Potri.004G020000	-	Polyketide cyclase/dehydrase and lipid transport superfamily protein	GO:0009607|GO:0006950|GO:0006952	response to biotic stimulus|response to stress|defense response	-	-	-	-	Chr04:1330631-1331339	40	36	29	237	306	301	7.87618	6.67695	5.44004	50.6063	54.3483	47.4867	6.66439	50.8138	-2.93067	1.17606e-64	8.39766e-61	DOWN
Potri.012G055700	BEE3	BR enhanced expression 3	GO:0005515|GO:0046983	protein binding|protein dimerization activity	-	-	-	-	Chr12:5729189-5730752	465	516	449	97	91	120	34.3197	35.872	31.5715	7.76361	6.05816	7.09614	33.9211	6.97264	2.28241	1.40697e-64	8.39766e-61	UP
Potri.016G112400	-	HXXXD-type acyl-transferase family protein	GO:0003824|GO:0016740|GO:0016746|GO:0016747	catalytic activity|transferase activity|transferase activity, transferring acyl groups|transferase activity, transferring acyl groups other than amino-acyl groups	-	-	-	-	Chr16:11558564-11562519	209	196	215	23	35	45	5.79426	5.11828	5.67872	0.691472	0.875246	0.999566	5.53042	0.855428	2.69267	2.67692e-48	1.33145e-44	UP
Potri.005G059500	BGLU32	beta glucosidase 32	GO:0003824|GO:0008152|GO:0071704|GO:0016787|GO:0044238|GO:0005975|GO:0016798|GO:0004553	catalytic activity|metabolic process|organic substance metabolic process|hydrolase activity|primary metabolic process|carbohydrate metabolic process|hydrolase activity, acting on glycosyl bonds|hydrolase activity, hydrolyzing O-glycosyl compounds	K01188	beta-glucosidase[3.2.1.21]	ko01100|ko01100|ko01110|ko00500|ko00940|ko00460	Metabolic pathways|Metabolic pathways|Biosynthesis of secondary metabolites|Starch and sucrose metabolism|Phenylpropanoid biosynthesis|Cyanoamino acid metabolism	Chr05:4182619-4187153	6	10	8	98	114	157	0.380353	0.597136	0.483164	6.73735	6.51894	7.97471	0.486884	7.077	-3.86149	9.64438e-48	4.11167e-44	DOWN
Potri.017G051100	MLP31	MLP-like protein 31	GO:0009607|GO:0006950|GO:0006952	response to biotic stimulus|response to stress|defense response	-	-	-	-	Chr17:4288108-4288975	73	78	56	286	312	366	14.993	15.0895	10.9576	63.6996	57.8007	60.2282	13.68	60.5762	-2.14668	2.45378e-47	9.15354e-44	DOWN
Potri.015G110400	FSD2	Fe superoxide dismutase 2	GO:0016209|GO:0003824|GO:0008152|GO:0044237|GO:0016491|GO:0004784|GO:0055114|GO:0043169|GO:0006801|GO:0046872	antioxidant activity|catalytic activity|metabolic process|cellular metabolic process|oxidoreductase activity|superoxide dismutase activity|oxidation-reduction process|cation binding|superoxide metabolic process|metal ion binding	K04564	superoxide dismutase, Fe-Mn family[1.15.1.1]	ko04146|ko04212|ko04068|ko04211|ko04213|ko04013	Peroxisome|Longevity regulating pathway - worm|FoxO signaling pathway|Longevity regulating pathway|Longevity regulating pathway - multiple species|MAPK signaling pathway - fly	Chr15:12681699-12683939	633	599	640	188	226	239	56.351	50.2273	54.2797	18.1492	18.1476	17.047	53.6193	17.7813	1.5924	9.73959e-43	3.22954e-39	UP
Potri.008G116500	-	NAD(P)-binding Rossmann-fold superfamily protein	GO:0003824|GO:0048037|GO:0050662	catalytic activity|cofactor binding|coenzyme binding	K13081	leucoanthocyanidin reductase[1.17.1.3]	ko01110|ko00941	Biosynthesis of secondary metabolites|Flavonoid biosynthesis	Chr08:7464844-7466747	75	83	78	7	5	6	6.82065	7.10972	6.75799	0.690311	0.410148	0.437212	6.89612	0.512557	3.75	3.53259e-39	1.05423e-35	UP
Potri.006G252200	PNP-A	plant natriuretic peptide A	-	-	-	-	-	-	Chr06:25774745-25775511	32	43	40	153	187	232	5.93841	7.51632	7.0719	30.7904	31.3022	34.4955	6.84221	32.196	-2.23435	7.22571e-36	1.96034e-32	DOWN
Potri.008G061700	-	-	-	-	-	-	-	-	Chr08:3713079-3714760	147	149	112	21	23	30	14.2801	13.6338	10.3656	2.21229	2.01536	2.33498	12.7598	2.18754	2.54422	1.15755e-31	2.87873e-28	UP
Potri.004G132200	KAT2	potassium channel in Arabidopsis thaliana 2	-	-	-	-	-	-	Chr04:15085707-15090169	79	92	106	281	345	320	2.81949	3.09277	3.60424	10.8756	11.1065	9.15056	3.17217	10.3776	-1.70993	5.6207e-30	1.2903e-26	DOWN
Potri.007G146401	ARGOS	auxin-regulated gene involved in organ size	-	-	-	-	-	-	Chr07:15527611-15529537	308	320	303	114	130	153	7.2303	7.07573	6.77654	2.90212	2.7527	2.87772	7.02752	2.84418	1.305	2.46992e-25	5.26498e-22	UP
Potri.006G047400	ACA4,ATACA4	alpha carbonic anhydrase 4	-	-	K01674	carbonic anhydrase[4.2.1.1]	ko00910	Nitrogen metabolism	Chr06:3368138-3371034	262	261	292	85	107	129	29.4114	27.5976	31.2289	10.3475	10.8345	11.6026	29.4126	10.9282	1.42838	4.68473e-25	9.32043e-22	UP
Potri.010G236500	ATATX1,ATX1	homolog of anti-oxidant 1	GO:0043169|GO:0006810|GO:0006811|GO:0046872|GO:0006812|GO:0030001	cation binding|transport|ion transport|metal ion binding|cation transport|metal ion transport	-	-	-	-	Chr10:21618804-21620267	2469	2496	2020	898	970	905	705.178	671.486	549.653	278.135	249.897	207.099	642.106	245.044	1.38977	6.1863e-25	1.15386e-21	UP
Potri.010G230100	-	GDSL-like Lipase/Acylhydrolase superfamily protein	GO:0003824|GO:0016787|GO:0016788	catalytic activity|hydrolase activity|hydrolase activity, acting on ester bonds	-	-	-	-	Chr10:21223971-21229255	58	41	70	0	3	6	1.31729	0.877114	1.51463	0	0.0614585	0.10919	1.23634	0.0568828	4.44194	3.00696e-24	4.98537e-21	UP
Potri.019G014900	AtPLAIVB,PLA IVB,PLP5	PATATIN-like protein 5	GO:0008152|GO:0071704|GO:0044238|GO:0006629	metabolic process|organic substance metabolic process|primary metabolic process|lipid metabolic process	-	-	-	-	Chr19:1637561-1640941	52	58	46	7	5	2	3.73971	3.92899	3.15181	0.545911	0.324353	0.11523	3.60684	0.328498	3.45678	2.8892e-24	4.98537e-21	UP
Potri.001G145200	NRT1.5	nitrate transporter 1.5	GO:0005215|GO:0016020|GO:0016021|GO:0055085|GO:0006810	transporter activity|membrane|integral component of membrane|transmembrane transport|transport	-	-	-	-	Chr01:11820141-11825467	227	270	239	48	44	101	13.1657	14.7501	13.2061	3.01896	2.30186	4.69345	13.7073	3.33809	2.03785	5.31008e-24	8.34045e-21	UP
Potri.008G165600	-	nodulin MtN21 /EamA-like transporter family protein	GO:0005215|GO:0016020|GO:0022857|GO:0016021	transporter activity|membrane|transmembrane transporter activity|integral component of membrane	-	-	-	-	Chr08:11289522-11294424	305	308	305	579	667	761	6.9864	6.64538	6.65601	14.3825	13.7813	13.9666	6.7626	14.0435	-1.05425	2.27941e-22	3.23926e-19	DOWN
Potri.010G069400	-	P-loop containing nucleoside triphosphate hydrolases superfamily protein	GO:0003824|GO:0005622|GO:0005515|GO:0016787|GO:0007017|GO:0016817|GO:0000166|GO:0001882|GO:0005875|GO:0032549|GO:0016818|GO:0005871|GO:0015631|GO:0007018|GO:0008017|GO:0005856|GO:0016462|GO:0005524|GO:0003774|GO:0003777	catalytic activity|intracellular|protein binding|hydrolase activity|microtubule-based process|hydrolase activity, acting on acid anhydrides|nucleotide binding|nucleoside binding|microtubule associated complex|ribonucleoside binding|hydrolase activity, acting on acid anhydrides, in phosphorus-containing anhydrides|kinesin complex|tubulin binding|microtubule-based movement|microtubule binding|cytos…	-	-	-	-	Chr10:9649072-9652914	416	434	483	171	217	230	14.2622	14.0152	15.7761	6.35761	6.71067	6.31791	14.6845	6.46206	1.18423	2.61591e-22	3.54848e-19	UP
Potri.013G114700	ATPS1,PS1	forkhead-associated (FHA) domain-containing protein	GO:0005515	protein binding	-	-	-	-	Chr13:12781606-12786300	448	431	534	171	216	196	14.0064	12.6923	15.9056	5.7976	6.09136	4.90973	14.2014	5.59957	1.34265	3.13284e-22	4.06493e-19	UP
Potri.001G209300	ARPN	plantacyanin	GO:0009055	electron carrier activity	-	-	-	-	Chr01:21013858-21014419	385	407	377	694	883	909	92.1942	91.8021	86.0089	180.221	190.728	174.405	90.0018	181.785	-1.0142	2.56465e-21	3.18904e-18	DOWN
Potri.015G117350	AGO2	Argonaute family protein	GO:0003676	nucleic acid binding	-	-	-	-	Chr15:13254772-13255917	352	371	362	135	192	199	33.6874	33.4437	33.0059	14.0107	16.5744	15.2591	33.379	15.2814	1.12717	2.08619e-20	2.39455e-17	UP
Potri.009G156000	-	P-loop containing nucleoside triphosphate hydrolases superfamily protein	GO:0003824|GO:0005622|GO:0005515|GO:0016787|GO:0007017|GO:0016817|GO:0000166|GO:0001882|GO:0005875|GO:0032549|GO:0016818|GO:0005871|GO:0015631|GO:0007018|GO:0008017|GO:0005856|GO:0016462|GO:0005524|GO:0003774|GO:0003777	catalytic activity|intracellular|protein binding|hydrolase activity|microtubule-based process|hydrolase activity, acting on acid anhydrides|nucleotide binding|nucleoside binding|microtubule associated complex|ribonucleoside binding|hydrolase activity, acting on acid anhydrides, in phosphorus-containing anhydrides|kinesin complex|tubulin binding|microtubule-based movement|microtubule binding|cytos…	-	-	-	-	Chr09:12140176-12149024	339	323	341	128	135	193	8.56878	7.69017	8.21169	3.50858	3.07798	3.90867	8.15688	3.49841	1.22132	5.34503e-20	5.90784e-17	UP
Potri.011G049900	-	Aluminium induced protein with YGL and LRDR motifs	-	-	-	-	-	-	Chr11:4276919-4278017	112	114	121	225	271	313	13.6485	13.0854	14.0479	29.7338	29.7884	30.5606	13.5939	30.0276	-1.14333	1.27481e-18	1.18888e-15	DOWN
Potri.013G140300	-	ribosomal protein L22	GO:0005198|GO:0008152|GO:0044237|GO:0005622|GO:0071704|GO:0009058|GO:0003735|GO:0006807|GO:0044238|GO:0005737|GO:0019538|GO:0005840|GO:0015934|GO:0009059|GO:0006412|GO:0043043	structural molecule activity|metabolic process|cellular metabolic process|intracellular|organic substance metabolic process|biosynthetic process|structural constituent of ribosome|nitrogen compound metabolic process|primary metabolic process|cytoplasm|protein metabolic process|ribosome|large ribosomal subunit|macromolecule biosynthetic process|translation|peptide biosynthetic process	-	-	-	-	Chr13:14811318-14812060	42	17	46	0	0	0	16.3345	6.22783	17.0444	0	0	0	13.2022	0	Inf	2.80121e-18	2.53323e-15	UP
Potri.002G110600	-	Di-glucose binding protein with Kinesin motor domain	GO:0003824|GO:0005622|GO:0005515|GO:0016787|GO:0007017|GO:0016817|GO:0000166|GO:0001882|GO:0005875|GO:0032549|GO:0016818|GO:0005871|GO:0015631|GO:0007018|GO:0008017|GO:0005856|GO:0016462|GO:0005524|GO:0003774|GO:0003777	catalytic activity|intracellular|protein binding|hydrolase activity|microtubule-based process|hydrolase activity, acting on acid anhydrides|nucleotide binding|nucleoside binding|microtubule associated complex|ribonucleoside binding|hydrolase activity, acting on acid anhydrides, in phosphorus-containing anhydrides|kinesin complex|tubulin binding|microtubule-based movement|microtubule binding|cytos…	-	-	-	-	Chr02:8165304-8171773	338	388	378	159	185	222	11.0164	11.9116	11.7375	5.61983	5.43886	5.79732	11.5552	5.61867	1.04024	3.21376e-18	2.82083e-15	UP
Potri.002G106000	-	P-loop containing nucleoside triphosphate hydrolases superfamily protein	GO:0003824|GO:0005622|GO:0005515|GO:0016787|GO:0007017|GO:0016817|GO:0000166|GO:0001882|GO:0005875|GO:0032549|GO:0016818|GO:0005871|GO:0015631|GO:0007018|GO:0008017|GO:0005856|GO:0016462|GO:0005524|GO:0003774|GO:0003777	catalytic activity|intracellular|protein binding|hydrolase activity|microtubule-based process|hydrolase activity, acting on acid anhydrides|nucleotide binding|nucleoside binding|microtubule associated complex|ribonucleoside binding|hydrolase activity, acting on acid anhydrides, in phosphorus-containing anhydrides|kinesin complex|tubulin binding|microtubule-based movement|microtubule binding|cytos…	-	-	-	-	Chr02:7736595-7745050	697	722	869	316	388	457	17.0786	16.6637	20.2861	8.39668	8.57553	8.97195	18.0094	8.64805	1.05831	3.59747e-18	3.06741e-15	UP
Potri.018G098900	-	-	-	-	-	-	-	-	Chr18:12707750-12708313	65	56	48	7	10	15	12.6398	10.2574	8.89271	1.47609	1.75404	2.33705	10.5966	1.85573	2.51355	1.97884e-17	1.59607e-14	UP
Potri.002G074000	ARPN	plantacyanin	GO:0009055	electron carrier activity	-	-	-	-	Chr02:5115230-5116156	72	63	60	150	190	193	12.0192	9.90599	9.54231	27.1542	28.6094	25.8139	10.4892	27.1925	-1.37431	2.52858e-17	1.9858e-14	DOWN
Potri.011G094400	-	O-Glycosyl hydrolases family 17 protein	GO:0003824|GO:0008152|GO:0071704|GO:0016787|GO:0044238|GO:0005975|GO:0016798|GO:0004553	catalytic activity|metabolic process|organic substance metabolic process|hydrolase activity|primary metabolic process|carbohydrate metabolic process|hydrolase activity, acting on glycosyl bonds|hydrolase activity, hydrolyzing O-glycosyl compounds	-	-	-	-	Chr11:11477082-11479372	459	418	414	197	193	182	31.365	26.9045	26.9521	14.5983	11.8961	9.96453	28.4072	12.153	1.22495	2.80772e-17	2.14848e-14	UP
Potri.003G030450	-	-	-	-	-	-	-	-	Chr03:3826628-3826882	217	240	335	47	62	118	93.3315	97.2288	137.269	21.9214	24.053	40.6633	109.276	28.8792	1.91988	5.78884e-17	4.31891e-14	UP
Potri.001G264000	ATTOPII,TOPII	topoisomerase II	GO:0003824|GO:0008152|GO:0044237|GO:0016853|GO:0071704|GO:0006807|GO:0016787|GO:0044238|GO:0016817|GO:0003916|GO:0003676|GO:0000166|GO:0001882|GO:0006139|GO:0006725|GO:0003677|GO:0032549|GO:0051276|GO:0016818|GO:0006259|GO:0006265|GO:0003918|GO:0016462|GO:0005524|GO:0016887|GO:0042623	catalytic activity|metabolic process|cellular metabolic process|isomerase activity|organic substance metabolic process|nitrogen compound metabolic process|hydrolase activity|primary metabolic process|hydrolase activity, acting on acid anhydrides|DNA topoisomerase activity|nucleic acid binding|nucleotide binding|nucleoside binding|nucleobase-containing compound metabolic process|cellular aromatic …	K03164	DNA topoisomerase II[5.99.1.3]	ko01524	Platinum drug resistance	Chr01:27263643-27270212	527	554	684	256	289	342	10.8481	10.7416	13.414	5.71461	5.36603	5.64057	11.6679	5.57374	1.06583	8.65031e-17	6.29637e-14	UP
Potri.003G002601	ATPME3,PME3	pectin methylesterase 3	GO:0003824|GO:0016787|GO:0016788|GO:0005618|GO:0052689|GO:0042545|GO:0030599	catalytic activity|hydrolase activity|hydrolase activity, acting on ester bonds|cell wall|carboxylic ester hydrolase activity|cell wall modification|pectinesterase activity	K01051	pectinesterase[3.1.1.11]	ko01100|ko01100|ko00040	Metabolic pathways|Metabolic pathways|Pentose and glucuronate interconversions	Chr03:289010-290180	18	17	23	0	0	0	1.81448	1.6142	2.20882	0	0	0	1.87917	0	Inf	3.27988e-16	2.27631e-13	UP
Potri.004G145800	POK2	phragmoplast orienting kinesin 2	GO:0003824|GO:0005622|GO:0005515|GO:0016787|GO:0007017|GO:0016817|GO:0000166|GO:0001882|GO:0005875|GO:0032549|GO:0016818|GO:0005871|GO:0015631|GO:0007018|GO:0008017|GO:0005856|GO:0016462|GO:0005524|GO:0003774|GO:0003777	catalytic activity|intracellular|protein binding|hydrolase activity|microtubule-based process|hydrolase activity, acting on acid anhydrides|nucleotide binding|nucleoside binding|microtubule associated complex|ribonucleoside binding|hydrolase activity, acting on acid anhydrides, in phosphorus-containing anhydrides|kinesin complex|tubulin binding|microtubule-based movement|microtubule binding|cytos…	-	-	-	-	Chr04:16901232-16915634	1676	1763	2507	694	871	1102	19.651	19.4706	28.0043	8.82415	9.21172	10.3525	22.3753	9.46278	1.24157	5.69547e-16	3.695e-13	UP
Potri.013G141600	-	-	-	-	-	-	-	-	Chr13:14850345-14850901	218	193	363	37	52	96	42.9249	35.7952	68.0957	7.90059	9.23563	15.1453	48.9386	10.7605	2.18523	6.16986e-16	3.9176e-13	UP
Potri.013G075200	-	Ycf1 protein	-	-	-	-	-	-	Chr13:6413755-6414887	78	76	122	14	15	30	18.0478	16.5638	26.8936	3.51272	3.13063	5.56158	20.5017	4.06831	2.33324	6.60481e-16	4.1064e-13	UP
Potri.001G189900	AHP4	HPT phosphotransmitter 4	GO:0004871|GO:0051716|GO:0007165|GO:0035556|GO:0000160	signal transducer activity|cellular response to stimulus|signal transduction|intracellular signal transduction|phosphorelay signal transduction system	K14490	histidine-containing phosphotransfer peotein[-]	ko04075	Plant hormone signal transduction	Chr01:16997177-16998725	0	0	0	16	18	21	0	0	0	3.30373	3.09149	3.20377	0	3.19967	#NAME?	2.1349e-15	1.27424e-12	DOWN
Potri.016G011601	-	Leucine-rich repeat transmembrane protein kinase	GO:0003824|GO:0008152|GO:0044237|GO:0005515|GO:0071704|GO:0016740|GO:0044238|GO:0016772|GO:0019538|GO:0016301|GO:0006796|GO:0016773|GO:0006464|GO:0016310|GO:0004672|GO:0006468	catalytic activity|metabolic process|cellular metabolic process|protein binding|organic substance metabolic process|transferase activity|primary metabolic process|transferase activity, transferring phosphorus-containing groups|protein metabolic process|kinase activity|phosphate-containing compound metabolic process|phosphotransferase activity, alcohol group as acceptor|cellular protein modificati…	-	-	-	-	Chr16:615381-637895	188	172	196	61	88	98	2.58838	2.23055	2.5709	0.910761	1.09285	1.08105	2.46327	1.02822	1.26043	2.83536e-15	1.65913e-12	UP
Potri.009G058900	ATTOPII,TOPII	topoisomerase II	GO:0003824|GO:0008152|GO:0044237|GO:0016853|GO:0071704|GO:0006807|GO:0016787|GO:0044238|GO:0016817|GO:0003916|GO:0003676|GO:0000166|GO:0001882|GO:0006139|GO:0006725|GO:0003677|GO:0032549|GO:0051276|GO:0016818|GO:0006259|GO:0006265|GO:0003918|GO:0016462|GO:0005524|GO:0016887|GO:0042623	catalytic activity|metabolic process|cellular metabolic process|isomerase activity|organic substance metabolic process|nitrogen compound metabolic process|hydrolase activity|primary metabolic process|hydrolase activity, acting on acid anhydrides|DNA topoisomerase activity|nucleic acid binding|nucleotide binding|nucleoside binding|nucleobase-containing compound metabolic process|cellular aromatic …	K03164	DNA topoisomerase II[5.99.1.3]	ko01524	Platinum drug resistance	Chr09:6144199-6151082	535	612	715	257	353	343	10.4536	11.2637	13.31	5.44564	6.22156	5.36981	11.6758	5.679	1.03981	4.18534e-15	2.40198e-12	UP
Potri.001G360200	-	Kinesin motor family protein	GO:0003824|GO:0005622|GO:0005515|GO:0016787|GO:0007017|GO:0016817|GO:0000166|GO:0001882|GO:0005875|GO:0032549|GO:0016818|GO:0005871|GO:0015631|GO:0007018|GO:0008017|GO:0005856|GO:0016462|GO:0005524|GO:0003774|GO:0003777	catalytic activity|intracellular|protein binding|hydrolase activity|microtubule-based process|hydrolase activity, acting on acid anhydrides|nucleotide binding|nucleoside binding|microtubule associated complex|ribonucleoside binding|hydrolase activity, acting on acid anhydrides, in phosphorus-containing anhydrides|kinesin complex|tubulin binding|microtubule-based movement|microtubule binding|cytos…	-	-	-	-	Chr01:37089207-37095035	1048	1097	1371	498	567	755	29.9712	29.5505	37.3543	15.4445	14.6264	17.2998	32.292	15.7903	1.03214	4.56209e-15	2.52123e-12	UP
Potri.T033833	-	ribosomal protein L22	-	-	-	-	-	-	scaffold_35:211913-212076	144	158	258	39	35	71	96.3004	99.5261	164.378	28.283	21.1126	38.0428	120.068	29.1462	2.04248	4.97775e-15	2.70092e-12	UP
Potri.006G082900	-	ATP binding microtubule motor family protein	GO:0003824|GO:0005622|GO:0005515|GO:0016787|GO:0007017|GO:0016817|GO:0000166|GO:0001882|GO:0005875|GO:0032549|GO:0016818|GO:0005871|GO:0015631|GO:0007018|GO:0008017|GO:0005856|GO:0016462|GO:0005524|GO:0003774|GO:0003777	catalytic activity|intracellular|protein binding|hydrolase activity|microtubule-based process|hydrolase activity, acting on acid anhydrides|nucleotide binding|nucleoside binding|microtubule associated complex|ribonucleoside binding|hydrolase activity, acting on acid anhydrides, in phosphorus-containing anhydrides|kinesin complex|tubulin binding|microtubule-based movement|microtubule binding|cytos…	-	-	-	-	Chr06:6247606-6254154	441	422	552	198	243	277	13.823	12.4593	16.484	6.73025	6.87041	6.95659	14.2554	6.85242	1.05683	8.14959e-15	4.343e-12	UP
Potri.003G067400	-	ribosomal protein L33	GO:0005198|GO:0008152|GO:0044237|GO:0005622|GO:0071704|GO:0009058|GO:0003735|GO:0006807|GO:0044238|GO:0005737|GO:0019538|GO:0005840|GO:0009059|GO:0006412|GO:0043043	structural molecule activity|metabolic process|cellular metabolic process|intracellular|organic substance metabolic process|biosynthetic process|structural constituent of ribosome|nitrogen compound metabolic process|primary metabolic process|cytoplasm|protein metabolic process|ribosome|macromolecule biosynthetic process|translation|peptide biosynthetic process	K02913	large subunit ribosomal protein L33[-]	ko03010	Ribosome	Chr03:9568030-9569026	437	450	793	136	134	252	48.0724	46.6274	83.1087	16.2239	13.2962	22.2109	59.2695	17.2437	1.78122	2.57478e-14	1.25966e-11	UP
Potri.001G440700	-	FAD-binding Berberine family protein	GO:0003824|GO:0008152|GO:0016491|GO:0048037|GO:0055114|GO:0000166|GO:0050662|GO:0050660	catalytic activity|metabolic process|oxidoreductase activity|cofactor binding|oxidation-reduction process|nucleotide binding|coenzyme binding|flavin adenine dinucleotide binding	-	-	-	-	Chr01:47236913-47238496	17	16	15	0	0	0	1.17709	1.04347	0.989473	0	0	0	1.07001	0	Inf	5.00203e-14	2.29655e-11	UP
Potri.019G067500	-	Major facilitator superfamily protein	GO:0005215|GO:0016020|GO:0006810	transporter activity|membrane|transport	-	-	-	-	Chr19:10050392-10054459	142	159	153	41	63	87	7.46947	7.87797	7.66751	2.33877	2.98918	3.66668	7.67165	2.99821	1.35543	5.48493e-14	2.4801e-11	UP
Potri.011G073900	-	Ycf1 protein	-	-	-	-	-	-	Chr11:7193480-7194553	232	219	452	46	49	112	23.6915	21.0651	43.9746	5.0941	4.51346	9.16374	29.5771	6.2571	2.24091	9.05485e-14	3.97388e-11	UP
Potri.004G031600	ATK1,KATA,KATAP	kinesin 1	GO:0003824|GO:0005622|GO:0005515|GO:0016787|GO:0007017|GO:0016817|GO:0000166|GO:0001882|GO:0005875|GO:0032549|GO:0016818|GO:0005871|GO:0015631|GO:0007018|GO:0008017|GO:0005856|GO:0016462|GO:0005524|GO:0003774|GO:0003777	catalytic activity|intracellular|protein binding|hydrolase activity|microtubule-based process|hydrolase activity, acting on acid anhydrides|nucleotide binding|nucleoside binding|microtubule associated complex|ribonucleoside binding|hydrolase activity, acting on acid anhydrides, in phosphorus-containing anhydrides|kinesin complex|tubulin binding|microtubule-based movement|microtubule binding|cytos…	-	-	-	-	Chr04:2290207-2295806	352	392	475	181	205	243	11.6598	12.2307	14.99	6.50175	6.12513	6.44922	12.9602	6.3587	1.02728	9.4602e-14	4.0916e-11	UP
Potri.T058700	-	CemA-like proton extrusion protein-related	GO:0016020|GO:0016021	membrane|integral component of membrane	-	-	-	-	scaffold_56:82329-83015	431	383	747	80	107	223	68.8064	57.5925	113.614	13.8499	15.408	28.5239	80.0043	19.2606	2.05443	1.77108e-13	7.34088e-11	UP
Potri.001G162600	ATPME3,PME3	pectin methylesterase 3	GO:0003824|GO:0030234|GO:0016787|GO:0016788|GO:0005618|GO:0004857|GO:0052689|GO:0042545|GO:0030599	catalytic activity|enzyme regulator activity|hydrolase activity|hydrolase activity, acting on ester bonds|cell wall|enzyme inhibitor activity|carboxylic ester hydrolase activity|cell wall modification|pectinesterase activity	K01051	pectinesterase[3.1.1.11]	ko01100|ko01100|ko00040	Metabolic pathways|Metabolic pathways|Pentose and glucuronate interconversions	Chr01:13596196-13598191	128	145	130	48	60	75	7.5152	8.01889	7.27165	3.05613	3.17755	3.52814	7.60191	3.25394	1.22417	2.41322e-13	9.47602e-11	UP
Potri.019G050200	-	Phosphorylase superfamily protein	GO:0003824|GO:0008152|GO:0044237|GO:0071704|GO:0006807|GO:0044238|GO:0006139|GO:0006725|GO:0009116	catalytic activity|metabolic process|cellular metabolic process|organic substance metabolic process|nitrogen compound metabolic process|primary metabolic process|nucleobase-containing compound metabolic process|cellular aromatic compound metabolic process|nucleoside metabolic process	-	-	-	-	Chr19:7540268-7541930	40	29	33	82	96	118	3.95584	2.7014	3.10925	8.79411	8.56363	9.34999	3.2555	8.90257	-1.45134	2.40614e-13	9.47602e-11	DOWN
Potri.003G108400	ATCAP-E1,ATSMC4,SMC2,TTN3	structural maintenance of chromosomes 2	GO:0005622|GO:0005515|GO:0007049|GO:0000166|GO:0001882|GO:0007059|GO:0000278|GO:0007067|GO:0000796|GO:0032549|GO:0051276|GO:0005694|GO:0005524|GO:0007076	intracellular|protein binding|cell cycle|nucleotide binding|nucleoside binding|chromosome segregation|mitotic cell cycle|mitotic nuclear division|condensin complex|ribonucleoside binding|chromosome organization|chromosome|ATP binding|mitotic chromosome condensation	K06674	structural maintenance of chromosome 2[-]	ko04111	Cell cycle - yeast	Chr03:13242828-13250209	318	330	405	140	209	188	9.87729	9.65473	11.9846	4.71565	5.85557	4.67866	10.5056	5.08329	1.04732	5.18519e-13	1.89401e-10	UP
Potri.013G080300	-	Phosphorylase superfamily protein	GO:0003824|GO:0008152|GO:0044237|GO:0071704|GO:0006807|GO:0044238|GO:0006139|GO:0006725|GO:0009116	catalytic activity|metabolic process|cellular metabolic process|organic substance metabolic process|nitrogen compound metabolic process|primary metabolic process|nucleobase-containing compound metabolic process|cellular aromatic compound metabolic process|nucleoside metabolic process	-	-	-	-	Chr13:7005736-7007309	5	3	2	35	23	37	0.530332	0.299769	0.202097	4.02583	2.20052	3.14447	0.344066	3.12361	-3.18246	6.97952e-13	2.45047e-10	DOWN
Potri.012G055600	AtMYB62,BW62B,BW62C,MYB62	myb domain protein 62	-	-	-	-	-	-	Chr12:5674624-5676436	62	94	69	21	17	29	5.61511	8.0188	5.95352	2.06249	1.38875	2.10436	6.52915	1.85187	1.81791	7.26189e-13	2.51996e-10	UP
Potri.016G101900	-	-	-	-	-	-	-	-	Chr16:10022916-10023397	63	63	51	140	169	147	14.3352	13.5026	11.0558	34.5456	34.6865	26.7998	12.9645	32.0106	-1.30399	7.81321e-13	2.68011e-10	DOWN
Potri.014G064801	-	disease resistance protein (TIR-NBS-LRR class), putative	GO:0005515|GO:0051716|GO:0000166|GO:0001882|GO:0007165|GO:0032549|GO:0043531	protein binding|cellular response to stimulus|nucleotide binding|nucleoside binding|signal transduction|ribonucleoside binding|ADP binding	-	-	-	-	Chr14:5221070-5226034	317	338	435	153	190	224	17.9954	18.0732	23.5261	9.4188	9.72898	10.1883	19.8649	9.77869	1.02251	1.1916e-12	4.04102e-10	UP
Potri.016G112000	ATLMCO4,IRX12,LAC4,LMCO4	Laccase/Diphenol oxidase family protein	GO:0003824|GO:0008152|GO:0016491|GO:0055114|GO:0043169|GO:0046872|GO:0005507	catalytic activity|metabolic process|oxidoreductase activity|oxidation-reduction process|cation binding|metal ion binding|copper ion binding	-	-	-	-	Chr16:11477309-11479978	77	86	82	138	207	228	4.83677	5.08837	4.90726	9.40038	11.7286	11.475	4.94413	10.868	-1.1363	1.22636e-12	4.11215e-10	DOWN
Potri.008G180900	-	TPX2 (targeting protein for Xklp2) protein family	-	-	-	-	-	-	Chr08:12331736-12336052	332	320	405	159	159	231	15.9214	14.4547	18.5036	8.2688	6.87784	8.87578	16.2932	8.00747	1.02485	1.79258e-12	5.87867e-10	UP
Potri.013G137900	-	ATPase, F0 complex, subunit B/B\', bacterial/chloroplast	GO:0005215|GO:0008152|GO:0016020|GO:0044237|GO:0005622|GO:0022857|GO:0071704|GO:0009058|GO:0006807|GO:0044238|GO:0045263|GO:0055085|GO:0006139|GO:0006725|GO:0033177|GO:0006810|GO:0009116|GO:0034220|GO:1901137|GO:0006796|GO:0006811|GO:0009165|GO:0006812|GO:0015992|GO:0008324|GO:0006164|GO:0046034|GO:0015078|GO:0015986|GO:0006754	transporter activity|metabolic process|membrane|cellular metabolic process|intracellular|transmembrane transporter activity|organic substance metabolic process|biosynthetic process|nitrogen compound metabolic process|primary metabolic process|proton-transporting ATP synthase complex, coupling factor F(o)|transmembrane transport|nucleobase-containing compound metabolic process|cellular aromatic co…	K02109	F-type H+-transporting ATPase subunit b[-]	ko01100|ko01100|ko00190|ko00195	Metabolic pathways|Metabolic pathways|Oxidative phosphorylation|Photosynthesis	Chr13:14719426-14719914	306	376	534	90	118	221	68.6312	79.4335	114.104	21.89	23.8721	39.7141	87.3895	28.4921	1.6169	2.18269e-12	7.08021e-10	UP
Potri.002G066400	-	-	-	-	-	-	-	-	Chr02:4505977-4509883	74	80	148	15	19	35	2.50028	2.54605	4.7641	0.549617	0.57906	0.947491	3.27015	0.692056	2.24039	2.68283e-12	8.42774e-10	UP
Potri.001G162500	ATPME3,PME3	pectin methylesterase 3	GO:0003824|GO:0030234|GO:0016787|GO:0016788|GO:0005618|GO:0004857|GO:0052689|GO:0042545|GO:0030599	catalytic activity|enzyme regulator activity|hydrolase activity|hydrolase activity, acting on ester bonds|cell wall|enzyme inhibitor activity|carboxylic ester hydrolase activity|cell wall modification|pectinesterase activity	K01051	pectinesterase[3.1.1.11]	ko01100|ko01100|ko00040	Metabolic pathways|Metabolic pathways|Pentose and glucuronate interconversions	Chr01:13586777-13588762	166	204	180	48	61	114	9.79878	11.3425	10.1227	3.07258	3.2479	5.39165	10.4213	3.90404	1.4165	2.87935e-12	8.95087e-10	UP
Potri.015G095900	ATPAP27,PAP27	purple acid phosphatase 27	GO:0003824|GO:0016787	catalytic activity|hydrolase activity	-	-	-	-	Chr15:11645473-11650795	38	41	29	4	11	6	1.81674	1.84637	1.32088	0.207368	0.47437	0.229851	1.66133	0.303863	2.45085	3.37656e-12	1.00767e-09	UP
Potri.005G112100	-	Tetratricopeptide repeat (TPR)-like superfamily protein	-	-	-	-	-	-	Chr05:8599046-8601060	110	98	115	35	52	52	4.76095	3.99522	4.74196	1.64274	2.03009	1.80327	4.49937	1.82537	1.30154	4.49015e-12	1.32445e-09	UP
Potri.006G109100	ATWRKY70,WRKY70	WRKY DNA-binding protein 70	GO:0008152|GO:0044237|GO:0003700|GO:0071704|GO:0009058|GO:0006807|GO:0044238|GO:0003676|GO:0006139|GO:0006725|GO:0016070|GO:0003677|GO:0010468|GO:0009059|GO:0006351|GO:0043565|GO:0006355	metabolic process|cellular metabolic process|transcription factor activity, sequence-specific DNA binding|organic substance metabolic process|biosynthetic process|nitrogen compound metabolic process|primary metabolic process|nucleic acid binding|nucleobase-containing compound metabolic process|cellular aromatic compound metabolic process|RNA metabolic process|DNA binding|regulation of gene expres…	-	-	-	-	Chr06:8522207-8524109	66	61	44	14	18	14	5.83289	5.0779	3.70471	1.34168	1.43489	0.991363	4.87184	1.25598	1.95565	4.58425e-12	1.32445e-09	UP
Potri.010G072300	ATERF1,ERF1	ethylene response factor 1	GO:0008152|GO:0044237|GO:0003700|GO:0071704|GO:0009058|GO:0006807|GO:0044238|GO:0006139|GO:0006725|GO:0016070|GO:0010468|GO:0009059|GO:0006351|GO:0006355	metabolic process|cellular metabolic process|transcription factor activity, sequence-specific DNA binding|organic substance metabolic process|biosynthetic process|nitrogen compound metabolic process|primary metabolic process|nucleobase-containing compound metabolic process|cellular aromatic compound metabolic process|RNA metabolic process|regulation of gene expression|macromolecule biosynthetic p…	K14516	ethylene-responsive transcription factor 1[-]	ko04075|ko04016	Plant hormone signal transduction|MAPK signaling pathway - plant	Chr10:9920069-9920807	44	56	41	10	15	12	6.5301	7.82835	5.79707	1.60937	2.00801	1.42687	6.71851	1.68142	1.99846	4.60001e-12	1.32445e-09	UP
Potri.010G055400	GAPC,GAPC-1,GAPC1	glyceraldehyde-3-phosphate dehydrogenase C subunit 1	GO:0003824|GO:0008152|GO:0016491|GO:0055114|GO:0016620	catalytic activity|metabolic process|oxidoreductase activity|oxidation-reduction process|oxidoreductase activity, acting on the aldehyde or oxo group of donors, NAD or NADP as acceptor	K00134	glyceraldehyde 3-phosphate dehydrogenase[1.2.1.12]	ko01100|ko01100|ko01110|ko01130|ko01120|ko01230|ko01200|ko00010|ko00710|ko04066	Metabolic pathways|Metabolic pathways|Biosynthesis of secondary metabolites|Biosynthesis of antibiotics|Microbial metabolism in diverse environments|Biosynthesis of amino acids|Carbon metabolism|Glycolysis / Gluconeogenesis|Carbon fixation in photosynthetic organisms|HIF-1 signaling pathway	Chr10:8532476-8534770	159	136	162	47	66	91	12.8696	10.3686	12.4924	4.12543	4.81862	5.90154	11.9102	4.94853	1.26713	5.1335e-12	1.45904e-09	UP
Potri.009G069000	-	-	-	-	-	-	-	-	Chr09:6822186-6824477	4	7	4	24	38	35	0.951661	1.56851	0.906588	6.19196	8.15457	6.67149	1.14225	7.006	-2.61671	6.19108e-12	1.72673e-09	DOWN
Potri.011G131500	-	basic helix-loop-helix (bHLH) DNA-binding superfamily protein	-	-	-	-	-	-	Chr11:15667456-15672109	288	280	373	106	128	207	3.44455	3.15438	4.25018	1.37483	1.38089	1.98363	3.61637	1.57978	1.19482	7.68534e-12	2.10416e-09	UP
Potri.010G153000	POK1	phragmoplast orienting kinesin 1	GO:0003824|GO:0005622|GO:0005515|GO:0016787|GO:0007017|GO:0016817|GO:0000166|GO:0001882|GO:0005875|GO:0032549|GO:0016818|GO:0005871|GO:0015631|GO:0007018|GO:0008017|GO:0005856|GO:0016462|GO:0005524|GO:0003774|GO:0003777	catalytic activity|intracellular|protein binding|hydrolase activity|microtubule-based process|hydrolase activity, acting on acid anhydrides|nucleotide binding|nucleoside binding|microtubule associated complex|ribonucleoside binding|hydrolase activity, acting on acid anhydrides, in phosphorus-containing anhydrides|kinesin complex|tubulin binding|microtubule-based movement|microtubule binding|cytos…	-	-	-	-	Chr10:16066808-16079115	723	772	1144	340	366	540	10.8164	10.8787	16.3054	5.51603	4.93898	6.47278	12.6668	5.6426	1.16663	8.84406e-12	2.39939e-09	UP
Potri.005G154700	-	ATPase, F0 complex, subunit B/B\', bacterial/chloroplast	GO:0005215|GO:0008152|GO:0016020|GO:0044237|GO:0005622|GO:0022857|GO:0071704|GO:0009058|GO:0006807|GO:0044238|GO:0045263|GO:0055085|GO:0006139|GO:0006725|GO:0033177|GO:0006810|GO:0009116|GO:0034220|GO:1901137|GO:0006796|GO:0006811|GO:0009165|GO:0006812|GO:0015992|GO:0008324|GO:0006164|GO:0046034|GO:0015078|GO:0015986|GO:0006754	transporter activity|metabolic process|membrane|cellular metabolic process|intracellular|transmembrane transporter activity|organic substance metabolic process|biosynthetic process|nitrogen compound metabolic process|primary metabolic process|proton-transporting ATP synthase complex, coupling factor F(o)|transmembrane transport|nucleobase-containing compound metabolic process|cellular aromatic co…	K02109	F-type H+-transporting ATPase subunit b[-]	ko01100|ko01100|ko00190|ko00195	Metabolic pathways|Metabolic pathways|Oxidative phosphorylation|Photosynthesis	Chr05:14823481-14823969	910	897	1638	237	293	587	204.099	189.499	350.004	57.6436	59.276	105.485	247.867	74.1347	1.74135	9.2686e-12	2.49192e-09	UP
Potri.003G022900	ATBXL4,XYL4	beta-D-xylosidase 4	GO:0003824|GO:0008152|GO:0071704|GO:0016787|GO:0044238|GO:0005975|GO:0016798|GO:0004553	catalytic activity|metabolic process|organic substance metabolic process|hydrolase activity|primary metabolic process|carbohydrate metabolic process|hydrolase activity, acting on glycosyl bonds|hydrolase activity, hydrolyzing O-glycosyl compounds	K15920	beta-D-xylosidase 4[3.2.1.37]	ko01100|ko01100|ko00520	Metabolic pathways|Metabolic pathways|Amino sugar and nucleotide sugar metabolism	Chr03:2731107-2735818	165	192	197	88	89	108	7.11894	7.80278	8.09763	4.11734	3.46364	3.73344	7.67312	3.77147	1.02468	1.45095e-11	3.76529e-09	UP
Potri.013G136598	-	structural constituent of ribosome	-	-	K02982	small subunit ribosomal protein S3[-]	ko03010	Ribosome	Chr13:14661052-14661624	1140	1086	2055	312	326	721	218.202	195.794	374.736	64.7606	56.2837	110.571	262.911	77.2051	1.7678	1.97402e-11	5.03511e-09	UP
Potri.001G027100	-	Major facilitator superfamily protein	GO:0005215|GO:0016020|GO:0006810	transporter activity|membrane|transport	-	-	-	-	Chr01:1993890-1997771	38	51	51	11	15	15	2.25764	2.85408	2.88672	0.708751	0.803855	0.714028	2.66615	0.742211	1.84485	3.14278e-11	7.8815e-09	UP
Potri.013G139600	-	NAD(P)H dehydrogenase subunit H	-	-	-	-	-	-	Chr13:14779861-14780816	60	63	139	10	11	27	11.2679	11.1442	24.8696	2.03652	1.86337	4.06259	15.7606	2.65416	2.57	4.53907e-11	1.1013e-08	UP
Potri.013G082800	-	Phosphorylase superfamily protein	GO:0003824|GO:0008152|GO:0044237|GO:0071704|GO:0006807|GO:0044238|GO:0006139|GO:0006725|GO:0009116	catalytic activity|metabolic process|cellular metabolic process|organic substance metabolic process|nitrogen compound metabolic process|primary metabolic process|nucleobase-containing compound metabolic process|cellular aromatic compound metabolic process|nucleoside metabolic process	-	-	-	-	Chr13:7498644-7500286	4	0	0	17	18	21	0.273003	0	0	1.25815	1.10809	1.14833	0.091001	1.17152	-3.68636	4.68555e-11	1.11421e-08	DOWN
Potri.016G094066	-	unfolded protein binding	GO:0008152|GO:0016020|GO:0044237|GO:0005622|GO:0016021|GO:0009579|GO:0015979|GO:0009521|GO:0009522	metabolic process|membrane|cellular metabolic process|intracellular|integral component of membrane|thylakoid|photosynthesis|photosystem|photosystem I	-	-	-	-	Chr16:8215607-8216716	963	1033	1981	230	280	632	95.1507	96.1394	186.479	24.6443	24.9549	50.0328	125.923	33.2107	1.92282	4.70429e-11	1.11421e-08	UP
Potri.005G154600	-	ATP synthase subunit alpha	GO:0003824|GO:0005215|GO:0008152|GO:0016020|GO:0044237|GO:0022857|GO:0071704|GO:0006807|GO:0016787|GO:0044238|GO:0016817|GO:0033178|GO:0000166|GO:0001882|GO:0055085|GO:0006139|GO:0006725|GO:0006810|GO:0009116|GO:0034220|GO:0032549|GO:0016820|GO:0006796|GO:0006811|GO:0006812|GO:0015992|GO:0005524|GO:0015991|GO:0046034	catalytic activity|transporter activity|metabolic process|membrane|cellular metabolic process|transmembrane transporter activity|organic substance metabolic process|nitrogen compound metabolic process|hydrolase activity|primary metabolic process|hydrolase activity, acting on acid anhydrides|proton-transporting two-sector ATPase complex, catalytic domain|nucleotide binding|nucleoside binding|trans…	-	-	-	-	Chr05:14821902-14823423	1330	1528	2984	350	374	884	101.087	109.391	216.073	28.8478	25.6404	53.8327	142.184	36.107	1.97741	4.88357e-11	1.14756e-08	UP
Potri.006G079200	CAS1	cycloartenol synthase 1	GO:0003824	catalytic activity	K01853	cycloartenol synthase[5.4.99.8]	ko01100|ko01100|ko01110|ko00100	Metabolic pathways|Metabolic pathways|Biosynthesis of secondary metabolites|Steroid biosynthesis	Chr06:5991857-6000291	109	100	99	43	46	52	3.01047	2.6015	2.60498	1.2879	1.14598	1.15071	2.73899	1.19486	1.1968	5.07917e-11	1.1842e-08	UP
Potri.007G127100	-	-	-	-	-	-	-	-	Chr07:14324526-14324621	25	29	22	7	1	1	28.5619	31.2068	23.9456	8.67203	1.0305	0.915759	27.9048	3.53943	2.97892	5.77849e-11	1.32652e-08	UP
Potri.013G136730	-	ribosomal protein S11	GO:0005198|GO:0008152|GO:0044237|GO:0005622|GO:0071704|GO:0009058|GO:0003735|GO:0006807|GO:0044238|GO:0005737|GO:0019538|GO:0005840|GO:0009059|GO:0006412|GO:0043043	structural molecule activity|metabolic process|cellular metabolic process|intracellular|organic substance metabolic process|biosynthetic process|structural constituent of ribosome|nitrogen compound metabolic process|primary metabolic process|cytoplasm|protein metabolic process|ribosome|macromolecule biosynthetic process|translation|peptide biosynthetic process	K03040|K02948	DNA-directed RNA polymerase subunit alpha[2.7.7.6]|small subunit ribosomal protein S11[-]	ko01100|ko01100|ko03010|ko00230|ko00240	Metabolic pathways|Metabolic pathways|Ribosome|Purine metabolism|Pyrimidine metabolism	Chr13:14665244-14665681	334	305	668	74	81	194	83.6337	71.9366	159.357	20.0942	18.2949	38.9213	104.976	25.7701	2.02628	6.10039e-11	1.3792e-08	UP
Potri.013G025700	-	Protein kinase superfamily protein	GO:0003824|GO:0008152|GO:0044237|GO:0071704|GO:0016740|GO:0044238|GO:0016772|GO:0019538|GO:0016301|GO:0006796|GO:0016773|GO:0006464|GO:0016310|GO:0004672|GO:0006468	catalytic activity|metabolic process|cellular metabolic process|organic substance metabolic process|transferase activity|primary metabolic process|transferase activity, transferring phosphorus-containing groups|protein metabolic process|kinase activity|phosphate-containing compound metabolic process|phosphotransferase activity, alcohol group as acceptor|cellular protein modification process|phosp…	-	-	-	-	Chr13:1673482-1676088	24	30	19	65	76	73	1.69927	2.00073	1.28164	4.99085	4.85378	4.14128	1.66055	4.66197	-1.48928	8.45077e-11	1.77603e-08	DOWN
Potri.T006200	-	ribulose-bisphosphate carboxylases	GO:0043169|GO:0046872|GO:0000287	cation binding|metal ion binding|magnesium ion binding	-	-	-	-	scaffold_22:37058-38271	9	13	25	0	0	0	2.00626	2.72969	5.30928	0	0	0	3.34841	0	Inf	8.43619e-11	1.77603e-08	UP
Potri.006G190400	-	-	-	-	-	-	-	-	Chr06:20507576-20509927	99	114	128	47	56	52	4.99212	5.41465	6.14918	2.57009	2.54711	2.10091	5.51865	2.40604	1.19766	8.92965e-11	1.85061e-08	UP
Potri.013G136532	-	ribosomal protein L22	GO:0005198|GO:0008152|GO:0044237|GO:0005622|GO:0071704|GO:0009058|GO:0003735|GO:0006807|GO:0044238|GO:0005737|GO:0019538|GO:0005840|GO:0015934|GO:0009059|GO:0006412|GO:0043043	structural molecule activity|metabolic process|cellular metabolic process|intracellular|organic substance metabolic process|biosynthetic process|structural constituent of ribosome|nitrogen compound metabolic process|primary metabolic process|cytoplasm|protein metabolic process|ribosome|large ribosomal subunit|macromolecule biosynthetic process|translation|peptide biosynthetic process	K02890	large subunit ribosomal protein L22[-]	ko03010	Ribosome	Chr13:14660556-14660867	415	467	925	118	142	284	145.882	154.627	309.781	44.9821	45.0252	79.9878	203.43	56.665	1.844	9.33953e-11	1.90904e-08	UP
Potri.001G368200	-	-	-	-	-	-	-	-	Chr01:38140812-38148412	148	137	220	59	70	82	3.4223	2.98396	4.84662	1.47949	1.46003	1.51922	3.75096	1.48625	1.33559	1.14141e-10	2.27087e-08	UP
Potri.005G154400	-	maturase K	-	-	-	-	-	-	Chr05:14815884-14816709	448	476	1037	92	150	280	79.5057	79.5686	175.331	17.7055	24.0118	39.8135	111.468	27.1769	2.03618	1.17821e-10	2.31557e-08	UP
Potri.005G113900	F3\'H,F3H,TT6	flavanone 3-hydroxylase	GO:0003824|GO:0008152|GO:0016491|GO:0055114	catalytic activity|metabolic process|oxidoreductase activity|oxidation-reduction process	K00475	naringenin 3-dioxygenase[1.14.11.9]	ko01100|ko01100|ko01110|ko00941	Metabolic pathways|Metabolic pathways|Biosynthesis of secondary metabolites|Flavonoid biosynthesis	Chr05:8755904-8757972	14	10	12	0	0	0	1.26687	0.852348	1.0345	0	0	0	1.05124	0	Inf	1.20353e-10	2.33227e-08	UP
Potri.010G052900	-	Ycf1 protein	-	-	-	-	-	-	Chr10:8333019-8333500	156	152	243	38	41	98	35.4964	32.5778	52.6778	9.3766	8.41502	17.8665	40.2507	11.8861	1.75974	1.33761e-10	2.57538e-08	UP
Potri.007G011300	-	Kinase interacting (KIP1-like) family protein	-	-	-	-	-	-	Chr07:897789-901208	40	41	43	8	9	19	1.45603	1.40577	1.49121	0.315812	0.295503	0.554148	1.451	0.388488	1.90111	1.37393e-10	2.62834e-08	UP
Potri.005G150200	-	acetyl-CoA carboxylase carboxyl transferase subunit beta	-	-	K01963	acetyl-CoA carboxylase carboxyl transferase subunit beta[6.4.1.2]	ko01100|ko01100|ko01110|ko01130|ko01120|ko01200|ko00620|ko01212|ko00640|ko00061|ko00720	Metabolic pathways|Metabolic pathways|Biosynthesis of secondary metabolites|Biosynthesis of antibiotics|Microbial metabolism in diverse environments|Carbon metabolism|Pyruvate metabolism|Fatty acid metabolism|Propanoate metabolism|Fatty acid biosynthesis|Carbon fixation pathways in prokaryotes	Chr05:13493293-13493694	308	287	576	67	74	188	84.0298	73.753	149.715	19.8224	18.2106	41.0954	102.499	26.3761	1.95831	1.59946e-10	3.02106e-08	UP
Potri.013G137700	-	ATP synthase subunit C family protein	GO:0005215|GO:0016020|GO:0022857|GO:0055085|GO:0033177|GO:0006810|GO:0034220|GO:0006811|GO:0006812|GO:0015992|GO:0015991|GO:0008324|GO:0015078	transporter activity|membrane|transmembrane transporter activity|transmembrane transport|proton-transporting two-sector ATPase complex, proton-transporting domain|transport|ion transmembrane transport|ion transport|cation transport|proton transport|ATP hydrolysis coupled proton transport|cation transmembrane transporter activity|hydrogen ion transmembrane transporter activity	K02110	F-type H+-transporting ATPase subunit c[-]	ko01100|ko01100|ko00190|ko00195	Metabolic pathways|Metabolic pathways|Oxidative phosphorylation|Photosynthesis	Chr13:14717949-14718194	64	85	136	12	12	38	28.5333	35.6951	57.7661	5.80181	4.82574	13.574	40.6649	8.06717	2.33365	1.69721e-10	3.18552e-08	UP
Potri.001G109400	-	GRAS family transcription factor	-	-	-	-	-	-	Chr01:8694950-8697871	166	206	176	77	110	101	6.5255	7.62758	6.59138	3.28246	3.90038	3.18112	6.91482	3.45465	1.00115	1.70838e-10	3.18645e-08	UP
Potri.013G136664	-	ribosomal protein L14	GO:0005198|GO:0008152|GO:0044237|GO:0005622|GO:0071704|GO:0009058|GO:0003735|GO:0006807|GO:0044238|GO:0005737|GO:0019538|GO:0005840|GO:0009059|GO:0006412|GO:0043043	structural molecule activity|metabolic process|cellular metabolic process|intracellular|organic substance metabolic process|biosynthetic process|structural constituent of ribosome|nitrogen compound metabolic process|primary metabolic process|cytoplasm|protein metabolic process|ribosome|macromolecule biosynthetic process|translation|peptide biosynthetic process	K02874	large subunit ribosomal protein L14[-]	ko03010	Ribosome	Chr13:14663541-14663858	456	502	1052	110	147	305	157.27	163.08	345.666	41.1411	45.7311	84.2816	222.005	57.0513	1.96026	1.74238e-10	3.22968e-08	UP
Potri.002G131650	-	-	-	-	-	-	-	-	Chr02:9851146-9851852	18	16	11	1	0	1	2.7923	2.33783	1.62572	0.168163	0	0.124346	2.25195	0.0975032	4.52958	2.48702e-10	4.44432e-08	UP
Potri.005G194350	-	-	-	-	-	-	-	-	Chr05:21128703-21137398	304	332	510	109	163	231	3.86431	3.97513	6.17629	1.50255	1.86895	2.35268	4.67191	1.90806	1.29191	2.74129e-10	4.86525e-08	UP
Potri.019G028500	-	ATP synthase subunit C family protein	GO:0005215|GO:0016020|GO:0022857|GO:0055085|GO:0033177|GO:0006810|GO:0034220|GO:0006811|GO:0006812|GO:0015992|GO:0015991|GO:0008324|GO:0015078	transporter activity|membrane|transmembrane transporter activity|transmembrane transport|proton-transporting two-sector ATPase complex, proton-transporting domain|transport|ion transmembrane transport|ion transport|cation transport|proton transport|ATP hydrolysis coupled proton transport|cation transmembrane transporter activity|hydrogen ion transmembrane transporter activity	K02110	F-type H+-transporting ATPase subunit c[-]	ko01100|ko01100|ko00190|ko00195	Metabolic pathways|Metabolic pathways|Oxidative phosphorylation|Photosynthesis	Chr19:3201858-3202760	153	186	240	31	54	108	18.5829	21.2789	27.771	4.08306	5.91595	10.5099	22.5443	6.83629	1.72147	2.75518e-10	4.86525e-08	UP
Potri.002G017200	-	DC1 domain-containing protein	-	-	-	-	-	-	Chr02:995379-1000788	49	63	41	98	141	130	2.59744	3.14559	2.07058	5.63345	6.74187	5.52131	2.60454	5.96554	-1.19563	5.03305e-10	8.29841e-08	DOWN
Potri.008G011300	AtEIN3,EIN3	Ethylene insensitive 3 family protein	-	-	K14514	ethylene-insensitive protein 3[-]	ko04075|ko04016	Plant hormone signal transduction|MAPK signaling pathway - plant	Chr08:626989-630944	2425	2497	189	129	107	135	23.071	22.3763	1.71307	1.3309	0.918223	1.02906	15.7201	1.09273	3.84661	5.07971e-10	8.30494e-08	UP
Potri.011G039000	-	S-locus lectin protein kinase family protein	GO:0003824|GO:0008152|GO:0044237|GO:0071704|GO:0016740|GO:0044238|GO:0016772|GO:0048544|GO:0019538|GO:0016301|GO:0006796|GO:0016773|GO:0006464|GO:0016310|GO:0004672|GO:0006468	catalytic activity|metabolic process|cellular metabolic process|organic substance metabolic process|transferase activity|primary metabolic process|transferase activity, transferring phosphorus-containing groups|recognition of pollen|protein metabolic process|kinase activity|phosphate-containing compound metabolic process|phosphotransferase activity, alcohol group as acceptor|cellular protein modi…	-	-	-	-	Chr11:3302238-3305327	22	21	33	3	4	6	0.974898	0.876514	1.3932	0.144166	0.159883	0.213042	1.08154	0.172364	2.64955	5.09266e-10	8.30494e-08	UP
Potri.019G031200	APY2,ATAPY2	apyrase 2	GO:0003824|GO:0016787	catalytic activity|hydrolase activity	K14641	apyrase[3.6.1.5]	ko00230|ko00240	Purine metabolism|Pyrimidine metabolism	Chr19:3509176-3511851	89	110	94	43	43	52	6.72255	7.82618	6.76438	3.52221	2.92968	3.14702	7.10437	3.19964	1.1508	6.05946e-10	9.82786e-08	UP
Potri.002G131750	-	-	-	-	-	-	-	-	Chr02:9852285-9853624	17	16	15	2	2	0	5.65003	5.00863	4.74947	0.72097	0.599562	0	5.13604	0.440177	3.5445	6.81948e-10	1.09416e-07	UP
Potri.004G099400	BEE3	BR enhanced expression 3	GO:0005515|GO:0046983	protein binding|protein dimerization activity	-	-	-	-	Chr04:8598984-8600822	56	59	50	19	18	25	5.78321	5.73916	4.91945	2.12783	1.67674	2.06857	5.48061	1.95772	1.48516	7.38492e-10	1.16608e-07	UP
Potri.012G027700	-	chloroplast ribosomal protein S15	GO:0005198|GO:0008152|GO:0044237|GO:0005622|GO:0071704|GO:0009058|GO:0003735|GO:0006807|GO:0044238|GO:0005737|GO:0019538|GO:0005840|GO:0009059|GO:0006412|GO:0043043	structural molecule activity|metabolic process|cellular metabolic process|intracellular|organic substance metabolic process|biosynthetic process|structural constituent of ribosome|nitrogen compound metabolic process|primary metabolic process|cytoplasm|protein metabolic process|ribosome|macromolecule biosynthetic process|translation|peptide biosynthetic process	K02956	small subunit ribosomal protein S15[-]	ko03010	Ribosome	Chr12:2411401-2411720	85	125	224	37	39	49	29.1326	40.3537	73.142	13.752	12.0568	13.4557	47.5428	13.0882	1.86096	8.15749e-10	1.28128e-07	UP
Potri.003G087400	-	Protein of unknown function (DUF2921)	-	-	-	-	-	-	Chr03:11473672-11476594	28	29	32	8	7	6	1.05059	1.02493	1.1439	0.325536	0.236912	0.180389	1.07314	0.247613	2.11568	8.66695e-10	1.34014e-07	UP
Potri.007G135100	ATHB52,HB52	homeobox protein 52	GO:0003676|GO:0003677	nucleic acid binding|DNA binding	-	-	-	-	Chr07:14813910-14814486	27	22	18	3	5	2	5.13212	3.93895	3.25968	0.618391	0.85726	0.304551	4.11025	0.593401	2.79215	1.02022e-09	1.54551e-07	UP
Potri.010G196400	-	-	-	-	-	-	-	-	Chr10:18968204-18970018	22	18	31	47	93	105	2.97152	2.29006	3.98915	6.88418	11.3304	11.363	3.08358	9.8592	-1.67686	1.20623e-09	1.76458e-07	DOWN
Potri.012G019900	-	ARM repeat superfamily protein	GO:0003824|GO:0008152|GO:0044237|GO:0005515|GO:0071704|GO:0016740|GO:0044238|GO:0019538|GO:0004842|GO:0006464|GO:0016567	catalytic activity|metabolic process|cellular metabolic process|protein binding|organic substance metabolic process|transferase activity|primary metabolic process|protein metabolic process|ubiquitin-protein transferase activity|cellular protein modification process|protein ubiquitination	-	-	-	-	Chr12:1803938-1809534	55	61	90	18	22	31	1.27718	1.33425	1.9911	0.453286	0.460811	0.576774	1.53418	0.496957	1.62627	1.22133e-09	1.77796e-07	UP
Potri.013G138201	-	maturase K	GO:0008152|GO:0044237|GO:0071704|GO:0006807|GO:0044238|GO:0006139|GO:0006725|GO:0016070|GO:0006396|GO:0006397	metabolic process|cellular metabolic process|organic substance metabolic process|nitrogen compound metabolic process|primary metabolic process|nucleobase-containing compound metabolic process|cellular aromatic compound metabolic process|RNA metabolic process|RNA processing|mRNA processing	-	-	-	-	Chr13:14726901-14728433	136	135	342	18	36	75	9.72983	9.09735	23.3105	1.39652	2.32316	4.29914	14.0459	2.67294	2.39365	1.37374e-09	1.99012e-07	UP
Potri.003G151000	-	Integrase-type DNA-binding superfamily protein	GO:0008152|GO:0044237|GO:0003700|GO:0071704|GO:0009058|GO:0006807|GO:0044238|GO:0006139|GO:0006725|GO:0016070|GO:0010468|GO:0009059|GO:0006351|GO:0006355	metabolic process|cellular metabolic process|transcription factor activity, sequence-specific DNA binding|organic substance metabolic process|biosynthetic process|nitrogen compound metabolic process|primary metabolic process|nucleobase-containing compound metabolic process|cellular aromatic compound metabolic process|RNA metabolic process|regulation of gene expression|macromolecule biosynthetic p…	-	-	-	-	Chr03:16497944-16498913	49	43	58	12	22	16	5.54032	4.57953	6.24776	1.47139	2.24372	1.44949	5.45587	1.72153	1.66411	1.50192e-09	2.16531e-07	UP
Potri.016G012150	-	Leucine-rich repeat transmembrane protein kinase	GO:0003824|GO:0008152|GO:0044237|GO:0005515|GO:0071704|GO:0016740|GO:0044238|GO:0016772|GO:0019538|GO:0016301|GO:0006796|GO:0016773|GO:0006464|GO:0016310|GO:0004672|GO:0006468	catalytic activity|metabolic process|cellular metabolic process|protein binding|organic substance metabolic process|transferase activity|primary metabolic process|transferase activity, transferring phosphorus-containing groups|protein metabolic process|kinase activity|phosphate-containing compound metabolic process|phosphotransferase activity, alcohol group as acceptor|cellular protein modificati…	-	-	-	-	Chr16:653917-664890	115	129	128	61	65	62	4.5981	4.85834	4.87586	2.64496	2.34426	1.98622	4.77743	2.32515	1.03891	1.53521e-09	2.20266e-07	UP
Potri.013G074700	-	NAD(P)H dehydrogenase subunit H	GO:0003824|GO:0008152|GO:0016491|GO:0048037|GO:0016651|GO:0055114|GO:0048038|GO:0000166|GO:0050662|GO:0051287	catalytic activity|metabolic process|oxidoreductase activity|cofactor binding|oxidoreductase activity, acting on NAD(P)H|oxidation-reduction process|quinone binding|nucleotide binding|coenzyme binding|NAD binding	K05579	NAD(P)H-quinone oxidoreductase subunit H[1.6.5.3]	ko01100|ko01100|ko00190	Metabolic pathways|Metabolic pathways|Oxidative phosphorylation	Chr13:6402922-6404074	116	114	265	26	32	69	16.1862	14.9833	35.2283	3.93419	4.02759	7.71412	22.1326	5.2253	2.08259	1.70116e-09	2.37232e-07	UP
Potri.018G031500	-	mitochondrial ribosomal protein S4	GO:0003676|GO:0003723	nucleic acid binding|RNA binding	K02986	small subunit ribosomal protein S4[-]	ko03010	Ribosome	Chr18:2436803-2437783	196	259	498	64	70	149	21.9127	27.2744	53.043	7.75922	7.05907	13.3468	34.0767	9.38837	1.85984	1.74653e-09	2.40192e-07	UP
Potri.019G028600	-	ATPase, F0 complex, subunit A protein	GO:0005215|GO:0008152|GO:0044237|GO:0022857|GO:0071704|GO:0009058|GO:0006807|GO:0044238|GO:0055085|GO:0006139|GO:0006725|GO:0006810|GO:0009116|GO:0034220|GO:1901137|GO:0006796|GO:0006811|GO:0009165|GO:0006812|GO:0015992|GO:0008324|GO:0006164|GO:0046034|GO:0015078|GO:0015986|GO:0006754	transporter activity|metabolic process|cellular metabolic process|transmembrane transporter activity|organic substance metabolic process|biosynthetic process|nitrogen compound metabolic process|primary metabolic process|transmembrane transport|nucleobase-containing compound metabolic process|cellular aromatic compound metabolic process|transport|nucleoside metabolic process|ion transmembrane tran…	K02108	F-type H+-transporting ATPase subunit a[-]	ko01100|ko01100|ko00190|ko00195	Metabolic pathways|Metabolic pathways|Oxidative phosphorylation|Photosynthesis	Chr19:3203146-3203886	574	619	1360	156	196	409	84.9576	86.2971	191.774	25.039	26.1673	48.5026	121.009	33.2363	1.86429	1.76557e-09	2.41697e-07	UP
Potri.013G138000	-	ATP synthase subunit alpha	GO:0003824|GO:0005215|GO:0008152|GO:0016020|GO:0044237|GO:0022857|GO:0071704|GO:0006807|GO:0016787|GO:0044238|GO:0016817|GO:0033178|GO:0000166|GO:0001882|GO:0055085|GO:0006139|GO:0006725|GO:0006810|GO:0009116|GO:0034220|GO:0032549|GO:0016820|GO:0006796|GO:0006811|GO:0006812|GO:0015992|GO:0005524|GO:0015991|GO:0046034	catalytic activity|transporter activity|metabolic process|membrane|cellular metabolic process|transmembrane transporter activity|organic substance metabolic process|nitrogen compound metabolic process|hydrolase activity|primary metabolic process|hydrolase activity, acting on acid anhydrides|proton-transporting two-sector ATPase complex, catalytic domain|nucleotide binding|nucleoside binding|trans…	K02111	F-type H+-transporting ATPase subunit alpha[3.6.3.14]	ko01100|ko01100|ko00190|ko00195	Metabolic pathways|Metabolic pathways|Oxidative phosphorylation|Photosynthesis	Chr13:14719972-14721495	289	339	596	73	81	214	20.798	22.9794	40.8629	5.697	5.25797	12.3393	28.2134	7.76476	1.86137	1.79245e-09	2.44256e-07	UP
Potri.004G101600	-	-	-	-	-	-	-	-	Chr04:8905575-8907721	95	107	85	34	47	57	4.33229	4.59612	3.69292	1.68142	1.93331	2.08268	4.20711	1.89914	1.14749	2.6782e-09	3.53653e-07	UP
Potri.014G015000	-	-	-	-	-	-	-	-	Chr14:1478676-1479812	73	79	76	28	41	25	10.8193	11.0287	10.7313	4.50026	5.48113	2.96868	10.8598	4.31669	1.33099	3.27293e-09	4.19202e-07	UP
Potri.013G142166	-	RNA polymerase subunit beta	GO:0003824|GO:0008152|GO:0044237|GO:0071704|GO:0009058|GO:0006807|GO:0016740|GO:0044238|GO:0016772|GO:0003676|GO:0001882|GO:0006139|GO:0006725|GO:0016070|GO:0003677|GO:0016779|GO:0032549|GO:0009059|GO:0006351|GO:0003899	catalytic activity|metabolic process|cellular metabolic process|organic substance metabolic process|biosynthetic process|nitrogen compound metabolic process|transferase activity|primary metabolic process|transferase activity, transferring phosphorus-containing groups|nucleic acid binding|nucleoside binding|nucleobase-containing compound metabolic process|cellular aromatic compound metabolic proce…	-	-	-	-	Chr13:14870394-14871677	607	625	1291	144	212	437	51.848	50.2851	105.058	13.3385	16.334	29.9073	69.0637	19.8599	1.79807	3.60285e-09	4.49873e-07	UP
Potri.T058850	-	photsystem I subunit I	GO:0008152|GO:0016020|GO:0044237|GO:0005622|GO:0009579|GO:0015979|GO:0009521|GO:0009522	metabolic process|membrane|cellular metabolic process|intracellular|thylakoid|photosynthesis|photosystem|photosystem I	K02696	photosystem I subunit VIII[-]	ko01100|ko01100|ko00195	Metabolic pathways|Metabolic pathways|Photosynthesis	scaffold_56:84309-84479	66	94	146	17	28	47	42.3311	56.7881	89.2123	11.8236	16.1987	24.1527	62.7772	17.3917	1.85184	3.6848e-09	4.5819e-07	UP
Potri.001G400000	ATCOX17,COX17	cytochrome c oxidase 17	GO:0005622|GO:0016531|GO:0043169|GO:0005758|GO:0005737|GO:0006810|GO:0043231|GO:0005739|GO:0005740|GO:0006811|GO:0046872|GO:0006812|GO:0005507|GO:0030001|GO:0006825	intracellular|copper chaperone activity|cation binding|mitochondrial intermembrane space|cytoplasm|transport|intracellular membrane-bounded organelle|mitochondrion|mitochondrial envelope|ion transport|metal ion binding|cation transport|copper ion binding|metal ion transport|copper ion transport	K02260	cytochrome c oxidase assembly protein subunit 17[-]	ko01100|ko01100|ko00190	Metabolic pathways|Metabolic pathways|Oxidative phosphorylation	Chr01:42181046-42183237	39	31	33	8	10	12	1.95136	1.46096	1.57307	0.434098	0.451313	0.481047	1.66179	0.455486	1.86726	3.83898e-09	4.75381e-07	UP
Potri.005G114100	-	Chalcone-flavanone isomerase family protein	-	-	-	-	-	-	Chr05:8770612-8772197	150	168	143	77	84	65	13.4516	14.1908	12.2173	7.4882	6.79471	4.67036	13.2866	6.31776	1.07248	4.19458e-09	5.10935e-07	UP
Potri.007G138600	TPX2	targeting protein for XKLP2	GO:0008152|GO:0044237|GO:0005622|GO:0071704|GO:0044238|GO:0007017|GO:0007049|GO:0050790|GO:0005874|GO:0051726|GO:0043085|GO:0019538|GO:0000278|GO:0005819|GO:0000226|GO:0006796|GO:0005856|GO:0007010|GO:0006464|GO:0060236|GO:0016310|GO:0006468|GO:0032147	metabolic process|cellular metabolic process|intracellular|organic substance metabolic process|primary metabolic process|microtubule-based process|cell cycle|regulation of catalytic activity|microtubule|regulation of cell cycle|positive regulation of catalytic activity|protein metabolic process|mitotic cell cycle|spindle|microtubule cytoskeleton organization|phosphate-containing compound metaboli…	-	-	-	-	Chr07:15008447-15013601	178	194	269	95	106	130	6.03467	6.19516	8.68854	3.49267	3.24153	3.53125	6.97279	3.42182	1.02697	5.60621e-09	6.56102e-07	UP
Potri.T105200	emb2734	ARM repeat superfamily protein	-	-	-	-	-	-	scaffold_156:957-12110	16	19	30	4	3	2	0.111243	0.124425	0.19871	0.0301555	0.0188135	0.0111395	0.144793	0.0200362	2.85331	5.91303e-09	6.86625e-07	UP
Potri.001G331000	-	photosystem II reaction center protein D	GO:0009055|GO:0008152|GO:0044237|GO:0045156|GO:0022900|GO:0055114|GO:0015979|GO:0009767|GO:0019684|GO:0009772	electron carrier activity|metabolic process|cellular metabolic process|electron transporter, transferring electrons within the cyclic electron transport pathway of photosynthesis activity|electron transport chain|oxidation-reduction process|photosynthesis|photosynthetic electron transport chain|photosynthesis, light reaction|photosynthetic electron transport in photosystem II	K02706	photosystem II P680 reaction center D2 protein[1.10.3.9]	ko01100|ko01100|ko00195	Metabolic pathways|Metabolic pathways|Photosynthesis	Chr01:33457530-33457793	34	42	82	5	9	18	14.1251	16.4351	32.4548	2.25277	3.37254	5.99142	21.005	3.87224	2.43949	5.94543e-09	6.87711e-07	UP
Potri.003G065100	-	Tetratricopeptide repeat (TPR)-like superfamily protein	-	-	-	-	-	-	Chr03:9386830-9388800	327	291	563	73	126	224	71.5844	60.0039	117.419	17.3298	24.88	39.289	83.0025	27.1663	1.61134	6.10813e-09	7.03803e-07	UP
Potri.013G141700	-	Tetratricopeptide repeat (TPR)-like superfamily protein	-	-	-	-	-	-	Chr13:14851611-14851856	37	37	61	12	8	17	16.4958	15.538	25.9099	5.80181	3.21716	6.07244	19.3146	5.03047	1.94092	7.33798e-09	8.29498e-07	UP
Potri.015G141300	-	PEBP (phosphatidylethanolamine-binding protein) family protein	-	-	-	-	-	-	Chr15:14845355-14846276	21	20	22	63	60	58	3.74508	3.3595	3.73784	12.1836	9.65149	8.28724	3.61414	10.0408	-1.47415	7.87211e-09	8.83186e-07	DOWN
Potri.011G140600	ATGSTU22,GSTU22	glutathione S-transferase TAU 22	GO:0005515	protein binding	K00799	glutathione S-transferase[2.5.1.18]	ko00480|ko01524|ko05418|ko00980|ko00982	Glutathione metabolism|Platinum drug resistance|Fluid shear stress and atherosclerosis|Metabolism of xenobiotics by cytochrome P450|Drug metabolism - cytochrome P450	Chr11:16257878-16258819	0	0	0	12	10	9	0	0	0	1.67911	1.16386	0.930373	0	1.25778	#NAME?	8.08737e-09	9.03938e-07	DOWN
Potri.013G041700	HEL,PR-4,PR4	pathogenesis-related 4	GO:0009607|GO:0006950|GO:0006952|GO:0008061|GO:0050832|GO:0042742	response to biotic stimulus|response to stress|defense response|chitin binding|defense response to fungus|defense response to bacterium	-	-	-	-	Chr13:2932139-2932999	16	19	20	2	5	1	2.8033	3.13548	3.33835	0.380064	0.790158	0.140436	3.09237	0.436886	2.82339	8.15923e-09	9.08567e-07	UP
Potri.019G027800	-	DNA-directed RNA polymerase family protein	-	-	K03046	DNA-directed RNA polymerase subunit beta'[2.7.7.6]	ko01100|ko01100|ko00230|ko00240|ko03020	Metabolic pathways|Metabolic pathways|Purine metabolism|Pyrimidine metabolism|RNA polymerase	Chr19:3188159-3189742	227	249	517	62	92	170	17.5821	18.166	38.1501	5.20764	6.42751	10.5499	24.6327	7.395	1.73595	1.0127e-08	1.08713e-06	UP
Potri.002G020101	-	DEA(D/H)-box RNA helicase family protein	-	-	-	-	-	-	Chr02:1193098-1198311	26	33	21	5	7	7	0.676534	0.808801	0.520577	0.141099	0.164293	0.145929	0.668637	0.15044	2.15203	1.04643e-08	1.1074e-06	UP
Potri.T050200	RLM3	disease resistance protein (TIR-NBS class), putative	GO:0005515|GO:0051716|GO:0007165	protein binding|cellular response to stimulus|signal transduction	-	-	-	-	scaffold_47:252965-263334	79	89	105	37	47	47	1.6494	1.75029	2.08857	0.837736	0.885133	0.786238	1.82942	0.836369	1.12917	1.08701e-08	1.14224e-06	UP
Potri.013G067000	AtMYB56,MYB56	myb domain protein 56	-	-	-	-	-	-	Chr13:5265204-5267272	85	86	75	27	46	43	5.59569	5.33271	4.70386	1.92755	2.7315	2.26804	5.21075	2.30903	1.1742	1.09876e-08	1.15054e-06	UP
Potri.001G116400	-	chloroplast ribosomal protein S15	GO:0005198|GO:0008152|GO:0044237|GO:0005622|GO:0071704|GO:0009058|GO:0003735|GO:0006807|GO:0044238|GO:0005737|GO:0019538|GO:0005840|GO:0009059|GO:0006412|GO:0043043	structural molecule activity|metabolic process|cellular metabolic process|intracellular|organic substance metabolic process|biosynthetic process|structural constituent of ribosome|nitrogen compound metabolic process|primary metabolic process|cytoplasm|protein metabolic process|ribosome|macromolecule biosynthetic process|translation|peptide biosynthetic process	-	-	-	-	Chr01:9329193-9330578	40	33	56	11	12	16	16.2483	12.6263	21.6717	4.84576	4.39679	5.20744	16.8488	4.81666	1.80654	1.2056e-08	1.258e-06	UP
Potri.013G142232	-	RNA polymerase subunit beta	GO:0003824|GO:0008152|GO:0044237|GO:0071704|GO:0009058|GO:0006807|GO:0016740|GO:0044238|GO:0016772|GO:0003676|GO:0001882|GO:0006139|GO:0006725|GO:0016070|GO:0003677|GO:0016779|GO:0032549|GO:0009059|GO:0006351|GO:0003899	catalytic activity|metabolic process|cellular metabolic process|organic substance metabolic process|biosynthetic process|nitrogen compound metabolic process|transferase activity|primary metabolic process|transferase activity, transferring phosphorus-containing groups|nucleic acid binding|nucleoside binding|nucleobase-containing compound metabolic process|cellular aromatic compound metabolic proce…	K03043	DNA-directed RNA polymerase subunit beta[2.7.7.6]	ko01100|ko01100|ko00230|ko00240|ko03020	Metabolic pathways|Metabolic pathways|Purine metabolism|Pyrimidine metabolism|RNA polymerase	Chr13:14872051-14873682	699	883	1717	183	254	574	46.9748	55.8939	109.93	13.3365	15.3969	30.9067	70.9331	19.88	1.83514	1.54363e-08	1.57762e-06	UP
Potri.011G163500	MS5,TDM1	Tetratricopeptide repeat (TPR)-like superfamily protein	-	-	-	-	-	-	Chr11:18071683-18075479	84	94	109	35	56	46	4.18953	4.41599	5.17927	1.893	2.51931	1.8382	4.59493	2.0835	1.14103	1.55162e-08	1.58037e-06	UP
Potri.001G415800	-	basic helix-loop-helix (bHLH) DNA-binding superfamily protein	-	-	-	-	-	-	Chr01:44086990-44091664	77	83	139	32	45	29	1.80642	1.83408	3.10671	0.814096	0.952246	0.545107	2.24907	0.770483	1.54549	2.5564e-08	2.45307e-06	UP
Potri.013G129900	-	Protein of unknown function (DUF506)	-	-	-	-	-	-	Chr13:14163365-14164643	95	120	57	164	216	245	10.6754	12.7015	6.10224	19.9851	21.894	22.0585	9.82637	21.3125	-1.11697	3.45723e-08	3.27537e-06	DOWN
Potri.016G080800	-	-	-	-	-	-	-	-	Chr16:6267414-6268526	34	33	29	6	6	17	3.35042	3.06298	2.72247	0.641171	0.533303	1.34216	3.04529	0.838877	1.86005	3.67434e-08	3.42903e-06	UP
Potri.005G154900	-	ATP synthase subunit C family protein	GO:0005215|GO:0016020|GO:0022857|GO:0055085|GO:0033177|GO:0006810|GO:0034220|GO:0006811|GO:0006812|GO:0015992|GO:0015991|GO:0008324|GO:0015078	transporter activity|membrane|transmembrane transporter activity|transmembrane transport|proton-transporting two-sector ATPase complex, proton-transporting domain|transport|ion transmembrane transport|ion transport|cation transport|proton transport|ATP hydrolysis coupled proton transport|cation transmembrane transporter activity|hydrogen ion transmembrane transporter activity	K02110	F-type H+-transporting ATPase subunit c[-]	ko01100|ko01100|ko00190|ko00195	Metabolic pathways|Metabolic pathways|Oxidative phosphorylation|Photosynthesis	Chr05:14825201-14826149	601	614	1416	155	191	458	69.4572	66.8384	155.907	19.4257	19.9108	42.4091	97.4008	27.2485	1.83775	3.8327e-08	3.55215e-06	UP
Potri.013G075000	-	NADPH dehydrogenases	-	-	K05580	NAD(P)H-quinone oxidoreductase subunit I[1.6.5.3]	ko01100|ko01100|ko00190	Metabolic pathways|Metabolic pathways|Oxidative phosphorylation	Chr13:6409607-6409993	31	36	69	9	4	16	8.78541	9.60997	18.6298	2.76598	1.02251	3.6331	12.3417	2.47386	2.31871	4.09148e-08	3.76858e-06	UP
Potri.011G074201	-	-	-	-	-	-	-	-	Chr11:7199187-7199534	425	468	989	157	234	339	133.943	138.928	296.951	53.6575	66.5207	85.6015	189.941	68.5932	1.46941	4.58519e-08	4.17183e-06	UP
Potri.004G048750	HB-1	homeobox-1	GO:0003676|GO:0003677	nucleic acid binding|DNA binding	-	-	-	-	Chr04:3767456-3773674	540	569	895	255	286	477	19.6694	19.5221	31.0585	10.0726	9.3967	13.9209	23.4167	11.1301	1.07307	5.12373e-08	4.60887e-06	UP
Potri.014G003200	-	LRR and NB-ARC domains-containing disease resistance protein	-	-	-	-	-	-	Chr14:392258-397939	33	42	9	2	3	3	0.381174	0.456963	0.0990436	0.0250574	0.0312568	0.0277661	0.312393	0.0280268	3.47849	5.25534e-08	4.69352e-06	UP
Potri.019G026400	-	RmlC-like cupins superfamily protein	-	-	-	-	-	-	Chr19:3013873-3021966	17	21	38	4	4	6	0.0755291	0.0878786	0.160841	0.0192702	0.0160298	0.0213594	0.108083	0.0188864	2.51672	5.26867e-08	4.69352e-06	UP
Potri.019G060800	-	Leucine-rich repeat receptor-like protein kinase family protein	GO:0003824|GO:0008152|GO:0044237|GO:0071704|GO:0016740|GO:0044238|GO:0016772|GO:0000166|GO:0001882|GO:0019538|GO:0016301|GO:0032549|GO:0006796|GO:0016773|GO:0006464|GO:0016310|GO:0005524|GO:0004672|GO:0006468	catalytic activity|metabolic process|cellular metabolic process|organic substance metabolic process|transferase activity|primary metabolic process|transferase activity, transferring phosphorus-containing groups|nucleotide binding|nucleoside binding|protein metabolic process|kinase activity|ribonucleoside binding|phosphate-containing compound metabolic process|phosphotransferase activity, alcohol …	-	-	-	-	Chr19:9326152-9327455	50	55	47	12	27	23	4.71113	4.88123	4.21902	1.22616	2.29472	1.73634	4.60379	1.7524	1.39349	5.59276e-08	4.93801e-06	UP
Potri.016G094100	-	CemA-like proton extrusion protein-related	GO:0016020|GO:0016021	membrane|integral component of membrane	-	-	-	-	Chr16:8217264-8217950	287	342	715	77	79	232	45.8177	51.4272	108.747	13.3305	11.376	29.6751	68.664	18.1272	1.9214	6.30267e-08	5.49973e-06	UP
Potri.013G136466	-	ribosomal protein L2	GO:0005198|GO:0008152|GO:0044237|GO:0005622|GO:0071704|GO:0009058|GO:0003735|GO:0006807|GO:0044238|GO:0005737|GO:0019538|GO:0005840|GO:0009059|GO:0006412|GO:0043043	structural molecule activity|metabolic process|cellular metabolic process|intracellular|organic substance metabolic process|biosynthetic process|structural constituent of ribosome|nitrogen compound metabolic process|primary metabolic process|cytoplasm|protein metabolic process|ribosome|macromolecule biosynthetic process|translation|peptide biosynthetic process	K02886	large subunit ribosomal protein L2[-]	ko03010	Ribosome	Chr13:14658562-14658963	783	793	1792	185	198	588	213.621	203.785	465.779	54.7339	48.7259	128.532	294.395	77.3306	1.92864	6.55613e-08	5.70422e-06	UP
Potri.016G011200	-	Leucine-rich repeat transmembrane protein kinase	GO:0003824|GO:0008152|GO:0044237|GO:0071704|GO:0016740|GO:0044238|GO:0016772|GO:0019538|GO:0016301|GO:0006796|GO:0016773|GO:0006464|GO:0016310|GO:0004672|GO:0006468	catalytic activity|metabolic process|cellular metabolic process|organic substance metabolic process|transferase activity|primary metabolic process|transferase activity, transferring phosphorus-containing groups|protein metabolic process|kinase activity|phosphate-containing compound metabolic process|phosphotransferase activity, alcohol group as acceptor|cellular protein modification process|phosp…	-	-	-	-	Chr16:567282-577422	47	66	50	16	20	31	0.968744	1.28137	0.981856	0.35763	0.371839	0.511953	1.07732	0.413807	1.38042	7.52695e-08	6.4363e-06	UP
Potri.017G140600	-	plastid-encoded CLP P	-	-	-	-	-	-	Chr17:14835641-14836690	40	31	81	7	14	15	17.8335	13.018	34.4046	3.38421	5.63003	5.35811	21.752	4.79078	2.18281	7.77225e-08	6.62707e-06	UP
Potri.013G074900	-	NADH dehydrogenase family protein	GO:0008152|GO:0016020|GO:0055114	metabolic process|membrane|oxidation-reduction process	-	-	-	-	Chr13:6408512-6409298	170	188	442	45	49	130	55.4906	57.8019	137.452	15.9287	14.427	33.9988	83.5815	21.4515	1.96211	8.44043e-08	7.09543e-06	UP
Potri.015G045300	-	Calmodulin binding protein-like	GO:0005515|GO:0006950|GO:0005516	protein binding|response to stress|calmodulin binding	-	-	-	-	Chr15:4458577-4462451	7	10	9	0	0	0	0.479865	0.645653	0.587762	0	0	0	0.571093	0	Inf	8.95556e-08	7.44459e-06	UP
Potri.008G097700	-	DNA binding	GO:0005622|GO:0043231|GO:0005634	intracellular|intracellular membrane-bounded organelle|nucleus	-	-	-	-	Chr08:6100205-6108619	109	114	115	49	46	83	2.02004	1.99001	2.03044	0.984771	0.768955	1.23244	2.01349	0.995389	1.01637	9.09981e-08	7.5226e-06	UP
Potri.002G200300	ATCSLD5,CSLD5,SOS6	cellulose synthase-like D5	-	-	K00770	1,4-beta-D-xylan synthase[2.4.2.24]	ko01100|ko01100|ko00520	Metabolic pathways|Metabolic pathways|Amino sugar and nucleotide sugar metabolism	Chr02:16131663-16135657	104	102	105	53	60	48	3.14048	2.90119	3.02072	1.73557	1.63427	1.16132	3.0208	1.51039	1.00001	9.35788e-08	7.69331e-06	UP
Potri.T058800	-	unfolded protein binding	GO:0008152|GO:0016020|GO:0044237|GO:0005622|GO:0016021|GO:0009579|GO:0015979|GO:0009521|GO:0009522	metabolic process|membrane|cellular metabolic process|intracellular|integral component of membrane|thylakoid|photosynthesis|photosystem|photosystem I	-	-	-	-	scaffold_56:83563-83964	240	281	598	64	90	199	65.4778	72.2112	155.433	18.9348	22.148	43.4997	97.7073	28.1942	1.79307	9.50689e-08	7.77299e-06	UP
Potri.009G066600	CYCB1;4	Cyclin B1;4	GO:0005622|GO:0043231|GO:0005634	intracellular|intracellular membrane-bounded organelle|nucleus	K05868	cyclin B[-]	ko04110|ko04114|ko04218|ko04914|ko04068|ko04115	Cell cycle|Oocyte meiosis|Cellular senescence|Progesterone-mediated oocyte maturation|FoxO signaling pathway|p53 signaling pathway	Chr09:6693684-6697073	40	37	38	13	17	12	2.51406	2.19045	2.27537	0.886039	0.963766	0.604273	2.32663	0.818026	1.50802	9.53472e-08	7.77444e-06	UP
Potri.002G123900	-	C2H2-like zinc finger protein	-	-	-	-	-	-	Chr02:9277697-9278302	20	17	15	2	4	3	3.9099	3.13057	2.7938	0.4241	0.705367	0.469945	3.27809	0.533137	2.62028	9.71125e-08	7.8968e-06	UP
Potri.001G194800	-	Chloroplast Ycf2;ATPase, AAA type, core	GO:0005622|GO:0000166|GO:0001882|GO:0005737|GO:0043231|GO:0032549|GO:0009507|GO:0005524	intracellular|nucleotide binding|nucleoside binding|cytoplasm|intracellular membrane-bounded organelle|ribonucleoside binding|chloroplast|ATP binding	-	-	-	-	Chr01:18150745-18151356	51	64	106	19	22	35	9.13955	10.8031	18.0977	3.69242	3.55623	5.02542	12.6801	4.09135	1.63192	9.99134e-08	8.10249e-06	UP
Potri.005G248600	-	-	GO:0016020|GO:0005622|GO:0005737|GO:0043231|GO:0031966|GO:0005743|GO:0005739|GO:0005740|GO:0005747	membrane|intracellular|cytoplasm|intracellular membrane-bounded organelle|mitochondrial membrane|mitochondrial inner membrane|mitochondrion|mitochondrial envelope|mitochondrial respiratory chain complex I	-	-	-	-	Chr05:25188058-25188734	57	48	38	117	130	99	17.7097	14.0472	11.2479	39.4203	36.4323	24.6444	14.335	33.499	-1.22458	1.0311e-07	8.33906e-06	DOWN
Potri.013G142432	-	DNA-directed RNA polymerase family protein	GO:0003824|GO:0008152|GO:0044237|GO:0071704|GO:0009058|GO:0006807|GO:0016740|GO:0044238|GO:0016772|GO:0003676|GO:0006139|GO:0006725|GO:0016070|GO:0003677|GO:0016779|GO:0009059|GO:0006351|GO:0003899	catalytic activity|metabolic process|cellular metabolic process|organic substance metabolic process|biosynthetic process|nitrogen compound metabolic process|transferase activity|primary metabolic process|transferase activity, transferring phosphorus-containing groups|nucleic acid binding|nucleobase-containing compound metabolic process|cellular aromatic compound metabolic process|RNA metabolic pr…	-	-	-	-	Chr13:14877522-14878292	238	220	505	64	83	179	33.8557	29.4776	68.4393	9.87263	10.6498	20.4013	43.9242	13.6413	1.68704	1.19475e-07	9.53339e-06	UP
Potri.006G037801	-	-	-	-	-	-	-	-	Chr06:2629257-2629728	67	127	101	31	48	50	15.5684	27.7963	22.3588	7.81145	10.0604	9.30858	21.9078	9.06016	1.27384	1.28156e-07	1.00646e-05	UP
Potri.002G143100	-	Preprotein translocase Sec, Sec61-beta subunit protein	GO:0016020|GO:0005622|GO:0005789|GO:0005783|GO:0005737|GO:0006810|GO:0043231|GO:0015031|GO:0046907|GO:0005784|GO:0006886	membrane|intracellular|endoplasmic reticulum membrane|endoplasmic reticulum|cytoplasm|transport|intracellular membrane-bounded organelle|protein transport|intracellular transport|Sec61 translocon complex|intracellular protein transport	K09481	protein transport protein SEC61 subunit beta[-]	ko04141|ko04145|ko03060	Protein processing in endoplasmic reticulum|Phagosome|Protein export	Chr02:10636906-10637744	4	5	4	133	146	7	0.272156	0.320424	0.259266	9.81294	8.96003	0.38157	0.283949	6.38485	-4.49095	1.87712e-07	1.41105e-05	DOWN
Potri.001G436200	-	Di-glucose binding protein with Kinesin motor domain	GO:0003824|GO:0005622|GO:0005515|GO:0016787|GO:0007017|GO:0016817|GO:0000166|GO:0001882|GO:0005875|GO:0032549|GO:0016818|GO:0005871|GO:0015631|GO:0007018|GO:0008017|GO:0005856|GO:0016462|GO:0005524|GO:0003774|GO:0003777	catalytic activity|intracellular|protein binding|hydrolase activity|microtubule-based process|hydrolase activity, acting on acid anhydrides|nucleotide binding|nucleoside binding|microtubule associated complex|ribonucleoside binding|hydrolase activity, acting on acid anhydrides, in phosphorus-containing anhydrides|kinesin complex|tubulin binding|microtubule-based movement|microtubule binding|cytos…	-	-	-	-	Chr01:46763186-46769186	98	95	149	34	52	71	1.77246	1.61841	2.56742	0.666857	0.848325	1.02886	1.9861	0.848015	1.22778	1.98127e-07	1.47082e-05	UP
Potri.003G003500	-	-	-	-	-	-	-	-	Chr03:342785-345494	471	19	480	31	12	18	9.59989	0.364767	9.32064	0.68519	0.220616	0.293948	6.42844	0.399918	4.00669	2.38958e-07	1.74358e-05	UP
Potri.001G082332	-	-	-	-	-	-	-	-	Chr01:6499775-6500197	85	86	71	20	41	53	22.0388	21.003	17.5383	5.62329	9.58874	11.0101	20.1934	8.74072	1.20806	2.64721e-07	1.89906e-05	UP
Potri.008G164300	-	-	-	-	-	-	-	-	Chr08:11178733-11180183	8	8	8	0	0	0	1.17461	1.1064	1.11898	0	0	0	1.13333	0	Inf	2.78143e-07	1.97634e-05	UP
Potri.008G214500	-	Glutaredoxin family protein	GO:0003824|GO:0009055|GO:0016491|GO:0045454|GO:0015035	catalytic activity|electron carrier activity|oxidoreductase activity|cell redox homeostasis|protein disulfide oxidoreductase activity	-	-	-	-	Chr08:17157170-17157676	0	0	0	7	9	8	0	0	0	1.64204	1.75611	1.3866	0	1.59492	#NAME?	3.08621e-07	2.17735e-05	DOWN
Potri.008G113400	ATBZIP42,bZIP42	basic leucine-zipper 42	GO:0008152|GO:0044237|GO:0003700|GO:0071704|GO:0009058|GO:0006807|GO:0044238|GO:0003676|GO:0006139|GO:0006725|GO:0016070|GO:0003677|GO:0010468|GO:0009059|GO:0006351|GO:0043565|GO:0006355	metabolic process|cellular metabolic process|transcription factor activity, sequence-specific DNA binding|organic substance metabolic process|biosynthetic process|nitrogen compound metabolic process|primary metabolic process|nucleic acid binding|nucleobase-containing compound metabolic process|cellular aromatic compound metabolic process|RNA metabolic process|DNA binding|regulation of gene expres…	-	-	-	-	Chr08:7247396-7248053	35	45	55	71	101	134	5.83384	7.0649	8.73376	12.8335	15.185	17.8954	7.21084	15.3046	-1.08573	3.35133e-07	2.34224e-05	DOWN
Potri.003G218000	PSY	PHYTOENE SYNTHASE	GO:0003824|GO:0008152|GO:0009058|GO:0016740	catalytic activity|metabolic process|biosynthetic process|transferase activity	K02291	phytoene synthase[2.5.1.32]	ko01100|ko01100|ko01110|ko00906	Metabolic pathways|Metabolic pathways|Biosynthesis of secondary metabolites|Carotenoid biosynthesis	Chr03:21421950-21424246	10	7	11	34	32	30	0.710315	0.468319	0.744422	2.61905	2.05032	1.70738	0.641018	2.12558	-1.72942	3.43995e-07	2.39776e-05	DOWN
Potri.013G142601	-	ribosomal protein S2	GO:0005198|GO:0008152|GO:0044237|GO:0005622|GO:0071704|GO:0009058|GO:0003735|GO:0006807|GO:0044238|GO:0005737|GO:0019538|GO:0015935|GO:0005840|GO:0009059|GO:0006412|GO:0043043	structural molecule activity|metabolic process|cellular metabolic process|intracellular|organic substance metabolic process|biosynthetic process|structural constituent of ribosome|nitrogen compound metabolic process|primary metabolic process|cytoplasm|protein metabolic process|small ribosomal subunit|ribosome|macromolecule biosynthetic process|translation|peptide biosynthetic process	-	-	-	-	Chr13:14881679-14881918	181	199	349	51	61	156	82.7134	85.6578	151.943	25.2736	25.1441	57.118	106.772	35.8452	1.57467	3.70209e-07	2.52818e-05	UP
Potri.002G040200	-	nodulin MtN21 /EamA-like transporter family protein	GO:0005215|GO:0016020|GO:0022857|GO:0016021	transporter activity|membrane|transmembrane transporter activity|integral component of membrane	-	-	-	-	Chr02:2572466-2574248	0	3	2	7	18	34	0	0.282554	0.190491	0.758901	1.62324	2.72356	0.157682	1.7019	-3.43206	3.7281e-07	2.53362e-05	DOWN
Potri.019G047500	-	photosystem II reaction center protein C	GO:0008152|GO:0016020|GO:0044237|GO:0005622|GO:0022900|GO:0009579|GO:0055114|GO:0015979|GO:0009521|GO:0016168|GO:0009767|GO:0019684	metabolic process|membrane|cellular metabolic process|intracellular|electron transport chain|thylakoid|oxidation-reduction process|photosynthesis|photosystem|chlorophyll binding|photosynthetic electron transport chain|photosynthesis, light reaction	-	-	-	-	Chr19:6688729-6691334	79	85	200	14	11	54	11.9838	12.1452	28.9041	2.30294	1.50512	6.56321	17.6777	3.45709	2.3543	3.72176e-07	2.53362e-05	UP
Potri.002G131800	-	-	-	-	-	-	-	-	Chr02:9853837-9854194	8	12	15	0	1	3	2.45093	3.46292	4.378	0	0.276335	0.736422	3.43062	0.337585	3.34514	3.82855e-07	2.57661e-05	UP
Potri.006G169800	ATZFP2,ZFP2	zinc finger protein 2	-	-	-	-	-	-	Chr06:17626093-17626807	8	9	20	0	2	0	1.22718	1.30037	2.92281	0	0.276721	0	1.81678	0.0922403	4.29985	4.01973e-07	2.68369e-05	UP
Potri.007G008600	-	-	-	-	-	-	-	-	Chr07:676583-680113	51	66	60	48	630	727	1.58408	1.93095	1.7755	1.61678	17.6507	18.0924	1.76351	12.4533	-2.82	4.03171e-07	2.68568e-05	DOWN
Potri.013G141500	-	chloroplast ribosomal protein S4	GO:0005622|GO:0003676|GO:0003723|GO:0019843	intracellular|nucleic acid binding|RNA binding|rRNA binding	K02986	small subunit ribosomal protein S4[-]	ko03010	Ribosome	Chr13:14849394-14849797	70	77	180	25	29	50	20.8054	21.557	50.9699	8.05795	7.77481	11.9069	31.1108	9.24656	1.75043	4.58775e-07	3.00906e-05	UP
Potri.T003900	-	NB-ARC domain-containing disease resistance protein	GO:0005515|GO:0003676|GO:0000166|GO:0001882|GO:0003677|GO:0032549|GO:0043531	protein binding|nucleic acid binding|nucleotide binding|nucleoside binding|DNA binding|ribonucleoside binding|ADP binding	-	-	-	-	scaffold_20:680240-692307	27	31	30	8	10	13	0.245379	0.265364	0.259749	0.0788484	0.0819753	0.094661	0.256831	0.0851616	1.59254	5.05333e-07	3.27129e-05	UP
Potri.009G081900	-	-	-	-	-	-	-	-	Chr09:7766846-7774052	71	74	54	33	22	32	1.55584	1.52738	1.12735	0.784201	0.434847	0.561841	1.40353	0.59363	1.24142	5.1198e-07	3.30004e-05	UP
Potri.005G096600	ATMYB63,MYB63	myb domain protein 63	-	-	-	-	-	-	Chr05:7290267-7293210	21	33	20	58	51	80	1.64164	2.42986	1.48953	4.91683	3.59609	5.01065	1.85368	4.50786	-1.28205	5.44094e-07	3.46953e-05	DOWN
Potri.004G017700	CYP716A1	cytochrome P450, family 716, subfamily A, polypeptide 1	GO:0003824|GO:0008152|GO:0016491|GO:0016705|GO:0055114|GO:0043169|GO:0020037|GO:0046872|GO:0005506	catalytic activity|metabolic process|oxidoreductase activity|oxidoreductase activity, acting on paired donors, with incorporation or reduction of molecular oxygen|oxidation-reduction process|cation binding|heme binding|metal ion binding|iron ion binding	-	-	-	-	Chr04:1176455-1178313	105	110	119	41	44	87	7.3962	7.29841	7.98598	3.13188	2.79565	4.9101	7.56019	3.61254	1.06541	5.47403e-07	3.48319e-05	UP
Potri.005G038900	-	ATP binding microtubule motor family protein	GO:0003824|GO:0005622|GO:0005515|GO:0016787|GO:0007017|GO:0016817|GO:0000166|GO:0001882|GO:0005875|GO:0032549|GO:0016818|GO:0005871|GO:0015631|GO:0007018|GO:0008017|GO:0005856|GO:0016462|GO:0005524|GO:0003774|GO:0003777	catalytic activity|intracellular|protein binding|hydrolase activity|microtubule-based process|hydrolase activity, acting on acid anhydrides|nucleotide binding|nucleoside binding|microtubule associated complex|ribonucleoside binding|hydrolase activity, acting on acid anhydrides, in phosphorus-containing anhydrides|kinesin complex|tubulin binding|microtubule-based movement|microtubule binding|cytos…	-	-	-	-	Chr05:2837687-2842202	29	21	27	7	6	11	1.70904	1.1657	1.51592	0.447348	0.31895	0.519421	1.46356	0.428573	1.77187	7.71514e-07	4.69883e-05	UP
Potri.014G002900	-	LRR and NB-ARC domains-containing disease resistance protein	GO:0000166|GO:0001882|GO:0032549|GO:0043531	nucleotide binding|nucleoside binding|ribonucleoside binding|ADP binding	-	-	-	-	Chr14:362681-366469	42	54	59	17	29	21	1.21571	1.47228	1.62704	0.533608	0.757167	0.487034	1.43835	0.592603	1.27927	7.74439e-07	4.70704e-05	UP
Potri.T103100	-	Ycf1 protein	-	-	-	-	-	-	scaffold_149:61152-61778	40	46	102	16	21	18	6.99686	7.57912	16.998	3.03501	3.31337	2.5227	10.5247	2.95703	1.83156	7.96325e-07	4.82043e-05	UP
Potri.008G164466	AHL20	AT-hook motif nuclear-localized protein 20	-	-	-	-	-	-	Chr08:11203468-11205129	30	33	39	66	65	96	1.97973	2.0512	2.45191	4.72305	3.86902	5.07578	2.16094	4.55595	-1.07609	8.81343e-07	5.27093e-05	DOWN
Potri.006G131700	-	-	-	-	-	-	-	-	Chr06:10791403-10796351	52	52	85	17	15	38	2.47959	2.33561	3.86151	0.879061	0.645181	1.45182	2.89224	0.992022	1.54374	9.01199e-07	5.3789e-05	UP
Potri.013G139000	-	ribosomal protein S12C	GO:0005198|GO:0008152|GO:0044237|GO:0005622|GO:0071704|GO:0009058|GO:0003735|GO:0006807|GO:0044238|GO:0005737|GO:0019538|GO:0005840|GO:0009059|GO:0006412|GO:0043043	structural molecule activity|metabolic process|cellular metabolic process|intracellular|organic substance metabolic process|biosynthetic process|structural constituent of ribosome|nitrogen compound metabolic process|primary metabolic process|cytoplasm|protein metabolic process|ribosome|macromolecule biosynthetic process|translation|peptide biosynthetic process	-	-	-	-	Chr13:14755958-14756298	244	263	661	62	78	210	115.847	117.616	298.991	31.9221	33.4042	79.8854	177.485	48.4039	1.8745	9.10976e-07	5.41559e-05	UP
Potri.002G211800	-	-	-	-	-	-	-	-	Chr02:18388647-18389480	9	23	27	1	4	5	1.18355	2.84898	3.38266	0.142556	0.474474	0.526817	2.47173	0.381282	2.69659	9.63119e-07	5.68031e-05	UP
Potri.014G020100	-	Gibberellin-regulated family protein	-	-	-	-	-	-	Chr14:1815675-1816187	77	95	59	32	40	39	20.7494	24.1131	15.1471	9.3511	9.72263	8.42041	20.0032	9.16471	1.12607	9.99134e-07	5.88109e-05	UP
Potri.019G063700	-	ENTH/ANTH/VHS superfamily protein	GO:0008289|GO:0005543	lipid binding|phospholipid binding	-	-	-	-	Chr19:9647067-9648278	65	54	52	29	24	23	5.88189	4.6027	4.48302	2.84578	1.95897	1.66757	4.9892	2.15744	1.20949	1.02291e-06	5.99738e-05	UP
Potri.013G142700	-	ATP synthase subunit C family protein	GO:0005215|GO:0016020|GO:0022857|GO:0055085|GO:0033177|GO:0006810|GO:0034220|GO:0006811|GO:0006812|GO:0015992|GO:0015991|GO:0008324|GO:0015078	transporter activity|membrane|transmembrane transporter activity|transmembrane transport|proton-transporting two-sector ATPase complex, proton-transporting domain|transport|ion transmembrane transport|ion transport|cation transport|proton transport|ATP hydrolysis coupled proton transport|cation transmembrane transporter activity|hydrogen ion transmembrane transporter activity	-	-	-	-	Chr13:14882770-14884113	34	45	93	10	13	25	13.3657	16.662	34.8296	4.26282	4.60954	7.87392	21.6191	5.58209	1.95343	1.04449e-06	6.08805e-05	UP
Potri.019G028700	-	ribosomal protein S2	GO:0005198|GO:0008152|GO:0044237|GO:0005622|GO:0071704|GO:0009058|GO:0003735|GO:0006807|GO:0044238|GO:0005737|GO:0019538|GO:0015935|GO:0005840|GO:0009059|GO:0006412|GO:0043043	structural molecule activity|metabolic process|cellular metabolic process|intracellular|organic substance metabolic process|biosynthetic process|structural constituent of ribosome|nitrogen compound metabolic process|primary metabolic process|cytoplasm|protein metabolic process|small ribosomal subunit|ribosome|macromolecule biosynthetic process|translation|peptide biosynthetic process	K02967	small subunit ribosomal protein S2[-]	ko03010	Ribosome	Chr19:3204074-3204718	224	245	559	55	84	198	38.0889	39.2401	90.5567	10.1419	12.8836	26.9753	55.9619	16.6669	1.74746	1.2788e-06	7.32501e-05	UP
Potri.008G151100	ATSTP13,MSS1,STP13	Major facilitator superfamily protein	GO:0016020|GO:0016021|GO:0055085|GO:0006810	membrane|integral component of membrane|transmembrane transport|transport	-	-	-	-	Chr08:10217669-10222193	31	36	25	57	61	86	2.01181	2.20063	1.54566	4.01141	3.57077	4.47167	1.91936	4.01795	-1.06583	1.38567e-06	7.90678e-05	DOWN
Potri.006G040700	-	P-loop containing nucleoside triphosphate hydrolases superfamily protein	GO:0003824|GO:0005622|GO:0005515|GO:0016787|GO:0007017|GO:0016817|GO:0000166|GO:0001882|GO:0005875|GO:0032549|GO:0016818|GO:0005871|GO:0015631|GO:0007018|GO:0008017|GO:0005856|GO:0016462|GO:0005524|GO:0003774|GO:0003777	catalytic activity|intracellular|protein binding|hydrolase activity|microtubule-based process|hydrolase activity, acting on acid anhydrides|nucleotide binding|nucleoside binding|microtubule associated complex|ribonucleoside binding|hydrolase activity, acting on acid anhydrides, in phosphorus-containing anhydrides|kinesin complex|tubulin binding|microtubule-based movement|microtubule binding|cytos…	-	-	-	-	Chr06:2896455-2907351	133	122	184	63	60	105	3.47304	3.00077	4.57758	1.78402	1.41325	2.19685	3.68379	1.79804	1.03477	1.51419e-06	8.54216e-05	UP
Potri.010G195200	-	Protein of unknown function (DUF620)	-	-	-	-	-	-	Chr10:18895695-18898179	25	21	18	40	49	69	1.72884	1.36783	1.1859	2.99965	3.05641	3.82301	1.42752	3.29302	-1.2059	1.53484e-06	8.62603e-05	DOWN
Potri.013G138900	-	ribosomal protein S7	GO:0008152|GO:0044237|GO:0071704|GO:0009058|GO:0006807|GO:0044238|GO:0019538|GO:0009059|GO:0006412|GO:0043043	metabolic process|cellular metabolic process|organic substance metabolic process|biosynthetic process|nitrogen compound metabolic process|primary metabolic process|protein metabolic process|macromolecule biosynthetic process|translation|peptide biosynthetic process	K02992	small subunit ribosomal protein S7[-]	ko03010	Ribosome	Chr13:14754882-14755349	982	1006	2188	247	297	862	230.131	222.063	488.506	62.7714	62.7813	161.853	313.566	95.8021	1.71064	1.54214e-06	8.65078e-05	UP
Potri.015G131000	-	Ycf1 protein	-	-	-	-	-	-	Chr15:14197038-14197262	29	44	91	11	12	21	14.1357	20.2019	42.26	5.81491	5.27615	8.20166	25.5325	6.4309	1.98924	1.6336e-06	9.07573e-05	UP
Potri.012G006300	DMR6	2-oxoglutarate (2OG) and Fe(II)-dependent oxygenase superfamily protein	GO:0003824|GO:0008152|GO:0016491|GO:0055114	catalytic activity|metabolic process|oxidoreductase activity|oxidation-reduction process	-	-	-	-	Chr12:544007-551905	8	11	4	0	0	0	0.641397	0.830648	0.30551	0	0	0	0.592518	0	Inf	1.66855e-06	9.22124e-05	UP
Potri.007G127000	CPK24	calcium-dependent protein kinase 24	GO:0003824|GO:0008152|GO:0044237|GO:0071704|GO:0016740|GO:0044238|GO:0016772|GO:0019538|GO:0016301|GO:0006796|GO:0016773|GO:0006464|GO:0016310|GO:0004672|GO:0006468	catalytic activity|metabolic process|cellular metabolic process|organic substance metabolic process|transferase activity|primary metabolic process|transferase activity, transferring phosphorus-containing groups|protein metabolic process|kinase activity|phosphate-containing compound metabolic process|phosphotransferase activity, alcohol group as acceptor|cellular protein modification process|phosp…	K13412	calcium-dependent protein kinase[2.7.11.1]	ko04626	Plant-pathogen interaction	Chr07:14321250-14324857	32	38	24	14	8	8	1.32889	1.48641	0.949543	0.630454	0.299668	0.266189	1.25495	0.39877	1.654	1.74624e-06	9.57961e-05	UP
Potri.013G156500	-	Peroxidase superfamily protein	GO:0016209|GO:0003824|GO:0008152|GO:0016491|GO:0004601|GO:0006950|GO:0055114|GO:0006979|GO:0020037	antioxidant activity|catalytic activity|metabolic process|oxidoreductase activity|peroxidase activity|response to stress|oxidation-reduction process|response to oxidative stress|heme binding	K00430	peroxidase[1.11.1.7]	ko01100|ko01100|ko01110|ko00940	Metabolic pathways|Metabolic pathways|Biosynthesis of secondary metabolites|Phenylpropanoid biosynthesis	Chr13:15921082-15923633	83	90	101	38	62	38	8.05575	8.2279	9.33923	3.99958	5.42789	2.95504	8.54096	4.1275	1.04913	1.80143e-06	9.82818e-05	UP
Potri.019G057500	ATEXP8,ATEXPA8,ATHEXP ALPHA 1.11,EXP8,EXPA8	expansin A8	-	-	-	-	-	-	Chr19:8915815-8917527	33	47	37	16	10	20	3.38881	4.54624	3.61994	1.78179	0.92629	1.64556	3.85166	1.45121	1.40822	1.80653e-06	9.83802e-05	UP
Potri.T172237	-	Transducin/WD40 repeat-like superfamily protein	-	-	-	-	-	-	scaffold_584:18681-21258	55	55	64	18	31	37	11.9685	11.2733	13.2683	4.24776	6.08484	6.45115	12.17	5.59458	1.12123	1.82002e-06	9.89343e-05	UP
Potri.003G067301	-	DNA-directed RNA polymerase family protein	GO:0003824|GO:0008152|GO:0044237|GO:0071704|GO:0009058|GO:0006807|GO:0016740|GO:0044238|GO:0016772|GO:0003676|GO:0006139|GO:0006725|GO:0016070|GO:0003677|GO:0016779|GO:0009059|GO:0006351|GO:0003899	catalytic activity|metabolic process|cellular metabolic process|organic substance metabolic process|biosynthetic process|nitrogen compound metabolic process|transferase activity|primary metabolic process|transferase activity, transferring phosphorus-containing groups|nucleic acid binding|nucleobase-containing compound metabolic process|cellular aromatic compound metabolic process|RNA metabolic pr…	-	-	-	-	Chr03:9566251-9567033	92	95	202	27	45	74	12.8864	12.5339	26.9562	4.10128	5.6855	8.3048	17.4588	6.03053	1.5336	1.93223e-06	0.000104843	UP
Potri.013G138832	-	NADH-Ubiquinone/plastoquinone (complex I) protein	-	-	K05573	NAD(P)H-quinone oxidoreductase subunit 2[1.6.5.3]	ko01100|ko01100|ko00190	Metabolic pathways|Metabolic pathways|Oxidative phosphorylation	Chr13:14753634-14754182	100	93	240	38	40	74	19.9773	17.4998	45.6779	8.23228	7.20785	11.8446	27.7183	9.0949	1.60771	1.97619e-06	0.00010684	UP
Potri.002G209000	-	Thioredoxin superfamily protein	GO:0003824|GO:0009055|GO:0016491|GO:0045454|GO:0015035	catalytic activity|electron carrier activity|oxidoreductase activity|cell redox homeostasis|protein disulfide oxidoreductase activity	-	-	-	-	Chr02:17831936-17832362	19	25	19	39	54	56	4.8801	6.04828	4.64932	10.8628	12.5108	11.5244	5.19257	11.6327	-1.16366	2.29391e-06	0.00012181	DOWN
Potri.002G211100	-	ATP synthase subunit beta	GO:0003824|GO:0005215|GO:0016020|GO:0022857|GO:0016787|GO:0016817|GO:0033178|GO:0055085|GO:0006810|GO:0034220|GO:0016820|GO:0006811|GO:0006812|GO:0015992|GO:0015991	catalytic activity|transporter activity|membrane|transmembrane transporter activity|hydrolase activity|hydrolase activity, acting on acid anhydrides|proton-transporting two-sector ATPase complex, catalytic domain|transmembrane transport|transport|ion transmembrane transport|hydrolase activity, acting on acid anhydrides, catalyzing transmembrane movement of substances|ion transport|cation transpor…	-	-	-	-	Chr02:18302824-18303055	67	80	199	19	30	56	31.6736	35.6228	89.6257	9.74035	12.7924	21.2109	52.3073	14.5812	1.8429	2.38733e-06	0.000126545	UP
Potri.016G094200	-	photosynthetic electron transfer A	GO:0009055|GO:0008152|GO:0016020|GO:0044237|GO:0005622|GO:0016021|GO:0042651|GO:0009579|GO:0043169|GO:0015979|GO:0020037|GO:0031361|GO:0046872|GO:0005506	electron carrier activity|metabolic process|membrane|cellular metabolic process|intracellular|integral component of membrane|thylakoid membrane|thylakoid|cation binding|photosynthesis|heme binding|integral component of thylakoid membrane|metal ion binding|iron ion binding	K02634	apocytochrome f[-]	ko01100|ko01100|ko00195	Metabolic pathways|Metabolic pathways|Photosynthesis	Chr16:8218191-8219153	307	399	959	70	83	294	34.964	42.8026	104.054	8.6453	8.52648	26.8275	60.607	14.6664	2.04697	2.91453e-06	0.000151004	UP
Potri.T058600	-	photosynthetic electron transfer A	GO:0009055|GO:0008152|GO:0016020|GO:0044237|GO:0005622|GO:0016021|GO:0042651|GO:0009579|GO:0043169|GO:0015979|GO:0020037|GO:0031361|GO:0046872|GO:0005506	electron carrier activity|metabolic process|membrane|cellular metabolic process|intracellular|integral component of membrane|thylakoid membrane|thylakoid|cation binding|photosynthesis|heme binding|integral component of thylakoid membrane|metal ion binding|iron ion binding	-	-	-	-	scaffold_56:81246-82088	192	181	492	49	38	153	24.9794	22.1807	60.9826	6.91326	4.45938	15.9486	36.0475	9.10709	1.98484	2.96435e-06	0.000153319	UP
Potri.008G210600	-	-	-	-	-	-	-	-	Chr08:16260205-16261138	53	58	43	26	21	23	6.19044	6.38095	4.78488	3.29316	2.21244	2.1524	5.78542	2.55266	1.18042	3.14891e-06	0.000161466	UP
Potri.010G032700	-	photosystem II reaction center protein C	GO:0008152|GO:0016020|GO:0044237|GO:0005622|GO:0022900|GO:0009579|GO:0055114|GO:0015979|GO:0009521|GO:0016168|GO:0009767|GO:0019684	metabolic process|membrane|cellular metabolic process|intracellular|electron transport chain|thylakoid|oxidation-reduction process|photosynthesis|photosystem|chlorophyll binding|photosynthetic electron transport chain|photosynthesis, light reaction	K02705	photosystem II CP43 chlorophyll apoprotein[-]	ko01100|ko01100|ko00195	Metabolic pathways|Metabolic pathways|Photosynthesis	Chr10:5229730-5230131	146	151	441	34	45	126	39.8322	38.804	114.625	10.0592	11.074	27.5426	64.4206	16.2253	1.98928	3.38871e-06	0.000172871	UP
Potri.T145600	ACA10,ATACA10,CIF1	autoinhibited Ca(2+)-ATPase 10	GO:0005515|GO:0005516|GO:0000166|GO:0043169|GO:0046872	protein binding|calmodulin binding|nucleotide binding|cation binding|metal ion binding	-	-	-	-	scaffold_447:104-10964	6	8	6	0	0	0	0.421531	0.529458	0.401605	0	0	0	0.450865	0	Inf	4.09584e-06	0.000202371	UP
Potri.T118300	-	NB-ARC domain-containing disease resistance protein	GO:0000166|GO:0001882|GO:0032549|GO:0043531	nucleotide binding|nucleoside binding|ribonucleoside binding|ADP binding	-	-	-	-	scaffold_190:42464-54461	82	102	108	15	63	24	1.4282	1.67336	1.79209	0.283319	0.989749	0.334923	1.63121	0.535997	1.60565	4.22718e-06	0.000206806	UP
Potri.012G137550	-	GDSL-like Lipase/Acylhydrolase superfamily protein	GO:0003824|GO:0016787|GO:0016788	catalytic activity|hydrolase activity|hydrolase activity, acting on ester bonds	-	-	-	-	Chr12:15271721-15272934	2	0	0	39	31	3	0.241248	0	0	5.10276	3.37377	0.290032	0.0804159	2.92219	-5.18343	4.24123e-06	0.000207154	DOWN
Potri.017G094700	-	HXXXD-type acyl-transferase family protein	GO:0003824|GO:0016740|GO:0016746|GO:0016747	catalytic activity|transferase activity|transferase activity, transferring acyl groups|transferase activity, transferring acyl groups other than amino-acyl groups	-	-	-	-	Chr17:11165413-11166834	46	52	35	20	20	17	3.54785	3.77771	2.57182	1.67275	1.39139	1.05051	3.29913	1.37155	1.26628	4.40534e-06	0.00021377	UP
Potri.004G044300	-	Protein of unknown function (DUF506)	-	-	-	-	-	-	Chr04:3363903-3365101	10	12	7	19	35	37	1.12369	1.27021	0.749436	2.31533	3.54761	3.33133	1.04778	3.06476	-1.54844	4.48012e-06	0.000217046	DOWN
Potri.010G033600	-	-	-	-	-	-	-	-	Chr10:5747967-5748496	12	26	57	5	4	8	2.4833	5.06772	11.2373	1.12213	0.746625	1.32642	6.26278	1.06506	2.55587	4.51249e-06	0.00021826	UP
Potri.009G061500	AtMYB83,MYB83	myb domain protein 83	-	-	-	-	-	-	Chr09:6340254-6342421	0	3	0	8	12	11	0	0.292417	0	0.897682	1.11994	0.911927	0.0974722	0.976515	-3.32458	4.85589e-06	0.000232981	DOWN
Potri.014G037900	CYP82C4	cytochrome P450, family 82, subfamily C, polypeptide 4	GO:0003824|GO:0008152|GO:0016491|GO:0016705|GO:0055114|GO:0043169|GO:0020037|GO:0046872|GO:0005506	catalytic activity|metabolic process|oxidoreductase activity|oxidoreductase activity, acting on paired donors, with incorporation or reduction of molecular oxygen|oxidation-reduction process|cation binding|heme binding|metal ion binding|iron ion binding	-	-	-	-	Chr14:3099746-3101478	5	9	7	18	28	26	0.347505	0.589205	0.46353	1.3567	1.75537	1.44787	0.466746	1.51998	-1.70334	5.35172e-06	0.000252278	DOWN
Potri.002G131900	-	-	-	-	-	-	-	-	Chr02:9855442-9856018	8	8	11	0	0	3	1.81663	1.71115	2.37968	0	0	0.545836	1.96915	0.181945	3.436	5.56084e-06	0.0002593	UP
Potri.005G002100	RCI2A	Low temperature and salt responsive protein family	GO:0016020|GO:0016021	membrane|integral component of membrane	-	-	-	-	Chr05:125569-125948	21	28	17	44	51	56	9.1762	11.5242	7.07687	20.8492	20.1009	19.6053	9.25909	20.1851	-1.12435	5.9553e-06	0.000275115	DOWN
Potri.017G063100	-	DNA-directed RNA polymerase family protein	-	-	-	-	-	-	Chr17:5940893-5941101	61	73	147	15	15	54	32.0102	36.0827	73.4921	8.53616	7.10008	22.7043	47.195	12.7802	1.88473	6.1247e-06	0.000282067	UP
Potri.004G192200	-	structural constituent of ribosome	-	-	-	-	-	-	Chr04:20655154-20655612	28	34	54	9	0	17	7.69645	8.80295	14.1413	2.68279	0	3.74391	10.2136	2.14224	2.2533	6.38023e-06	0.000293383	UP
Potri.011G097400	-	-	-	-	-	-	-	-	Chr11:11844077-11846328	19	18	18	7	3	5	0.925313	0.825724	0.835185	0.369678	0.131787	0.1951	0.862074	0.232188	1.89252	6.46956e-06	0.000296576	UP
Potri.003G066300	-	Protein kinase superfamily protein	GO:0003824|GO:0008152|GO:0044237|GO:0071704|GO:0016740|GO:0044238|GO:0016772|GO:0019538|GO:0016301|GO:0006796|GO:0016773|GO:0006464|GO:0016310|GO:0004672|GO:0006468	catalytic activity|metabolic process|cellular metabolic process|organic substance metabolic process|transferase activity|primary metabolic process|transferase activity, transferring phosphorus-containing groups|protein metabolic process|kinase activity|phosphate-containing compound metabolic process|phosphotransferase activity, alcohol group as acceptor|cellular protein modification process|phosp…	K04733	interleukin-1 receptor-associated kinase 4[2.7.11.1]	ko04064|ko04624	NF-kappa B signaling pathway|Toll and Imd signaling pathway	Chr03:9453430-9455611	37	26	23	47	65	79	2.24321	1.48474	1.32847	3.09008	3.55462	3.83749	1.68547	3.49406	-1.05175	6.49799e-06	0.000297422	DOWN
Potri.003G119100	ANS,LDOX,TDS4,TT18	leucoanthocyanidin dioxygenase	GO:0003824|GO:0008152|GO:0016491|GO:0055114	catalytic activity|metabolic process|oxidoreductase activity|oxidation-reduction process	K05277	leucoanthocyanidin dioxygenase[1.14.11.19]	ko01100|ko01100|ko01110|ko00941	Metabolic pathways|Metabolic pathways|Biosynthesis of secondary metabolites|Flavonoid biosynthesis	Chr03:14189966-14191428	5	11	8	1	0	0	0.463536	0.960546	0.706572	0.1005	0	0	0.710218	0.0335	4.40603	6.54349e-06	0.000299046	UP
Potri.012G062601	-	ribulose-bisphosphate carboxylases	GO:0043169|GO:0046872|GO:0000287	cation binding|metal ion binding|magnesium ion binding	K01601	ribulose-bisphosphate carboxylase large chain[4.1.1.39]	ko01100|ko01100|ko01120|ko01200|ko00630|ko00710	Metabolic pathways|Metabolic pathways|Microbial metabolism in diverse environments|Carbon metabolism|Glyoxylate and dicarboxylate metabolism|Carbon fixation in photosynthetic organisms	Chr12:7087527-7087933	271	322	638	97	132	281	73.027	81.7307	163.793	28.3458	32.0847	60.6697	106.183	40.3667	1.39532	6.58553e-06	0.000300508	UP
Potri.T131500	ATPRB1,PRB1	basic pathogenesis-related protein 1	-	-	K13449	pathogenesis-related protein 1[-]	ko04075|ko04626|ko04016	Plant hormone signal transduction|Plant-pathogen interaction|MAPK signaling pathway - plant	scaffold_252:58482-59762	20	14	37	6	6	4	1.7123	1.12903	3.01803	0.557083	0.463362	0.274358	1.95312	0.431601	2.17801	6.79719e-06	0.00030875	UP
Potri.014G123100	EIF4B1	eukaryotic translation initiation factor 4B1	-	-	-	-	-	-	Chr14:9520508-9521887	19	22	17	5	6	7	1.88409	2.05495	1.60605	0.537732	0.536679	0.55614	1.84836	0.543517	1.76585	6.90667e-06	0.00031277	UP
Potri.008G152100	-	Sec14p-like phosphatidylinositol transfer family protein	-	-	-	-	-	-	Chr08:10324836-10328070	25	32	26	7	9	16	1.87419	2.25962	1.85695	0.569046	0.608578	0.961044	1.99692	0.71289	1.48602	7.12584e-06	0.000322207	UP
Potri.018G002600	-	Leucine-rich repeat protein kinase family protein	GO:0003824|GO:0008152|GO:0044237|GO:0005515|GO:0071704|GO:0016740|GO:0044238|GO:0016772|GO:0000166|GO:0001882|GO:0019538|GO:0016301|GO:0032549|GO:0006796|GO:0016773|GO:0006464|GO:0016310|GO:0005524|GO:0004672|GO:0006468	catalytic activity|metabolic process|cellular metabolic process|protein binding|organic substance metabolic process|transferase activity|primary metabolic process|transferase activity, transferring phosphorus-containing groups|nucleotide binding|nucleoside binding|protein metabolic process|kinase activity|ribonucleoside binding|phosphate-containing compound metabolic process|phosphotransferase ac…	-	-	-	-	Chr18:174610-177039	6	7	6	0	0	0	0.34325	0.377196	0.327024	0	0	0	0.349157	0	Inf	7.34666e-06	0.00033019	UP
Potri.T058500	RIC4	ROP-interactive CRIB motif-containing protein 4	-	-	-	-	-	-	scaffold_53:238417-239438	28	21	34	66	59	63	4.73172	3.34264	5.47394	12.0951	8.99343	8.53008	4.5161	9.87287	-1.12839	7.4041e-06	0.000332272	DOWN
Potri.008G202000	DVL14,RTFL14	ROTUNDIFOLIA like 14	-	-	-	-	-	-	Chr08:14249922-14250059	11	11	8	34	34	25	8.74183	8.23425	6.05706	29.303	24.3735	15.919	7.67771	23.1985	-1.59528	7.50507e-06	0.000335793	DOWN
Potri.003G190300	-	Mitochondrial transcription termination factor family protein	GO:0008152|GO:0044237|GO:0005622|GO:0071704|GO:0009058|GO:0006807|GO:0044238|GO:0003676|GO:0006139|GO:0005737|GO:0006725|GO:0043231|GO:0016070|GO:0003677|GO:0005739|GO:0010468|GO:0009059|GO:0006351|GO:0006355|GO:0003690	metabolic process|cellular metabolic process|intracellular|organic substance metabolic process|biosynthetic process|nitrogen compound metabolic process|primary metabolic process|nucleic acid binding|nucleobase-containing compound metabolic process|cytoplasm|cellular aromatic compound metabolic process|intracellular membrane-bounded organelle|RNA metabolic process|DNA binding|mitochondrion|regulat…	-	-	-	-	Chr03:19503074-19504222	6	11	7	33	31	21	0.572681	0.98897	0.636597	3.41595	2.66907	1.60607	0.732749	2.5637	-1.80683	7.96147e-06	0.000351471	DOWN
Potri.004G088700	DegP7	DegP protease 7	-	-	-	-	-	-	Chr04:7477358-7489705	46	52	50	27	23	17	1.45432	1.54855	1.50604	0.925714	0.655906	0.43062	1.50297	0.670747	1.16398	8.19345e-06	0.000360645	UP
Potri.011G074500	-	ribosomal protein S12B	GO:0005198|GO:0008152|GO:0044237|GO:0005622|GO:0071704|GO:0009058|GO:0003735|GO:0006807|GO:0044238|GO:0005737|GO:0019538|GO:0005840|GO:0009059|GO:0006412|GO:0043043	structural molecule activity|metabolic process|cellular metabolic process|intracellular|organic substance metabolic process|biosynthetic process|structural constituent of ribosome|nitrogen compound metabolic process|primary metabolic process|cytoplasm|protein metabolic process|ribosome|macromolecule biosynthetic process|translation|peptide biosynthetic process	K02950	small subunit ribosomal protein S12[-]	ko03010	Ribosome	Chr11:7202409-7202750	107	115	268	36	37	99	38.3506	38.824	91.5127	13.9926	11.9619	28.4297	56.2291	18.1281	1.63309	8.71207e-06	0.000381783	UP
Potri.007G007900	ATMYB84,MYB84,RAX3	myb domain protein 84	-	-	-	-	-	-	Chr07:599459-601016	26	25	25	55	43	87	1.88972	1.71147	1.73106	4.33499	2.81901	5.06629	1.77742	4.07343	-1.19646	8.94154e-06	0.000389551	DOWN
Potri.005G118000	AP3,ATAP3	K-box region and MADS-box transcription factor family protein	GO:0008152|GO:0044237|GO:0005622|GO:0003700|GO:0005515|GO:0071704|GO:0009058|GO:0006807|GO:0044238|GO:0003676|GO:0006139|GO:0006725|GO:0043231|GO:0046983|GO:0016070|GO:0003677|GO:0010468|GO:0005634|GO:0009059|GO:0006351|GO:0006355	metabolic process|cellular metabolic process|intracellular|transcription factor activity, sequence-specific DNA binding|protein binding|organic substance metabolic process|biosynthetic process|nitrogen compound metabolic process|primary metabolic process|nucleic acid binding|nucleobase-containing compound metabolic process|cellular aromatic compound metabolic process|intracellular membrane-bounde…	-	-	-	-	Chr05:9124153-9125909	28	23	23	40	58	64	3.48964	2.70006	2.73091	5.40618	6.52024	6.39083	2.97354	6.10575	-1.03799	9.34712e-06	0.000404857	DOWN
Potri.T073300	-	nodulin MtN21 /EamA-like transporter family protein	GO:0005215|GO:0016020|GO:0022857|GO:0016021	transporter activity|membrane|transmembrane transporter activity|integral component of membrane	-	-	-	-	scaffold_79:136869-138712	8	4	6	18	19	28	1.10927	0.52243	0.792549	2.70653	2.37627	3.11057	0.808082	2.73113	-1.75692	9.45101e-06	0.000407582	DOWN
Potri.003G200600	-	-	-	-	-	-	-	-	Chr03:20295003-20302361	31	44	55	15	23	14	1.07457	1.43661	1.81631	0.563861	0.719133	0.388837	1.4425	0.557277	1.3721	9.47977e-06	0.000408232	UP
Potri.008G061800	-	Bifunctional inhibitor/lipid-transfer protein/seed storage 2S albumin superfamily protein	-	-	-	-	-	-	Chr08:3716175-3716768	3	7	2	23	19	14	0.650333	1.42902	0.412981	5.40605	3.71468	2.43139	0.830778	3.85071	-2.21259	9.72335e-06	0.000416916	DOWN
Potri.001G118800	AtMYB42,MYB42	myb domain protein 42	-	-	-	-	-	-	Chr01:9532703-9534455	28	35	24	51	75	62	2.8593	3.36654	2.33496	5.64773	6.90836	5.07282	2.8536	5.8763	-1.04213	9.76959e-06	0.000418298	DOWN
Potri.T172036	ATNRPD1B,DMS5,DRD3,NRPD1B,NRPE1	nuclear RNA polymerase D1B	GO:0003824|GO:0008152|GO:0044237|GO:0071704|GO:0009058|GO:0006807|GO:0016740|GO:0044238|GO:0016772|GO:0003676|GO:0006139|GO:0006725|GO:0016070|GO:0003677|GO:0016779|GO:0009059|GO:0006351|GO:0003899	catalytic activity|metabolic process|cellular metabolic process|organic substance metabolic process|biosynthetic process|nitrogen compound metabolic process|transferase activity|primary metabolic process|transferase activity, transferring phosphorus-containing groups|nucleic acid binding|nucleobase-containing compound metabolic process|cellular aromatic compound metabolic process|RNA metabolic pr…	-	-	-	-	scaffold_500:12919-21068	5	4	13	0	0	0	0.19487	0.146852	0.482714	0	0	0	0.274812	0	Inf	1.01992e-05	0.000434202	UP
Potri.019G120000	-	S-locus lectin protein kinase family protein	GO:0003824|GO:0008152|GO:0044237|GO:0071704|GO:0016740|GO:0044238|GO:0016772|GO:0048544|GO:0019538|GO:0016301|GO:0006796|GO:0016773|GO:0006464|GO:0016310|GO:0004672|GO:0006468	catalytic activity|metabolic process|cellular metabolic process|organic substance metabolic process|transferase activity|primary metabolic process|transferase activity, transferring phosphorus-containing groups|recognition of pollen|protein metabolic process|kinase activity|phosphate-containing compound metabolic process|phosphotransferase activity, alcohol group as acceptor|cellular protein modi…	-	-	-	-	Chr19:14750475-14755280	31	30	18	6	6	15	0.952101	0.867862	0.526698	0.199838	0.166219	0.369111	0.78222	0.245056	1.67446	1.0226e-05	0.00043472	UP
Potri.014G115000	XET,XTH33	xyloglucan:xyloglucosyl transferase 33	GO:0003824|GO:0008152|GO:0005576|GO:0044237|GO:0048046|GO:0071704|GO:0016740|GO:0016787|GO:0044238|GO:0005975|GO:0016757|GO:0016798|GO:0005618|GO:0004553|GO:0016758|GO:0016762|GO:0006073	catalytic activity|metabolic process|extracellular region|cellular metabolic process|apoplast|organic substance metabolic process|transferase activity|hydrolase activity|primary metabolic process|carbohydrate metabolic process|transferase activity, transferring glycosyl groups|hydrolase activity, acting on glycosyl bonds|cell wall|hydrolase activity, hydrolyzing O-glycosyl compounds|transferase a…	-	-	-	-	Chr14:8968037-8969555	78	95	64	37	33	55	7.37469	8.46039	5.76486	3.79365	2.81432	4.16648	7.19998	3.59148	1.00341	1.03378e-05	0.000437605	UP
Potri.007G134500	ATMYB52,BW52,MYB52	myb domain protein 52	-	-	-	-	-	-	Chr07:14767729-14769446	3	6	2	10	30	18	0.286645	0.539898	0.182028	1.036	2.58522	1.37782	0.336191	1.66635	-2.30934	1.0665e-05	0.00044782	DOWN
Potri.008G000500	GCN2	protein kinase family protein	GO:0003824|GO:0008152|GO:0044237|GO:0071704|GO:0016740|GO:0044238|GO:0016772|GO:0000166|GO:0001882|GO:0019538|GO:0016301|GO:0032549|GO:0006796|GO:0016773|GO:0006464|GO:0016310|GO:0005524|GO:0004672|GO:0006468	catalytic activity|metabolic process|cellular metabolic process|organic substance metabolic process|transferase activity|primary metabolic process|transferase activity, transferring phosphorus-containing groups|nucleotide binding|nucleoside binding|protein metabolic process|kinase activity|ribonucleoside binding|phosphate-containing compound metabolic process|phosphotransferase activity, alcohol …	K16195	eukaryotic translation initiation factor 2-alpha kinase 2[2.7.11.1]	ko04141|ko05165|ko04217|ko05167	Protein processing in endoplasmic reticulum|Human papillomavirus infection|Necroptosis|Kaposi's sarcoma-associated herpesvirus infection	Chr08:13503-16773	44	82	60	24	27	37	0.913102	1.60285	1.18624	0.540112	0.505402	0.615209	1.23406	0.553574	1.15657	1.06692e-05	0.00044782	UP
Potri.T003800	-	NB-ARC domain-containing disease resistance protein	GO:0005515|GO:0000166|GO:0001882|GO:0032549|GO:0005524	protein binding|nucleotide binding|nucleoside binding|ribonucleoside binding|ATP binding	-	-	-	-	scaffold_20:665671-678187	100	100	204	54	57	76	0.876209	0.825324	1.70293	0.5131	0.450498	0.533545	1.13482	0.499048	1.18522	1.07072e-05	0.000448785	UP
Potri.005G124200	-	Sulfite exporter TauE/SafE family protein	GO:0016020|GO:0016021	membrane|integral component of membrane	-	-	-	-	Chr05:9698739-9702773	45	65	75	22	32	38	2.84789	3.87473	4.522	1.50985	1.82671	1.92683	3.74821	1.75446	1.09517	1.12009e-05	0.000467669	UP
Potri.004G034000	-	Dynein light chain type 1 family protein	GO:0005622|GO:0007017|GO:0005875|GO:0005856	intracellular|microtubule-based process|microtubule associated complex|cytoskeleton	-	-	-	-	Chr04:2487794-2488939	16	17	16	37	52	35	1.64931	1.65061	1.57131	4.13593	4.83482	2.89056	1.62374	3.95377	-1.28391	1.25228e-05	0.00051188	DOWN
Potri.005G027300	-	-	-	-	-	-	-	-	Chr05:1996628-2001842	60	60	75	28	26	48	1.38712	1.30658	1.6519	0.70198	0.542184	0.889107	1.44853	0.711091	1.02649	1.33255e-05	0.000539584	UP
Potri.016G137900	ATWRKY70,WRKY70	WRKY DNA-binding protein 70	GO:0008152|GO:0044237|GO:0003700|GO:0071704|GO:0009058|GO:0006807|GO:0044238|GO:0003676|GO:0006139|GO:0006725|GO:0016070|GO:0003677|GO:0010468|GO:0009059|GO:0006351|GO:0043565|GO:0006355	metabolic process|cellular metabolic process|transcription factor activity, sequence-specific DNA binding|organic substance metabolic process|biosynthetic process|nitrogen compound metabolic process|primary metabolic process|nucleic acid binding|nucleobase-containing compound metabolic process|cellular aromatic compound metabolic process|RNA metabolic process|DNA binding|regulation of gene expres…	-	-	-	-	Chr16:14049646-14051741	48	54	25	15	18	15	4.59778	4.87203	2.28137	1.55813	1.5552	1.15117	3.91706	1.4215	1.46236	1.33871e-05	0.000541343	UP
Potri.019G095400	-	Protein of unknown function (DUF1421)	-	-	-	-	-	-	Chr19:12619240-12623881	52	37	69	14	29	25	2.50134	1.67647	3.16216	0.730276	1.25829	0.96352	2.44665	0.984029	1.31404	1.37328e-05	0.000553074	UP
Potri.010G110400	CRR23	inorganic carbon transport protein-related	GO:0003824|GO:0008152|GO:0016491|GO:0016651|GO:0055114|GO:0016655	catalytic activity|metabolic process|oxidoreductase activity|oxidoreductase activity, acting on NAD(P)H|oxidation-reduction process|oxidoreductase activity, acting on NAD(P)H, quinone or similar compound as acceptor	-	-	-	-	Chr10:12934951-12936238	7	11	16	2	2	1	0.617687	0.91418	1.34503	0.191408	0.159176	0.0707263	0.958965	0.140437	2.77156	1.44725e-05	0.000578958	UP
Potri.013G142366	-	DNA-directed RNA polymerase family protein	GO:0003824|GO:0008152|GO:0044237|GO:0071704|GO:0009058|GO:0006807|GO:0016740|GO:0044238|GO:0016772|GO:0003676|GO:0006139|GO:0006725|GO:0016070|GO:0003677|GO:0016779|GO:0009059|GO:0006351|GO:0003899	catalytic activity|metabolic process|cellular metabolic process|organic substance metabolic process|biosynthetic process|nitrogen compound metabolic process|transferase activity|primary metabolic process|transferase activity, transferring phosphorus-containing groups|nucleic acid binding|nucleobase-containing compound metabolic process|cellular aromatic compound metabolic process|RNA metabolic pr…	-	-	-	-	Chr13:14875570-14876088	264	255	606	75	70	246	55.7885	50.757	122.004	17.1872	13.3429	41.6512	76.1831	24.0604	1.66281	1.46857e-05	0.000586702	UP
Potri.014G014500	-	Uncharacterised conserved protein UCP031279	-	-	-	-	-	-	Chr14:1438106-1438936	2	10	3	25	14	27	0.263892	1.24314	0.377272	3.57808	1.66665	2.85506	0.6281	2.69993	-2.10386	1.47223e-05	0.000587121	DOWN
Potri.010G077300	NRPE7	RNA polymerase Rpb7-like, N-terminal domain	GO:0003824|GO:0008152|GO:0044237|GO:0071704|GO:0009058|GO:0006807|GO:0016740|GO:0044238|GO:0016772|GO:0006139|GO:0006725|GO:0016070|GO:0016779|GO:0009059|GO:0006351|GO:0003899	catalytic activity|metabolic process|cellular metabolic process|organic substance metabolic process|biosynthetic process|nitrogen compound metabolic process|transferase activity|primary metabolic process|transferase activity, transferring phosphorus-containing groups|nucleobase-containing compound metabolic process|cellular aromatic compound metabolic process|RNA metabolic process|nucleotidyltran…	-	-	-	-	Chr10:10289938-10292830	27	173	180	32	27	34	0.514998	3.10815	3.27094	0.661895	0.46453	0.519607	2.29803	0.548678	2.06637	1.50331e-05	0.000596585	UP
Potri.013G080400	-	Phosphorylase superfamily protein	GO:0003824|GO:0008152|GO:0044237|GO:0071704|GO:0006807|GO:0044238|GO:0006139|GO:0006725|GO:0009116	catalytic activity|metabolic process|cellular metabolic process|organic substance metabolic process|nitrogen compound metabolic process|primary metabolic process|nucleobase-containing compound metabolic process|cellular aromatic compound metabolic process|nucleoside metabolic process	-	-	-	-	Chr13:7031761-7033553	0	2	3	10	18	9	0	0.208017	0.315723	1.19771	1.79325	0.796392	0.17458	1.26245	-2.85427	1.51399e-05	0.000600027	DOWN
Potri.001G115066	ARK3,PAK	armadillo repeat kinesin 3	GO:0003824|GO:0005622|GO:0005515|GO:0016787|GO:0007017|GO:0016817|GO:0000166|GO:0001882|GO:0005875|GO:0032549|GO:0016818|GO:0005871|GO:0015631|GO:0007018|GO:0008017|GO:0005856|GO:0016462|GO:0005524|GO:0003774|GO:0003777	catalytic activity|intracellular|protein binding|hydrolase activity|microtubule-based process|hydrolase activity, acting on acid anhydrides|nucleotide binding|nucleoside binding|microtubule associated complex|ribonucleoside binding|hydrolase activity, acting on acid anhydrides, in phosphorus-containing anhydrides|kinesin complex|tubulin binding|microtubule-based movement|microtubule binding|cytos…	-	-	-	-	Chr01:9193167-9195321	62	62	93	29	44	37	5.86199	5.52151	8.37712	2.97335	3.75243	2.80291	6.58687	3.17623	1.05228	1.53286e-05	0.000606699	UP
Potri.003G138800	-	PA-domain containing subtilase family protein	-	-	-	-	-	-	Chr03:15670062-15670625	0	0	0	4	8	6	0	0	0	1.35528	2.25476	1.50222	0	1.70409	#NAME?	1.718e-05	0.000664985	DOWN
Potri.011G055900	SPL3	squamosa promoter binding protein-like 3	GO:0005622|GO:0003676|GO:0043231|GO:0003677|GO:0005634	intracellular|nucleic acid binding|intracellular membrane-bounded organelle|DNA binding|nucleus	-	-	-	-	Chr11:4906262-4910124	34	41	37	10	19	24	6.3311	7.19114	6.56384	2.01923	3.19122	3.58067	6.69536	2.93037	1.19208	1.83718e-05	0.00070201	UP
Potri.010G024500	ATFPF1,FPF1	flowering promoting factor 1	-	-	-	-	-	-	Chr10:3485943-3486343	16	16	15	4	7	1	4.37622	4.12182	3.90854	1.18629	1.72692	0.219234	4.13552	1.04415	1.98574	1.89924e-05	0.000722946	UP
Potri.005G154500	-	photosystem II reaction center protein K precursor	GO:0008152|GO:0016020|GO:0044237|GO:0005622|GO:0009579|GO:0015979|GO:0009521|GO:0009539|GO:0009523	metabolic process|membrane|cellular metabolic process|intracellular|thylakoid|photosynthesis|photosystem|photosystem II reaction center|photosystem II	K02712	photosystem II PsbK protein[-]	ko01100|ko01100|ko00195	Metabolic pathways|Metabolic pathways|Photosynthesis	Chr05:14818203-14819201	176	195	402	59	70	182	19.3222	20.1648	42.0464	7.02423	6.93187	16.0091	27.1778	9.98839	1.4441	1.9437e-05	0.000736114	UP
Potri.013G101000	-	Phosphorylase superfamily protein	GO:0003824|GO:0008152|GO:0044237|GO:0071704|GO:0006807|GO:0044238|GO:0006139|GO:0006725|GO:0009116	catalytic activity|metabolic process|cellular metabolic process|organic substance metabolic process|nitrogen compound metabolic process|primary metabolic process|nucleobase-containing compound metabolic process|cellular aromatic compound metabolic process|nucleoside metabolic process	-	-	-	-	Chr13:11347436-11349338	19	17	27	44	48	50	1.76594	1.48835	2.39079	4.43487	4.02418	3.72343	1.88169	4.06083	-1.10974	1.95922e-05	0.000741051	DOWN
Potri.003G011600	-	cytochrome oxidase	GO:0003824|GO:0005215|GO:0009055|GO:0008152|GO:0016020|GO:0044237|GO:0016491|GO:0022857|GO:0004129|GO:0016021|GO:0055114|GO:0043169|GO:0020037|GO:0046872|GO:0008324|GO:0009060|GO:0005506|GO:0015078	catalytic activity|transporter activity|electron carrier activity|metabolic process|membrane|cellular metabolic process|oxidoreductase activity|transmembrane transporter activity|cytochrome-c oxidase activity|integral component of membrane|oxidation-reduction process|cation binding|heme binding|metal ion binding|cation transmembrane transporter activity|aerobic respiration|iron ion binding|hydrog…	K02256	cytochrome c oxidase subunit 1[1.9.3.1]	ko01100|ko01100|ko00190	Metabolic pathways|Metabolic pathways|Oxidative phosphorylation	Chr03:1292084-1293183	23	19	0	0	0	0	4.94612	3.84865	0	0	0	0	2.93159	0	Inf	2.08169e-05	0.000781431	UP
Potri.013G138700	-	Chloroplast Ycf2;ATPase, AAA type, core	-	-	-	-	-	-	Chr13:14750413-14750637	9	14	29	2	2	6	4.38702	6.42795	13.4671	1.05742	0.879358	2.34346	8.09403	1.42675	2.50413	2.11974e-05	0.000793839	UP
Potri.T006000	-	ribulose-bisphosphate carboxylases	-	-	-	-	-	-	scaffold_21:439313-439519	15	17	24	5	3	9	7.94729	8.4843	12.1147	2.8731	1.43374	3.82037	9.51543	2.70907	1.81247	2.17554e-05	0.000809534	UP
Potri.001G074800	EDA18	RING/U-box superfamily protein	-	-	-	-	-	-	Chr01:5944278-5948875	20	13	21	41	49	40	0.714945	0.437747	0.715199	1.58942	1.58001	1.14567	0.62263	1.43837	-1.20798	2.24879e-05	0.000832639	DOWN
Potri.017G104240	-	disease resistance protein (TIR-NBS-LRR class), putative	GO:0000166|GO:0001882|GO:0032549|GO:0043531	nucleotide binding|nucleoside binding|ribonucleoside binding|ADP binding	-	-	-	-	Chr17:12144660-12146840	16	18	23	7	8	0	0.891699	0.944883	1.22114	0.423026	0.402145	0	1.01924	0.275057	1.88969	2.26186e-05	0.000835406	UP
Potri.009G068900	CPN10	chaperonin 10	GO:0005622|GO:0006457|GO:0005737	intracellular|protein folding|cytoplasm	-	-	-	-	Chr09:6817955-6820615	4	2	3	14	26	10	1.04705	0.492986	0.74824	3.97382	6.13872	2.09721	0.76276	4.06991	-2.4157	2.30449e-05	0.000849049	DOWN
Potri.001G407200	-	-	-	-	-	-	-	-	Chr01:42962516-42966254	45	33	33	14	14	22	2.34016	1.61645	1.63497	0.789487	0.656704	0.916636	1.86386	0.787609	1.24274	2.31119e-05	0.000850467	UP
Potri.019G028000	-	DNA-directed RNA polymerase family protein	GO:0003824|GO:0008152|GO:0044237|GO:0071704|GO:0009058|GO:0006807|GO:0016740|GO:0044238|GO:0016772|GO:0003676|GO:0006139|GO:0006725|GO:0016070|GO:0003677|GO:0016779|GO:0009059|GO:0006351|GO:0003899	catalytic activity|metabolic process|cellular metabolic process|organic substance metabolic process|biosynthetic process|nitrogen compound metabolic process|transferase activity|primary metabolic process|transferase activity, transferring phosphorus-containing groups|nucleic acid binding|nucleobase-containing compound metabolic process|cellular aromatic compound metabolic process|RNA metabolic pr…	K03046	DNA-directed RNA polymerase subunit beta'[2.7.7.6]	ko01100|ko01100|ko00230|ko00240|ko03020	Metabolic pathways|Metabolic pathways|Purine metabolism|Pyrimidine metabolism|RNA polymerase	Chr19:3192473-3193411	314	296	848	108	95	300	36.6752	32.5649	94.3623	13.6795	10.0087	28.0748	54.5341	17.2543	1.6602	2.33986e-05	0.000858899	UP
Potri.005G233300	-	Integrase-type DNA-binding superfamily protein	GO:0008152|GO:0044237|GO:0003700|GO:0071704|GO:0009058|GO:0006807|GO:0044238|GO:0006139|GO:0006725|GO:0016070|GO:0010468|GO:0009059|GO:0006351|GO:0006355	metabolic process|cellular metabolic process|transcription factor activity, sequence-specific DNA binding|organic substance metabolic process|biosynthetic process|nitrogen compound metabolic process|primary metabolic process|nucleobase-containing compound metabolic process|cellular aromatic compound metabolic process|RNA metabolic process|regulation of gene expression|macromolecule biosynthetic p…	-	-	-	-	Chr05:24124024-24124794	10	6	3	0	0	0	1.42247	0.803895	0.406631	0	0	0	0.877666	0	Inf	2.40127e-05	0.000877123	UP
Potri.010G114600	-	Heavy metal transport/detoxification superfamily protein	GO:0043169|GO:0006810|GO:0006811|GO:0046872|GO:0006812|GO:0030001	cation binding|transport|ion transport|metal ion binding|cation transport|metal ion transport	-	-	-	-	Chr10:13289966-13291571	7	10	7	1	1	0	1.42977	1.92373	1.3621	0.2214	0.184223	0	1.57187	0.135208	3.53923	2.44237e-05	0.00088855	UP
Potri.019G059000	-	-	-	-	-	-	-	-	Chr19:9070757-9071350	36	38	31	15	18	15	4.63417	4.60754	3.80187	2.09396	2.09002	1.54706	4.34786	1.91035	1.18647	2.44446e-05	0.00088855	UP
Potri.013G013500	-	alpha/beta-Hydrolases superfamily protein	-	-	-	-	-	-	Chr13:876189-877847	0	4	1	8	11	14	0	0.370289	0.0936775	0.852637	0.975094	1.1024	0.154655	0.976711	-2.65888	2.70627e-05	0.000975401	DOWN
Potri.T074632	-	-	-	-	-	-	-	-	scaffold_81:73174-73345	14	11	12	2	3	4	8.92699	6.60655	7.2896	1.38326	1.72548	2.04333	7.60771	1.71736	2.14727	2.7404e-05	0.00098651	UP
Potri.017G010500	-	O-acyltransferase (WSD1-like) family protein	GO:0003824|GO:0008152|GO:0044237|GO:0071704|GO:0009058|GO:0016740|GO:0044238|GO:0016746|GO:0006629|GO:0045017|GO:0008610|GO:0016747|GO:0008374|GO:0004144	catalytic activity|metabolic process|cellular metabolic process|organic substance metabolic process|biosynthetic process|transferase activity|primary metabolic process|transferase activity, transferring acyl groups|lipid metabolic process|glycerolipid biosynthetic process|lipid biosynthetic process|transferase activity, transferring acyl groups other than amino-acyl groups|O-acyltransferase activ…	-	-	-	-	Chr17:897221-901439	0	0	0	4	7	7	0	0	0	0.323608	0.471085	0.418429	0	0.404374	#NAME?	2.8232e-05	0.00101144	DOWN
Potri.011G023500	-	Leucine-rich repeat (LRR) family protein	GO:0005515	protein binding	-	-	-	-	Chr11:1956407-1957724	19	19	15	4	8	5	1.58104	1.48923	1.18917	0.360928	0.600472	0.333357	1.41981	0.431586	1.71798	2.85521e-05	0.00102046	UP
Potri.013G075100	-	NADH:ubiquinone/plastoquinone oxidoreductase, chain 6	GO:0003824|GO:0008152|GO:0016491|GO:0016651|GO:0055114|GO:0016655|GO:0003954|GO:0008137	catalytic activity|metabolic process|oxidoreductase activity|oxidoreductase activity, acting on NAD(P)H|oxidation-reduction process|oxidoreductase activity, acting on NAD(P)H, quinone or similar compound as acceptor|NADH dehydrogenase activity|NADH dehydrogenase (ubiquinone) activity	K05578	NAD(P)H-quinone oxidoreductase subunit 6[1.6.5.3]	ko01100|ko01100|ko00190	Metabolic pathways|Metabolic pathways|Oxidative phosphorylation	Chr13:6410411-6410767	13	15	30	3	4	8	3.99382	4.34053	8.78053	0.999472	1.10843	1.9692	5.70496	1.35903	2.06963	2.91852e-05	0.00103935	UP
Potri.005G223200	ATERF1,ERF1	ethylene response factor 1	GO:0008152|GO:0044237|GO:0003700|GO:0071704|GO:0009058|GO:0006807|GO:0044238|GO:0006139|GO:0006725|GO:0016070|GO:0010468|GO:0009059|GO:0006351|GO:0006355	metabolic process|cellular metabolic process|transcription factor activity, sequence-specific DNA binding|organic substance metabolic process|biosynthetic process|nitrogen compound metabolic process|primary metabolic process|nucleobase-containing compound metabolic process|cellular aromatic compound metabolic process|RNA metabolic process|regulation of gene expression|macromolecule biosynthetic p…	K14516	ethylene-responsive transcription factor 1[-]	ko04075|ko04016	Plant hormone signal transduction|MAPK signaling pathway - plant	Chr05:23399681-23400457	7	12	13	1	2	2	0.98814	1.59553	1.74821	0.153014	0.25464	0.22616	1.44396	0.211271	2.77286	2.97974e-05	0.00105862	UP
Potri.T059500	-	Adenine nucleotide alpha hydrolases-like superfamily protein	GO:0006950	response to stress	-	-	-	-	scaffold_61:35221-36671	9	22	21	32	43	51	1.61024	3.70762	3.57949	6.20864	6.93947	7.31087	2.96579	6.81966	-1.20129	3.00172e-05	0.0010639	DOWN
Potri.018G003501	-	LRR and NB-ARC domains-containing disease resistance protein	-	-	-	-	-	-	Chr18:245344-248339	70	55	107	24	38	49	1.28146	0.948381	1.86617	0.476463	0.627484	0.718718	1.36534	0.607555	1.16817	3.13761e-05	0.0011055	UP
Potri.T154200	-	disease resistance protein (TIR-NBS-LRR class), putative	GO:0005515|GO:0051716|GO:0000166|GO:0001882|GO:0007165|GO:0032549|GO:0043531	protein binding|cellular response to stimulus|nucleotide binding|nucleoside binding|signal transduction|ribonucleoside binding|ADP binding	-	-	-	-	scaffold_607:13182-16116	76	66	114	36	31	60	3.46584	2.83501	4.95289	1.78035	1.27516	2.1923	3.75124	1.74927	1.10062	3.20602e-05	0.00112562	UP
Potri.013G092500	-	-	-	-	-	-	-	-	Chr13:9857205-9857592	88	89	208	24	40	83	24.8747	23.6965	56.0144	7.35694	10.1987	18.7979	34.8618	12.1179	1.52451	3.38339e-05	0.00118094	UP
Potri.010G020750	-	-	-	-	-	-	-	-	Chr10:2931012-2932353	30	42	74	12	17	27	1.86314	2.45689	4.37837	0.80818	0.952306	1.34346	2.89947	1.03465	1.48665	3.72756e-05	0.00127866	UP
Potri.019G028400	-	Chloroplast Ycf2;ATPase, AAA type, core	-	-	-	-	-	-	Chr19:3198113-3199769	8	14	23	0	0	7	0.553934	0.91306	1.51717	0	0	0.388315	0.994722	0.129438	2.94203	4.10781e-05	0.00137586	UP
Potri.016G057400	BG1	beta-1,3-glucanase 1	GO:0003824|GO:0008152|GO:0071704|GO:0016787|GO:0044238|GO:0005975|GO:0016798|GO:0004553	catalytic activity|metabolic process|organic substance metabolic process|hydrolase activity|primary metabolic process|carbohydrate metabolic process|hydrolase activity, acting on glycosyl bonds|hydrolase activity, hydrolyzing O-glycosyl compounds	-	-	-	-	Chr16:3855388-3856626	5	5	12	1	0	0	0.482289	0.454286	1.10274	0.104566	0	0	0.679771	0.0348553	4.2856	4.37245e-05	0.00144986	UP
Potri.010G127600	AtCXE17,CXE17	carboxyesterase 17	-	-	-	-	-	-	Chr10:14317649-14318777	7	6	5	12	22	28	0.680057	0.548984	0.462782	1.26417	1.92773	2.17933	0.563941	1.79041	-1.66667	4.43731e-05	0.00146648	DOWN
Potri.014G054100	-	Plant protein of unknown function (DUF247)	-	-	-	-	-	-	Chr14:4255330-4257821	6	9	11	0	1	2	0.264049	0.3731	0.461231	0	0.0396981	0.0705161	0.366127	0.0367381	3.31699	4.61828e-05	0.00151454	UP
Potri.T020500	-	photosystem II reaction center protein C	GO:0008152|GO:0016020|GO:0044237|GO:0005622|GO:0022900|GO:0009579|GO:0055114|GO:0015979|GO:0009521|GO:0016168|GO:0009767|GO:0019684	metabolic process|membrane|cellular metabolic process|intracellular|electron transport chain|thylakoid|oxidation-reduction process|photosynthesis|photosystem|chlorophyll binding|photosynthetic electron transport chain|photosynthesis, light reaction	K02705	photosystem II CP43 chlorophyll apoprotein[-]	ko01100|ko01100|ko00195	Metabolic pathways|Metabolic pathways|Photosynthesis	scaffold_28:230695-231069	26	21	58	6	9	17	7.60424	5.78499	16.1609	1.90299	2.37427	3.98352	9.85004	2.75359	1.83881	4.63865e-05	0.00151955	UP
Potri.003G114100	AtMYB42,MYB42	myb domain protein 42	-	-	-	-	-	-	Chr03:13767747-13769433	13	24	11	41	37	40	1.46235	2.54291	1.17886	5.00137	3.75418	3.60505	1.72804	4.1202	-1.25358	4.7806e-05	0.00155921	DOWN
Potri.004G068000	-	GRAM domain-containing protein / ABA-responsive protein-related	-	-	-	-	-	-	Chr04:5649032-5650607	30	30	19	10	8	13	3.50779	3.30398	2.11648	1.26794	0.843734	1.21788	2.97608	1.10985	1.42305	4.94525e-05	0.00160589	UP
Potri.003G106800	DYAD,SWI1	SWITCH1	-	-	-	-	-	-	Chr03:13088738-13093253	12	15	19	3	8	0	0.299056	0.352095	0.451093	0.0810751	0.179828	0	0.367415	0.0869676	2.07886	5.01801e-05	0.00162598	UP
Potri.006G230700	ATH1	homeobox gene 1	GO:0008152|GO:0044237|GO:0071704|GO:0009058|GO:0006807|GO:0044238|GO:0003676|GO:0006139|GO:0006725|GO:0016070|GO:0003677|GO:0010468|GO:0009059|GO:0006351|GO:0006355	metabolic process|cellular metabolic process|organic substance metabolic process|biosynthetic process|nitrogen compound metabolic process|primary metabolic process|nucleic acid binding|nucleobase-containing compound metabolic process|cellular aromatic compound metabolic process|RNA metabolic process|DNA binding|regulation of gene expression|macromolecule biosynthetic process|transcription, DNA-te…	-	-	-	-	Chr06:24126429-24131206	19	26	23	47	49	48	0.535682	0.690461	0.617789	1.43701	1.24613	1.0843	0.614644	1.25581	-1.0308	5.17156e-05	0.00165894	DOWN
Potri.017G118900	-	Plant protein of unknown function (DUF827)	-	-	-	-	-	-	Chr17:13316103-13318659	35	22	26	11	11	12	0.908131	0.53768	0.642704	0.309523	0.257442	0.249457	0.696172	0.272141	1.35509	5.52173e-05	0.00174687	UP
Potri.004G022800	ATGA2OX8,GA2OX8	gibberellin 2-oxidase 8	GO:0003824|GO:0008152|GO:0016491|GO:0055114	catalytic activity|metabolic process|oxidoreductase activity|oxidation-reduction process	K04125	gibberellin 2-oxidase[1.14.11.13]	ko01110|ko00904	Biosynthesis of secondary metabolites|Diterpenoid biosynthesis	Chr04:1485694-1491839	19	26	22	42	41	60	1.02904	1.32637	1.1352	2.46678	2.00298	2.60369	1.16353	2.35782	-1.01894	5.79786e-05	0.00181941	DOWN
Potri.003G065200	-	Photosystem I, PsaA/PsaB protein	GO:0008152|GO:0016020|GO:0044237|GO:0005622|GO:0016021|GO:0009579|GO:0015979|GO:0009521|GO:0009522	metabolic process|membrane|cellular metabolic process|intracellular|integral component of membrane|thylakoid|photosynthesis|photosystem|photosystem I	-	-	-	-	Chr03:9389396-9390123	27	17	68	3	5	17	4.3676	2.59034	10.4796	0.526271	0.729556	2.20328	5.81252	1.15303	2.33373	5.89946e-05	0.00184934	UP
Potri.009G053900	ATMYB46,MYB46	myb domain protein 46	-	-	-	-	-	-	Chr09:5767986-5770326	13	21	24	38	43	46	1.39238	2.11853	2.44897	4.41359	4.15419	3.94746	1.98662	4.17175	-1.07033	5.91603e-05	0.00185065	DOWN
Potri.006G186301	-	AP2/B3 transcription factor family protein	GO:0008152|GO:0044237|GO:0003700|GO:0071704|GO:0009058|GO:0006807|GO:0044238|GO:0003676|GO:0006139|GO:0006725|GO:0016070|GO:0003677|GO:0010468|GO:0009059|GO:0006351|GO:0006355	metabolic process|cellular metabolic process|transcription factor activity, sequence-specific DNA binding|organic substance metabolic process|biosynthetic process|nitrogen compound metabolic process|primary metabolic process|nucleic acid binding|nucleobase-containing compound metabolic process|cellular aromatic compound metabolic process|RNA metabolic process|DNA binding|regulation of gene expres…	-	-	-	-	Chr06:20077748-20083377	12	7	11	31	26	26	0.558163	0.306651	0.487442	1.56362	1.09081	0.96893	0.450752	1.20778	-1.42196	6.15555e-05	0.00191354	DOWN
Potri.006G250200	-	Coatomer, beta\' subunit	GO:0005515	protein binding	-	-	-	-	Chr06:25656088-25658322	39	47	31	17	21	18	3.64653	4.13929	2.76146	1.72365	1.77109	1.34845	3.51576	1.6144	1.12284	6.35653e-05	0.00197073	UP
Potri.013G106100	CYP716A1	cytochrome P450, family 716, subfamily A, polypeptide 1	GO:0003824|GO:0008152|GO:0016491|GO:0016705|GO:0055114|GO:0043169|GO:0020037|GO:0046872|GO:0005506	catalytic activity|metabolic process|oxidoreductase activity|oxidoreductase activity, acting on paired donors, with incorporation or reduction of molecular oxygen|oxidation-reduction process|cation binding|heme binding|metal ion binding|iron ion binding	-	-	-	-	Chr13:11988829-11991242	15	18	11	5	4	3	0.863564	0.976131	0.603353	0.312195	0.207722	0.138393	0.814349	0.219437	1.89184	6.46159e-05	0.00200034	UP
Potri.007G077700	-	-	-	-	-	-	-	-	Chr07:10149195-10151315	34	63	39	18	24	21	3.17905	5.54837	3.47406	1.82512	2.0241	1.57321	4.06716	1.80748	1.17004	6.69772e-05	0.00206358	UP
Potri.T113300	ATNACK1,HIK,NACK1	ATP binding microtubule motor family protein	GO:0003824|GO:0005622|GO:0005515|GO:0016787|GO:0007017|GO:0016817|GO:0000166|GO:0001882|GO:0005875|GO:0032549|GO:0016818|GO:0005871|GO:0015631|GO:0007018|GO:0008017|GO:0005856|GO:0016462|GO:0005524|GO:0003774|GO:0003777	catalytic activity|intracellular|protein binding|hydrolase activity|microtubule-based process|hydrolase activity, acting on acid anhydrides|nucleotide binding|nucleoside binding|microtubule associated complex|ribonucleoside binding|hydrolase activity, acting on acid anhydrides, in phosphorus-containing anhydrides|kinesin complex|tubulin binding|microtubule-based movement|microtubule binding|cytos…	-	-	-	-	scaffold_178:68814-73348	66	77	119	28	48	61	2.23898	2.46042	3.84602	1.03006	1.46877	1.65799	2.84847	1.38561	1.03967	6.70043e-05	0.00206358	UP
Potri.001G261201	scpl40	serine carboxypeptidase-like 40	GO:0003824|GO:0008152|GO:0071704|GO:0016787|GO:0044238|GO:0008233|GO:0019538|GO:0006508|GO:0008236|GO:0070008|GO:0004185	catalytic activity|metabolic process|organic substance metabolic process|hydrolase activity|primary metabolic process|peptidase activity|protein metabolic process|proteolysis|serine-type peptidase activity|serine-type exopeptidase activity|serine-type carboxypeptidase activity	-	-	-	-	Chr01:27066597-27069166	19	11	15	2	4	7	3.1009	1.69096	2.33233	0.354048	0.588856	0.915314	2.37473	0.619406	1.93881	6.74069e-05	0.00206614	UP
Potri.006G047300	-	Calcium-binding EF-hand family protein	GO:0043169|GO:0046872|GO:0005509	cation binding|metal ion binding|calcium ion binding	K13448	calcium-binding protein CML[-]	ko04626	Plant-pathogen interaction	Chr06:3362914-3364728	25	13	16	38	38	49	2.95787	1.44877	1.80353	4.87543	4.05529	4.64492	2.07005	4.52521	-1.12832	6.76097e-05	0.00206729	DOWN
Potri.017G094500	AFP3	ABI five binding protein 3	GO:0051716|GO:0007165	cellular response to stimulus|signal transduction	-	-	-	-	Chr17:11136467-11139860	21	16	13	29	35	57	1.57539	1.13054	0.929108	2.35916	2.36831	3.42602	1.21168	2.71783	-1.16545	6.84344e-05	0.00208624	DOWN
Potri.001G468400	-	Late embryogenesis abundant (LEA) hydroxyproline-rich glycoprotein family	-	-	-	-	-	-	Chr01:50083871-50084641	26	32	38	13	17	14	3.96054	4.59141	5.51462	2.14741	2.33579	1.70872	4.68886	2.06398	1.18381	7.39359e-05	0.00221311	UP
Potri.007G065400	anac021,ANAC022,NAC1	NAC domain containing protein 1	GO:0008152|GO:0044237|GO:0071704|GO:0009058|GO:0006807|GO:0044238|GO:0003676|GO:0006139|GO:0006725|GO:0016070|GO:0003677|GO:0010468|GO:0009059|GO:0006351|GO:0006355	metabolic process|cellular metabolic process|organic substance metabolic process|biosynthetic process|nitrogen compound metabolic process|primary metabolic process|nucleic acid binding|nucleobase-containing compound metabolic process|cellular aromatic compound metabolic process|RNA metabolic process|DNA binding|regulation of gene expression|macromolecule biosynthetic process|transcription, DNA-te…	-	-	-	-	Chr07:8288513-8292560	0	3	0	8	7	11	0	0.238799	0	0.733084	0.533509	0.744717	0.0795998	0.670437	-3.07426	7.53685e-05	0.00225147	DOWN
Potri.012G130600	-	2 iron, 2 sulfur cluster binding	GO:0005622|GO:0051536|GO:0043231|GO:0051537	intracellular|iron-sulfur cluster binding|intracellular membrane-bounded organelle|2 iron, 2 sulfur cluster binding	-	-	-	-	Chr12:14735670-14736450	51	56	34	16	27	28	10.4942	10.8539	6.66527	3.57026	5.01135	4.61626	9.3378	4.39929	1.08581	7.60287e-05	0.00226666	UP
Potri.003G015000	ATPLDDELTA,PLDDELTA	phospholipase D delta	GO:0005515	protein binding	K01115	phospholipase D1/2[3.1.4.4]	ko01100|ko01100|ko01110|ko04144|ko00564|ko04071|ko04014|ko04072|ko04024|ko00565	Metabolic pathways|Metabolic pathways|Biosynthesis of secondary metabolites|Endocytosis|Glycerophospholipid metabolism|Sphingolipid signaling pathway|Ras signaling pathway|Phospholipase D signaling pathway|cAMP signaling pathway|Ether lipid metabolism	Chr03:1901970-1913345	43	44	37	17	24	24	1.04802	1.01009	0.859133	0.449298	0.527615	0.468669	0.972416	0.481861	1.01296	7.65482e-05	0.00227987	UP
Potri.019G093900	ATCHITIV,ATEP3,CHIV,EP3	homolog of carrot EP3-3 chitinase	GO:0003824|GO:0008152|GO:0044237|GO:0071704|GO:0006807|GO:0016787|GO:0016798|GO:0008061|GO:0016998|GO:0004553|GO:0004568|GO:0006032	catalytic activity|metabolic process|cellular metabolic process|organic substance metabolic process|nitrogen compound metabolic process|hydrolase activity|hydrolase activity, acting on glycosyl bonds|chitin binding|cell wall macromolecule catabolic process|hydrolase activity, hydrolyzing O-glycosyl compounds|chitinase activity|chitin catabolic process	-	-	-	-	Chr19:12389867-12390965	12	14	9	2	2	5	1.47056	1.61596	1.05075	0.265832	0.221068	0.490911	1.37909	0.325937	2.08105	8.13941e-05	0.00240499	UP
Potri.004G067800	-	Kunitz family trypsin and protease inhibitor protein	GO:0030234|GO:0004857|GO:0004866	enzyme regulator activity|enzyme inhibitor activity|endopeptidase inhibitor activity	-	-	-	-	Chr04:5636655-5637334	5	2	0	11	16	10	0.806416	0.303766	0	1.92405	2.32771	1.29225	0.370061	1.848	-2.32013	8.15831e-05	0.0024082	DOWN
Potri.T031700	-	-	-	-	-	-	-	-	scaffold_33:162908-166175	17	15	25	5	2	11	0.602427	0.500668	0.843996	0.192159	0.0639275	0.312324	0.64903	0.18947	1.77632	8.37693e-05	0.00246298	UP
Potri.006G280000	-	Protein kinase superfamily protein	GO:0003824|GO:0008152|GO:0044237|GO:0071704|GO:0016740|GO:0044238|GO:0016772|GO:0019538|GO:0016301|GO:0006796|GO:0016773|GO:0006464|GO:0016310|GO:0004672|GO:0006468	catalytic activity|metabolic process|cellular metabolic process|organic substance metabolic process|transferase activity|primary metabolic process|transferase activity, transferring phosphorus-containing groups|protein metabolic process|kinase activity|phosphate-containing compound metabolic process|phosphotransferase activity, alcohol group as acceptor|cellular protein modification process|phosp…	-	-	-	-	Chr06:27819369-27823729	900	341	861	311	375	388	23.2472	8.29656	21.1881	8.71148	8.73717	8.02994	17.5773	8.49287	1.04939	8.59464e-05	0.00250478	UP
Potri.T063101	-	-	-	-	-	-	-	-	scaffold_66:116723-116905	123	134	326	49	49	133	73.716	75.6446	186.138	31.8463	26.4889	63.8646	111.833	40.7333	1.45706	8.6504e-05	0.00251857	UP
Potri.013G091300	-	RING/U-box superfamily protein	GO:0005515|GO:0043169|GO:0046872|GO:0008270	protein binding|cation binding|metal ion binding|zinc ion binding	-	-	-	-	Chr13:9725232-9726231	22	18	24	33	48	56	2.41287	1.85953	2.50774	3.92493	4.74853	4.92093	2.26005	4.53146	-1.00362	8.72386e-05	0.00253502	DOWN
Potri.013G002000	-	-	-	-	-	-	-	-	Chr13:163563-163927	10	9	11	1	2	4	3.00473	2.5473	3.14901	0.32573	0.54207	0.962883	2.90035	0.610228	2.24881	9.37965e-05	0.00268892	UP
Potri.005G043700	-	Leucine-rich repeat transmembrane protein kinase protein	-	-	-	-	-	-	Chr05:3213085-3215905	10	3	4	0	0	0	0.589004	0.166467	0.224456	0	0	0	0.326642	0	Inf	9.82685e-05	0.00280366	UP
Potri.018G043750	-	NADPH dehydrogenases	-	-	-	-	-	-	Chr18:3799400-3799570	9	9	23	2	3	3	5.77239	5.43722	14.0538	1.39134	1.73557	1.54175	8.42114	1.55622	2.43597	9.94553e-05	0.0028294	UP
Potri.014G124500	-	-	-	-	-	-	-	-	Chr14:9597290-9598433	7	10	12	17	33	30	0.734722	0.98856	1.19982	1.93478	3.12403	2.52267	0.974367	2.52716	-1.37498	0.000102339	0.0029059	DOWN
Potri.001G019700	-	-	-	-	-	-	-	-	Chr01:1431058-1431699	0	0	0	5	5	5	0	0	0	0.926373	0.770465	0.684369	0	0.793736	#NAME?	0.000102866	0.00291532	DOWN
Potri.T051100	-	Acyl transferase/acyl hydrolase/lysophospholipase superfamily protein	GO:0008152|GO:0071704|GO:0044238|GO:0006629	metabolic process|organic substance metabolic process|primary metabolic process|lipid metabolic process	-	-	-	-	scaffold_48:79703-83261	10	8	21	3	4	0	0.832745	0.627551	1.66608	0.270927	0.300464	0	1.04213	0.190464	2.45194	0.000103451	0.00292335	UP
Potri.015G126400	-	-	-	-	-	-	-	-	Chr15:13898667-13900125	35	32	41	15	13	25	2.63103	2.26581	2.93628	1.22279	0.881467	1.50571	2.61104	1.20332	1.1176	0.000104723	0.00294835	UP
Potri.T107500	ADH,ADH1,ATADH,ATADH1	alcohol dehydrogenase 1	GO:0003824|GO:0008152|GO:0016491|GO:0055114|GO:0043169|GO:0046872|GO:0008270	catalytic activity|metabolic process|oxidoreductase activity|oxidation-reduction process|cation binding|metal ion binding|zinc ion binding	K00001|K18857	alcohol dehydrogenase[1.1.1.1]|alcohol dehydrogenase class-P[1.1.1.1]	ko01100|ko01100|ko01110|ko01130|ko01120|ko00010|ko00350|ko00592|ko00071|ko00830|ko00980|ko00982|ko00625|ko01220|ko00626	Metabolic pathways|Metabolic pathways|Biosynthesis of secondary metabolites|Biosynthesis of antibiotics|Microbial metabolism in diverse environments|Glycolysis / Gluconeogenesis|Tyrosine metabolism|alpha-Linolenic acid metabolism|Fatty acid degradation|Retinol metabolism|Metabolism of xenobiotics by cytochrome P450|Drug metabolism - cytochrome P450|Chloroalkane and chloroalkene degradation|Degrad…	scaffold_162:45728-48049	39	35	44	9	21	28	3.33389	2.81813	3.58344	0.834322	1.61924	1.91774	3.24515	1.4571	1.15519	0.000106436	0.00298811	UP
Potri.019G003800	-	FAD/NAD(P)-binding oxidoreductase family protein	GO:0003824|GO:0008152|GO:0016491|GO:0055114	catalytic activity|metabolic process|oxidoreductase activity|oxidation-reduction process	-	-	-	-	Chr19:388274-389776	18	8	11	3	2	3	1.5387	0.644181	0.895859	0.278107	0.154213	0.205486	1.02625	0.212602	2.27115	0.000111595	0.00311245	UP
Potri.008G067700	-	Alpha/beta hydrolase related protein	-	-	-	-	-	-	Chr08:4115686-4118130	6	5	0	8	20	20	0.813362	0.638471	0	1.1762	2.44568	2.17239	0.483944	1.93142	-1.99675	0.000113424	0.00314582	DOWN
Potri.008G143100	-	P-loop containing nucleoside triphosphate hydrolases superfamily protein	-	-	-	-	-	-	Chr08:9608950-9615758	45	49	66	14	30	39	1.14723	1.17665	1.60302	0.387036	0.689873	0.796631	1.30897	0.624513	1.06763	0.000117207	0.00323871	UP
Potri.016G082400	-	P-loop containing nucleoside triphosphate hydrolases superfamily protein	GO:0003824|GO:0005622|GO:0005515|GO:0016787|GO:0007017|GO:0016817|GO:0000166|GO:0001882|GO:0005875|GO:0032549|GO:0016818|GO:0005871|GO:0015631|GO:0007018|GO:0008017|GO:0005856|GO:0016462|GO:0005524|GO:0003774|GO:0003777	catalytic activity|intracellular|protein binding|hydrolase activity|microtubule-based process|hydrolase activity, acting on acid anhydrides|nucleotide binding|nucleoside binding|microtubule associated complex|ribonucleoside binding|hydrolase activity, acting on acid anhydrides, in phosphorus-containing anhydrides|kinesin complex|tubulin binding|microtubule-based movement|microtubule binding|cytos…	-	-	-	-	Chr16:6380108-6386655	60	52	71	23	24	51	1.47247	1.20204	1.66003	0.612097	0.531275	1.00281	1.44485	0.715394	1.01411	0.000127448	0.0034862	UP
Potri.T005800	-	ribulose-bisphosphate carboxylases	GO:0003824|GO:0008152|GO:0016829|GO:0071704|GO:0015977|GO:0016831|GO:0016984	catalytic activity|metabolic process|lyase activity|organic substance metabolic process|carbon fixation|carboxy-lyase activity|ribulose-bisphosphate carboxylase activity	K01601	ribulose-bisphosphate carboxylase large chain[4.1.1.39]	ko01100|ko01100|ko01120|ko01200|ko00630|ko00710	Metabolic pathways|Metabolic pathways|Microbial metabolism in diverse environments|Carbon metabolism|Glyoxylate and dicarboxylate metabolism|Carbon fixation in photosynthetic organisms	scaffold_21:437439-438247	33	36	72	12	19	28	4.47373	4.59711	9.29927	1.76421	2.3234	3.04136	6.12337	2.37632	1.36559	0.000129058	0.00351734	UP
Potri.012G104900	-	basic helix-loop-helix (bHLH) DNA-binding superfamily protein	GO:0005515|GO:0046983	protein binding|protein dimerization activity	-	-	-	-	Chr12:12894798-12896793	39	36	34	16	20	21	3.46628	3.01382	2.87892	1.5421	1.60337	1.49544	3.11967	1.54697	1.01195	0.000130587	0.00354617	UP
Potri.002G253400	-	GDSL-like Lipase/Acylhydrolase superfamily protein	GO:0003824|GO:0016787|GO:0016788	catalytic activity|hydrolase activity|hydrolase activity, acting on ester bonds	-	-	-	-	Chr02:24259043-24261680	1	0	0	3	10	7	0.0771619	0	0	0.251099	0.696184	0.432858	0.0257206	0.460047	-4.16078	0.000139454	0.00372914	DOWN
Potri.T030901	-	-	-	-	-	-	-	-	scaffold_32:320338-320472	54	46	36	25	23	17	43.8702	35.2008	27.8634	22.0251	16.8544	11.0653	35.6448	16.6483	1.09832	0.000139738	0.00373341	UP
Potri.002G230200	HDG2	homeodomain GLABROUS 2	GO:0008289|GO:0003676|GO:0003677	lipid binding|nucleic acid binding|DNA binding	-	-	-	-	Chr02:22130036-22134479	1	0	0	5	5	8	0.0256245	0	0	0.138988	0.115597	0.164292	0.00854149	0.139626	-4.03093	0.000140541	0.00374813	DOWN
Potri.014G075200	AHDP,ANL2	Homeobox-leucine zipper family protein / lipid-binding START domain-containing protein	GO:0008289|GO:0003676|GO:0003677	lipid binding|nucleic acid binding|DNA binding	-	-	-	-	Chr14:6088968-6094660	13	14	13	30	26	37	0.451201	0.457686	0.429859	1.12915	0.813963	1.02892	0.446249	0.990677	-1.15057	0.000141936	0.00377859	DOWN
Potri.005G035700	RPM1,RPS3	NB-ARC domain-containing disease resistance protein	GO:0000166|GO:0001882|GO:0032549|GO:0043531	nucleotide binding|nucleoside binding|ribonucleoside binding|ADP binding	K13457	disease resistance protein RPM1[-]	ko04626	Plant-pathogen interaction	Chr05:2635670-2638741	20	21	16	8	6	8	0.714014	0.706176	0.544228	0.309747	0.193218	0.228842	0.654806	0.243936	1.42457	0.000148845	0.0039102	UP
Potri.004G175200	bZIP19	Basic-leucine zipper (bZIP) transcription factor family protein	GO:0008152|GO:0044237|GO:0003700|GO:0071704|GO:0009058|GO:0006807|GO:0044238|GO:0003676|GO:0006139|GO:0006725|GO:0016070|GO:0003677|GO:0010468|GO:0009059|GO:0006351|GO:0043565|GO:0006355	metabolic process|cellular metabolic process|transcription factor activity, sequence-specific DNA binding|organic substance metabolic process|biosynthetic process|nitrogen compound metabolic process|primary metabolic process|nucleic acid binding|nucleobase-containing compound metabolic process|cellular aromatic compound metabolic process|RNA metabolic process|DNA binding|regulation of gene expres…	-	-	-	-	Chr04:19364998-19368914	395	21	18	16	16	16	5.76163	0.288519	0.250145	0.253085	0.210513	0.186994	2.1001	0.216864	3.27559	0.000153901	0.00403237	UP
Potri.001G307800	-	nodulin MtN21 /EamA-like transporter family protein	GO:0005215|GO:0016020|GO:0022857|GO:0016021	transporter activity|membrane|transmembrane transporter activity|integral component of membrane	-	-	-	-	Chr01:31107597-31111424	15	22	22	51	45	37	1.3977	1.93099	1.95308	5.15349	3.78228	2.76243	1.76059	3.8994	-1.1472	0.000154657	0.00404393	DOWN
Potri.012G140200	-	Transducin/WD40 repeat-like superfamily protein	GO:0005515	protein binding	K10143	E3 ubiquitin-protein ligase RFWD2[2.3.2.27]	ko04120|ko04712|ko04115	Ubiquitin mediated proteolysis|Circadian rhythm - plant|p53 signaling pathway	Chr12:15424828-15426145	4	12	9	17	22	34	0.332865	0.940612	0.713519	1.53402	1.6513	2.26688	0.662332	1.8174	-1.45625	0.000155062	0.00404504	DOWN
Potri.009G072900	ASN1,AT-ASN1,DIN6	glutamine-dependent asparagine synthase 1	GO:0003824|GO:0008152|GO:0044237|GO:0071704|GO:0009058|GO:0006807|GO:0044238|GO:0016874|GO:0016879|GO:0006520|GO:0016884|GO:0008652|GO:0004066|GO:0019752|GO:0006529	catalytic activity|metabolic process|cellular metabolic process|organic substance metabolic process|biosynthetic process|nitrogen compound metabolic process|primary metabolic process|ligase activity|ligase activity, forming carbon-nitrogen bonds|cellular amino acid metabolic process|carbon-nitrogen ligase activity, with glutamine as amido-N-donor|cellular amino acid biosynthetic process|asparagin…	K01953	asparagine synthase (glutamine-hydrolysing)[6.3.5.4]	ko01100|ko01100|ko01110|ko00250	Metabolic pathways|Metabolic pathways|Biosynthesis of secondary metabolites|Alanine, aspartate and glutamate metabolism	Chr09:7110623-7114288	1	0	0	7	5	6	0.0545779	0	0	0.414393	0.246211	0.262458	0.0181926	0.307687	-4.08004	0.00015688	0.00407459	DOWN
Potri.005G053600	-	Tetratricopeptide repeat (TPR)-like superfamily protein	-	-	-	-	-	-	Chr05:3822542-3824488	25	24	22	10	10	11	1.40829	1.27341	1.18068	0.610851	0.508104	0.496478	1.28746	0.538477	1.25757	0.000157367	0.00408019	UP
Potri.019G115866	-	Ankyrin repeat family protein	-	-	-	-	-	-	Chr19:14459765-14463686	16	13	12	6	5	0	0.576689	0.441343	0.412031	0.234513	0.16255	0	0.476688	0.132354	1.84864	0.000164622	0.00423154	UP
Potri.003G212900	-	Major facilitator superfamily protein	GO:0005215|GO:0016020|GO:0006810	transporter activity|membrane|transport	-	-	-	-	Chr03:21104764-21107458	1	0	0	5	10	4	0.051213	0	0	0.277782	0.462063	0.164153	0.017071	0.301333	-4.14174	0.00016647	0.00426069	DOWN
Potri.001G270300	CYP87A2	cytochrome P450, family 87, subfamily A, polypeptide 2	GO:0003824|GO:0008152|GO:0016491|GO:0016705|GO:0055114|GO:0043169|GO:0020037|GO:0046872|GO:0005506	catalytic activity|metabolic process|oxidoreductase activity|oxidoreductase activity, acting on paired donors, with incorporation or reduction of molecular oxygen|oxidation-reduction process|cation binding|heme binding|metal ion binding|iron ion binding	-	-	-	-	Chr01:27752365-27754883	27	25	27	10	12	15	1.95075	1.70133	1.85846	0.783482	0.782038	0.86831	1.83684	0.811277	1.17896	0.000170899	0.00435683	UP
Potri.006G223300	-	Pentatricopeptide repeat (PPR-like) superfamily protein	-	-	-	-	-	-	Chr06:23561432-23563184	0	0	44	0	0	0	0	0	2.62267	0	0	0	0.874225	0	Inf	0.000173381	0.00440831	UP
Potri.016G052301	-	-	-	-	-	-	-	-	Chr16:3341702-3342056	31	21	29	14	8	13	9.57733	6.11091	8.53551	4.69022	2.22936	3.21794	8.07458	3.37917	1.25672	0.00017582	0.00443908	UP
Potri.009G064800	CYP87A2	cytochrome P450, family 87, subfamily A, polypeptide 2	GO:0003824|GO:0008152|GO:0016491|GO:0016705|GO:0055114|GO:0043169|GO:0020037|GO:0046872|GO:0005506	catalytic activity|metabolic process|oxidoreductase activity|oxidoreductase activity, acting on paired donors, with incorporation or reduction of molecular oxygen|oxidation-reduction process|cation binding|heme binding|metal ion binding|iron ion binding	-	-	-	-	Chr09:6552266-6555170	22	18	11	5	8	2	1.19865	0.92376	0.570982	0.295445	0.393156	0.0872956	0.897796	0.258632	1.79549	0.00018021	0.00452693	UP
Potri.019G028100	-	Photosystem I, PsaA/PsaB protein	GO:0008152|GO:0016020|GO:0044237|GO:0005622|GO:0016021|GO:0009579|GO:0015979|GO:0009521|GO:0009522	metabolic process|membrane|cellular metabolic process|intracellular|integral component of membrane|thylakoid|photosynthesis|photosystem|photosystem I	K02689|K02690	photosystem I P700 chlorophyll a apoprotein A1[-]|photosystem I P700 chlorophyll a apoprotein A2[-]	ko01100|ko01100|ko00195	Metabolic pathways|Metabolic pathways|Photosynthesis	Chr19:3194810-3195886	106	118	339	35	43	124	10.7944	11.3186	32.8891	3.8651	3.94976	10.1174	18.334	5.97741	1.61693	0.000181197	0.00454791	UP
Potri.001G097300	ALMT9,AtALMT9	aluminum-activated malate transporter 9	GO:0006810|GO:0006811|GO:0006820|GO:0015740|GO:0015743	transport|ion transport|anion transport|C4-dicarboxylate transport|malate transport	-	-	-	-	Chr01:7644926-7648417	33	26	20	7	17	7	1.79437	1.33163	1.0361	0.412749	0.833799	0.304953	1.38737	0.517167	1.42365	0.000181783	0.00455879	UP
Potri.007G097400	-	-	-	-	-	-	-	-	Chr07:12366565-12367200	8	9	5	19	23	20	1.37961	1.46189	0.821512	3.55308	3.57758	2.7633	1.22101	3.29799	-1.43352	0.00018356	0.00459948	DOWN
Potri.005G154350	-	ribosomal protein L23.1	GO:0005198|GO:0008152|GO:0044237|GO:0005622|GO:0071704|GO:0009058|GO:0003735|GO:0006807|GO:0044238|GO:0005737|GO:0019538|GO:0005840|GO:0009059|GO:0006412|GO:0043043	structural molecule activity|metabolic process|cellular metabolic process|intracellular|organic substance metabolic process|biosynthetic process|structural constituent of ribosome|nitrogen compound metabolic process|primary metabolic process|cytoplasm|protein metabolic process|ribosome|macromolecule biosynthetic process|translation|peptide biosynthetic process	K02892	large subunit ribosomal protein L23[-]	ko03010	Ribosome	Chr05:14814420-14814926	56	71	226	16	23	68	12.1139	14.4669	46.5767	3.75335	4.48785	11.7858	24.3859	6.67566	1.86906	0.00019395	0.00479144	UP
Potri.010G169000	-	Transmembrane amino acid transporter family protein	-	-	-	-	-	-	Chr10:17106123-17107998	28	33	28	16	12	15	2.08904	2.31911	1.99026	1.29452	0.807574	0.896663	2.1328	0.999587	1.09335	0.000198731	0.00488497	UP
Potri.007G116900	ADH,ADH1,ATADH,ATADH1	alcohol dehydrogenase 1	GO:0003824|GO:0008152|GO:0016491|GO:0055114|GO:0043169|GO:0046872|GO:0008270	catalytic activity|metabolic process|oxidoreductase activity|oxidation-reduction process|cation binding|metal ion binding|zinc ion binding	-	-	-	-	Chr07:13754957-13755313	0	0	0	3	5	6	0	0	0	2.76598	3.83441	4.08743	0	3.5626	#NAME?	0.000200772	0.00491118	DOWN
Potri.002G216800	RPM1,RPS3	NB-ARC domain-containing disease resistance protein	GO:0000166|GO:0001882|GO:0032549|GO:0043531	nucleotide binding|nucleoside binding|ribonucleoside binding|ADP binding	K13457	disease resistance protein RPM1[-]	ko04626	Plant-pathogen interaction	Chr02:19985076-19987838	18	35	50	12	9	18	0.714498	1.3086	1.89086	0.516557	0.32224	0.57247	1.30465	0.470422	1.47164	0.000204266	0.00497479	UP
Potri.013G141800	-	Photosystem I, PsaA/PsaB protein	GO:0008152|GO:0016020|GO:0044237|GO:0005622|GO:0016021|GO:0009579|GO:0015979|GO:0009521|GO:0009522	metabolic process|membrane|cellular metabolic process|intracellular|integral component of membrane|thylakoid|photosynthesis|photosystem|photosystem I	K02689	photosystem I P700 chlorophyll a apoprotein A1[-]	ko01100|ko01100|ko00195	Metabolic pathways|Metabolic pathways|Photosynthesis	Chr13:14853384-14854012	48	57	190	16	14	55	8.81819	9.86337	33.2544	3.18752	2.31991	8.09567	17.312	4.53437	1.9328	0.000204373	0.00497479	UP
Potri.019G094000	ATCHITIV,ATEP3,CHIV,EP3	homolog of carrot EP3-3 chitinase	GO:0003824|GO:0008152|GO:0044237|GO:0071704|GO:0006807|GO:0016787|GO:0016798|GO:0008061|GO:0016998|GO:0004553|GO:0004568|GO:0006032	catalytic activity|metabolic process|cellular metabolic process|organic substance metabolic process|nitrogen compound metabolic process|hydrolase activity|hydrolase activity, acting on glycosyl bonds|chitin binding|cell wall macromolecule catabolic process|hydrolase activity, hydrolyzing O-glycosyl compounds|chitinase activity|chitin catabolic process	K01183	chitinase[3.2.1.14]	ko01100|ko01100|ko00520	Metabolic pathways|Metabolic pathways|Amino sugar and nucleotide sugar metabolism	Chr19:12401356-12402456	4	4	6	0	0	0	0.489092	0.460694	0.698892	0	0	0	0.549559	0	Inf	0.000204806	0.00498128	UP
Potri.010G013200	-	Heat shock protein DnaJ, N-terminal with domain of unknown function (DUF1977)	-	-	K09518	DnaJ homolog subfamily B member 12[-]	ko04141	Protein processing in endoplasmic reticulum	Chr10:1673269-1674553	29	26	179	260	295	364	2.47512	2.09019	14.5552	24.0647	22.7111	24.8919	6.37351	23.8893	-1.9062	0.000206483	0.00500981	DOWN
Potri.014G034500	-	-	-	-	-	-	-	-	Chr14:2833958-2834338	2	3	2	9	7	21	0.575575	0.813548	0.548474	2.80954	1.81757	4.8435	0.645866	3.15687	-2.28919	0.00020849	0.00504621	DOWN
Potri.006G188300	-	Glycosyl hydrolase family protein with chitinase insertion domain	GO:0003824|GO:0008152|GO:0071704|GO:0016787|GO:0044238|GO:0005975|GO:0016798|GO:0004553	catalytic activity|metabolic process|organic substance metabolic process|hydrolase activity|primary metabolic process|carbohydrate metabolic process|hydrolase activity, acting on glycosyl bonds|hydrolase activity, hydrolyzing O-glycosyl compounds	K01183	chitinase[3.2.1.14]	ko01100|ko01100|ko00520	Metabolic pathways|Metabolic pathways|Amino sugar and nucleotide sugar metabolism	Chr06:20309811-20311234	10	6	5	2	0	0	0.891647	0.503905	0.424782	0.193431	0	0	0.606778	0.0644769	3.23431	0.00021552	0.00518083	UP
Potri.014G026300	HYR1	UDP-Glycosyltransferase superfamily protein	GO:0003824|GO:0008152|GO:0016740|GO:0016757|GO:0016758	catalytic activity|metabolic process|transferase activity|transferase activity, transferring glycosyl groups|transferase activity, transferring hexosyl groups	-	-	-	-	Chr14:2238732-2239373	4	6	5	13	17	17	0.683358	0.965426	0.813834	2.40831	2.61958	2.32682	0.820872	2.45157	-1.57848	0.000217765	0.0052283	DOWN
Potri.013G097900	-	disease resistance protein (TIR-NBS-LRR class), putative	GO:0005515|GO:0051716|GO:0000166|GO:0001882|GO:0007165|GO:0032549|GO:0043531	protein binding|cellular response to stimulus|nucleotide binding|nucleoside binding|signal transduction|ribonucleoside binding|ADP binding	-	-	-	-	Chr13:10687945-10696151	8	7	3	1	0	0	0.293554	0.241915	0.104889	0.0397764	0	0	0.213452	0.0132588	4.00889	0.000220011	0.00526527	UP
Potri.001G430800	-	Di-glucose binding protein with Kinesin motor domain	GO:0003824|GO:0005622|GO:0005515|GO:0016787|GO:0007017|GO:0016817|GO:0000166|GO:0001882|GO:0005875|GO:0032549|GO:0016818|GO:0005871|GO:0015631|GO:0007018|GO:0008017|GO:0005856|GO:0016462|GO:0005524|GO:0003774|GO:0003777	catalytic activity|intracellular|protein binding|hydrolase activity|microtubule-based process|hydrolase activity, acting on acid anhydrides|nucleotide binding|nucleoside binding|microtubule associated complex|ribonucleoside binding|hydrolase activity, acting on acid anhydrides, in phosphorus-containing anhydrides|kinesin complex|tubulin binding|microtubule-based movement|microtubule binding|cytos…	-	-	-	-	Chr01:46122699-46127256	33	46	35	19	23	15	1.30002	1.70693	1.31362	0.811696	0.817291	0.473454	1.44019	0.700813	1.03916	0.000220672	0.00527262	UP
Potri.006G197500	-	calmodulin-binding family protein	-	-	-	-	-	-	Chr06:21297986-21302250	6	3	5	0	0	0	0.2055	0.0968025	0.163173	0	0	0	0.155159	0	Inf	0.000225134	0.00536413	UP
Potri.003G002300	ATCLC-C,CLC-C	chloride channel C	GO:0005215|GO:0016020|GO:0022857|GO:0055085|GO:0006810|GO:0006811|GO:0006820|GO:0005216|GO:0008308|GO:0006821|GO:0005247	transporter activity|membrane|transmembrane transporter activity|transmembrane transport|transport|ion transport|anion transport|ion channel activity|voltage-gated anion channel activity|chloride transport|voltage-gated chloride channel activity	-	-	-	-	Chr03:267261-270800	15	16	22	7	5	7	0.560126	0.562768	0.782695	0.283457	0.168416	0.209428	0.635196	0.220434	1.52685	0.000233549	0.00553943	UP
Potri.002G072400	-	Mog1/PsbP/DUF1795-like photosystem II reaction center PsbP family protein	GO:0008152|GO:0016020|GO:0044237|GO:0005622|GO:0019898|GO:0042651|GO:0009579|GO:0009654|GO:0043169|GO:0015979|GO:0009521|GO:0009523|GO:0046872|GO:0005509	metabolic process|membrane|cellular metabolic process|intracellular|extrinsic component of membrane|thylakoid membrane|thylakoid|photosystem II oxygen evolving complex|cation binding|photosynthesis|photosystem|photosystem II|metal ion binding|calcium ion binding	-	-	-	-	Chr02:5005647-5007279	29	41	34	13	20	21	3.21916	4.28703	3.59574	1.56492	2.00259	1.86779	3.70064	1.81176	1.03038	0.000235265	0.0055634	UP
Potri.008G116301	-	-	-	-	-	-	-	-	Chr08:7449589-7450915	8	16	16	2	1	8	0.661214	1.24555	1.25989	0.179292	0.0745499	0.529769	1.05555	0.261204	2.01475	0.000243258	0.00569822	UP
Potri.006G186400	-	-	-	-	-	-	-	-	Chr06:20083773-20084152	2	2	4	9	13	12	0.57709	0.543582	1.09983	2.81693	3.38437	2.77488	0.740169	2.99206	-2.01521	0.000246654	0.00576872	DOWN
Potri.T013900	-	NB-ARC domain-containing disease resistance protein	GO:0005515|GO:0000166|GO:0001882|GO:0032549|GO:0043531	protein binding|nucleotide binding|nucleoside binding|ribonucleoside binding|ADP binding	-	-	-	-	scaffold_25:317525-322181	10	13	15	3	3	6	0.2355	0.288385	0.336552	0.0766183	0.0637284	0.113223	0.286812	0.0845231	1.76269	0.000252144	0.00588329	UP
Potri.T167400	WAK2	wall-associated kinase 2	GO:0003824|GO:0008152|GO:0016020|GO:0044237|GO:0071704|GO:0016740|GO:0044238|GO:0016021|GO:0016772|GO:0019538|GO:0016301|GO:0006796|GO:0016773|GO:0006464|GO:0016310|GO:0004672|GO:0006468|GO:0004674	catalytic activity|metabolic process|membrane|cellular metabolic process|organic substance metabolic process|transferase activity|primary metabolic process|integral component of membrane|transferase activity, transferring phosphorus-containing groups|protein metabolic process|kinase activity|phosphate-containing compound metabolic process|phosphotransferase activity, alcohol group as acceptor|cel…	-	-	-	-	scaffold_918:11530-14801	4	3	7	0	0	0	0.225213	0.159118	0.375488	0	0	0	0.253273	0	Inf	0.000256087	0.00594278	UP
Potri.009G138600	SDG31,SUVR4	SET-domain containing protein lysine methyltransferase family protein	GO:0003824|GO:0008152|GO:0044237|GO:0005622|GO:0005515|GO:0071704|GO:0032259|GO:0016740|GO:0044238|GO:0043169|GO:0043231|GO:0016570|GO:0019538|GO:0008168|GO:0006479|GO:0051276|GO:0005634|GO:0046872|GO:0006464|GO:0016568|GO:0034968|GO:0008170|GO:0008270|GO:0018024	catalytic activity|metabolic process|cellular metabolic process|intracellular|protein binding|organic substance metabolic process|methylation|transferase activity|primary metabolic process|cation binding|intracellular membrane-bounded organelle|histone modification|protein metabolic process|methyltransferase activity|protein methylation|chromosome organization|nucleus|metal ion binding|cellular p…	-	-	-	-	Chr09:11095583-11099245	7	8	5	2	0	0	0.259474	0.279312	0.176574	0.0804055	0	0	0.238453	0.0268018	3.1533	0.00025813	0.00598089	UP
Potri.018G080566	ATGSR2,GSR2	glutamine synthase clone F11	-	-	-	-	-	-	Chr18:10746261-10747446	0	0	2	5	9	7	0	0	0.264183	0.751873	1.1256	0.777612	0.0880609	0.885028	-3.32915	0.000259769	0.0060142	DOWN
Potri.003G105500	-	UDP-Glycosyltransferase superfamily protein	-	-	-	-	-	-	Chr03:12985191-12986724	23	42	44	19	15	14	1.75541	3.01939	3.19941	1.57255	1.03265	0.856146	2.65807	1.15378	1.20401	0.000260741	0.00602266	UP
Potri.003G195600	-	-	-	-	-	-	-	-	Chr03:19875283-19880343	2	2	0	5	9	12	0.0364518	0.0343353	0	0.0988583	0.147997	0.175275	0.0235957	0.14071	-2.57613	0.000261658	0.00603918	DOWN
Potri.014G058300	-	-	-	-	-	-	-	-	Chr14:4507002-4508041	15	20	7	4	3	4	2.69245	3.38149	1.19714	0.778565	0.485734	0.575208	2.42369	0.613169	1.98285	0.000266297	0.0061273	UP
Potri.015G026800	SLAH3	SLAC1 homologue 3	GO:0005215|GO:0016020|GO:0022857|GO:0016021|GO:0006873|GO:0005216|GO:0008308	transporter activity|membrane|transmembrane transporter activity|integral component of membrane|cellular ion homeostasis|ion channel activity|voltage-gated anion channel activity	-	-	-	-	Chr15:2095911-2097408	3	1	0	9	14	5	0.240372	0.0754423	0	0.78191	1.01168	0.320939	0.105271	0.704842	-2.74319	0.000291833	0.00661928	DOWN
Potri.016G073700	ABA2,ATABA2,ATSDR1,GIN1,ISI4,SDR1,SIS4,SRE1	NAD(P)-binding Rossmann-fold superfamily protein	-	-	-	-	-	-	Chr16:5563803-5564869	1	2	0	3	12	10	0.127053	0.239352	0	0.413455	1.37559	1.01823	0.122135	0.935757	-2.93765	0.000291893	0.00661928	DOWN
Potri.012G124200	-	Leucine-rich repeat receptor-like protein kinase family protein	GO:0003824|GO:0008152|GO:0044237|GO:0005515|GO:0071704|GO:0016740|GO:0044238|GO:0016772|GO:0000166|GO:0001882|GO:0019538|GO:0016301|GO:0032549|GO:0006796|GO:0016773|GO:0006464|GO:0016310|GO:0005524|GO:0004672|GO:0006468	catalytic activity|metabolic process|cellular metabolic process|protein binding|organic substance metabolic process|transferase activity|primary metabolic process|transferase activity, transferring phosphorus-containing groups|nucleotide binding|nucleoside binding|protein metabolic process|kinase activity|ribonucleoside binding|phosphate-containing compound metabolic process|phosphotransferase ac…	-	-	-	-	Chr12:14312154-14315479	0	1	0	5	4	9	0	0.0346347	0	0.19944	0.1327	0.265197	0.0115449	0.199112	-4.10826	0.000298732	0.00675383	DOWN
Potri.013G142100	-	photosystem II reaction center protein M	GO:0008152|GO:0016020|GO:0044237|GO:0005622|GO:0016021|GO:0009579|GO:0015979|GO:0009521|GO:0009523|GO:0019684	metabolic process|membrane|cellular metabolic process|intracellular|integral component of membrane|thylakoid|photosynthesis|photosystem|photosystem II|photosynthesis, light reaction	K02714	photosystem II PsbM protein[-]	ko01100|ko01100|ko00195	Metabolic pathways|Metabolic pathways|Photosynthesis	Chr13:14867350-14867454	8	7	14	1	2	4	8.35649	6.88651	13.9312	1.1323	1.88434	3.34716	9.72475	2.12127	2.19673	0.000303482	0.0068405	UP
Potri.001G454000	PGY2	Ribosomal protein L6 family	GO:0005198|GO:0008152|GO:0044237|GO:0005622|GO:0071704|GO:0009058|GO:0003735|GO:0006807|GO:0044238|GO:0003676|GO:0005737|GO:0019538|GO:0003723|GO:0005840|GO:0009059|GO:0006412|GO:0043043|GO:0019843	structural molecule activity|metabolic process|cellular metabolic process|intracellular|organic substance metabolic process|biosynthetic process|structural constituent of ribosome|nitrogen compound metabolic process|primary metabolic process|nucleic acid binding|cytoplasm|protein metabolic process|RNA binding|ribosome|macromolecule biosynthetic process|translation|peptide biosynthetic process|rRN…	K02940	large subunit ribosomal protein L9e[-]	ko03010	Ribosome	Chr01:48855143-48856790	26	28	24	20	1077	33	4.27525	4.33669	3.75973	3.5662	159.739	4.34757	4.12389	55.8841	-3.76036	0.000305642	0.0068788	DOWN
Potri.010G122600	-	-	-	-	-	-	-	-	Chr10:13918276-13918944	15	14	19	5	7	6	2.45903	2.16186	2.96751	0.888986	1.03512	0.788158	2.52947	0.904087	1.4843	0.000308389	0.00693539	UP
Potri.013G120800	-	O-methyltransferase family protein	GO:0003824|GO:0005515|GO:0016740|GO:0046983|GO:0008168|GO:0008171	catalytic activity|protein binding|transferase activity|protein dimerization activity|methyltransferase activity|O-methyltransferase activity	-	-	-	-	Chr13:13423084-13424666	23	31	13	30	54	71	2.25024	2.85675	1.21174	3.18298	4.76548	5.56559	2.10624	4.50468	-1.09675	0.00031369	0.00702368	DOWN
Potri.013G139900	-	-	-	-	-	-	-	-	Chr13:14790129-14790383	42	58	149	6	15	51	28.4341	36.9859	96.1038	4.40508	9.15998	27.664	53.8413	13.743	1.97001	0.000313537	0.00702368	UP
Potri.014G043500	-	Haloacid dehalogenase-like hydrolase (HAD) superfamily protein	-	-	-	-	-	-	Chr14:3481160-3482575	4	9	7	0	0	2	0.435234	0.922386	0.725645	0	0	0.174331	0.694422	0.0581105	3.57894	0.000316883	0.00707311	UP
Potri.019G027700	-	DNA-directed RNA polymerase family protein	-	-	-	-	-	-	Chr19:3187428-3187718	6	8	14	1	1	3	2.2612	2.84015	5.02674	0.408562	0.339958	0.905976	3.37603	0.551499	2.6139	0.000323116	0.00718	UP
Potri.013G138766	-	NADH-Ubiquinone/plastoquinone (complex I) protein	-	-	-	-	-	-	Chr13:14752339-14752989	35	26	102	10	9	30	5.89657	4.1258	16.3714	1.82692	1.36766	4.04945	8.79791	2.41468	1.86533	0.000335501	0.00741656	UP
Potri.001G074100	ATPUP4,PUP4	purine permease 4	GO:0005215|GO:0016020|GO:0016021	transporter activity|membrane|integral component of membrane	-	-	-	-	Chr01:5890569-5891856	4	1	3	6	11	21	0.340618	0.0801868	0.24341	0.554055	0.84488	1.43274	0.221405	0.943893	-2.09193	0.000338289	0.0074616	DOWN
Potri.006G191100	-	-	-	-	-	-	-	-	Chr06:20595426-20596147	22	19	18	31	56	40	3.34193	2.71857	2.60504	5.10666	7.67307	4.86831	2.88851	5.88268	-1.02615	0.000349977	0.00765766	DOWN
Potri.003G173500	CYP78A10	cytochrome P450, family 78, subfamily A, polypeptide 10	GO:0003824|GO:0008152|GO:0016491|GO:0016705|GO:0055114|GO:0043169|GO:0020037|GO:0046872|GO:0005506	catalytic activity|metabolic process|oxidoreductase activity|oxidoreductase activity, acting on paired donors, with incorporation or reduction of molecular oxygen|oxidation-reduction process|cation binding|heme binding|metal ion binding|iron ion binding	-	-	-	-	Chr03:18285845-18288598	1	3	0	17	16	3	0.0610167	0.172488	0	1.12512	0.880826	0.146711	0.077835	0.717552	-3.20459	0.000363741	0.00791189	DOWN
Potri.008G056400	APK1,APK1A	Protein kinase superfamily protein	GO:0003824|GO:0008152|GO:0044237|GO:0071704|GO:0016740|GO:0044238|GO:0016772|GO:0019538|GO:0016301|GO:0006796|GO:0016773|GO:0006464|GO:0016310|GO:0004672|GO:0006468	catalytic activity|metabolic process|cellular metabolic process|organic substance metabolic process|transferase activity|primary metabolic process|transferase activity, transferring phosphorus-containing groups|protein metabolic process|kinase activity|phosphate-containing compound metabolic process|phosphotransferase activity, alcohol group as acceptor|cellular protein modification process|phosp…	K04733	interleukin-1 receptor-associated kinase 4[2.7.11.1]	ko04064|ko04624	NF-kappa B signaling pathway|Toll and Imd signaling pathway	Chr08:3341189-3344119	9	4	5	17	12	33	0.46959	0.196595	0.248564	0.961865	0.564764	1.37956	0.304916	0.968729	-1.66768	0.000364014	0.00791206	DOWN
Potri.006G040900	SSL2	strictosidine synthase-like 2	-	-	-	-	-	-	Chr06:2917882-2927193	9	12	10	3	2	3	0.108315	0.136039	0.114654	0.0391541	0.0217113	0.02893	0.11967	0.0299318	1.99931	0.000372084	0.00804403	UP
Potri.006G095300	-	O-fucosyltransferase family protein	-	-	-	-	-	-	Chr06:7256385-7259907	17	21	35	6	14	8	0.484288	0.563473	0.949904	0.185357	0.359737	0.182598	0.665888	0.242564	1.45691	0.0003734	0.00806323	UP
Potri.009G092900	GH3.1	Auxin-responsive GH3 family protein	-	-	K14487	auxin responsive GH3 gene family[-]	ko04075	Plant hormone signal transduction	Chr09:8458101-8460228	18	23	27	10	8	12	1.04453	1.25717	1.49266	0.629273	0.418742	0.557913	1.26479	0.535309	1.24045	0.000376942	0.00811622	UP
Potri.016G099200	AtMYB36,MYB36	myb domain protein 36	-	-	-	-	-	-	Chr16:9684063-9685721	9	15	13	20	40	30	0.897344	1.4087	1.23487	2.16241	3.59737	2.39654	1.1803	2.71877	-1.2038	0.000378068	0.00812288	DOWN
Potri.018G040800	-	Major facilitator superfamily protein	GO:0005215|GO:0016020|GO:0006810	transporter activity|membrane|transport	-	-	-	-	Chr18:3411826-3414436	0	0	0	4	5	4	0	0	0	0.252496	0.262547	0.186546	0	0.233863	#NAME?	0.000380812	0.00815249	DOWN
Potri.006G262900	-	-	-	-	-	-	-	-	Chr06:26581540-26582530	8	14	7	2	2	2	0.8854	1.45942	0.738093	0.240081	0.199652	0.177322	1.02764	0.205685	2.32082	0.000384061	0.00821026	UP
Potri.001G288100	-	-	-	-	-	-	-	-	Chr01:29391004-29391222	61	58	187	22	16	65	30.5485	27.3594	89.2207	11.9478	7.2276	26.0815	49.0429	15.0856	1.70087	0.000384456	0.00821282	UP
Potri.011G113900	-	photosystem II reaction center protein B	GO:0008152|GO:0016020|GO:0044237|GO:0005622|GO:0022900|GO:0009579|GO:0055114|GO:0015979|GO:0009521|GO:0016168|GO:0009767|GO:0019684	metabolic process|membrane|cellular metabolic process|intracellular|electron transport chain|thylakoid|oxidation-reduction process|photosynthesis|photosystem|chlorophyll binding|photosynthetic electron transport chain|photosynthesis, light reaction	K02704	photosystem II CP47 chlorophyll apoprotein[-]	ko01100|ko01100|ko00195	Metabolic pathways|Metabolic pathways|Photosynthesis	Chr11:13861381-13862907	132	136	321	76	102	129	9.48075	9.20073	21.9651	5.91948	6.60814	7.42356	13.5489	6.65039	1.02666	0.000389112	0.0083004	UP
Potri.004G149000	AOS,CYP74A,DDE2	allene oxide synthase	GO:0003824|GO:0008152|GO:0016491|GO:0016705|GO:0055114|GO:0043169|GO:0020037|GO:0046872|GO:0005506	catalytic activity|metabolic process|oxidoreductase activity|oxidoreductase activity, acting on paired donors, with incorporation or reduction of molecular oxygen|oxidation-reduction process|cation binding|heme binding|metal ion binding|iron ion binding	K01723	hydroperoxide dehydratase[4.2.1.92]	ko01100|ko01100|ko01110|ko00592	Metabolic pathways|Metabolic pathways|Biosynthesis of secondary metabolites|alpha-Linolenic acid metabolism	Chr04:17175429-17176917	10	2	2	14	17	18	0.736552	0.138725	0.140342	1.11822	1.12946	1.06228	0.338539	1.10332	-1.70446	0.000399783	0.00850979	DOWN
Potri.002G109601	AGL16	AGAMOUS-like 16	GO:0008152|GO:0044237|GO:0005622|GO:0003700|GO:0071704|GO:0009058|GO:0006807|GO:0044238|GO:0006139|GO:0006725|GO:0043231|GO:0016070|GO:0010468|GO:0005634|GO:0009059|GO:0006351|GO:0006355	metabolic process|cellular metabolic process|intracellular|transcription factor activity, sequence-specific DNA binding|organic substance metabolic process|biosynthetic process|nitrogen compound metabolic process|primary metabolic process|nucleobase-containing compound metabolic process|cellular aromatic compound metabolic process|intracellular membrane-bounded organelle|RNA metabolic process|reg…	-	-	-	-	Chr02:8070056-8076275	20	20	22	8	12	0	0.289565	0.272751	0.303469	0.125616	0.156717	0	0.288595	0.0941112	1.61661	0.000407391	0.00862866	UP
Potri.T041900	-	Leucine-rich repeat receptor-like protein kinase family protein	GO:0003824|GO:0008152|GO:0044237|GO:0005515|GO:0071704|GO:0016740|GO:0044238|GO:0016772|GO:0000166|GO:0001882|GO:0019538|GO:0016301|GO:0032549|GO:0006796|GO:0016773|GO:0006464|GO:0016310|GO:0005524|GO:0004672|GO:0006468	catalytic activity|metabolic process|cellular metabolic process|protein binding|organic substance metabolic process|transferase activity|primary metabolic process|transferase activity, transferring phosphorus-containing groups|nucleotide binding|nucleoside binding|protein metabolic process|kinase activity|ribonucleoside binding|phosphate-containing compound metabolic process|phosphotransferase ac…	-	-	-	-	scaffold_39:272523-275723	24	41	37	15	19	17	0.86103	1.38554	1.26467	0.583597	0.61486	0.488656	1.17041	0.562371	1.05742	0.000408551	0.00864709	UP
Potri.013G142300	-	DNA-directed RNA polymerase family protein	GO:0003824|GO:0008152|GO:0044237|GO:0071704|GO:0009058|GO:0006807|GO:0016740|GO:0044238|GO:0016772|GO:0003676|GO:0006139|GO:0006725|GO:0016070|GO:0003677|GO:0016779|GO:0009059|GO:0006351|GO:0003899	catalytic activity|metabolic process|cellular metabolic process|organic substance metabolic process|biosynthetic process|nitrogen compound metabolic process|transferase activity|primary metabolic process|transferase activity, transferring phosphorus-containing groups|nucleic acid binding|nucleobase-containing compound metabolic process|cellular aromatic compound metabolic process|RNA metabolic pr…	-	-	-	-	Chr13:14873762-14875272	401	420	832	116	155	481	61.0831	60.2617	120.742	19.1618	21.2971	58.7047	80.6956	33.0545	1.28764	0.000410354	0.00867293	UP
Potri.001G200800	EDA17,HTH	Glucose-methanol-choline (GMC) oxidoreductase family protein	GO:0003824|GO:0008152|GO:0044237|GO:0016491|GO:0048037|GO:0071704|GO:0044238|GO:0055114|GO:0016614|GO:0006629|GO:0000166|GO:0050662|GO:0006631|GO:0050660|GO:0019752|GO:0010430	catalytic activity|metabolic process|cellular metabolic process|oxidoreductase activity|cofactor binding|organic substance metabolic process|primary metabolic process|oxidation-reduction process|oxidoreductase activity, acting on CH-OH group of donors|lipid metabolic process|nucleotide binding|coenzyme binding|fatty acid metabolic process|flavin adenine dinucleotide binding|carboxylic acid metabo…	K15403	fatty acid omega-hydroxy dehydrogenase [EC:1.1.-.-][-]	ko00073	Cutin, suberine and wax biosynthesis	Chr01:19634777-19639222	0	0	0	3	2	11	0	0	0	0.187204	0.103807	0.507158	0	0.266056	#NAME?	0.00041107	0.00868193	DOWN
Potri.011G044800	-	-	-	-	-	-	-	-	Chr11:3797042-3797326	4	4	9	1	0	0	1.53935	1.44997	3.29971	0.417163	0	0	2.09635	0.139054	3.91416	0.000413038	0.00871733	UP
Potri.009G085600	ATPSK3 (FORMER SYMBOL),ATPSK4,PSK4	phytosulfokine 4 precursor	GO:0005576|GO:0008283|GO:0005515|GO:0008083	extracellular region|cell proliferation|protein binding|growth factor activity	-	-	-	-	Chr09:8015348-8015765	19	23	14	6	11	5	6.1651	7.02974	4.32775	2.11131	3.21954	1.2999	5.84087	2.21025	1.40197	0.000416437	0.00876382	UP
Potri.002G250050	-	-	-	-	-	-	-	-	Chr02:24058841-24058974	17	21	57	6	7	17	13.9143	16.1893	44.4462	5.32554	5.16787	11.1479	24.8499	7.21378	1.78441	0.000426332	0.00890158	UP
Potri.008G046300	-	-	-	-	-	-	-	-	Chr08:2705205-2705847	12	15	17	3	8	5	2.04689	2.4099	2.76251	0.554917	1.23083	0.683305	2.40643	0.823016	1.5479	0.000431616	0.00899491	UP
Potri.003G021400	NAP1;2,NFA02,NFA2	nucleosome assembly protein 1;2	GO:0005622|GO:0043231|GO:0006461|GO:0051276|GO:0005634|GO:0006333|GO:0006334	intracellular|intracellular membrane-bounded organelle|protein complex assembly|chromosome organization|nucleus|chromatin assembly or disassembly|nucleosome assembly	-	-	-	-	Chr03:2564776-2566966	13	16	21	3	2	12	1.21138	1.40429	1.86426	0.303153	0.168102	0.895885	1.49331	0.455713	1.71231	0.000453145	0.00937809	UP
Potri.002G017400	-	RING/U-box superfamily protein	GO:0005515|GO:0043169|GO:0046872|GO:0008270	protein binding|cation binding|metal ion binding|zinc ion binding	-	-	-	-	Chr02:1014744-1015318	26	20	15	34	54	41	2.76853	2.00591	1.52167	3.92604	5.1865	3.4979	2.09871	4.20348	-1.00208	0.000457381	0.0094461	DOWN
Potri.014G168000	-	ATPase subunit 6-1	GO:0005215|GO:0008152|GO:0044237|GO:0022857|GO:0071704|GO:0009058|GO:0006807|GO:0044238|GO:0055085|GO:0006139|GO:0006725|GO:0006810|GO:0009116|GO:0034220|GO:1901137|GO:0006796|GO:0006811|GO:0009165|GO:0006812|GO:0015992|GO:0008324|GO:0006164|GO:0046034|GO:0015078|GO:0015986|GO:0006754	transporter activity|metabolic process|cellular metabolic process|transmembrane transporter activity|organic substance metabolic process|biosynthetic process|nitrogen compound metabolic process|primary metabolic process|transmembrane transport|nucleobase-containing compound metabolic process|cellular aromatic compound metabolic process|transport|nucleoside metabolic process|ion transmembrane tran…	K02126	F-type H+-transporting ATPase subunit a[-]	ko01100|ko01100|ko00190	Metabolic pathways|Metabolic pathways|Oxidative phosphorylation	Chr14:13425550-13426859	66	88	195	36	33	83	15.1753	19.0584	42.7153	8.97639	6.84406	15.2905	25.6497	10.3703	1.30648	0.000474522	0.0097194	UP
Potri.004G006300	-	-	-	-	-	-	-	-	Chr04:413484-416138	6	11	11	2	2	2	2.77641	4.79462	4.84974	1.00388	0.834833	0.74146	4.14026	0.860058	2.26721	0.000477793	0.00977969	UP
Potri.001G172300	-	LRR and NB-ARC domains-containing disease resistance protein	GO:0000166|GO:0001882|GO:0032549|GO:0043531	nucleotide binding|nucleoside binding|ribonucleoside binding|ADP binding	-	-	-	-	Chr01:14589779-14593654	44	35	34	17	26	15	1.54079	1.15443	1.13429	0.645543	0.821239	0.420848	1.2765	0.62921	1.02058	0.000494086	0.0100238	UP
Potri.013G137300	-	photosynthetic electron transfer B	GO:0008152|GO:0016020|GO:0044237|GO:0022900|GO:0055114|GO:0022904	metabolic process|membrane|cellular metabolic process|electron transport chain|oxidation-reduction process|respiratory electron transport chain	-	-	-	-	Chr13:14684272-14685457	50	69	166	22	40	59	4.62374	6.01015	14.6249	2.20622	3.33652	4.37147	8.41959	3.30474	1.34922	0.000507372	0.0102585	UP
Potri.001G233600	-	CCT motif family protein	GO:0005515	protein binding	-	-	-	-	Chr01:24557303-24562120	0	0	0	5	2	6	0	0	0	0.0709365	0.0235992	0.062891	0	0.0524755	#NAME?	0.000508883	0.0102747	DOWN
Potri.001G256700	-	myosin-related	-	-	-	-	-	-	Chr01:26635186-26639925	9	8	3	2	0	0	0.384376	0.32184	0.122084	0.092648	0	0	0.2761	0.0308827	3.16032	0.000514233	0.0103446	UP
Potri.019G001500	-	Protein of unknown function (DUF668)	-	-	-	-	-	-	Chr19:214896-221193	16	10	16	4	5	5	0.472627	0.278224	0.450274	0.128118	0.133218	0.118332	0.400375	0.126556	1.66158	0.000530252	0.0106061	UP
Potri.008G170800	arpc2b	actin-related protein C2B	GO:0005622|GO:0005885|GO:0006461|GO:0030036|GO:0005856|GO:0007010|GO:0007015|GO:0015629|GO:0030833|GO:0045010|GO:0030041|GO:0034314	intracellular|Arp2/3 protein complex|protein complex assembly|actin cytoskeleton organization|cytoskeleton|cytoskeleton organization|actin filament organization|actin cytoskeleton|regulation of actin filament polymerization|actin nucleation|actin filament polymerization|Arp2/3 complex-mediated actin nucleation	K05758	actin related protein 2/3 complex, subunit 2[-]	ko04144|ko04810	Endocytosis|Regulation of actin cytoskeleton	Chr08:11668806-11673056	14	8	8	18	25	30	0.369808	0.199057	0.201319	0.515624	0.595663	0.634921	0.256728	0.582069	-1.18095	0.000533345	0.0106608	DOWN
Potri.008G078300	-	-	-	-	-	-	-	-	Chr08:4857139-4857569	71	71	184	23	25	81	18.0672	17.0179	44.6075	6.34678	5.73827	16.5145	26.5642	9.53319	1.47845	0.00054163	0.0107759	UP
Potri.011G146900	NIP5;1,NLM6,NLM8	NOD26-like intrinsic protein 5;1	GO:0005215|GO:0016020|GO:0006810	transporter activity|membrane|transport	-	-	-	-	Chr11:16641656-16646830	8	11	9	20	30	20	0.25822	0.33441	0.276757	0.700015	0.873406	0.517204	0.289796	0.696875	-1.26586	0.000548263	0.0108789	DOWN
Potri.002G128900	ATMYB73,MYB73	myb domain protein 73	-	-	-	-	-	-	Chr02:9651280-9652279	9	5	5	0	0	2	0.987079	0.516523	0.522481	0	0	0.175726	0.675361	0.0585754	3.52729	0.000555851	0.0110148	UP
Potri.006G103900	ATFER1,FER1	ferretin 1	GO:0043169|GO:0006810|GO:0006811|GO:0046872|GO:0006812|GO:0006873|GO:0030001|GO:0005506|GO:0008199|GO:0006826|GO:0006879	cation binding|transport|ion transport|metal ion binding|cation transport|cellular ion homeostasis|metal ion transport|iron ion binding|ferric iron binding|iron ion transport|cellular iron ion homeostasis	K00522	ferritin heavy chain[1.16.3.2]	ko04217|ko04216	Necroptosis|Ferroptosis	Chr06:8011596-8013689	17	25	24	8	9	13	2.15053	2.97879	2.89244	1.09751	1.02693	1.31761	2.67392	1.14735	1.22065	0.000568418	0.0111801	UP
Potri.011G018900	-	-	-	-	-	-	-	-	Chr11:1581941-1585060	2	4	7	0	0	0	0.150614	0.28382	0.502369	0	0	0	0.312268	0	Inf	0.000569993	0.0111801	UP
Potri.001G446650	-	NB-ARC domain-containing disease resistance protein	GO:0000166|GO:0001882|GO:0032549|GO:0005524	nucleotide binding|nucleoside binding|ribonucleoside binding|ATP binding	-	-	-	-	Chr01:47942630-47948008	9	9	0	0	0	0	0.207981	0.195905	0	0	0	0	0.134629	0	Inf	0.000576067	0.011288	UP
Potri.003G014000	-	-	-	-	-	-	-	-	Chr03:1642538-1645265	413	101	111	10	99	11	8.46019	1.9488	2.16626	0.222138	1.82926	0.180546	4.19175	0.743981	2.49422	0.000578668	0.0113166	UP
Potri.013G136700	-	photosynthetic electron transfer B	GO:0008152|GO:0016020|GO:0044237|GO:0022900|GO:0055114|GO:0022904	metabolic process|membrane|cellular metabolic process|electron transport chain|oxidation-reduction process|respiratory electron transport chain	-	-	-	-	Chr13:14668397-14668908	32	50	99	21	27	33	6.85469	10.0883	20.2038	4.87828	5.21689	5.66373	12.3823	5.25297	1.23707	0.000586131	0.0114028	UP
Potri.017G050000	-	-	-	-	-	-	-	-	Chr17:4172805-4174880	7	7	10	0	0	5	1.02099	0.961548	1.38942	0	0	0.584262	1.12399	0.194754	2.5289	0.000592043	0.0115103	UP
Potri.014G188300	-	photosystem II reaction center protein C	GO:0008152|GO:0016020|GO:0044237|GO:0005622|GO:0022900|GO:0009579|GO:0055114|GO:0015979|GO:0009521|GO:0016168|GO:0009767|GO:0019684	metabolic process|membrane|cellular metabolic process|intracellular|electron transport chain|thylakoid|oxidation-reduction process|photosynthesis|photosystem|chlorophyll binding|photosynthetic electron transport chain|photosynthesis, light reaction	K02705	photosystem II CP43 chlorophyll apoprotein[-]	ko01100|ko01100|ko00195	Metabolic pathways|Metabolic pathways|Photosynthesis	Chr14:16986106-16986850	17	10	43	4	4	11	2.79957	1.55112	6.74625	0.714269	0.594161	1.45142	3.69898	0.919948	2.0075	0.000601385	0.0116331	UP
Potri.001G270600	CYP87A2	cytochrome P450, family 87, subfamily A, polypeptide 2	GO:0003824|GO:0008152|GO:0016491|GO:0016705|GO:0055114|GO:0043169|GO:0020037|GO:0046872|GO:0005506	catalytic activity|metabolic process|oxidoreductase activity|oxidoreductase activity, acting on paired donors, with incorporation or reduction of molecular oxygen|oxidation-reduction process|cation binding|heme binding|metal ion binding|iron ion binding	-	-	-	-	Chr01:27796231-27798838	8	7	12	2	0	4	0.552191	0.455056	0.789057	0.149729	0	0.221178	0.598768	0.123636	2.2759	0.000604475	0.0116684	UP
Potri.018G085700	-	Integrase-type DNA-binding superfamily protein	GO:0008152|GO:0044237|GO:0003700|GO:0071704|GO:0009058|GO:0006807|GO:0044238|GO:0006139|GO:0006725|GO:0016070|GO:0010468|GO:0009059|GO:0006351|GO:0006355	metabolic process|cellular metabolic process|transcription factor activity, sequence-specific DNA binding|organic substance metabolic process|biosynthetic process|nitrogen compound metabolic process|primary metabolic process|nucleobase-containing compound metabolic process|cellular aromatic compound metabolic process|RNA metabolic process|regulation of gene expression|macromolecule biosynthetic p…	-	-	-	-	Chr18:11254815-11255788	3	1	2	9	9	9	0.337853	0.106038	0.214547	1.09901	0.914117	0.811927	0.219479	0.941684	-2.10116	0.000615396	0.0118686	DOWN
Potri.002G062700	PAB3	poly(A) binding protein 3	GO:0003676|GO:0003723	nucleic acid binding|RNA binding	K13126	polyadenylate-binding protein[-]	-	-	Chr02:4230870-4234962	21	22	14	7	11	4	1.18296	1.16732	0.7513	0.427588	0.558914	0.18051	1.03386	0.389004	1.41018	0.000634567	0.0121177	UP
Potri.014G077400	-	-	-	-	-	-	-	-	Chr14:6234516-6237199	8	11	13	3	2	4	0.520731	0.674377	0.806146	0.211758	0.117422	0.208577	0.667085	0.179252	1.89588	0.000634651	0.0121177	UP
Potri.011G075000	-	Chloroplast Ycf2;ATPase, AAA type, core	-	-	-	-	-	-	Chr11:7215822-7217613	122	132	330	52	71	150	9.38316	9.56269	24.1803	4.33709	4.92558	9.24337	14.3754	6.16868	1.22057	0.000642187	0.0122402	UP
Potri.018G019300	ATCM2,CM2	chorismate mutase 2	GO:0003824|GO:0008152|GO:0044237|GO:0016853|GO:0071704|GO:0009058|GO:0006807|GO:0044238|GO:0016866|GO:0006725|GO:0006520|GO:0009072|GO:0004106|GO:0008652|GO:0019752|GO:0009073	catalytic activity|metabolic process|cellular metabolic process|isomerase activity|organic substance metabolic process|biosynthetic process|nitrogen compound metabolic process|primary metabolic process|intramolecular transferase activity|cellular aromatic compound metabolic process|cellular amino acid metabolic process|aromatic amino acid family metabolic process|chorismate mutase activity|cellul…	K01850	chorismate mutase[5.4.99.5]	ko01100|ko01100|ko01110|ko01130|ko01230|ko00400	Metabolic pathways|Metabolic pathways|Biosynthesis of secondary metabolites|Biosynthesis of antibiotics|Biosynthesis of amino acids|Phenylalanine, tyrosine and tryptophan biosynthesis	Chr18:1463957-1466926	18	16	17	3	8	10	1.39615	1.16892	1.25622	0.252342	0.559704	0.62145	1.27376	0.477832	1.41452	0.000645746	0.0122902	UP
Potri.001G077900	-	-	GO:0008152|GO:0044237|GO:0003700|GO:0071704|GO:0009058|GO:0006807|GO:0044238|GO:0003676|GO:0006139|GO:0006725|GO:0016070|GO:0003677|GO:0010468|GO:0009059|GO:0006351|GO:0043565|GO:0006355	metabolic process|cellular metabolic process|transcription factor activity, sequence-specific DNA binding|organic substance metabolic process|biosynthetic process|nitrogen compound metabolic process|primary metabolic process|nucleic acid binding|nucleobase-containing compound metabolic process|cellular aromatic compound metabolic process|RNA metabolic process|DNA binding|regulation of gene expres…	-	-	-	-	Chr01:6160227-6163093	10	10	7	3	1	2	1.46817	1.38293	0.979183	0.477659	0.132433	0.235242	1.27676	0.281778	2.17986	0.000652939	0.0124112	UP
Potri.010G044200	-	SOUL heme-binding family protein	-	-	-	-	-	-	Chr10:7494474-7495255	12	13	18	4	7	4	1.86688	1.90497	2.66785	0.674756	0.982261	0.498514	2.14657	0.71851	1.57895	0.00066391	0.0126118	UP
Potri.T073632	-	disease resistance protein (TIR-NBS-LRR class), putative	GO:0005515|GO:0051716|GO:0000166|GO:0001882|GO:0007165|GO:0032549|GO:0043531	protein binding|cellular response to stimulus|nucleotide binding|nucleoside binding|signal transduction|ribonucleoside binding|ADP binding	-	-	-	-	scaffold_80:24892-29679	15	18	31	6	10	10	1.59873	1.80712	3.1479	0.693511	0.961397	0.853965	2.18458	0.836291	1.38528	0.00068321	0.012929	UP
Potri.005G097700	ASML2	activator of spomin::LUC2	GO:0005515	protein binding	-	-	-	-	Chr05:7383725-7385152	30	31	27	16	18	7	3.61572	3.51914	3.10015	2.09115	1.95681	0.675924	3.41167	1.57463	1.11547	0.000717325	0.0134116	UP
Potri.004G144600	-	Peroxidase superfamily protein	GO:0016209|GO:0003824|GO:0008152|GO:0016491|GO:0004601|GO:0006950|GO:0055114|GO:0006979|GO:0020037	antioxidant activity|catalytic activity|metabolic process|oxidoreductase activity|peroxidase activity|response to stress|oxidation-reduction process|response to oxidative stress|heme binding	K00430	peroxidase[1.11.1.7]	ko01100|ko01100|ko01110|ko00940	Metabolic pathways|Metabolic pathways|Biosynthesis of secondary metabolites|Phenylpropanoid biosynthesis	Chr04:16798351-16800478	3	0	2	6	11	9	0.274224	0	0.174141	0.594686	0.906838	0.659014	0.149455	0.720179	-2.26865	0.000726271	0.0135463	DOWN
Potri.005G008500	-	Plant protein of unknown function (DUF247)	-	-	-	-	-	-	Chr05:555477-557015	3	5	4	0	0	0	0.21382	0.335622	0.271564	0	0	0	0.273669	0	Inf	0.000727551	0.0135617	UP
Potri.010G231000	-	peptidoglycan-binding LysM domain-containing protein	-	-	-	-	-	-	Chr10:21275386-21276147	18	18	9	29	32	34	2.59076	2.44033	1.23415	4.52636	4.15445	3.92092	2.08841	4.20058	-1.00818	0.000761709	0.0140666	DOWN
Potri.018G006300	-	Zinc finger protein 622	-	-	-	-	-	-	Chr18:491161-493562	10	7	15	3	0	5	0.86835	0.572513	1.24095	0.282511	0	0.347874	0.893939	0.210128	2.0889	0.000776153	0.014298	UP
Potri.003G176300	ATNCED6,NCED6	nine-cis-epoxycarotenoid dioxygenase 6	-	-	K09840	9-cis-epoxycarotenoid dioxygenase[1.13.11.51]	ko01100|ko01100|ko01110|ko00906	Metabolic pathways|Metabolic pathways|Biosynthesis of secondary metabolites|Carotenoid biosynthesis	Chr03:18470095-18471693	2	2	1	7	17	5	0.137145	0.129181	0.0653809	0.520647	1.05176	0.274775	0.110569	0.615729	-2.47735	0.000778959	0.0143254	DOWN
Potri.014G035400	-	-	-	-	-	-	-	-	Chr14:2905480-2906292	9	7	5	0	0	4	1.21412	0.889402	0.642658	0	0	0.432291	0.915393	0.144097	2.66735	0.0007903	0.0144782	UP
Potri.006G225300	-	protein kinase family protein	GO:0003824|GO:0008152|GO:0044237|GO:0071704|GO:0016740|GO:0044238|GO:0016772|GO:0019538|GO:0016301|GO:0006796|GO:0016773|GO:0006464|GO:0016310|GO:0004672|GO:0006468	catalytic activity|metabolic process|cellular metabolic process|organic substance metabolic process|transferase activity|primary metabolic process|transferase activity, transferring phosphorus-containing groups|protein metabolic process|kinase activity|phosphate-containing compound metabolic process|phosphotransferase activity, alcohol group as acceptor|cellular protein modification process|phosp…	-	-	-	-	Chr06:23703583-23706219	0	0	0	5	3	4	0	0	0	0.322873	0.16112	0.190799	0	0.224931	#NAME?	0.000798406	0.014573	DOWN
Potri.004G005100	-	O-fucosyltransferase family protein	-	-	-	-	-	-	Chr04:329982-335730	3	2	8	0	0	0	0.171569	0.107696	0.435805	0	0	0	0.238357	0	Inf	0.000802227	0.0146248	UP
Potri.011G074600	-	photosynthetic electron transfer D	GO:0003824|GO:0009055|GO:0016020|GO:0016491	catalytic activity|electron carrier activity|membrane|oxidoreductase activity	K02637	cytochrome b6-f complex subunit 4[-]	ko01100|ko01100|ko00195	Metabolic pathways|Metabolic pathways|Photosynthesis	Chr11:7203812-7204270	54	70	153	28	25	69	12.903	15.7548	34.8295	7.25533	5.38822	13.2098	21.1624	8.61778	1.29612	0.000814499	0.0148124	UP
Potri.013G139100	-	-	-	-	-	-	-	-	Chr13:14757219-14757726	4	7	15	0	2	2	1.26068	2.07783	4.50381	0	0.56855	0.50496	2.6141	0.357837	2.86894	0.000832603	0.0150773	UP
Potri.016G047900	-	myb-like HTH transcriptional regulator family protein	-	-	-	-	-	-	Chr16:3044094-3046991	27	25	17	11	12	7	1.28526	1.12093	0.770961	0.567862	0.515249	0.266967	1.05905	0.450026	1.23469	0.000838477	0.0151469	UP
Potri.T074566	-	-	-	-	-	-	-	-	scaffold_81:72329-72679	11	10	40	2	4	9	3.43696	2.94315	11.9074	0.677835	1.12738	2.25304	6.09583	1.35275	2.17193	0.000847554	0.0152555	UP
Potri.003G183500	-	-	-	-	-	-	-	-	Chr03:18980102-18982664	28	35	21	11	17	14	10.2363	12.0522	7.3141	4.36118	5.60591	4.10094	9.86753	4.68934	1.0733	0.000849389	0.0152793	UP
Potri.T172014	-	-	-	-	-	-	-	-	scaffold_181:73804-74460	11	27	22	10	6	6	1.83618	4.2455	3.4989	1.81024	0.90345	0.802554	3.19353	1.17208	1.44608	0.000871659	0.0156328	UP
Potri.011G074800	-	photosystem II reaction center protein H	GO:0008152|GO:0016020|GO:0044237|GO:0005622|GO:0009579|GO:0015979|GO:0009521|GO:0042301|GO:0009523|GO:0050821	metabolic process|membrane|cellular metabolic process|intracellular|thylakoid|photosynthesis|photosystem|phosphate ion binding|photosystem II|protein stabilization	K02709	photosystem II PsbH protein[-]	ko01100|ko01100|ko00195	Metabolic pathways|Metabolic pathways|Photosynthesis	Chr11:7206842-7207063	40	37	131	12	23	42	19.7614	17.2177	61.6576	6.42904	10.2493	16.625	32.8789	11.1011	1.56646	0.000905953	0.0161508	UP
Potri.014G113000	ABCB4,ATPGP4,MDR4,PGP4	ATP binding cassette subfamily B4	GO:0003824|GO:0005215|GO:0016020|GO:0022857|GO:0016787|GO:0016021|GO:0016817|GO:0000166|GO:0001882|GO:0055085|GO:0006810|GO:0032549|GO:0016820|GO:0016818|GO:0016462|GO:0005524|GO:0042626|GO:0016887|GO:0042623	catalytic activity|transporter activity|membrane|transmembrane transporter activity|hydrolase activity|integral component of membrane|hydrolase activity, acting on acid anhydrides|nucleotide binding|nucleoside binding|transmembrane transport|transport|ribonucleoside binding|hydrolase activity, acting on acid anhydrides, catalyzing transmembrane movement of substances|hydrolase activity, acting on…	K05658	ATP-binding cassette, subfamily B (MDR/TAP), member 1[3.6.3.44]	ko02010	ABC transporters	Chr14:8833164-8839946	22	13	16	9	5	5	0.472279	0.262871	0.32724	0.209519	0.0968171	0.0859982	0.35413	0.130778	1.43716	0.000941529	0.0166458	UP
Potri.019G046600	-	-	-	-	-	-	-	-	Chr19:5890188-5892214	15	10	19	4	8	3	0.679227	0.426526	0.819679	0.196409	0.326764	0.108852	0.641811	0.210675	1.60713	0.000946438	0.0167127	UP
Potri.013G143400	-	Chloroplast Ycf2;ATPase, AAA type, core	GO:0005622|GO:0000166|GO:0001882|GO:0005737|GO:0043231|GO:0032549|GO:0009507|GO:0005524	intracellular|nucleotide binding|nucleoside binding|cytoplasm|intracellular membrane-bounded organelle|ribonucleoside binding|chloroplast|ATP binding	-	-	-	-	Chr13:14901898-14907618	149	182	367	47	52	201	2.88212	3.31598	6.76318	0.985883	0.907274	3.11512	4.32043	1.66942	1.37182	0.000954112	0.0168018	UP
Potri.005G087000	RGF9	-	-	-	-	-	-	-	Chr05:6508592-6508958	9	10	11	2	0	7	1.86593	1.95283	2.17275	0.449754	0	1.16274	1.99717	0.537499	1.89362	0.000973134	0.0170831	UP
Potri.001G412500	-	-	-	-	-	-	-	-	Chr01:43727590-43728235	1306	1223	3483	532	538	1652	364.468	321.483	926.039	161.001	135.428	369.384	537.33	221.938	1.27565	0.000996215	0.0174155	UP
Potri.010G096301	POLA2	DNA polymerase alpha 2	GO:0005215|GO:0016020|GO:0022857|GO:0016021	transporter activity|membrane|transmembrane transporter activity|integral component of membrane	-	-	-	-	Chr10:11855514-11856554	2	0	1	2	9	12	0.393706	0	0.187691	0.427145	1.59847	1.8931	0.193799	1.30624	-2.75279	0.000997991	0.0174272	DOWN
Potri.007G009400	-	basic helix-loop-helix (bHLH) DNA-binding superfamily protein	GO:0005515|GO:0046983	protein binding|protein dimerization activity	-	-	-	-	Chr07:738754-741714	4	6	6	10	13	25	0.255216	0.36056	0.364692	0.691871	0.748145	1.27797	0.326823	0.905994	-1.47099	0.00101869	0.0176954	DOWN
Potri.T087700	-	NB-ARC domain-containing disease resistance protein	GO:0000166|GO:0001882|GO:0032549|GO:0043531	nucleotide binding|nucleoside binding|ribonucleoside binding|ADP binding	-	-	-	-	scaffold_104:34319-37228	28	24	24	9	14	17	1.05529	0.852005	0.861767	0.367847	0.475941	0.513341	0.923019	0.452376	1.02884	0.00102069	0.0176978	UP
Potri.001G316300	SNL1	SIN3-like 1	GO:0008152|GO:0044237|GO:0071704|GO:0009058|GO:0006807|GO:0044238|GO:0006139|GO:0006725|GO:0016070|GO:0010468|GO:0009059|GO:0006351|GO:0006355	metabolic process|cellular metabolic process|organic substance metabolic process|biosynthetic process|nitrogen compound metabolic process|primary metabolic process|nucleobase-containing compound metabolic process|cellular aromatic compound metabolic process|RNA metabolic process|regulation of gene expression|macromolecule biosynthetic process|transcription, DNA-templated|regulation of transcripti…	-	-	-	-	Chr01:32166404-32167208	2	1	2	7	10	7	0.326331	0.153691	0.310965	1.23886	1.47214	0.915314	0.263662	1.20877	-2.19678	0.00102341	0.0177053	DOWN
Potri.001G178500	-	Galactose oxidase/kelch repeat superfamily protein	GO:0005515	protein binding	-	-	-	-	Chr01:15379667-15380872	20	15	13	3	10	6	1.81878	1.28488	1.12633	0.295864	0.820296	0.437212	1.41	0.517791	1.44525	0.00102904	0.0177701	UP
Potri.013G108100	-	-	-	-	-	-	-	-	Chr13:12172147-12173486	10	10	6	0	0	6	1.2534	1.18062	0.716464	0	0	0.602603	1.05016	0.200868	2.3863	0.00104644	0.0180098	UP
Potri.002G102100	-	MATE efflux family protein	GO:0005215|GO:0016020|GO:0022857|GO:0055085|GO:0015238|GO:0006810|GO:0006855|GO:0015297	transporter activity|membrane|transmembrane transporter activity|transmembrane transport|drug transmembrane transporter activity|transport|drug transmembrane transport|antiporter activity	-	-	-	-	Chr02:7376415-7379731	17	18	21	3	2	16	1.12455	1.12155	1.32342	0.215206	0.119334	0.848014	1.18984	0.394185	1.59383	0.0010831	0.0185126	UP
Potri.013G144300	DFL2,GH3-10	Auxin-responsive GH3 family protein	-	-	K14487	auxin responsive GH3 gene family[-]	ko04075	Plant hormone signal transduction	Chr13:15016465-15020049	24	22	29	16	10	5	1.18034	1.01918	1.35879	0.85334	0.443622	0.197025	1.18611	0.497996	1.25203	0.0010888	0.0185463	UP
Potri.001G405700	-	Protein of unknown function (DUF300)	-	-	-	-	-	-	Chr01:42819067-42822385	4	2	12	0	1	0	0.209912	0.0988331	0.59991	0	0.0473339	0	0.302885	0.015778	4.26279	0.00111545	0.0189353	UP
Potri.011G120300	ATLAC17,LAC17	laccase 17	GO:0003824|GO:0008152|GO:0016491|GO:0055114|GO:0043169|GO:0046872|GO:0005507	catalytic activity|metabolic process|oxidoreductase activity|oxidation-reduction process|cation binding|metal ion binding|copper ion binding	-	-	-	-	Chr11:14568088-14570511	5	9	7	12	19	25	0.299161	0.507237	0.399045	0.778639	1.02544	1.19849	0.401814	1.00085	-1.31663	0.00112313	0.0190441	DOWN
Potri.T163900	-	S-adenosyl-L-methionine-dependent methyltransferases superfamily protein	GO:0003824|GO:0008152|GO:0016740|GO:0008168	catalytic activity|metabolic process|transferase activity|methyltransferase activity	-	-	-	-	scaffold_821:3053-4002	22	28	16	7	15	4	2.88621	3.46002	1.99984	0.995831	1.77502	0.420397	2.78202	1.06375	1.38698	0.00115566	0.0194873	UP
Potri.017G122200	-	Translation initiation factor IF2/IF5	GO:0008152|GO:0044237|GO:0005515|GO:0071704|GO:0009058|GO:0006807|GO:0044238|GO:0003676|GO:0006413|GO:0019538|GO:0003723|GO:0009059|GO:0006412|GO:0043043|GO:0003743	metabolic process|cellular metabolic process|protein binding|organic substance metabolic process|biosynthetic process|nitrogen compound metabolic process|primary metabolic process|nucleic acid binding|translational initiation|protein metabolic process|RNA binding|macromolecule biosynthetic process|translation|peptide biosynthetic process|translation initiation factor activity	K03262	translation initiation factor 5[-]	ko03013|ko04214	RNA transport|Apoptosis - fly	Chr17:13515423-13518032	39	23	20	891	18	38	0.825113	0.458343	0.403126	20.442	0.343499	0.644135	0.562194	7.14321	-3.66743	0.00116196	0.0195581	DOWN
Potri.008G184000	CYP71B36	cytochrome P450, family 71, subfamily B, polypeptide 36	GO:0003824|GO:0008152|GO:0016491|GO:0016705|GO:0055114|GO:0043169|GO:0020037|GO:0046872|GO:0005506	catalytic activity|metabolic process|oxidoreductase activity|oxidoreductase activity, acting on paired donors, with incorporation or reduction of molecular oxygen|oxidation-reduction process|cation binding|heme binding|metal ion binding|iron ion binding	-	-	-	-	Chr08:12607609-12609864	11	11	16	22	30	29	0.774309	0.729349	1.07309	1.67944	1.9049	1.63567	0.858915	1.74	-1.0185	0.00117155	0.0196721	DOWN
Potri.011G158500	-	FAD-binding Berberine family protein	GO:0003824|GO:0008152|GO:0016491|GO:0048037|GO:0055114|GO:0000166|GO:0050662|GO:0050660	catalytic activity|metabolic process|oxidoreductase activity|cofactor binding|oxidation-reduction process|nucleotide binding|coenzyme binding|flavin adenine dinucleotide binding	-	-	-	-	Chr11:17566383-17568157	12	15	20	8	7	2	0.741492	0.872996	1.17736	0.536081	0.390138	0.0990006	0.930614	0.34174	1.44529	0.00121638	0.0202569	UP
Potri.003G075500	-	Pectin lyase-like superfamily protein	-	-	-	-	-	-	Chr03:10378718-10381371	14	14	17	9	5	0	0.61913	0.583181	0.716247	0.431627	0.199451	0	0.639519	0.210359	1.60413	0.00124819	0.0206599	UP
Potri.009G081800	LRR XI-23,RLK7	Leucine-rich receptor-like protein kinase family protein	GO:0003824|GO:0008152|GO:0044237|GO:0005515|GO:0071704|GO:0016740|GO:0044238|GO:0016772|GO:0000166|GO:0001882|GO:0019538|GO:0016301|GO:0032549|GO:0006796|GO:0016773|GO:0006464|GO:0016310|GO:0005524|GO:0004672|GO:0006468	catalytic activity|metabolic process|cellular metabolic process|protein binding|organic substance metabolic process|transferase activity|primary metabolic process|transferase activity, transferring phosphorus-containing groups|nucleotide binding|nucleoside binding|protein metabolic process|kinase activity|ribonucleoside binding|phosphate-containing compound metabolic process|phosphotransferase ac…	-	-	-	-	Chr09:7762798-7765953	12	6	6	2	3	0	0.430536	0.202749	0.205072	0.0778279	0.0970832	0	0.279452	0.0583037	2.26094	0.00125196	0.0206993	UP
Potri.008G010500	AGO4,OCP11	Argonaute family protein	GO:0005515|GO:0003676	protein binding|nucleic acid binding	-	-	-	-	Chr08:568995-575314	4	7	9	0	0	3	0.113952	0.187814	0.244265	0	0	0.0684776	0.18201	0.0228259	2.99528	0.00127354	0.0209632	UP
Potri.004G152300	ATPLT5,ATPMT5,PMT5	polyol/monosaccharide transporter 5	GO:0005215|GO:0016020|GO:0022857|GO:0016021|GO:0055085|GO:0006810	transporter activity|membrane|transmembrane transporter activity|integral component of membrane|transmembrane transport|transport	-	-	-	-	Chr04:17416629-17418932	20	21	21	8	12	10	1.27378	1.2598	1.27423	0.55258	0.689392	0.510296	1.26927	0.584089	1.11974	0.00129239	0.021233	UP
Potri.018G036700	ATRD22,RD22	BURP domain-containing protein	-	-	-	-	-	-	Chr18:2996388-2998274	10	10	8	17	22	26	0.685454	0.645653	0.522422	1.26365	1.36026	1.42796	0.617843	1.35062	-1.12831	0.00131085	0.0214082	DOWN
Potri.019G128500	ATOFP4,OFP4	ovate family protein 4	GO:0003676|GO:0003677	nucleic acid binding|DNA binding	-	-	-	-	Chr19:15487343-15488563	20	13	33	8	11	6	1.79644	1.09992	2.82405	0.779314	0.891241	0.431841	1.9068	0.700799	1.44408	0.00131134	0.0214082	UP
Potri.010G251900	-	Core-2/I-branching beta-1,6-N-acetylglucosaminyltransferase family protein	-	-	-	-	-	-	Chr10:22355987-22357569	5	4	3	11	12	14	0.781144	0.588664	0.446599	1.86375	1.69107	1.75254	0.605469	1.76912	-1.54691	0.00133525	0.021647	DOWN
Potri.013G141020	-	photosystem II reaction center protein E	GO:0008152|GO:0044237|GO:0015979	metabolic process|cellular metabolic process|photosynthesis	-	-	-	-	Chr13:14830570-14831152	62	50	118	13	32	61	11.6636	8.85974	21.1486	2.65204	5.43	9.19433	13.8907	5.75879	1.27028	0.00133416	0.021647	UP
Potri.003G092100	-	-	-	-	-	-	-	-	Chr03:11920423-11920811	6	7	6	1	0	2	1.69154	1.85883	1.61158	0.305634	0	0.451738	1.72065	0.252457	2.76884	0.00134922	0.0218168	UP
Potri.004G043800	-	Chloroplast Ycf2;ATPase, AAA type, core	-	-	-	-	-	-	Chr04:3309974-3310593	13	12	38	3	7	10	2.29967	1.99956	6.40407	0.575502	1.11693	1.41731	3.56777	1.03658	1.78319	0.00134952	0.0218168	UP
Potri.006G031200	-	-	-	-	-	-	-	-	Chr06:2104561-2109582	24	34	26	16	10	17	0.928782	1.23937	0.958614	0.671471	0.349075	0.527107	1.04226	0.515884	1.01459	0.00134906	0.0218168	UP
Potri.009G141600	anac036,NAC036	NAC domain containing protein 36	GO:0008152|GO:0044237|GO:0071704|GO:0009058|GO:0006807|GO:0044238|GO:0003676|GO:0006139|GO:0006725|GO:0016070|GO:0003677|GO:0010468|GO:0009059|GO:0006351|GO:0006355	metabolic process|cellular metabolic process|organic substance metabolic process|biosynthetic process|nitrogen compound metabolic process|primary metabolic process|nucleic acid binding|nucleobase-containing compound metabolic process|cellular aromatic compound metabolic process|RNA metabolic process|DNA binding|regulation of gene expression|macromolecule biosynthetic process|transcription, DNA-te…	-	-	-	-	Chr09:11274311-11275971	13	23	19	9	5	9	1.45489	2.42454	2.02578	1.09228	0.504733	0.806956	1.9684	0.801323	1.29657	0.0013518	0.0218418	UP
Potri.003G193200	ATST2A,ST2A	sulfotransferase 2A	GO:0003824|GO:0016740|GO:0008146	catalytic activity|transferase activity|sulfotransferase activity	-	-	-	-	Chr03:19705841-19706901	7	2	2	6	15	19	0.723642	0.194685	0.196954	0.672595	1.3986	1.57365	0.371761	1.21495	-1.70845	0.00137821	0.0221247	DOWN
Potri.010G070001	-	-	-	-	-	-	-	-	Chr10:9677307-9680068	29	23	37	14	12	21	2.0375	1.52213	2.47668	1.06664	0.760495	1.18217	2.0121	1.0031	1.00423	0.00137693	0.0221247	UP
Potri.003G220200	RAP2.11	related to AP2 11	GO:0008152|GO:0044237|GO:0003700|GO:0071704|GO:0009058|GO:0006807|GO:0044238|GO:0006139|GO:0006725|GO:0016070|GO:0010468|GO:0009059|GO:0006351|GO:0006355	metabolic process|cellular metabolic process|transcription factor activity, sequence-specific DNA binding|organic substance metabolic process|biosynthetic process|nitrogen compound metabolic process|primary metabolic process|nucleobase-containing compound metabolic process|cellular aromatic compound metabolic process|RNA metabolic process|regulation of gene expression|macromolecule biosynthetic p…	-	-	-	-	Chr03:21551078-21552365	5	3	3	0	0	0	0.425748	0.240653	0.24341	0	0	0	0.30327	0	Inf	0.00144423	0.0229868	UP
Potri.007G005700	ATCYCD1;1,CYCD1;1	CYCLIN D1;1	GO:0005622|GO:0043231|GO:0005634	intracellular|intracellular membrane-bounded organelle|nucleus	-	-	-	-	Chr07:411747-413451	4	7	6	12	15	18	0.358721	0.591238	0.512597	1.167	1.21334	1.29332	0.487519	1.22456	-1.32873	0.00149242	0.0236277	DOWN
Potri.009G019300	-	Pollen Ole e 1 allergen and extensin family protein	-	-	-	-	-	-	Chr09:3106562-3107177	5	6	5	9	21	16	1.01926	1.15205	0.971155	1.98966	3.86149	2.6134	1.04749	2.82152	-1.42953	0.00151304	0.0238656	DOWN
Potri.T110400	-	Cysteine/Histidine-rich C1 domain family protein	GO:0003824|GO:0008152|GO:0016491|GO:0016651|GO:0055114|GO:0047134	catalytic activity|metabolic process|oxidoreductase activity|oxidoreductase activity, acting on NAD(P)H|oxidation-reduction process|protein-disulfide reductase activity	-	-	-	-	scaffold_170:12597-14708	5	4	2	0	0	0	0.283832	0.213893	0.108162	0	0	0	0.201962	0	Inf	0.00154144	0.0242164	UP
Potri.008G121700	-	-	-	-	-	-	-	-	Chr08:7936392-7937724	13	16	6	27	24	27	1.06961	1.23995	0.470297	2.40908	1.78114	1.77986	0.926619	1.99003	-1.10274	0.00154537	0.0242602	DOWN
Potri.005G017300	ATNAS3,NAS3	nicotianamine synthase 3	GO:0003824|GO:0008152|GO:0044237|GO:0071704|GO:0009058|GO:0006807|GO:0016740|GO:0016765|GO:0030410|GO:0009308|GO:0030418|GO:0019752	catalytic activity|metabolic process|cellular metabolic process|organic substance metabolic process|biosynthetic process|nitrogen compound metabolic process|transferase activity|transferase activity, transferring alkyl or aryl (other than methyl) groups|nicotianamine synthase activity|amine metabolic process|nicotianamine biosynthetic process|carboxylic acid metabolic process	-	-	-	-	Chr05:1398998-1400041	33	35	23	11	14	24	3.46671	3.46328	2.30191	1.25321	1.32662	2.02013	3.0773	1.53332	1.00501	0.00155259	0.0243479	UP
Potri.013G136800	-	photosynthetic electron transfer D	-	-	-	-	-	-	Chr13:14667099-14667419	33	34	55	8	13	36	11.2749	10.942	17.9029	2.96431	4.00642	9.85504	13.3733	5.60859	1.25364	0.00155656	0.0243845	UP
Potri.013G112200	-	DWNN domain, a CCHC-type zinc finger	-	-	-	-	-	-	Chr13:12582794-12584100	0	2	1	7	7	5	0	0.158042	0.0799878	0.636966	0.529835	0.336163	0.0793433	0.500988	-2.6586	0.00165191	0.0255828	DOWN
Potri.018G066800	-	-	-	-	-	-	-	-	Chr18:8490023-8490632	10	10	21	1	6	7	1.79791	1.69352	3.5971	0.194904	0.97306	1.00835	2.36284	0.725437	1.7036	0.00168749	0.0259988	UP
Potri.003G122800	IQD22	IQ-domain 22	GO:0005515	protein binding	-	-	-	-	Chr03:14483539-14487732	7	13	9	24	23	20	0.496626	0.868698	0.608291	1.84637	1.47176	1.13678	0.657872	1.48497	-1.17455	0.00173418	0.0266552	DOWN
Potri.001G281900	-	UDP-Glycosyltransferase superfamily protein	GO:0003824|GO:0008152|GO:0016740|GO:0016757|GO:0016758	catalytic activity|metabolic process|transferase activity|transferase activity, transferring glycosyl groups|transferase activity, transferring hexosyl groups	-	-	-	-	Chr01:28830332-28832692	4	7	3	0	1	0	0.28939	0.476968	0.206803	0	0.0652558	0	0.324387	0.0217519	3.8985	0.00174236	0.0267001	UP
Potri.008G103600	-	-	-	-	-	-	-	-	Chr08:6586440-6588105	3	2	6	0	0	0	0.321043	0.201523	0.611616	0	0	0	0.37806	0	Inf	0.00177181	0.027019	UP
Potri.005G154300	-	ribosomal protein L2	GO:0005198|GO:0008152|GO:0044237|GO:0005622|GO:0071704|GO:0009058|GO:0003735|GO:0006807|GO:0044238|GO:0005737|GO:0019538|GO:0005840|GO:0009059|GO:0006412|GO:0043043	structural molecule activity|metabolic process|cellular metabolic process|intracellular|organic substance metabolic process|biosynthetic process|structural constituent of ribosome|nitrogen compound metabolic process|primary metabolic process|cytoplasm|protein metabolic process|ribosome|macromolecule biosynthetic process|translation|peptide biosynthetic process	K02886	large subunit ribosomal protein L2[-]	ko03010	Ribosome	Chr05:14814000-14814410	8	6	111	0	3	12	2.13487	1.50804	28.2194	0	0.7221	2.56559	10.6208	1.0959	3.27671	0.00177393	0.0270375	UP
Potri.008G183200	-	-	-	-	-	-	-	-	Chr08:12521419-12524921	3	4	2	7	15	10	0.130015	0.163272	0.0825637	0.328927	0.586296	0.347187	0.125284	0.420803	-1.74795	0.00182247	0.0276362	DOWN
Potri.003G018700	-	-	-	-	-	-	-	-	Chr03:2260062-2261191	19	17	7	3	3	9	2.06113	1.73714	0.723492	0.352929	0.293554	0.782213	1.50725	0.476232	1.66219	0.00184363	0.0278156	UP
Potri.T122500	-	-	-	-	-	-	-	-	scaffold_207:53697-54968	4	6	10	0	0	4	1.01555	1.43473	2.41862	0	0	0.813547	1.62296	0.271182	2.5813	0.00186618	0.0281133	UP
Potri.006G178700	-	NAD(P)-binding Rossmann-fold superfamily protein	GO:0003824|GO:0048037|GO:0050662	catalytic activity|cofactor binding|coenzyme binding	-	-	-	-	Chr06:19239710-19241659	6	4	1	9	12	14	0.654085	0.410778	0.103921	1.06405	1.18005	1.22294	0.389595	1.15568	-1.5687	0.00188532	0.0282962	DOWN
Potri.013G080500	-	Phosphorylase superfamily protein	GO:0003824|GO:0008152|GO:0044237|GO:0071704|GO:0006807|GO:0044238|GO:0006139|GO:0006725|GO:0009116	catalytic activity|metabolic process|cellular metabolic process|organic substance metabolic process|nitrogen compound metabolic process|primary metabolic process|nucleobase-containing compound metabolic process|cellular aromatic compound metabolic process|nucleoside metabolic process	-	-	-	-	Chr13:7051571-7053149	0	0	0	0	5	9	0	0	0	0	0.478374	0.764814	0	0.414396	#NAME?	0.0019142	0.0286344	DOWN
Potri.009G003200	-	PLATZ transcription factor family protein	GO:0005622|GO:0043169|GO:0046872|GO:0008270	intracellular|cation binding|metal ion binding|zinc ion binding	-	-	-	-	Chr09:762633-763910	6	6	7	15	12	23	0.830821	0.78258	0.923548	2.2526	1.49891	2.55189	0.84565	2.10113	-1.31304	0.00206139	0.0304243	DOWN
Potri.011G075100	-	NADH-Ubiquinone/plastoquinone (complex I) protein	-	-	K05573|K02992	NAD(P)H-quinone oxidoreductase subunit 2[1.6.5.3]|small subunit ribosomal protein S7[-]	ko01100|ko01100|ko03010|ko00190	Metabolic pathways|Metabolic pathways|Ribosome|Oxidative phosphorylation	Chr11:7230312-7232353	49	51	88	15	15	58	4.10237	4.02185	7.01907	1.36188	1.13276	3.89058	5.04776	2.1284	1.24587	0.00207333	0.0305855	UP
Potri.001G150800	UGLYAH	ureidoglycine aminohydrolase	-	-	-	-	-	-	Chr01:12434523-12438745	10	6	5	2	2	0	1.43363	0.8102	0.682982	0.311006	0.258635	0	0.975604	0.18988	2.3612	0.00213057	0.0312808	UP
Potri.002G177500	-	S-adenosyl-L-methionine-dependent methyltransferases superfamily protein	-	-	-	-	-	-	Chr02:13687938-13689298	10	6	2	15	20	15	0.805824	0.455403	0.153541	1.31084	1.45375	0.968475	0.471589	1.24436	-1.3998	0.00221581	0.0321939	DOWN
Potri.003G022200	-	-	-	-	-	-	-	-	Chr03:2669085-2669572	13	16	29	2	7	14	2.92171	3.38699	6.20923	0.487541	1.41905	2.52107	4.17264	1.47589	1.49938	0.00222942	0.0323131	UP
Potri.009G044800	-	Carbohydrate-binding-like fold	GO:0003824|GO:0030246|GO:0030247|GO:2001070	catalytic activity|carbohydrate binding|polysaccharide binding|starch binding	-	-	-	-	Chr09:5097983-5100352	23	18	20	7	8	15	1.32485	0.976644	1.09759	0.437245	0.415663	0.692277	1.13303	0.515062	1.13737	0.00235775	0.0337418	UP
Potri.012G089500	OLD5,QS,SUFE3	quinolinate synthase	-	-	K03517	quinolinate synthase[2.5.1.72]	ko01100|ko01100|ko00760	Metabolic pathways|Metabolic pathways|Nicotinate and nicotinamide metabolism	Chr12:11637605-11639789	14	22	19	5	10	11	0.643521	0.952545	0.832046	0.249259	0.414618	0.405131	0.809371	0.356336	1.18356	0.00236309	0.0337747	UP
Potri.001G427100	-	NB-ARC domain-containing disease resistance protein	GO:0000166|GO:0001882|GO:0032549|GO:0043531	nucleotide binding|nucleoside binding|ribonucleoside binding|ADP binding	-	-	-	-	Chr01:45471970-45475449	16	20	32	8	7	16	0.815836	0.960526	1.55445	0.442372	0.321941	0.653653	1.11027	0.472655	1.23205	0.0023741	0.0338913	UP
Potri.007G031800	-	PQ-loop repeat family protein / transmembrane family protein	-	-	-	-	-	-	Chr07:2415745-2419192	0	3	5	10	7	13	0	0.127556	0.215013	0.489435	0.284977	0.470111	0.11419	0.414841	-1.86113	0.00237427	0.0338913	DOWN
Potri.002G183900	-	Protein of unknown function (DUF3754)	-	-	-	-	-	-	Chr02:14367145-14370706	17	22	30	7	9	18	1.00567	1.22587	1.69075	0.449037	0.480232	0.853147	1.30743	0.594138	1.13786	0.00239509	0.0341503	UP
Potri.012G038500	ATHDG11,EDT1,HDG11	homeodomain GLABROUS 11	GO:0008289|GO:0003676|GO:0003677	lipid binding|nucleic acid binding|DNA binding	-	-	-	-	Chr12:3400094-3403245	26	23	8	9	7	3	1.33501	1.11238	0.391327	0.50114	0.324201	0.123426	0.946242	0.316256	1.58112	0.00240849	0.0342759	UP
Potri.008G036900	-	Cysteine proteinases superfamily protein	-	-	-	-	-	-	Chr08:2068013-2070675	16	19	19	6	8	12	2.47164	2.76452	2.79614	1.0051	1.11468	1.48515	2.67743	1.20164	1.15584	0.00242248	0.034393	UP
Potri.009G098700	-	Leucine-rich repeat (LRR) family protein	-	-	-	-	-	-	Chr09:8802643-8803937	15	6	9	4	4	0	1.27034	0.478613	0.726192	0.367338	0.305568	0	0.825048	0.224302	1.87903	0.00248543	0.0350368	UP
Potri.010G080332	-	NADH dehydrogenase subunit 4	-	-	K03881	NADH-ubiquinone oxidoreductase chain 4[1.6.5.3]	ko01100|ko01100|ko00190	Metabolic pathways|Metabolic pathways|Oxidative phosphorylation	Chr10:10600606-10600810	40	31	93	15	8	41	21.4001	15.6215	47.4022	8.70272	3.8606	17.5748	28.1413	10.046	1.48606	0.00254509	0.0356923	UP
Potri.014G015300	-	-	-	-	-	-	-	-	Chr14:1502482-1503678	8	5	8	10	22	22	0.733026	0.431514	0.698308	0.993589	1.81822	1.61503	0.620949	1.47561	-1.24877	0.00260129	0.0363438	DOWN
Potri.005G147000	ACA2	calcium ATPase 2	GO:0000166|GO:0043169|GO:0046872	nucleotide binding|cation binding|metal ion binding	-	-	-	-	Chr05:12944573-12948172	3	3	4	0	0	0	0.15897	0.14974	0.201902	0	0	0	0.170204	0	Inf	0.00261593	0.0365029	UP
Potri.004G093000	-	-	-	-	-	-	-	-	Chr04:7873155-7873692	5	4	4	1	0	0	1.01926	0.768108	0.776835	0.220988	0	0	0.854735	0.0736627	3.53647	0.00261894	0.0365219	UP
Potri.004G122500	ARC12,ATMINE1,MINE1	homologue of bacterial MinE 1	GO:0051301|GO:0007049|GO:0051726|GO:0000278|GO:0032955|GO:0032465|GO:0000910	cell division|cell cycle|regulation of cell cycle|mitotic cell cycle|regulation of barrier septum assembly|regulation of cytokinesis|cytokinesis	-	-	-	-	Chr04:11627988-11629669	6	6	8	1	3	0	0.871536	0.820932	1.10712	0.157472	0.39309	0	0.933195	0.183521	2.34623	0.00262444	0.0365645	UP
Potri.016G038400	-	Pentatricopeptide repeat (PPR) superfamily protein	-	-	-	-	-	-	Chr16:2361854-2364020	21	44	34	12	9	28	1.06286	2.09757	1.6394	0.658628	0.410867	1.13542	1.59994	0.734973	1.12226	0.00265888	0.0369753	UP
Potri.014G012800	AtGRF1,GRF1	growth-regulating factor 1	GO:0032502|GO:0008152|GO:0044237|GO:0005622|GO:0071704|GO:0009058|GO:0006807|GO:0044238|GO:0000166|GO:0001882|GO:0006139|GO:0006725|GO:0043231|GO:0016070|GO:0032549|GO:0010468|GO:0005634|GO:0009059|GO:0006351|GO:0006355|GO:0005524	developmental process|metabolic process|cellular metabolic process|intracellular|organic substance metabolic process|biosynthetic process|nitrogen compound metabolic process|primary metabolic process|nucleotide binding|nucleoside binding|nucleobase-containing compound metabolic process|cellular aromatic compound metabolic process|intracellular membrane-bounded organelle|RNA metabolic process|ribo…	-	-	-	-	Chr14:1330790-1334390	8	7	16	20	23	26	0.418024	0.34449	0.796507	1.13323	1.08401	1.08849	0.519673	1.10191	-1.08433	0.00266252	0.0370087	DOWN
Potri.004G231100	-	-	GO:0003824|GO:0008152|GO:0016740|GO:0008168	catalytic activity|metabolic process|transferase activity|methyltransferase activity	-	-	-	-	Chr04:23631301-23632653	10	21	15	4	4	11	0.810588	1.60338	1.15841	0.351591	0.292469	0.714444	1.19079	0.452835	1.39486	0.00272648	0.0377045	UP
Potri.014G160100	-	GDSL-like Lipase/Acylhydrolase superfamily protein	GO:0003824|GO:0016787|GO:0016788	catalytic activity|hydrolase activity|hydrolase activity, acting on ester bonds	-	-	-	-	Chr14:12579577-12582186	0	0	0	4	3	3	0	0	0	0.402116	0.250873	0.222856	0	0.291949	#NAME?	0.00274152	0.0378774	DOWN
Potri.017G076900	-	Major facilitator superfamily protein	GO:0005215|GO:0016020|GO:0006810	transporter activity|membrane|transport	-	-	-	-	Chr17:9029363-9030353	6	6	0	0	0	0	1.1248	1.05949	0	0	0	0	0.728099	0	Inf	0.00276814	0.0381922	UP
Potri.017G013400	SOM	Zinc finger C-x8-C-x5-C-x3-H type family protein	GO:0043169|GO:0046872	cation binding|metal ion binding	-	-	-	-	Chr17:1116989-1118240	3	1	3	5	9	13	0.262834	0.0824925	0.250409	0.475025	0.711142	0.912435	0.198579	0.699534	-1.81668	0.00277616	0.0382851	DOWN
Potri.004G126000	UGT88A1	UDP-glucosyl transferase 88A1	GO:0003824|GO:0008152|GO:0016740|GO:0016757|GO:0016758	catalytic activity|metabolic process|transferase activity|transferase activity, transferring glycosyl groups|transferase activity, transferring hexosyl groups	-	-	-	-	Chr04:12159703-12161088	1	0	2	4	9	6	0.0791104	0	0.150771	0.34322	0.642388	0.380431	0.0766272	0.455346	-2.57104	0.00281884	0.0387922	DOWN
Potri.011G038000	-	S-locus lectin protein kinase family protein	GO:0003824|GO:0008152|GO:0044237|GO:0071704|GO:0016740|GO:0044238|GO:0016772|GO:0048544|GO:0019538|GO:0016301|GO:0006796|GO:0016773|GO:0006464|GO:0016310|GO:0004672|GO:0006468	catalytic activity|metabolic process|cellular metabolic process|organic substance metabolic process|transferase activity|primary metabolic process|transferase activity, transferring phosphorus-containing groups|recognition of pollen|protein metabolic process|kinase activity|phosphate-containing compound metabolic process|phosphotransferase activity, alcohol group as acceptor|cellular protein modi…	-	-	-	-	Chr11:3218366-3222009	0	0	0	3	2	5	0	0	0	0.139162	0.0771667	0.171359	0	0.129229	#NAME?	0.00281943	0.0387922	DOWN
Potri.004G191900	WAK2	wall-associated kinase 2	GO:0003824|GO:0008152|GO:0044237|GO:0030246|GO:0071704|GO:0016740|GO:0044238|GO:0016772|GO:0030247|GO:0000166|GO:0001882|GO:0043169|GO:0019538|GO:0016301|GO:0032549|GO:0006796|GO:0016773|GO:0046872|GO:0006464|GO:0016310|GO:0005509|GO:0005524|GO:0004672|GO:0006468	catalytic activity|metabolic process|cellular metabolic process|carbohydrate binding|organic substance metabolic process|transferase activity|primary metabolic process|transferase activity, transferring phosphorus-containing groups|polysaccharide binding|nucleotide binding|nucleoside binding|cation binding|protein metabolic process|kinase activity|ribonucleoside binding|phosphate-containing compo…	-	-	-	-	Chr04:20608772-20612217	19	14	10	3	7	8	0.914752	0.634894	0.458667	0.156634	0.303992	0.308606	0.669437	0.256411	1.38449	0.00283113	0.0388993	UP
Potri.002G038500	ATMYB14,MYB14,MYB14AT	myb domain protein 14	-	-	-	-	-	-	Chr02:2475887-2477863	7	3	1	0	0	0	0.650114	0.262457	0.0885216	0	0	0	0.333697	0	Inf	0.00283278	0.0389041	UP
Potri.001G218800	anac061,NAC061	NAC domain containing protein 61	GO:0008152|GO:0044237|GO:0071704|GO:0009058|GO:0006807|GO:0044238|GO:0003676|GO:0006139|GO:0006725|GO:0016070|GO:0003677|GO:0010468|GO:0009059|GO:0006351|GO:0006355	metabolic process|cellular metabolic process|organic substance metabolic process|biosynthetic process|nitrogen compound metabolic process|primary metabolic process|nucleic acid binding|nucleobase-containing compound metabolic process|cellular aromatic compound metabolic process|RNA metabolic process|DNA binding|regulation of gene expression|macromolecule biosynthetic process|transcription, DNA-te…	-	-	-	-	Chr01:22466572-22467761	5	8	3	2	0	0	0.586484	0.88394	0.335308	0.25446	0	0	0.601911	0.0848199	2.82707	0.00283723	0.0389473	UP
Potri.003G204600	AAC2	ADP/ATP carrier 2	-	-	K05863	solute carrier family 25 (mitochondrial adenine nucleotide translocator), member 4/5/6/31[-]	ko04218|ko04217|ko04020|ko04022	Cellular senescence|Necroptosis|Calcium signaling pathway|cGMP-PKG signaling pathway	Chr03:20569417-20572070	7	6	10	14	14	31	0.309715	0.250021	0.421478	0.671654	0.558688	1.09887	0.327072	0.776405	-1.2472	0.00284007	0.0389569	DOWN
Potri.016G043400	GPDHC1	6-phosphogluconate dehydrogenase family protein	GO:0003824|GO:0008152|GO:0044237|GO:0016491|GO:0005622|GO:0048037|GO:0071704|GO:0044238|GO:0005975|GO:0055114|GO:0016614|GO:0000166|GO:0050662|GO:0005737|GO:0009331|GO:0016616|GO:0006796|GO:0051287|GO:0004367|GO:0046168|GO:0006072	catalytic activity|metabolic process|cellular metabolic process|oxidoreductase activity|intracellular|cofactor binding|organic substance metabolic process|primary metabolic process|carbohydrate metabolic process|oxidation-reduction process|oxidoreductase activity, acting on CH-OH group of donors|nucleotide binding|coenzyme binding|cytoplasm|glycerol-3-phosphate dehydrogenase complex|oxidoreductas…	K00006	glycerol-3-phosphate dehydrogenase (NAD+)[1.1.1.8]	ko01110|ko00564|ko04011	Biosynthesis of secondary metabolites|Glycerophospholipid metabolism|MAPK signaling pathway - yeast	Chr16:2696067-2700066	21	14	15	6	10	7	1.06237	0.667107	0.722936	0.329162	0.456309	0.283714	0.817472	0.356395	1.19769	0.00288821	0.0394451	UP
Potri.003G150000	-	Leucine-rich repeat protein kinase family protein	GO:0003824|GO:0008152|GO:0044237|GO:0005515|GO:0071704|GO:0016740|GO:0044238|GO:0016772|GO:0000166|GO:0001882|GO:0019538|GO:0016301|GO:0032549|GO:0006796|GO:0016773|GO:0006464|GO:0016310|GO:0005524|GO:0004672|GO:0006468	catalytic activity|metabolic process|cellular metabolic process|protein binding|organic substance metabolic process|transferase activity|primary metabolic process|transferase activity, transferring phosphorus-containing groups|nucleotide binding|nucleoside binding|protein metabolic process|kinase activity|ribonucleoside binding|phosphate-containing compound metabolic process|phosphotransferase ac…	-	-	-	-	Chr03:16428369-16432851	11	12	23	6	5	8	0.339345	0.348728	0.676005	0.200738	0.139139	0.197751	0.454693	0.179209	1.34325	0.00291101	0.0396544	UP
Potri.003G014500	-	Basic-leucine zipper (bZIP) transcription factor family protein	-	-	-	-	-	-	Chr03:1829986-1830775	2	3	5	0	0	0	0.761438	1.07626	1.81417	0	0	0	1.21729	0	Inf	0.00293631	0.0398492	UP
Potri.019G073400	MMP	matrix metalloproteinase	GO:0003824|GO:0008152|GO:0031012|GO:0071704|GO:0016787|GO:0044238|GO:0043169|GO:0008233|GO:0019538|GO:0006508|GO:0046872|GO:0008237|GO:0004175|GO:0008270|GO:0004222	catalytic activity|metabolic process|extracellular matrix|organic substance metabolic process|hydrolase activity|primary metabolic process|cation binding|peptidase activity|protein metabolic process|proteolysis|metal ion binding|metallopeptidase activity|endopeptidase activity|zinc ion binding|metalloendopeptidase activity	-	-	-	-	Chr19:10714921-10715888	2	3	5	0	0	0	0.226544	0.320208	0.539753	0	0	0	0.362168	0	Inf	0.00293528	0.0398492	UP
Potri.007G007000	-	-	-	-	-	-	-	-	Chr07:486625-487133	1	5	3	6	9	18	0.215417	1.01478	0.615938	1.40201	1.74921	3.10753	0.615378	2.08625	-1.76137	0.0029565	0.0399777	DOWN
Potri.016G048000	-	myb-like HTH transcriptional regulator family protein	-	-	-	-	-	-	Chr16:3048826-3049937	3	2	5	0	0	0	0.207614	0.130322	0.329641	0	0	0	0.222526	0	Inf	0.00295859	0.0399879	UP
Potri.012G051900	-	MATE efflux family protein	GO:0005215|GO:0016020|GO:0022857|GO:0055085|GO:0015238|GO:0006810|GO:0006855|GO:0015297	transporter activity|membrane|transmembrane transporter activity|transmembrane transport|drug transmembrane transporter activity|transport|drug transmembrane transport|antiporter activity	-	-	-	-	Chr12:5086958-5091805	12	13	6	19	26	23	0.314642	0.321063	0.14987	0.540225	0.614899	0.48317	0.261858	0.546098	-1.06037	0.00296348	0.0400358	DOWN
Potri.019G013800	ATXIE,XIE	Myosin family protein with Dil domain	GO:0003824|GO:0005622|GO:0005515|GO:0016787|GO:0016817|GO:0000166|GO:0001882|GO:0016459|GO:0032549|GO:0016818|GO:0005856|GO:0016462|GO:0015629|GO:0005524|GO:0003774	catalytic activity|intracellular|protein binding|hydrolase activity|hydrolase activity, acting on acid anhydrides|nucleotide binding|nucleoside binding|myosin complex|ribonucleoside binding|hydrolase activity, acting on acid anhydrides, in phosphorus-containing anhydrides|cytoskeleton|pyrophosphatase activity|actin cytoskeleton|ATP binding|motor activity	-	-	-	-	Chr19:1531033-1542489	9	8	5	2	0	3	0.197455	0.16533	0.104517	0.0475935	0	0.0527383	0.155767	0.0334439	2.21958	0.00297571	0.0401647	UP
Potri.001G051600	ATCHS,CHS,TT4	Chalcone and stilbene synthase family protein	GO:0003824|GO:0008152|GO:0071704|GO:0009058|GO:0016740|GO:0044238|GO:0016746|GO:0006629|GO:0008610|GO:0016747	catalytic activity|metabolic process|organic substance metabolic process|biosynthetic process|transferase activity|primary metabolic process|transferase activity, transferring acyl groups|lipid metabolic process|lipid biosynthetic process|transferase activity, transferring acyl groups other than amino-acyl groups	K00660	chalcone synthase[2.3.1.74]	ko01100|ko01100|ko01110|ko04712|ko00941	Metabolic pathways|Metabolic pathways|Biosynthesis of secondary metabolites|Circadian rhythm - plant|Flavonoid biosynthesis	Chr01:3916051-3918380	16	12	8	5	3	5	1.32643	0.937057	0.631802	0.449532	0.224326	0.332098	0.965096	0.335319	1.52514	0.00299535	0.0403567	UP
Potri.008G210500	-	-	-	-	-	-	-	-	Chr08:16225724-16226211	22	19	17	10	9	10	4.94441	4.02215	3.63994	2.43714	1.82449	1.80068	4.20217	2.02077	1.05623	0.00300058	0.040409	UP
Potri.005G063200	ATMYB69,MYB69	myb domain protein 69	-	-	-	-	-	-	Chr05:4547068-4548524	12	11	15	22	39	22	0.977095	0.843598	1.16357	1.94252	2.86428	1.43518	0.994753	2.08066	-1.06463	0.00301636	0.0405119	DOWN
[truncated: 33 more rows]

## Sheet: Table S6
Table S6 DEGs identiﬁed by comparing DET2-OE-XY with 84K-XY.
[truncated: 1,053 more rows]

## Sheet: Table S7
Table S7 GO enrichment analysis of the DEGs in the PS domain.
[truncated: 72 more rows]

[truncated: 7 more sheets: Table S8, Table S9, Table S10, Table S11, Table S12, Table S13, Table S14]
